# Supplementary material for: The bee family Halictidae (Hymenoptera, Apoidea) from Central Asia collected by the Kyushu and Shimane Universities Expeditions
Source: Biodivers Data J. 2017 Oct 20;(5):e15050. doi: 10.3897/BDJ.5.e15050 (PMC5665013; doi:10.3897/BDJ.5.e15050)
Supplement: Supplementary material 1 — Specimens data [file bdj-05-e15050-s001.xlsx]

## Sheet: Specimens data
Specimens ID Number	Specimens Box Number	Data Last Modified	Institution Code	Collection Code	Scientific Name	Kingdom	Phylum	Class	Order	Family	Subfamily	Genus	Species	Subspecies	ScientificNameAuthor	Identified by	Year Identified	Collector	Collecting data	Country	StateProvince	Locality Code	Locality	Longitude	Latitude	Sex	Notes	individuals
BeeCAsia0009494	BeeCAsia 28	28/5/2017	ELKU	BeeCAsia	Systropha (Systropha) curvicornis	Animalia	Arthropoda	Insecta	Hymenoptera	Halictidae	Rophitinae	Systropha	curvicornis		(Scopoli, 1770)	R. Murao	2012	A. Dawut	27/08/2002	CN	Altay Prov.	CN2	Jeminay County, alt. 800-1050 m, Altay Prov., Xinjiang Uygur Aut. Reg.			F		1
BeeCAsia0009484	BeeCAsia 41	28/5/2017	ELKU	BeeCAsia	Pseudapis (Nomiapis) fugax	Animalia	Arthropoda	Insecta	Hymenoptera	Halictidae	Nomiinae	Pseudapis	fugax		(Morawitz, 1877)	R. Murao	2012	R. Murao	22/08/2002	CN	Changji Prov.	CN3	Fukang, alt. 520m, Changji Prov., Xinjiang Uygur Aut. Reg.			F	host: Tamarix sp.	1
BeeCAsia0009485	BeeCAsia 41	28/5/2017	ELKU	BeeCAsia	Pseudapis (Nomiapis) fugax	Animalia	Arthropoda	Insecta	Hymenoptera	Halictidae	Nomiinae	Pseudapis	fugax		(Morawitz, 1877)	R. Murao	2012	R. Murao	22/08/2002	CN	Changji Prov.	CN3	Fukang, alt. 520m, Changji Prov., Xinjiang Uygur Aut. Reg.			F	host: Tamarix sp.	1
BeeCAsia0009486	BeeCAsia 41	28/5/2017	ELKU	BeeCAsia	Pseudapis (Nomiapis) fugax	Animalia	Arthropoda	Insecta	Hymenoptera	Halictidae	Nomiinae	Pseudapis	fugax		(Morawitz, 1877)	R. Murao	2012	R. Murao	22/08/2002	CN	Changji Prov.	CN3	Fukang, alt. 520m, Changji Prov., Xinjiang Uygur Aut. Reg.			F	host: Tamarix sp.	1
BeeCAsia0009482	BeeCAsia 41	28/5/2017	ELKU	BeeCAsia	Pseudapis (Nomiapis) fugax	Animalia	Arthropoda	Insecta	Hymenoptera	Halictidae	Nomiinae	Pseudapis	fugax		(Morawitz, 1877)	R. Murao	2012	O. Tadauchi	25/08/2002	CN	Ili Prov.	CN5	Guozigou, alt. 1230 m, Ili Prov., Xinjiang Uygur Aut. Reg.			F	host: Cirsium sp.	1
BeeCAsia0009473	BeeCAsia 28	28/5/2017	ELKU	BeeCAsia	Pseudapis (Nomiapis) diversipes	Animalia	Arthropoda	Insecta	Hymenoptera	Halictidae	Nomiinae	Pseudapis	diversipes		(Latreille, 1806)	R. Murao	2012	O. Tadauchi	04/09/2002	KZ	South Kazakhstan Prov.	KZ37	Aksu Jabagly, alt. 1080-1830 m, South Kazakhstan Prov.			F	host: Mentha asiatica	1
BeeCAsia0009474	BeeCAsia 28	28/5/2017	ELKU	BeeCAsia	Pseudapis (Nomiapis) diversipes	Animalia	Arthropoda	Insecta	Hymenoptera	Halictidae	Nomiinae	Pseudapis	diversipes		(Latreille, 1806)	R. Murao	2012	O. Tadauchi	04/09/2002	KZ	South Kazakhstan Prov.	KZ37	Aksu Jabagly, alt. 1080-1830 m, South Kazakhstan Prov.			F	host: Mentha asiatica	1
BeeCAsia0024698	BeeCAsia 20	28/5/2017	ELKU	BeeCAsia	Halictus (Seladonia) pjalmensis pjalmensis	Animalia	Arthropoda	Insecta	Hymenoptera	Halictidae	Halictinae	Halictus	pjalmensis	pjalmensis	Strand, 1909	R. Murao	2012	A. Dawut	27/05/2000	KG	Bishkek	KG1	Bishkek City			F	host: Trifolium repens	1
BeeCAsia0009443	BeeCAsia 28	28/5/2017	ELKU	BeeCAsia	Pseudapis (Nomiapis) diversipes	Animalia	Arthropoda	Insecta	Hymenoptera	Halictidae	Nomiinae	Pseudapis	diversipes		(Latreille, 1806)	R. Murao	2012	O. Tadauchi	20/08/2003	KZ	Jambyl Prov.	KZ25	Kenen, near Otar, Jambyl Prov.			F		1
BeeCAsia0009445	BeeCAsia 28	28/5/2017	ELKU	BeeCAsia	Pseudapis (Nomiapis) diversipes	Animalia	Arthropoda	Insecta	Hymenoptera	Halictidae	Nomiinae	Pseudapis	diversipes		(Latreille, 1806)	R. Murao	2012	O. Tadauchi	20/08/2003	KZ	Jambyl Prov.	KZ25	Kenen, near Otar, Jambyl Prov.			F		1
BeeCAsia0009435	BeeCAsia 28	28/5/2017	ELKU	BeeCAsia	Pseudapis (Nomiapis) diversipes	Animalia	Arthropoda	Insecta	Hymenoptera	Halictidae	Nomiinae	Pseudapis	diversipes		(Latreille, 1806)	R. Murao	2012	O. Tadauchi	26/05/2000	KZ	Almaty	KZ4	Fabrichini, alt. 850 m, Almaty			F	host: Leguminosae gen. et. sp.	1
BeeCAsia0009436	BeeCAsia 28	28/5/2017	ELKU	BeeCAsia	Pseudapis (Nomiapis) diversipes	Animalia	Arthropoda	Insecta	Hymenoptera	Halictidae	Nomiinae	Pseudapis	diversipes		(Latreille, 1806)	R. Murao	2012	O. Tadauchi	26/05/2000	KZ	Almaty	KZ4	Fabrichini, alt. 850 m, Almaty			F	host: Leguminosae gen. et. sp.	1
BeeCAsia0009437	BeeCAsia 28	28/5/2017	ELKU	BeeCAsia	Pseudapis (Nomiapis) diversipes	Animalia	Arthropoda	Insecta	Hymenoptera	Halictidae	Nomiinae	Pseudapis	diversipes		(Latreille, 1806)	R. Murao	2012	O. Tadauchi	26/05/2000	KZ	Almaty	KZ4	Fabrichini, alt. 850 m, Almaty			F	host: Leguminosae gen. et. sp.	1
BeeCAsia0009438	BeeCAsia 28	28/5/2017	ELKU	BeeCAsia	Pseudapis (Nomiapis) diversipes	Animalia	Arthropoda	Insecta	Hymenoptera	Halictidae	Nomiinae	Pseudapis	diversipes		(Latreille, 1806)	R. Murao	2012	O. Tadauchi	26/05/2000	KZ	Almaty	KZ4	Fabrichini, alt. 850 m, Almaty			F	host: Leguminosae gen. et. sp.	1
BeeCAsia0009439	BeeCAsia 28	28/5/2017	ELKU	BeeCAsia	Pseudapis (Nomiapis) diversipes	Animalia	Arthropoda	Insecta	Hymenoptera	Halictidae	Nomiinae	Pseudapis	diversipes		(Latreille, 1806)	R. Murao	2012	O. Tadauchi	26/05/2000	KZ	Almaty	KZ4	Fabrichini, alt. 850 m, Almaty			F	host: Leguminosae gen. et. sp.	1
BeeCAsia0009440	BeeCAsia 28	28/5/2017	ELKU	BeeCAsia	Pseudapis (Nomiapis) diversipes	Animalia	Arthropoda	Insecta	Hymenoptera	Halictidae	Nomiinae	Pseudapis	diversipes		(Latreille, 1806)	R. Murao	2012	O. Tadauchi	26/05/2000	KZ	Almaty	KZ4	Fabrichini, alt. 850 m, Almaty			F	host: Leguminosae gen. et. sp.	1
BeeCAsia0009441	BeeCAsia 28	28/5/2017	ELKU	BeeCAsia	Pseudapis (Nomiapis) diversipes	Animalia	Arthropoda	Insecta	Hymenoptera	Halictidae	Nomiinae	Pseudapis	diversipes		(Latreille, 1806)	R. Murao	2012	O. Tadauchi	26/05/2000	KZ	Almaty	KZ4	Fabrichini, alt. 850 m, Almaty			F	host: Leguminosae gen. et. sp.	1
BeeCAsia0009442	BeeCAsia 28	28/5/2017	ELKU	BeeCAsia	Pseudapis (Nomiapis) diversipes	Animalia	Arthropoda	Insecta	Hymenoptera	Halictidae	Nomiinae	Pseudapis	diversipes		(Latreille, 1806)	R. Murao	2012	O. Tadauchi	26/05/2000	KZ	Almaty	KZ4	Fabrichini, alt. 850 m, Almaty			F	host: Leguminosae gen. et. sp.	1
BeeCAsia0009428	BeeCAsia 28	28/5/2017	ELKU	BeeCAsia	Pseudapis (Nomiapis) diversipes	Animalia	Arthropoda	Insecta	Hymenoptera	Halictidae	Nomiinae	Pseudapis	diversipes		(Latreille, 1806)	R. Murao	2012	A. Dawut	26/05/2000	KZ	Almaty	KZ7	Kurday, alt. 800-880 m, Almaty			F	host: Brassica sp.	1
BeeCAsia0009429	BeeCAsia 28	28/5/2017	ELKU	BeeCAsia	Pseudapis (Nomiapis) diversipes	Animalia	Arthropoda	Insecta	Hymenoptera	Halictidae	Nomiinae	Pseudapis	diversipes		(Latreille, 1806)	R. Murao	2012	A. Dawut	26/05/2000	KZ	Almaty	KZ7	Kurday, alt. 800-880 m, Almaty			F	host: Brassica sp.	1
BeeCAsia0009430	BeeCAsia 28	28/5/2017	ELKU	BeeCAsia	Pseudapis (Nomiapis) diversipes	Animalia	Arthropoda	Insecta	Hymenoptera	Halictidae	Nomiinae	Pseudapis	diversipes		(Latreille, 1806)	R. Murao	2012	A. Dawut	26/05/2000	KZ	Almaty	KZ7	Kurday, alt. 800-880 m, Almaty			F	host: Brassica sp.	1
BeeCAsia0009431	BeeCAsia 28	28/5/2017	ELKU	BeeCAsia	Pseudapis (Nomiapis) diversipes	Animalia	Arthropoda	Insecta	Hymenoptera	Halictidae	Nomiinae	Pseudapis	diversipes		(Latreille, 1806)	R. Murao	2012	A. Dawut	26/05/2000	KZ	Almaty	KZ7	Kurday, alt. 800-880 m, Almaty			F	host: Brassica sp.	1
BeeCAsia0009432	BeeCAsia 28	28/5/2017	ELKU	BeeCAsia	Pseudapis (Nomiapis) diversipes	Animalia	Arthropoda	Insecta	Hymenoptera	Halictidae	Nomiinae	Pseudapis	diversipes		(Latreille, 1806)	R. Murao	2012	A. Dawut	26/05/2000	KZ	Almaty	KZ7	Kurday, alt. 800-880 m, Almaty			F	host: Brassica sp.	1
BeeCAsia0009433	BeeCAsia 28	28/5/2017	ELKU	BeeCAsia	Pseudapis (Nomiapis) diversipes	Animalia	Arthropoda	Insecta	Hymenoptera	Halictidae	Nomiinae	Pseudapis	diversipes		(Latreille, 1806)	R. Murao	2012	A. Dawut	26/05/2000	KZ	Almaty	KZ7	Kurday, alt. 800-880 m, Almaty			F	host: Brassica sp.	1
BeeCAsia0009434	BeeCAsia 28	28/5/2017	ELKU	BeeCAsia	Pseudapis (Nomiapis) diversipes	Animalia	Arthropoda	Insecta	Hymenoptera	Halictidae	Nomiinae	Pseudapis	diversipes		(Latreille, 1806)	R. Murao	2012	A. Dawut	26/05/2000	KZ	Almaty	KZ7	Kurday, alt. 800-880 m, Almaty			F	host: Brassica sp.	1
BeeCAsia0009447	BeeCAsia 28	28/5/2017	ELKU	BeeCAsia	Pseudapis (Nomiapis) diversipes	Animalia	Arthropoda	Insecta	Hymenoptera	Halictidae	Nomiinae	Pseudapis	diversipes		(Latreille, 1806)	R. Murao	2012	A. Dawut	26/05/2000	KZ	Almaty	KZ7	Kurday, alt. 800-880 m, Almaty			F	host: Brassica sp.	1
BeeCAsia0009448	BeeCAsia 28	28/5/2017	ELKU	BeeCAsia	Pseudapis (Nomiapis) diversipes	Animalia	Arthropoda	Insecta	Hymenoptera	Halictidae	Nomiinae	Pseudapis	diversipes		(Latreille, 1806)	R. Murao	2012	A. Dawut	26/05/2000	KZ	Almaty	KZ7	Kurday, alt. 800-880 m, Almaty			F	host: Brassica sp.	1
BeeCAsia0009444	BeeCAsia 28	28/5/2017	ELKU	BeeCAsia	Pseudapis (Nomiapis) diversipes	Animalia	Arthropoda	Insecta	Hymenoptera	Halictidae	Nomiinae	Pseudapis	diversipes		(Latreille, 1806)	R. Murao	2012	A. Dawut	26/05/2000	KZ	Almaty	KZ5	Kemertogan, Almaty			F	host: Leguminosae gen. et. sp.	1
BeeCAsia0009470	BeeCAsia 28	28/5/2017	ELKU	BeeCAsia	Pseudapis (Nomiapis) diversipes	Animalia	Arthropoda	Insecta	Hymenoptera	Halictidae	Nomiinae	Pseudapis	diversipes		(Latreille, 1806)	R. Murao	2012	O. Tadauchi	24/08/2002	CN	Ili Prov.	CN7	Kuitun City, alt. 530 m, Ili Prov., Xinjiang Uygur Aut. Reg.			F		1
BeeCAsia0009472	BeeCAsia 28	28/5/2017	ELKU	BeeCAsia	Pseudapis (Nomiapis) diversipes	Animalia	Arthropoda	Insecta	Hymenoptera	Halictidae	Nomiinae	Pseudapis	diversipes		(Latreille, 1806)	R. Murao	2012	R. Miyanaga	24/08/2002	CN	Ili Prov.	CN7	Kuitun City, alt. 530 m, Ili Prov., Xinjiang Uygur Aut. Reg.			F	host: Solidago sp.	1
BeeCAsia0009475	BeeCAsia 28	28/5/2017	ELKU	BeeCAsia	Pseudapis (Nomiapis) diversipes	Animalia	Arthropoda	Insecta	Hymenoptera	Halictidae	Nomiinae	Pseudapis	diversipes		(Latreille, 1806)	R. Murao	2012	R. Miyanaga	24/08/2002	CN	Ili Prov.	CN7	Kuitun City, alt. 530 m, Ili Prov., Xinjiang Uygur Aut. Reg.			F	host: Solidago sp.	1
BeeCAsia0009488	BeeCAsia 41	28/5/2017	ELKU	BeeCAsia	Pseudapis (Nomiapis) femoralis	Animalia	Arthropoda	Insecta	Hymenoptera	Halictidae	Nomiinae	Pseudapis	femoralis		(Pallas, 1773)	R. Murao	2012	R. Miyanaga	25/08/2002	CN	Ili Prov.	CN8	near Sayram Lake, alt. 1970 m, Ili Prov., Xinjiang Uygur Aut. Reg.			F	host: Echinops sp.	1
BeeCAsia0009471	BeeCAsia 28	28/5/2017	ELKU	BeeCAsia	Pseudapis (Nomiapis) diversipes	Animalia	Arthropoda	Insecta	Hymenoptera	Halictidae	Nomiinae	Pseudapis	diversipes		(Latreille, 1806)	R. Murao	2012	A. Dawut	23/08/2002	CN	Turpan Prov.	CN13	Sugongta, Turpan Prov., Xinjiang Uygur Aut. Reg.			F		1
BeeCAsia0009478	BeeCAsia 41	28/5/2017	ELKU	BeeCAsia	Pseudapis (Nomiapis) fugax	Animalia	Arthropoda	Insecta	Hymenoptera	Halictidae	Nomiinae	Pseudapis	fugax		(Morawitz, 1877)	R. Murao	2012	O. Tadauchi	22/08/2002	CN	Changji Prov.	CN3	Fukang, alt. 520m, Changji Prov., Xinjiang Uygur Aut. Reg.			F		1
BeeCAsia0009479	BeeCAsia 41	28/5/2017	ELKU	BeeCAsia	Pseudapis (Nomiapis) fugax	Animalia	Arthropoda	Insecta	Hymenoptera	Halictidae	Nomiinae	Pseudapis	fugax		(Morawitz, 1877)	R. Murao	2012	O. Tadauchi	22/08/2002	CN	Changji Prov.	CN3	Fukang, alt. 520m, Changji Prov., Xinjiang Uygur Aut. Reg.			F		1
BeeCAsia0009480	BeeCAsia 41	28/5/2017	ELKU	BeeCAsia	Pseudapis (Nomiapis) fugax	Animalia	Arthropoda	Insecta	Hymenoptera	Halictidae	Nomiinae	Pseudapis	fugax		(Morawitz, 1877)	R. Murao	2012	O. Tadauchi	22/08/2002	CN	Changji Prov.	CN3	Fukang, alt. 520m, Changji Prov., Xinjiang Uygur Aut. Reg.			F	host: Tamarix sp.	1
BeeCAsia0009481	BeeCAsia 41	28/5/2017	ELKU	BeeCAsia	Pseudapis (Nomiapis) fugax	Animalia	Arthropoda	Insecta	Hymenoptera	Halictidae	Nomiinae	Pseudapis	fugax		(Morawitz, 1877)	R. Murao	2012	O. Tadauchi	22/08/2002	CN	Changji Prov.	CN3	Fukang, alt. 520m, Changji Prov., Xinjiang Uygur Aut. Reg.			F		1
BeeCAsia0009483	BeeCAsia 41	28/5/2017	ELKU	BeeCAsia	Pseudapis (Nomiapis) fugax	Animalia	Arthropoda	Insecta	Hymenoptera	Halictidae	Nomiinae	Pseudapis	fugax		(Morawitz, 1877)	R. Murao	2012	O. Tadauchi	22/08/2002	CN	Changji Prov.	CN3	Fukang, alt. 520m, Changji Prov., Xinjiang Uygur Aut. Reg.			F		1
BeeCAsia0009487	BeeCAsia 41	28/5/2017	ELKU	BeeCAsia	Pseudapis (Nomiapis) fugax	Animalia	Arthropoda	Insecta	Hymenoptera	Halictidae	Nomiinae	Pseudapis	fugax		(Morawitz, 1877)	R. Murao	2012	O. Tadauchi	22/08/2002	CN	Changji Prov.	CN3	Fukang, alt. 520m, Changji Prov., Xinjiang Uygur Aut. Reg.			F		1
BeeCAsia0009449	BeeCAsia 28	28/5/2017	ELKU	BeeCAsia	Pseudapis (Nomiapis) diversipes	Animalia	Arthropoda	Insecta	Hymenoptera	Halictidae	Nomiinae	Pseudapis	diversipes		(Latreille, 1806)	R. Murao	2012	O. Tadauchi	26/05/2000	KZ	Almaty	KZ4	Fabrichini, alt. 850 m, Almaty			M	host: Leguminosae gen. et. sp.	1
BeeCAsia0009450	BeeCAsia 28	28/5/2017	ELKU	BeeCAsia	Pseudapis (Nomiapis) diversipes	Animalia	Arthropoda	Insecta	Hymenoptera	Halictidae	Nomiinae	Pseudapis	diversipes		(Latreille, 1806)	R. Murao	2012	O. Tadauchi	26/05/2000	KZ	Almaty	KZ4	Fabrichini, alt. 850 m, Almaty			M	host: Leguminosae gen. et. sp.	1
BeeCAsia0009451	BeeCAsia 28	28/5/2017	ELKU	BeeCAsia	Pseudapis (Nomiapis) diversipes	Animalia	Arthropoda	Insecta	Hymenoptera	Halictidae	Nomiinae	Pseudapis	diversipes		(Latreille, 1806)	R. Murao	2012	O. Tadauchi	26/05/2000	KZ	Almaty	KZ4	Fabrichini, alt. 850 m, Almaty			M	host: Leguminosae gen. et. sp.	1
BeeCAsia0009452	BeeCAsia 28	28/5/2017	ELKU	BeeCAsia	Pseudapis (Nomiapis) diversipes	Animalia	Arthropoda	Insecta	Hymenoptera	Halictidae	Nomiinae	Pseudapis	diversipes		(Latreille, 1806)	R. Murao	2012	O. Tadauchi	26/05/2000	KZ	Almaty	KZ4	Fabrichini, alt. 850 m, Almaty			M	host: Leguminosae gen. et. sp.	1
BeeCAsia0009454	BeeCAsia 28	28/5/2017	ELKU	BeeCAsia	Pseudapis (Nomiapis) diversipes	Animalia	Arthropoda	Insecta	Hymenoptera	Halictidae	Nomiinae	Pseudapis	diversipes		(Latreille, 1806)	R. Murao	2012	O. Tadauchi	26/05/2000	KZ	Almaty	KZ4	Fabrichini, alt. 850 m, Almaty			M	host: Leguminosae gen. et. sp.	1
BeeCAsia0009455	BeeCAsia 28	28/5/2017	ELKU	BeeCAsia	Pseudapis (Nomiapis) diversipes	Animalia	Arthropoda	Insecta	Hymenoptera	Halictidae	Nomiinae	Pseudapis	diversipes		(Latreille, 1806)	R. Murao	2012	O. Tadauchi	26/05/2000	KZ	Almaty	KZ4	Fabrichini, alt. 850 m, Almaty			M	host: Leguminosae gen. et. sp.	1
BeeCAsia0009456	BeeCAsia 28	28/5/2017	ELKU	BeeCAsia	Pseudapis (Nomiapis) diversipes	Animalia	Arthropoda	Insecta	Hymenoptera	Halictidae	Nomiinae	Pseudapis	diversipes		(Latreille, 1806)	R. Murao	2012	O. Tadauchi	26/05/2000	KZ	Almaty	KZ4	Fabrichini, alt. 850 m, Almaty			M	host: Leguminosae gen. et. sp.	1
BeeCAsia0009457	BeeCAsia 28	28/5/2017	ELKU	BeeCAsia	Pseudapis (Nomiapis) diversipes	Animalia	Arthropoda	Insecta	Hymenoptera	Halictidae	Nomiinae	Pseudapis	diversipes		(Latreille, 1806)	R. Murao	2012	O. Tadauchi	26/05/2000	KZ	Almaty	KZ4	Fabrichini, alt. 850 m, Almaty			M	host: Leguminosae gen. et. sp.	1
BeeCAsia0009459	BeeCAsia 28	28/5/2017	ELKU	BeeCAsia	Pseudapis (Nomiapis) diversipes	Animalia	Arthropoda	Insecta	Hymenoptera	Halictidae	Nomiinae	Pseudapis	diversipes		(Latreille, 1806)	R. Murao	2012	O. Tadauchi	26/05/2000	KZ	Almaty	KZ4	Fabrichini, alt. 850 m, Almaty			M	host: Leguminosae gen. et. sp.	1
BeeCAsia0009460	BeeCAsia 28	28/5/2017	ELKU	BeeCAsia	Pseudapis (Nomiapis) diversipes	Animalia	Arthropoda	Insecta	Hymenoptera	Halictidae	Nomiinae	Pseudapis	diversipes		(Latreille, 1806)	R. Murao	2012	O. Tadauchi	26/05/2000	KZ	Almaty	KZ4	Fabrichini, alt. 850 m, Almaty			M	host: Leguminosae gen. et. sp.	1
BeeCAsia0009461	BeeCAsia 28	28/5/2017	ELKU	BeeCAsia	Pseudapis (Nomiapis) diversipes	Animalia	Arthropoda	Insecta	Hymenoptera	Halictidae	Nomiinae	Pseudapis	diversipes		(Latreille, 1806)	R. Murao	2012	O. Tadauchi	26/05/2000	KZ	Almaty	KZ4	Fabrichini, alt. 850 m, Almaty			M	host: Leguminosae gen. et. sp.	1
BeeCAsia0009468	BeeCAsia 28	28/5/2017	ELKU	BeeCAsia	Pseudapis (Nomiapis) diversipes	Animalia	Arthropoda	Insecta	Hymenoptera	Halictidae	Nomiinae	Pseudapis	diversipes		(Latreille, 1806)	R. Murao	2012	O. Tadauchi	26/05/2000	KZ	Almaty	KZ4	Fabrichini, alt. 850 m, Almaty			M	host: Leguminosae gen. et. sp.	1
BeeCAsia0009469	BeeCAsia 28	28/5/2017	ELKU	BeeCAsia	Pseudapis (Nomiapis) diversipes	Animalia	Arthropoda	Insecta	Hymenoptera	Halictidae	Nomiinae	Pseudapis	diversipes		(Latreille, 1806)	R. Murao	2012	O. Tadauchi	26/05/2000	KZ	Almaty	KZ4	Fabrichini, alt. 850 m, Almaty			M	host: Leguminosae gen. et. sp.	1
BeeCAsia0009462	BeeCAsia 28	28/5/2017	ELKU	BeeCAsia	Pseudapis (Nomiapis) diversipes	Animalia	Arthropoda	Insecta	Hymenoptera	Halictidae	Nomiinae	Pseudapis	diversipes		(Latreille, 1806)	R. Murao	2012	A. Dawut	26/05/2000	KZ	Almaty	KZ7	Kurday, alt. 800-880 m, Almaty			M	host: Brassica sp.	1
BeeCAsia0009463	BeeCAsia 28	28/5/2017	ELKU	BeeCAsia	Pseudapis (Nomiapis) diversipes	Animalia	Arthropoda	Insecta	Hymenoptera	Halictidae	Nomiinae	Pseudapis	diversipes		(Latreille, 1806)	R. Murao	2012	A. Dawut	26/05/2000	KZ	Almaty	KZ7	Kurday, alt. 800-880 m, Almaty			M	host: Brassica sp.	1
BeeCAsia0009464	BeeCAsia 28	28/5/2017	ELKU	BeeCAsia	Pseudapis (Nomiapis) diversipes	Animalia	Arthropoda	Insecta	Hymenoptera	Halictidae	Nomiinae	Pseudapis	diversipes		(Latreille, 1806)	R. Murao	2012	A. Dawut	26/05/2000	KZ	Almaty	KZ7	Kurday, alt. 800-880 m, Almaty			M	host: Brassica sp.	1
BeeCAsia0009465	BeeCAsia 28	28/5/2017	ELKU	BeeCAsia	Pseudapis (Nomiapis) diversipes	Animalia	Arthropoda	Insecta	Hymenoptera	Halictidae	Nomiinae	Pseudapis	diversipes		(Latreille, 1806)	R. Murao	2012	A. Dawut	26/05/2000	KZ	Almaty	KZ7	Kurday, alt. 800-880 m, Almaty			M	host: Brassica sp.	1
BeeCAsia0009453	BeeCAsia 28	28/5/2017	ELKU	BeeCAsia	Pseudapis (Nomiapis) diversipes	Animalia	Arthropoda	Insecta	Hymenoptera	Halictidae	Nomiinae	Pseudapis	diversipes		(Latreille, 1806)	R. Murao	2012	O. Tadauchi	28/05/2000	KZ	Almaty	KZ3	Degeres, alt. 850 m, Almaty			M	host: Achillea sp.	1
BeeCAsia0009458	BeeCAsia 28	28/5/2017	ELKU	BeeCAsia	Pseudapis (Nomiapis) diversipes	Animalia	Arthropoda	Insecta	Hymenoptera	Halictidae	Nomiinae	Pseudapis	diversipes		(Latreille, 1806)	R. Murao	2012	A. Dawut	26/05/2000	KZ	Almaty	KZ5	Kemertogan, Almaty			M	host: Leguminosae gen. et. sp.	1
BeeCAsia0009477	BeeCAsia 28	28/5/2017	ELKU	BeeCAsia	Pseudapis (Nomiapis) diversipes	Animalia	Arthropoda	Insecta	Hymenoptera	Halictidae	Nomiinae	Pseudapis	diversipes		(Latreille, 1806)	R. Murao	2012	K. Mitai	08/06/2003	KZ	South Kazakhstan Prov.	KZ63	Shayan-Birlik, South Kazakhstan Prov.			M	host: Cruciferae sp.	1
BeeCAsia0009476	BeeCAsia 28	28/5/2017	ELKU	BeeCAsia	Pseudapis (Nomiapis) diversipes	Animalia	Arthropoda	Insecta	Hymenoptera	Halictidae	Nomiinae	Pseudapis	diversipes		(Latreille, 1806)	R. Murao	2012	R. Miyanaga	22/08/2002	CN	Changji Prov.	CN3	Fukang, alt. 520m, Changji Prov., Xinjiang Uygur Aut. Reg.			M	host: Tamarix sp.	1
BeeCAsia0009489	BeeCAsia 41	28/5/2017	ELKU	BeeCAsia	Pseudapis (Nomiapis) fugax	Animalia	Arthropoda	Insecta	Hymenoptera	Halictidae	Nomiinae	Pseudapis	fugax		(Morawitz, 1877)	R. Murao	2012	O. Tadauchi	22/08/2002	CN	Changji Prov.	CN3	Fukang, alt. 520m, Changji Prov., Xinjiang Uygur Aut. Reg.			M	host: Tamarix sp.	1
BeeCAsia0009466	BeeCAsia 28	28/5/2017	ELKU	BeeCAsia	Pseudapis (Nomiapis) diversipes	Animalia	Arthropoda	Insecta	Hymenoptera	Halictidae	Nomiinae	Pseudapis	diversipes		(Latreille, 1806)	R. Murao	2012	A. Dawut	26/05/2000	KZ	Almaty	KZ7	Kurday, alt. 800-880 m, Almaty			M	host: Brassica sp.	1
BeeCAsia0009467	BeeCAsia 28	28/5/2017	ELKU	BeeCAsia	Pseudapis (Nomiapis) diversipes	Animalia	Arthropoda	Insecta	Hymenoptera	Halictidae	Nomiinae	Pseudapis	diversipes		(Latreille, 1806)	R. Murao	2012	A. Dawut	26/05/2000	KZ	Almaty	KZ7	Kurday, alt. 800-880 m, Almaty			M	host: Brassica sp.	1
BeeCAsia0009321	BeeCAsia 28	28/5/2017	ELKU	BeeCAsia	Ceylalictus (Ceylalictus) variegatus	Animalia	Arthropoda	Insecta	Hymenoptera	Halictidae	Nomioidinae	Ceylalictus	variegatus		(Olivier, 1789)	R. Murao	2012	A. Dawut	22/08/2002	CN	Changji Prov.	CN3	Fukang, alt. 520m, Changji Prov., Xinjiang Uygur Aut. Reg.			M	host: Tamarix sp.	1
BeeCAsia0009324	BeeCAsia 28	28/5/2017	ELKU	BeeCAsia	Ceylalictus (Ceylalictus) variegatus	Animalia	Arthropoda	Insecta	Hymenoptera	Halictidae	Nomioidinae	Ceylalictus	variegatus		(Olivier, 1789)	R. Murao	2012	A. Dawut	22/08/2002	CN	Changji Prov.	CN3	Fukang, alt. 520m, Changji Prov., Xinjiang Uygur Aut. Reg.			M	host: Tamarix sp.	1
BeeCAsia0009322	BeeCAsia 28	28/5/2017	ELKU	BeeCAsia	Ceylalictus (Ceylalictus) variegatus	Animalia	Arthropoda	Insecta	Hymenoptera	Halictidae	Nomioidinae	Ceylalictus	variegatus		(Olivier, 1789)	R. Murao	2012	R. Murao	22/08/2002	CN	Changji Prov.	CN3	Fukang, alt. 520m, Changji Prov., Xinjiang Uygur Aut. Reg.			M	host: Tamarix sp.	1
BeeCAsia0009180	BeeCAsia 28	28/5/2017	ELKU	BeeCAsia	Nomioides minutissimus minutissimus	Animalia	Arthropoda	Insecta	Hymenoptera	Halictidae	Nomioidinae	Nomioides	minutissimus	minutissimus	(Rossi, 1790)	R. Murao	2012	A. Dawut	22/08/2002	CN	Changji Prov.	CN3	Fukang, alt. 520m, Changji Prov., Xinjiang Uygur Aut. Reg.			M	host: Tamarix sp.	1
BeeCAsia0009181	BeeCAsia 28	28/5/2017	ELKU	BeeCAsia	Nomioides minutissimus minutissimus	Animalia	Arthropoda	Insecta	Hymenoptera	Halictidae	Nomioidinae	Nomioides	minutissimus	minutissimus	(Rossi, 1790)	R. Murao	2012	A. Dawut	22/08/2002	CN	Changji Prov.	CN3	Fukang, alt. 520m, Changji Prov., Xinjiang Uygur Aut. Reg.			M	host: Tamarix sp.	1
BeeCAsia0009234	BeeCAsia 28	28/5/2017	ELKU	BeeCAsia	Nomioides minutissimus minutissimus	Animalia	Arthropoda	Insecta	Hymenoptera	Halictidae	Nomioidinae	Nomioides	minutissimus	minutissimus	(Rossi, 1790)	R. Murao	2012	A. Dawut	22/08/2002	CN	Changji Prov.	CN3	Fukang, alt. 520m, Changji Prov., Xinjiang Uygur Aut. Reg.			M	host: Tamarix sp.	1
BeeCAsia0009235	BeeCAsia 28	28/5/2017	ELKU	BeeCAsia	Nomioides minutissimus minutissimus	Animalia	Arthropoda	Insecta	Hymenoptera	Halictidae	Nomioidinae	Nomioides	minutissimus	minutissimus	(Rossi, 1790)	R. Murao	2012	A. Dawut	22/08/2002	CN	Changji Prov.	CN3	Fukang, alt. 520m, Changji Prov., Xinjiang Uygur Aut. Reg.			M	host: Tamarix sp.	1
BeeCAsia0009236	BeeCAsia 28	28/5/2017	ELKU	BeeCAsia	Nomioides minutissimus minutissimus	Animalia	Arthropoda	Insecta	Hymenoptera	Halictidae	Nomioidinae	Nomioides	minutissimus	minutissimus	(Rossi, 1790)	R. Murao	2012	A. Dawut	22/08/2002	CN	Changji Prov.	CN3	Fukang, alt. 520m, Changji Prov., Xinjiang Uygur Aut. Reg.			M	host: Tamarix sp.	1
BeeCAsia0009237	BeeCAsia 28	28/5/2017	ELKU	BeeCAsia	Nomioides minutissimus minutissimus	Animalia	Arthropoda	Insecta	Hymenoptera	Halictidae	Nomioidinae	Nomioides	minutissimus	minutissimus	(Rossi, 1790)	R. Murao	2012	A. Dawut	22/08/2002	CN	Changji Prov.	CN3	Fukang, alt. 520m, Changji Prov., Xinjiang Uygur Aut. Reg.			M	host: Tamarix sp.	1
BeeCAsia0009238	BeeCAsia 28	28/5/2017	ELKU	BeeCAsia	Nomioides minutissimus minutissimus	Animalia	Arthropoda	Insecta	Hymenoptera	Halictidae	Nomioidinae	Nomioides	minutissimus	minutissimus	(Rossi, 1790)	R. Murao	2012	A. Dawut	22/08/2002	CN	Changji Prov.	CN3	Fukang, alt. 520m, Changji Prov., Xinjiang Uygur Aut. Reg.			M	host: Tamarix sp.	1
BeeCAsia0009239	BeeCAsia 28	28/5/2017	ELKU	BeeCAsia	Nomioides minutissimus minutissimus	Animalia	Arthropoda	Insecta	Hymenoptera	Halictidae	Nomioidinae	Nomioides	minutissimus	minutissimus	(Rossi, 1790)	R. Murao	2012	A. Dawut	22/08/2002	CN	Changji Prov.	CN3	Fukang, alt. 520m, Changji Prov., Xinjiang Uygur Aut. Reg.			M	host: Tamarix sp.	1
BeeCAsia0009240	BeeCAsia 28	28/5/2017	ELKU	BeeCAsia	Nomioides minutissimus minutissimus	Animalia	Arthropoda	Insecta	Hymenoptera	Halictidae	Nomioidinae	Nomioides	minutissimus	minutissimus	(Rossi, 1790)	R. Murao	2012	A. Dawut	22/08/2002	CN	Changji Prov.	CN3	Fukang, alt. 520m, Changji Prov., Xinjiang Uygur Aut. Reg.			M	host: Tamarix sp.	1
BeeCAsia0009241	BeeCAsia 28	28/5/2017	ELKU	BeeCAsia	Nomioides minutissimus minutissimus	Animalia	Arthropoda	Insecta	Hymenoptera	Halictidae	Nomioidinae	Nomioides	minutissimus	minutissimus	(Rossi, 1790)	R. Murao	2012	A. Dawut	22/08/2002	CN	Changji Prov.	CN3	Fukang, alt. 520m, Changji Prov., Xinjiang Uygur Aut. Reg.			M	host: Tamarix sp.	1
BeeCAsia0009242	BeeCAsia 28	28/5/2017	ELKU	BeeCAsia	Nomioides minutissimus minutissimus	Animalia	Arthropoda	Insecta	Hymenoptera	Halictidae	Nomioidinae	Nomioides	minutissimus	minutissimus	(Rossi, 1790)	R. Murao	2012	A. Dawut	22/08/2002	CN	Changji Prov.	CN3	Fukang, alt. 520m, Changji Prov., Xinjiang Uygur Aut. Reg.			M	host: Tamarix sp.	1
BeeCAsia0009243	BeeCAsia 28	28/5/2017	ELKU	BeeCAsia	Nomioides minutissimus minutissimus	Animalia	Arthropoda	Insecta	Hymenoptera	Halictidae	Nomioidinae	Nomioides	minutissimus	minutissimus	(Rossi, 1790)	R. Murao	2012	A. Dawut	22/08/2002	CN	Changji Prov.	CN3	Fukang, alt. 520m, Changji Prov., Xinjiang Uygur Aut. Reg.			M	host: Tamarix sp.	1
BeeCAsia0009244	BeeCAsia 28	28/5/2017	ELKU	BeeCAsia	Nomioides minutissimus minutissimus	Animalia	Arthropoda	Insecta	Hymenoptera	Halictidae	Nomioidinae	Nomioides	minutissimus	minutissimus	(Rossi, 1790)	R. Murao	2012	A. Dawut	22/08/2002	CN	Changji Prov.	CN3	Fukang, alt. 520m, Changji Prov., Xinjiang Uygur Aut. Reg.			M	host: Tamarix sp.	1
BeeCAsia0009245	BeeCAsia 28	28/5/2017	ELKU	BeeCAsia	Nomioides minutissimus minutissimus	Animalia	Arthropoda	Insecta	Hymenoptera	Halictidae	Nomioidinae	Nomioides	minutissimus	minutissimus	(Rossi, 1790)	R. Murao	2012	A. Dawut	22/08/2002	CN	Changji Prov.	CN3	Fukang, alt. 520m, Changji Prov., Xinjiang Uygur Aut. Reg.			M	host: Tamarix sp.	1
BeeCAsia0009246	BeeCAsia 28	28/5/2017	ELKU	BeeCAsia	Nomioides minutissimus minutissimus	Animalia	Arthropoda	Insecta	Hymenoptera	Halictidae	Nomioidinae	Nomioides	minutissimus	minutissimus	(Rossi, 1790)	R. Murao	2012	A. Dawut	22/08/2002	CN	Changji Prov.	CN3	Fukang, alt. 520m, Changji Prov., Xinjiang Uygur Aut. Reg.			M	host: Tamarix sp.	1
BeeCAsia0009247	BeeCAsia 28	28/5/2017	ELKU	BeeCAsia	Nomioides minutissimus minutissimus	Animalia	Arthropoda	Insecta	Hymenoptera	Halictidae	Nomioidinae	Nomioides	minutissimus	minutissimus	(Rossi, 1790)	R. Murao	2012	A. Dawut	22/08/2002	CN	Changji Prov.	CN3	Fukang, alt. 520m, Changji Prov., Xinjiang Uygur Aut. Reg.			M	host: Tamarix sp.	1
BeeCAsia0009248	BeeCAsia 28	28/5/2017	ELKU	BeeCAsia	Nomioides minutissimus minutissimus	Animalia	Arthropoda	Insecta	Hymenoptera	Halictidae	Nomioidinae	Nomioides	minutissimus	minutissimus	(Rossi, 1790)	R. Murao	2012	A. Dawut	22/08/2002	CN	Changji Prov.	CN3	Fukang, alt. 520m, Changji Prov., Xinjiang Uygur Aut. Reg.			M	host: Tamarix sp.	1
BeeCAsia0009249	BeeCAsia 28	28/5/2017	ELKU	BeeCAsia	Nomioides minutissimus minutissimus	Animalia	Arthropoda	Insecta	Hymenoptera	Halictidae	Nomioidinae	Nomioides	minutissimus	minutissimus	(Rossi, 1790)	R. Murao	2012	A. Dawut	22/08/2002	CN	Changji Prov.	CN3	Fukang, alt. 520m, Changji Prov., Xinjiang Uygur Aut. Reg.			M	host: Tamarix sp.	1
BeeCAsia0009250	BeeCAsia 28	28/5/2017	ELKU	BeeCAsia	Nomioides minutissimus minutissimus	Animalia	Arthropoda	Insecta	Hymenoptera	Halictidae	Nomioidinae	Nomioides	minutissimus	minutissimus	(Rossi, 1790)	R. Murao	2012	A. Dawut	22/08/2002	CN	Changji Prov.	CN3	Fukang, alt. 520m, Changji Prov., Xinjiang Uygur Aut. Reg.			M	host: Tamarix sp.	1
BeeCAsia0009251	BeeCAsia 28	28/5/2017	ELKU	BeeCAsia	Nomioides minutissimus minutissimus	Animalia	Arthropoda	Insecta	Hymenoptera	Halictidae	Nomioidinae	Nomioides	minutissimus	minutissimus	(Rossi, 1790)	R. Murao	2012	A. Dawut	22/08/2002	CN	Changji Prov.	CN3	Fukang, alt. 520m, Changji Prov., Xinjiang Uygur Aut. Reg.			M	host: Tamarix sp.	1
BeeCAsia0009252	BeeCAsia 28	28/5/2017	ELKU	BeeCAsia	Nomioides minutissimus minutissimus	Animalia	Arthropoda	Insecta	Hymenoptera	Halictidae	Nomioidinae	Nomioides	minutissimus	minutissimus	(Rossi, 1790)	R. Murao	2012	A. Dawut	22/08/2002	CN	Changji Prov.	CN3	Fukang, alt. 520m, Changji Prov., Xinjiang Uygur Aut. Reg.			M	host: Tamarix sp.	1
BeeCAsia0009253	BeeCAsia 28	28/5/2017	ELKU	BeeCAsia	Nomioides minutissimus minutissimus	Animalia	Arthropoda	Insecta	Hymenoptera	Halictidae	Nomioidinae	Nomioides	minutissimus	minutissimus	(Rossi, 1790)	R. Murao	2012	A. Dawut	22/08/2002	CN	Changji Prov.	CN3	Fukang, alt. 520m, Changji Prov., Xinjiang Uygur Aut. Reg.			M	host: Tamarix sp.	1
BeeCAsia0009254	BeeCAsia 28	28/5/2017	ELKU	BeeCAsia	Nomioides minutissimus minutissimus	Animalia	Arthropoda	Insecta	Hymenoptera	Halictidae	Nomioidinae	Nomioides	minutissimus	minutissimus	(Rossi, 1790)	R. Murao	2012	A. Dawut	22/08/2002	CN	Changji Prov.	CN3	Fukang, alt. 520m, Changji Prov., Xinjiang Uygur Aut. Reg.			M	host: Tamarix sp.	1
BeeCAsia0009255	BeeCAsia 28	28/5/2017	ELKU	BeeCAsia	Nomioides minutissimus minutissimus	Animalia	Arthropoda	Insecta	Hymenoptera	Halictidae	Nomioidinae	Nomioides	minutissimus	minutissimus	(Rossi, 1790)	R. Murao	2012	A. Dawut	22/08/2002	CN	Changji Prov.	CN3	Fukang, alt. 520m, Changji Prov., Xinjiang Uygur Aut. Reg.			M	host: Tamarix sp.	1
BeeCAsia0009256	BeeCAsia 28	28/5/2017	ELKU	BeeCAsia	Nomioides minutissimus minutissimus	Animalia	Arthropoda	Insecta	Hymenoptera	Halictidae	Nomioidinae	Nomioides	minutissimus	minutissimus	(Rossi, 1790)	R. Murao	2012	A. Dawut	22/08/2002	CN	Changji Prov.	CN3	Fukang, alt. 520m, Changji Prov., Xinjiang Uygur Aut. Reg.			M	host: Tamarix sp.	1
BeeCAsia0009257	BeeCAsia 28	28/5/2017	ELKU	BeeCAsia	Nomioides minutissimus minutissimus	Animalia	Arthropoda	Insecta	Hymenoptera	Halictidae	Nomioidinae	Nomioides	minutissimus	minutissimus	(Rossi, 1790)	R. Murao	2012	A. Dawut	22/08/2002	CN	Changji Prov.	CN3	Fukang, alt. 520m, Changji Prov., Xinjiang Uygur Aut. Reg.			M	host: Tamarix sp.	1
BeeCAsia0009258	BeeCAsia 28	28/5/2017	ELKU	BeeCAsia	Nomioides minutissimus minutissimus	Animalia	Arthropoda	Insecta	Hymenoptera	Halictidae	Nomioidinae	Nomioides	minutissimus	minutissimus	(Rossi, 1790)	R. Murao	2012	A. Dawut	22/08/2002	CN	Changji Prov.	CN3	Fukang, alt. 520m, Changji Prov., Xinjiang Uygur Aut. Reg.			M	host: Tamarix sp.	1
BeeCAsia0009314	BeeCAsia 28	28/5/2017	ELKU	BeeCAsia	Nomioides gussakouskiji	Animalia	Arthropoda	Insecta	Hymenoptera	Halictidae	Nomioidinae	Nomioides	gussakouskiji		Blüthgen, 1933	R. Murao	2012	A. Dawut	22/08/2002	CN	Changji Prov.	CN3	Fukang, alt. 520m, Changji Prov., Xinjiang Uygur Aut. Reg.			M	host: Tamarix sp.	1
BeeCAsia0009315	BeeCAsia 28	28/5/2017	ELKU	BeeCAsia	Nomioides gussakouskiji	Animalia	Arthropoda	Insecta	Hymenoptera	Halictidae	Nomioidinae	Nomioides	gussakouskiji		Blüthgen, 1933	R. Murao	2012	A. Dawut	22/08/2002	CN	Changji Prov.	CN3	Fukang, alt. 520m, Changji Prov., Xinjiang Uygur Aut. Reg.			M	host: Tamarix sp.	1
BeeCAsia0009182	BeeCAsia 28	28/5/2017	ELKU	BeeCAsia	Nomioides minutissimus minutissimus	Animalia	Arthropoda	Insecta	Hymenoptera	Halictidae	Nomioidinae	Nomioides	minutissimus	minutissimus	(Rossi, 1790)	R. Murao	2012	O. Tadauchi	22/08/2002	CN	Changji Prov.	CN3	Fukang, alt. 520m, Changji Prov., Xinjiang Uygur Aut. Reg.			M	host: Tamarix sp.	1
BeeCAsia0009183	BeeCAsia 28	28/5/2017	ELKU	BeeCAsia	Nomioides minutissimus minutissimus	Animalia	Arthropoda	Insecta	Hymenoptera	Halictidae	Nomioidinae	Nomioides	minutissimus	minutissimus	(Rossi, 1790)	R. Murao	2012	O. Tadauchi	22/08/2002	CN	Changji Prov.	CN3	Fukang, alt. 520m, Changji Prov., Xinjiang Uygur Aut. Reg.			M	host: Tamarix sp.	1
BeeCAsia0009184	BeeCAsia 28	28/5/2017	ELKU	BeeCAsia	Nomioides minutissimus minutissimus	Animalia	Arthropoda	Insecta	Hymenoptera	Halictidae	Nomioidinae	Nomioides	minutissimus	minutissimus	(Rossi, 1790)	R. Murao	2012	O. Tadauchi	22/08/2002	CN	Changji Prov.	CN3	Fukang, alt. 520m, Changji Prov., Xinjiang Uygur Aut. Reg.			M	host: Tamarix sp.	1
BeeCAsia0009202	BeeCAsia 28	28/5/2017	ELKU	BeeCAsia	Nomioides minutissimus minutissimus	Animalia	Arthropoda	Insecta	Hymenoptera	Halictidae	Nomioidinae	Nomioides	minutissimus	minutissimus	(Rossi, 1790)	R. Murao	2012	O. Tadauchi	22/08/2002	CN	Changji Prov.	CN3	Fukang, alt. 520m, Changji Prov., Xinjiang Uygur Aut. Reg.			M	host: Tamarix sp.	1
BeeCAsia0009203	BeeCAsia 28	28/5/2017	ELKU	BeeCAsia	Nomioides minutissimus minutissimus	Animalia	Arthropoda	Insecta	Hymenoptera	Halictidae	Nomioidinae	Nomioides	minutissimus	minutissimus	(Rossi, 1790)	R. Murao	2012	O. Tadauchi	22/08/2002	CN	Changji Prov.	CN3	Fukang, alt. 520m, Changji Prov., Xinjiang Uygur Aut. Reg.			M	host: Tamarix sp.	1
BeeCAsia0009204	BeeCAsia 28	28/5/2017	ELKU	BeeCAsia	Nomioides minutissimus minutissimus	Animalia	Arthropoda	Insecta	Hymenoptera	Halictidae	Nomioidinae	Nomioides	minutissimus	minutissimus	(Rossi, 1790)	R. Murao	2012	O. Tadauchi	22/08/2002	CN	Changji Prov.	CN3	Fukang, alt. 520m, Changji Prov., Xinjiang Uygur Aut. Reg.			M	host: Tamarix sp.	1
BeeCAsia0009205	BeeCAsia 28	28/5/2017	ELKU	BeeCAsia	Nomioides minutissimus minutissimus	Animalia	Arthropoda	Insecta	Hymenoptera	Halictidae	Nomioidinae	Nomioides	minutissimus	minutissimus	(Rossi, 1790)	R. Murao	2012	O. Tadauchi	22/08/2002	CN	Changji Prov.	CN3	Fukang, alt. 520m, Changji Prov., Xinjiang Uygur Aut. Reg.			M	host: Tamarix sp.	1
BeeCAsia0009206	BeeCAsia 28	28/5/2017	ELKU	BeeCAsia	Nomioides minutissimus minutissimus	Animalia	Arthropoda	Insecta	Hymenoptera	Halictidae	Nomioidinae	Nomioides	minutissimus	minutissimus	(Rossi, 1790)	R. Murao	2012	O. Tadauchi	22/08/2002	CN	Changji Prov.	CN3	Fukang, alt. 520m, Changji Prov., Xinjiang Uygur Aut. Reg.			M	host: Tamarix sp.	1
BeeCAsia0009207	BeeCAsia 28	28/5/2017	ELKU	BeeCAsia	Nomioides minutissimus minutissimus	Animalia	Arthropoda	Insecta	Hymenoptera	Halictidae	Nomioidinae	Nomioides	minutissimus	minutissimus	(Rossi, 1790)	R. Murao	2012	O. Tadauchi	22/08/2002	CN	Changji Prov.	CN3	Fukang, alt. 520m, Changji Prov., Xinjiang Uygur Aut. Reg.			M	host: Tamarix sp.	1
BeeCAsia0009208	BeeCAsia 28	28/5/2017	ELKU	BeeCAsia	Nomioides minutissimus minutissimus	Animalia	Arthropoda	Insecta	Hymenoptera	Halictidae	Nomioidinae	Nomioides	minutissimus	minutissimus	(Rossi, 1790)	R. Murao	2012	O. Tadauchi	22/08/2002	CN	Changji Prov.	CN3	Fukang, alt. 520m, Changji Prov., Xinjiang Uygur Aut. Reg.			M	host: Tamarix sp.	1
BeeCAsia0009209	BeeCAsia 28	28/5/2017	ELKU	BeeCAsia	Nomioides minutissimus minutissimus	Animalia	Arthropoda	Insecta	Hymenoptera	Halictidae	Nomioidinae	Nomioides	minutissimus	minutissimus	(Rossi, 1790)	R. Murao	2012	O. Tadauchi	22/08/2002	CN	Changji Prov.	CN3	Fukang, alt. 520m, Changji Prov., Xinjiang Uygur Aut. Reg.			M	host: Tamarix sp.	1
BeeCAsia0009210	BeeCAsia 28	28/5/2017	ELKU	BeeCAsia	Nomioides minutissimus minutissimus	Animalia	Arthropoda	Insecta	Hymenoptera	Halictidae	Nomioidinae	Nomioides	minutissimus	minutissimus	(Rossi, 1790)	R. Murao	2012	O. Tadauchi	22/08/2002	CN	Changji Prov.	CN3	Fukang, alt. 520m, Changji Prov., Xinjiang Uygur Aut. Reg.			M	host: Tamarix sp.	1
BeeCAsia0009211	BeeCAsia 28	28/5/2017	ELKU	BeeCAsia	Nomioides minutissimus minutissimus	Animalia	Arthropoda	Insecta	Hymenoptera	Halictidae	Nomioidinae	Nomioides	minutissimus	minutissimus	(Rossi, 1790)	R. Murao	2012	O. Tadauchi	22/08/2002	CN	Changji Prov.	CN3	Fukang, alt. 520m, Changji Prov., Xinjiang Uygur Aut. Reg.			M	host: Tamarix sp.	1
BeeCAsia0009212	BeeCAsia 28	28/5/2017	ELKU	BeeCAsia	Nomioides minutissimus minutissimus	Animalia	Arthropoda	Insecta	Hymenoptera	Halictidae	Nomioidinae	Nomioides	minutissimus	minutissimus	(Rossi, 1790)	R. Murao	2012	O. Tadauchi	22/08/2002	CN	Changji Prov.	CN3	Fukang, alt. 520m, Changji Prov., Xinjiang Uygur Aut. Reg.			M	host: Tamarix sp.	1
BeeCAsia0009213	BeeCAsia 28	28/5/2017	ELKU	BeeCAsia	Nomioides minutissimus minutissimus	Animalia	Arthropoda	Insecta	Hymenoptera	Halictidae	Nomioidinae	Nomioides	minutissimus	minutissimus	(Rossi, 1790)	R. Murao	2012	O. Tadauchi	22/08/2002	CN	Changji Prov.	CN3	Fukang, alt. 520m, Changji Prov., Xinjiang Uygur Aut. Reg.			M	host: Tamarix sp.	1
BeeCAsia0009214	BeeCAsia 28	28/5/2017	ELKU	BeeCAsia	Nomioides minutissimus minutissimus	Animalia	Arthropoda	Insecta	Hymenoptera	Halictidae	Nomioidinae	Nomioides	minutissimus	minutissimus	(Rossi, 1790)	R. Murao	2012	O. Tadauchi	22/08/2002	CN	Changji Prov.	CN3	Fukang, alt. 520m, Changji Prov., Xinjiang Uygur Aut. Reg.			M	host: Tamarix sp.	1
BeeCAsia0009215	BeeCAsia 28	28/5/2017	ELKU	BeeCAsia	Nomioides minutissimus minutissimus	Animalia	Arthropoda	Insecta	Hymenoptera	Halictidae	Nomioidinae	Nomioides	minutissimus	minutissimus	(Rossi, 1790)	R. Murao	2012	O. Tadauchi	22/08/2002	CN	Changji Prov.	CN3	Fukang, alt. 520m, Changji Prov., Xinjiang Uygur Aut. Reg.			M	host: Tamarix sp.	1
BeeCAsia0009216	BeeCAsia 28	28/5/2017	ELKU	BeeCAsia	Nomioides minutissimus minutissimus	Animalia	Arthropoda	Insecta	Hymenoptera	Halictidae	Nomioidinae	Nomioides	minutissimus	minutissimus	(Rossi, 1790)	R. Murao	2012	O. Tadauchi	22/08/2002	CN	Changji Prov.	CN3	Fukang, alt. 520m, Changji Prov., Xinjiang Uygur Aut. Reg.			M	host: Tamarix sp.	1
BeeCAsia0009217	BeeCAsia 28	28/5/2017	ELKU	BeeCAsia	Nomioides minutissimus minutissimus	Animalia	Arthropoda	Insecta	Hymenoptera	Halictidae	Nomioidinae	Nomioides	minutissimus	minutissimus	(Rossi, 1790)	R. Murao	2012	O. Tadauchi	22/08/2002	CN	Changji Prov.	CN3	Fukang, alt. 520m, Changji Prov., Xinjiang Uygur Aut. Reg.			M	host: Tamarix sp.	1
BeeCAsia0009218	BeeCAsia 28	28/5/2017	ELKU	BeeCAsia	Nomioides minutissimus minutissimus	Animalia	Arthropoda	Insecta	Hymenoptera	Halictidae	Nomioidinae	Nomioides	minutissimus	minutissimus	(Rossi, 1790)	R. Murao	2012	O. Tadauchi	22/08/2002	CN	Changji Prov.	CN3	Fukang, alt. 520m, Changji Prov., Xinjiang Uygur Aut. Reg.			M	host: Tamarix sp.	1
BeeCAsia0009219	BeeCAsia 28	28/5/2017	ELKU	BeeCAsia	Nomioides minutissimus minutissimus	Animalia	Arthropoda	Insecta	Hymenoptera	Halictidae	Nomioidinae	Nomioides	minutissimus	minutissimus	(Rossi, 1790)	R. Murao	2012	O. Tadauchi	22/08/2002	CN	Changji Prov.	CN3	Fukang, alt. 520m, Changji Prov., Xinjiang Uygur Aut. Reg.			M	host: Tamarix sp.	1
BeeCAsia0009220	BeeCAsia 28	28/5/2017	ELKU	BeeCAsia	Nomioides minutissimus minutissimus	Animalia	Arthropoda	Insecta	Hymenoptera	Halictidae	Nomioidinae	Nomioides	minutissimus	minutissimus	(Rossi, 1790)	R. Murao	2012	O. Tadauchi	22/08/2002	CN	Changji Prov.	CN3	Fukang, alt. 520m, Changji Prov., Xinjiang Uygur Aut. Reg.			M	host: Tamarix sp.	1
BeeCAsia0009221	BeeCAsia 28	28/5/2017	ELKU	BeeCAsia	Nomioides minutissimus minutissimus	Animalia	Arthropoda	Insecta	Hymenoptera	Halictidae	Nomioidinae	Nomioides	minutissimus	minutissimus	(Rossi, 1790)	R. Murao	2012	O. Tadauchi	22/08/2002	CN	Changji Prov.	CN3	Fukang, alt. 520m, Changji Prov., Xinjiang Uygur Aut. Reg.			M	host: Tamarix sp.	1
BeeCAsia0009222	BeeCAsia 28	28/5/2017	ELKU	BeeCAsia	Nomioides minutissimus minutissimus	Animalia	Arthropoda	Insecta	Hymenoptera	Halictidae	Nomioidinae	Nomioides	minutissimus	minutissimus	(Rossi, 1790)	R. Murao	2012	O. Tadauchi	22/08/2002	CN	Changji Prov.	CN3	Fukang, alt. 520m, Changji Prov., Xinjiang Uygur Aut. Reg.			M	host: Tamarix sp.	1
BeeCAsia0009223	BeeCAsia 28	28/5/2017	ELKU	BeeCAsia	Nomioides minutissimus minutissimus	Animalia	Arthropoda	Insecta	Hymenoptera	Halictidae	Nomioidinae	Nomioides	minutissimus	minutissimus	(Rossi, 1790)	R. Murao	2012	O. Tadauchi	22/08/2002	CN	Changji Prov.	CN3	Fukang, alt. 520m, Changji Prov., Xinjiang Uygur Aut. Reg.			M	host: Tamarix sp.	1
BeeCAsia0009224	BeeCAsia 28	28/5/2017	ELKU	BeeCAsia	Nomioides minutissimus minutissimus	Animalia	Arthropoda	Insecta	Hymenoptera	Halictidae	Nomioidinae	Nomioides	minutissimus	minutissimus	(Rossi, 1790)	R. Murao	2012	O. Tadauchi	22/08/2002	CN	Changji Prov.	CN3	Fukang, alt. 520m, Changji Prov., Xinjiang Uygur Aut. Reg.			M	host: Tamarix sp.	1
BeeCAsia0009225	BeeCAsia 28	28/5/2017	ELKU	BeeCAsia	Nomioides minutissimus minutissimus	Animalia	Arthropoda	Insecta	Hymenoptera	Halictidae	Nomioidinae	Nomioides	minutissimus	minutissimus	(Rossi, 1790)	R. Murao	2012	O. Tadauchi	22/08/2002	CN	Changji Prov.	CN3	Fukang, alt. 520m, Changji Prov., Xinjiang Uygur Aut. Reg.			M	host: Tamarix sp.	1
BeeCAsia0009226	BeeCAsia 28	28/5/2017	ELKU	BeeCAsia	Nomioides minutissimus minutissimus	Animalia	Arthropoda	Insecta	Hymenoptera	Halictidae	Nomioidinae	Nomioides	minutissimus	minutissimus	(Rossi, 1790)	R. Murao	2012	O. Tadauchi	22/08/2002	CN	Changji Prov.	CN3	Fukang, alt. 520m, Changji Prov., Xinjiang Uygur Aut. Reg.			M	host: Tamarix sp.	1
BeeCAsia0009227	BeeCAsia 28	28/5/2017	ELKU	BeeCAsia	Nomioides minutissimus minutissimus	Animalia	Arthropoda	Insecta	Hymenoptera	Halictidae	Nomioidinae	Nomioides	minutissimus	minutissimus	(Rossi, 1790)	R. Murao	2012	O. Tadauchi	22/08/2002	CN	Changji Prov.	CN3	Fukang, alt. 520m, Changji Prov., Xinjiang Uygur Aut. Reg.			M	host: Tamarix sp.	1
BeeCAsia0009228	BeeCAsia 28	28/5/2017	ELKU	BeeCAsia	Nomioides minutissimus minutissimus	Animalia	Arthropoda	Insecta	Hymenoptera	Halictidae	Nomioidinae	Nomioides	minutissimus	minutissimus	(Rossi, 1790)	R. Murao	2012	O. Tadauchi	22/08/2002	CN	Changji Prov.	CN3	Fukang, alt. 520m, Changji Prov., Xinjiang Uygur Aut. Reg.			M	host: Tamarix sp.	1
BeeCAsia0009229	BeeCAsia 28	28/5/2017	ELKU	BeeCAsia	Nomioides minutissimus minutissimus	Animalia	Arthropoda	Insecta	Hymenoptera	Halictidae	Nomioidinae	Nomioides	minutissimus	minutissimus	(Rossi, 1790)	R. Murao	2012	O. Tadauchi	22/08/2002	CN	Changji Prov.	CN3	Fukang, alt. 520m, Changji Prov., Xinjiang Uygur Aut. Reg.			M	host: Tamarix sp.	1
BeeCAsia0009230	BeeCAsia 28	28/5/2017	ELKU	BeeCAsia	Nomioides minutissimus minutissimus	Animalia	Arthropoda	Insecta	Hymenoptera	Halictidae	Nomioidinae	Nomioides	minutissimus	minutissimus	(Rossi, 1790)	R. Murao	2012	O. Tadauchi	22/08/2002	CN	Changji Prov.	CN3	Fukang, alt. 520m, Changji Prov., Xinjiang Uygur Aut. Reg.			M	host: Tamarix sp.	1
BeeCAsia0009231	BeeCAsia 28	28/5/2017	ELKU	BeeCAsia	Nomioides minutissimus minutissimus	Animalia	Arthropoda	Insecta	Hymenoptera	Halictidae	Nomioidinae	Nomioides	minutissimus	minutissimus	(Rossi, 1790)	R. Murao	2012	O. Tadauchi	22/08/2002	CN	Changji Prov.	CN3	Fukang, alt. 520m, Changji Prov., Xinjiang Uygur Aut. Reg.			M	host: Tamarix sp.	1
BeeCAsia0009232	BeeCAsia 28	28/5/2017	ELKU	BeeCAsia	Nomioides minutissimus minutissimus	Animalia	Arthropoda	Insecta	Hymenoptera	Halictidae	Nomioidinae	Nomioides	minutissimus	minutissimus	(Rossi, 1790)	R. Murao	2012	O. Tadauchi	22/08/2002	CN	Changji Prov.	CN3	Fukang, alt. 520m, Changji Prov., Xinjiang Uygur Aut. Reg.			M	host: Tamarix sp.	1
BeeCAsia0009306	BeeCAsia 28	28/5/2017	ELKU	BeeCAsia	Nomioides minutissimus minutissimus	Animalia	Arthropoda	Insecta	Hymenoptera	Halictidae	Nomioidinae	Nomioides	minutissimus	minutissimus	(Rossi, 1790)	R. Murao	2012	O. Tadauchi	22/08/2002	CN	Changji Prov.	CN3	Fukang, alt. 520m, Changji Prov., Xinjiang Uygur Aut. Reg.			F	host: Tamarix sp.	1
BeeCAsia0009307	BeeCAsia 28	28/5/2017	ELKU	BeeCAsia	Nomioides minutissimus minutissimus	Animalia	Arthropoda	Insecta	Hymenoptera	Halictidae	Nomioidinae	Nomioides	minutissimus	minutissimus	(Rossi, 1790)	R. Murao	2012	O. Tadauchi	22/08/2002	CN	Changji Prov.	CN3	Fukang, alt. 520m, Changji Prov., Xinjiang Uygur Aut. Reg.			F	host: Tamarix sp.	1
BeeCAsia0009317	BeeCAsia 28	28/5/2017	ELKU	BeeCAsia	Nomioides gussakouskiji	Animalia	Arthropoda	Insecta	Hymenoptera	Halictidae	Nomioidinae	Nomioides	gussakouskiji		Blüthgen, 1933	R. Murao	2012	O. Tadauchi	22/08/2002	CN	Changji Prov.	CN3	Fukang, alt. 520m, Changji Prov., Xinjiang Uygur Aut. Reg.			M	host: Tamarix sp.	1
BeeCAsia0009185	BeeCAsia 28	28/5/2017	ELKU	BeeCAsia	Nomioides minutissimus minutissimus	Animalia	Arthropoda	Insecta	Hymenoptera	Halictidae	Nomioidinae	Nomioides	minutissimus	minutissimus	(Rossi, 1790)	R. Murao	2012	R. Murao	22/08/2002	CN	Changji Prov.	CN3	Fukang, alt. 520m, Changji Prov., Xinjiang Uygur Aut. Reg.			M	host: Tamarix sp.	1
BeeCAsia0009186	BeeCAsia 28	28/5/2017	ELKU	BeeCAsia	Nomioides minutissimus minutissimus	Animalia	Arthropoda	Insecta	Hymenoptera	Halictidae	Nomioidinae	Nomioides	minutissimus	minutissimus	(Rossi, 1790)	R. Murao	2012	R. Murao	22/08/2002	CN	Changji Prov.	CN3	Fukang, alt. 520m, Changji Prov., Xinjiang Uygur Aut. Reg.			M	host: Tamarix sp.	1
BeeCAsia0009187	BeeCAsia 28	28/5/2017	ELKU	BeeCAsia	Nomioides minutissimus minutissimus	Animalia	Arthropoda	Insecta	Hymenoptera	Halictidae	Nomioidinae	Nomioides	minutissimus	minutissimus	(Rossi, 1790)	R. Murao	2012	R. Murao	22/08/2002	CN	Changji Prov.	CN3	Fukang, alt. 520m, Changji Prov., Xinjiang Uygur Aut. Reg.			M	host: Tamarix sp.	1
BeeCAsia0009188	BeeCAsia 28	28/5/2017	ELKU	BeeCAsia	Nomioides minutissimus minutissimus	Animalia	Arthropoda	Insecta	Hymenoptera	Halictidae	Nomioidinae	Nomioides	minutissimus	minutissimus	(Rossi, 1790)	R. Murao	2012	R. Murao	22/08/2002	CN	Changji Prov.	CN3	Fukang, alt. 520m, Changji Prov., Xinjiang Uygur Aut. Reg.			M	host: Tamarix sp.	1
BeeCAsia0009189	BeeCAsia 28	28/5/2017	ELKU	BeeCAsia	Nomioides minutissimus minutissimus	Animalia	Arthropoda	Insecta	Hymenoptera	Halictidae	Nomioidinae	Nomioides	minutissimus	minutissimus	(Rossi, 1790)	R. Murao	2012	R. Murao	22/08/2002	CN	Changji Prov.	CN3	Fukang, alt. 520m, Changji Prov., Xinjiang Uygur Aut. Reg.			M	host: Tamarix sp.	1
BeeCAsia0009190	BeeCAsia 28	28/5/2017	ELKU	BeeCAsia	Nomioides minutissimus minutissimus	Animalia	Arthropoda	Insecta	Hymenoptera	Halictidae	Nomioidinae	Nomioides	minutissimus	minutissimus	(Rossi, 1790)	R. Murao	2012	R. Murao	22/08/2002	CN	Changji Prov.	CN3	Fukang, alt. 520m, Changji Prov., Xinjiang Uygur Aut. Reg.			M	host: Tamarix sp.	1
BeeCAsia0009192	BeeCAsia 28	28/5/2017	ELKU	BeeCAsia	Nomioides minutissimus minutissimus	Animalia	Arthropoda	Insecta	Hymenoptera	Halictidae	Nomioidinae	Nomioides	minutissimus	minutissimus	(Rossi, 1790)	R. Murao	2012	R. Murao	22/08/2002	CN	Changji Prov.	CN3	Fukang, alt. 520m, Changji Prov., Xinjiang Uygur Aut. Reg.			M	host: Tamarix sp.	1
BeeCAsia0009193	BeeCAsia 28	28/5/2017	ELKU	BeeCAsia	Nomioides minutissimus minutissimus	Animalia	Arthropoda	Insecta	Hymenoptera	Halictidae	Nomioidinae	Nomioides	minutissimus	minutissimus	(Rossi, 1790)	R. Murao	2012	R. Murao	22/08/2002	CN	Changji Prov.	CN3	Fukang, alt. 520m, Changji Prov., Xinjiang Uygur Aut. Reg.			M	host: Tamarix sp.	1
BeeCAsia0009194	BeeCAsia 28	28/5/2017	ELKU	BeeCAsia	Nomioides minutissimus minutissimus	Animalia	Arthropoda	Insecta	Hymenoptera	Halictidae	Nomioidinae	Nomioides	minutissimus	minutissimus	(Rossi, 1790)	R. Murao	2012	R. Murao	22/08/2002	CN	Changji Prov.	CN3	Fukang, alt. 520m, Changji Prov., Xinjiang Uygur Aut. Reg.			M	host: Tamarix sp.	1
BeeCAsia0009195	BeeCAsia 28	28/5/2017	ELKU	BeeCAsia	Nomioides minutissimus minutissimus	Animalia	Arthropoda	Insecta	Hymenoptera	Halictidae	Nomioidinae	Nomioides	minutissimus	minutissimus	(Rossi, 1790)	R. Murao	2012	R. Murao	22/08/2002	CN	Changji Prov.	CN3	Fukang, alt. 520m, Changji Prov., Xinjiang Uygur Aut. Reg.			M	host: Tamarix sp.	1
BeeCAsia0009201	BeeCAsia 28	28/5/2017	ELKU	BeeCAsia	Nomioides minutissimus minutissimus	Animalia	Arthropoda	Insecta	Hymenoptera	Halictidae	Nomioidinae	Nomioides	minutissimus	minutissimus	(Rossi, 1790)	R. Murao	2012	R. Murao	22/08/2002	CN	Changji Prov.	CN3	Fukang, alt. 520m, Changji Prov., Xinjiang Uygur Aut. Reg.			M	host: Tamarix sp.	1
BeeCAsia0009233	BeeCAsia 28	28/5/2017	ELKU	BeeCAsia	Nomioides minutissimus minutissimus	Animalia	Arthropoda	Insecta	Hymenoptera	Halictidae	Nomioidinae	Nomioides	minutissimus	minutissimus	(Rossi, 1790)	R. Murao	2012	R. Murao	22/08/2002	CN	Changji Prov.	CN3	Fukang, alt. 520m, Changji Prov., Xinjiang Uygur Aut. Reg.			M	host: Tamarix sp.	1
BeeCAsia0009259	BeeCAsia 28	28/5/2017	ELKU	BeeCAsia	Nomioides minutissimus minutissimus	Animalia	Arthropoda	Insecta	Hymenoptera	Halictidae	Nomioidinae	Nomioides	minutissimus	minutissimus	(Rossi, 1790)	R. Murao	2012	R. Murao	22/08/2002	CN	Changji Prov.	CN3	Fukang, alt. 520m, Changji Prov., Xinjiang Uygur Aut. Reg.			M	host: Tamarix sp.	1
BeeCAsia0009261	BeeCAsia 28	28/5/2017	ELKU	BeeCAsia	Nomioides minutissimus minutissimus	Animalia	Arthropoda	Insecta	Hymenoptera	Halictidae	Nomioidinae	Nomioides	minutissimus	minutissimus	(Rossi, 1790)	R. Murao	2012	R. Murao	22/08/2002	CN	Changji Prov.	CN3	Fukang, alt. 520m, Changji Prov., Xinjiang Uygur Aut. Reg.			M	host: Tamarix sp.	1
BeeCAsia0009262	BeeCAsia 28	28/5/2017	ELKU	BeeCAsia	Nomioides minutissimus minutissimus	Animalia	Arthropoda	Insecta	Hymenoptera	Halictidae	Nomioidinae	Nomioides	minutissimus	minutissimus	(Rossi, 1790)	R. Murao	2012	R. Murao	22/08/2002	CN	Changji Prov.	CN3	Fukang, alt. 520m, Changji Prov., Xinjiang Uygur Aut. Reg.			M	host: Tamarix sp.	1
BeeCAsia0009263	BeeCAsia 28	28/5/2017	ELKU	BeeCAsia	Nomioides minutissimus minutissimus	Animalia	Arthropoda	Insecta	Hymenoptera	Halictidae	Nomioidinae	Nomioides	minutissimus	minutissimus	(Rossi, 1790)	R. Murao	2012	R. Murao	22/08/2002	CN	Changji Prov.	CN3	Fukang, alt. 520m, Changji Prov., Xinjiang Uygur Aut. Reg.			M	host: Tamarix sp.	1
BeeCAsia0009264	BeeCAsia 28	28/5/2017	ELKU	BeeCAsia	Nomioides minutissimus minutissimus	Animalia	Arthropoda	Insecta	Hymenoptera	Halictidae	Nomioidinae	Nomioides	minutissimus	minutissimus	(Rossi, 1790)	R. Murao	2012	R. Murao	22/08/2002	CN	Changji Prov.	CN3	Fukang, alt. 520m, Changji Prov., Xinjiang Uygur Aut. Reg.			M	host: Tamarix sp.	1
BeeCAsia0009265	BeeCAsia 28	28/5/2017	ELKU	BeeCAsia	Nomioides minutissimus minutissimus	Animalia	Arthropoda	Insecta	Hymenoptera	Halictidae	Nomioidinae	Nomioides	minutissimus	minutissimus	(Rossi, 1790)	R. Murao	2012	R. Murao	22/08/2002	CN	Changji Prov.	CN3	Fukang, alt. 520m, Changji Prov., Xinjiang Uygur Aut. Reg.			M	host: Tamarix sp.	1
BeeCAsia0009266	BeeCAsia 28	28/5/2017	ELKU	BeeCAsia	Nomioides minutissimus minutissimus	Animalia	Arthropoda	Insecta	Hymenoptera	Halictidae	Nomioidinae	Nomioides	minutissimus	minutissimus	(Rossi, 1790)	R. Murao	2012	R. Murao	22/08/2002	CN	Changji Prov.	CN3	Fukang, alt. 520m, Changji Prov., Xinjiang Uygur Aut. Reg.			M	host: Tamarix sp.	1
BeeCAsia0009267	BeeCAsia 28	28/5/2017	ELKU	BeeCAsia	Nomioides minutissimus minutissimus	Animalia	Arthropoda	Insecta	Hymenoptera	Halictidae	Nomioidinae	Nomioides	minutissimus	minutissimus	(Rossi, 1790)	R. Murao	2012	R. Murao	22/08/2002	CN	Changji Prov.	CN3	Fukang, alt. 520m, Changji Prov., Xinjiang Uygur Aut. Reg.			M	host: Tamarix sp.	1
BeeCAsia0009268	BeeCAsia 28	28/5/2017	ELKU	BeeCAsia	Nomioides minutissimus minutissimus	Animalia	Arthropoda	Insecta	Hymenoptera	Halictidae	Nomioidinae	Nomioides	minutissimus	minutissimus	(Rossi, 1790)	R. Murao	2012	R. Murao	22/08/2002	CN	Changji Prov.	CN3	Fukang, alt. 520m, Changji Prov., Xinjiang Uygur Aut. Reg.			M	host: Tamarix sp.	1
BeeCAsia0009269	BeeCAsia 28	28/5/2017	ELKU	BeeCAsia	Nomioides minutissimus minutissimus	Animalia	Arthropoda	Insecta	Hymenoptera	Halictidae	Nomioidinae	Nomioides	minutissimus	minutissimus	(Rossi, 1790)	R. Murao	2012	R. Murao	22/08/2002	CN	Changji Prov.	CN3	Fukang, alt. 520m, Changji Prov., Xinjiang Uygur Aut. Reg.			M	host: Tamarix sp.	1
BeeCAsia0009270	BeeCAsia 28	28/5/2017	ELKU	BeeCAsia	Nomioides minutissimus minutissimus	Animalia	Arthropoda	Insecta	Hymenoptera	Halictidae	Nomioidinae	Nomioides	minutissimus	minutissimus	(Rossi, 1790)	R. Murao	2012	R. Murao	22/08/2002	CN	Changji Prov.	CN3	Fukang, alt. 520m, Changji Prov., Xinjiang Uygur Aut. Reg.			M	host: Tamarix sp.	1
BeeCAsia0009271	BeeCAsia 28	28/5/2017	ELKU	BeeCAsia	Nomioides minutissimus minutissimus	Animalia	Arthropoda	Insecta	Hymenoptera	Halictidae	Nomioidinae	Nomioides	minutissimus	minutissimus	(Rossi, 1790)	R. Murao	2012	R. Murao	22/08/2002	CN	Changji Prov.	CN3	Fukang, alt. 520m, Changji Prov., Xinjiang Uygur Aut. Reg.			M	host: Tamarix sp.	1
BeeCAsia0009272	BeeCAsia 28	28/5/2017	ELKU	BeeCAsia	Nomioides minutissimus minutissimus	Animalia	Arthropoda	Insecta	Hymenoptera	Halictidae	Nomioidinae	Nomioides	minutissimus	minutissimus	(Rossi, 1790)	R. Murao	2012	R. Murao	22/08/2002	CN	Changji Prov.	CN3	Fukang, alt. 520m, Changji Prov., Xinjiang Uygur Aut. Reg.			M	host: Tamarix sp.	1
BeeCAsia0009273	BeeCAsia 28	28/5/2017	ELKU	BeeCAsia	Nomioides minutissimus minutissimus	Animalia	Arthropoda	Insecta	Hymenoptera	Halictidae	Nomioidinae	Nomioides	minutissimus	minutissimus	(Rossi, 1790)	R. Murao	2012	R. Murao	22/08/2002	CN	Changji Prov.	CN3	Fukang, alt. 520m, Changji Prov., Xinjiang Uygur Aut. Reg.			M	host: Tamarix sp.	1
BeeCAsia0009274	BeeCAsia 28	28/5/2017	ELKU	BeeCAsia	Nomioides minutissimus minutissimus	Animalia	Arthropoda	Insecta	Hymenoptera	Halictidae	Nomioidinae	Nomioides	minutissimus	minutissimus	(Rossi, 1790)	R. Murao	2012	R. Murao	22/08/2002	CN	Changji Prov.	CN3	Fukang, alt. 520m, Changji Prov., Xinjiang Uygur Aut. Reg.			M	host: Tamarix sp.	1
BeeCAsia0009275	BeeCAsia 28	28/5/2017	ELKU	BeeCAsia	Nomioides minutissimus minutissimus	Animalia	Arthropoda	Insecta	Hymenoptera	Halictidae	Nomioidinae	Nomioides	minutissimus	minutissimus	(Rossi, 1790)	R. Murao	2012	R. Murao	22/08/2002	CN	Changji Prov.	CN3	Fukang, alt. 520m, Changji Prov., Xinjiang Uygur Aut. Reg.			M	host: Tamarix sp.	1
BeeCAsia0009276	BeeCAsia 28	28/5/2017	ELKU	BeeCAsia	Nomioides minutissimus minutissimus	Animalia	Arthropoda	Insecta	Hymenoptera	Halictidae	Nomioidinae	Nomioides	minutissimus	minutissimus	(Rossi, 1790)	R. Murao	2012	R. Murao	22/08/2002	CN	Changji Prov.	CN3	Fukang, alt. 520m, Changji Prov., Xinjiang Uygur Aut. Reg.			M	host: Tamarix sp.	1
BeeCAsia0009277	BeeCAsia 28	28/5/2017	ELKU	BeeCAsia	Nomioides minutissimus minutissimus	Animalia	Arthropoda	Insecta	Hymenoptera	Halictidae	Nomioidinae	Nomioides	minutissimus	minutissimus	(Rossi, 1790)	R. Murao	2012	R. Murao	22/08/2002	CN	Changji Prov.	CN3	Fukang, alt. 520m, Changji Prov., Xinjiang Uygur Aut. Reg.			M	host: Tamarix sp.	1
BeeCAsia0009278	BeeCAsia 28	28/5/2017	ELKU	BeeCAsia	Nomioides minutissimus minutissimus	Animalia	Arthropoda	Insecta	Hymenoptera	Halictidae	Nomioidinae	Nomioides	minutissimus	minutissimus	(Rossi, 1790)	R. Murao	2012	R. Murao	22/08/2002	CN	Changji Prov.	CN3	Fukang, alt. 520m, Changji Prov., Xinjiang Uygur Aut. Reg.			M	host: Tamarix sp.	1
BeeCAsia0009279	BeeCAsia 28	28/5/2017	ELKU	BeeCAsia	Nomioides minutissimus minutissimus	Animalia	Arthropoda	Insecta	Hymenoptera	Halictidae	Nomioidinae	Nomioides	minutissimus	minutissimus	(Rossi, 1790)	R. Murao	2012	R. Murao	22/08/2002	CN	Changji Prov.	CN3	Fukang, alt. 520m, Changji Prov., Xinjiang Uygur Aut. Reg.			M	host: Tamarix sp.	1
BeeCAsia0009280	BeeCAsia 28	28/5/2017	ELKU	BeeCAsia	Nomioides minutissimus minutissimus	Animalia	Arthropoda	Insecta	Hymenoptera	Halictidae	Nomioidinae	Nomioides	minutissimus	minutissimus	(Rossi, 1790)	R. Murao	2012	R. Murao	22/08/2002	CN	Changji Prov.	CN3	Fukang, alt. 520m, Changji Prov., Xinjiang Uygur Aut. Reg.			M	host: Tamarix sp.	1
BeeCAsia0009281	BeeCAsia 28	28/5/2017	ELKU	BeeCAsia	Nomioides minutissimus minutissimus	Animalia	Arthropoda	Insecta	Hymenoptera	Halictidae	Nomioidinae	Nomioides	minutissimus	minutissimus	(Rossi, 1790)	R. Murao	2012	R. Murao	22/08/2002	CN	Changji Prov.	CN3	Fukang, alt. 520m, Changji Prov., Xinjiang Uygur Aut. Reg.			M	host: Tamarix sp.	1
BeeCAsia0009282	BeeCAsia 28	28/5/2017	ELKU	BeeCAsia	Nomioides minutissimus minutissimus	Animalia	Arthropoda	Insecta	Hymenoptera	Halictidae	Nomioidinae	Nomioides	minutissimus	minutissimus	(Rossi, 1790)	R. Murao	2012	R. Murao	22/08/2002	CN	Changji Prov.	CN3	Fukang, alt. 520m, Changji Prov., Xinjiang Uygur Aut. Reg.			M	host: Tamarix sp.	1
BeeCAsia0009300	BeeCAsia 28	28/5/2017	ELKU	BeeCAsia	Nomioides minutissimus minutissimus	Animalia	Arthropoda	Insecta	Hymenoptera	Halictidae	Nomioidinae	Nomioides	minutissimus	minutissimus	(Rossi, 1790)	R. Murao	2012	R. Murao	22/08/2002	CN	Changji Prov.	CN3	Fukang, alt. 520m, Changji Prov., Xinjiang Uygur Aut. Reg.			M	host: Tamarix sp.	1
BeeCAsia0009301	BeeCAsia 28	28/5/2017	ELKU	BeeCAsia	Nomioides minutissimus minutissimus	Animalia	Arthropoda	Insecta	Hymenoptera	Halictidae	Nomioidinae	Nomioides	minutissimus	minutissimus	(Rossi, 1790)	R. Murao	2012	R. Murao	22/08/2002	CN	Changji Prov.	CN3	Fukang, alt. 520m, Changji Prov., Xinjiang Uygur Aut. Reg.			M	host: Tamarix sp.	1
BeeCAsia0009302	BeeCAsia 28	28/5/2017	ELKU	BeeCAsia	Nomioides minutissimus minutissimus	Animalia	Arthropoda	Insecta	Hymenoptera	Halictidae	Nomioidinae	Nomioides	minutissimus	minutissimus	(Rossi, 1790)	R. Murao	2012	R. Murao	22/08/2002	CN	Changji Prov.	CN3	Fukang, alt. 520m, Changji Prov., Xinjiang Uygur Aut. Reg.			M	host: Tamarix sp.	1
BeeCAsia0009303	BeeCAsia 28	28/5/2017	ELKU	BeeCAsia	Nomioides minutissimus minutissimus	Animalia	Arthropoda	Insecta	Hymenoptera	Halictidae	Nomioidinae	Nomioides	minutissimus	minutissimus	(Rossi, 1790)	R. Murao	2012	R. Murao	22/08/2002	CN	Changji Prov.	CN3	Fukang, alt. 520m, Changji Prov., Xinjiang Uygur Aut. Reg.			M	host: Tamarix sp.	1
BeeCAsia0009318	BeeCAsia 28	28/5/2017	ELKU	BeeCAsia	Nomioides gussakouskiji	Animalia	Arthropoda	Insecta	Hymenoptera	Halictidae	Nomioidinae	Nomioides	gussakouskiji		Blüthgen, 1933	R. Murao	2012	R. Murao	22/08/2002	CN	Changji Prov.	CN3	Fukang, alt. 520m, Changji Prov., Xinjiang Uygur Aut. Reg.			M	host: Tamarix sp.	1
BeeCAsia0009170	BeeCAsia 28	28/5/2017	ELKU	BeeCAsia	Nomioides minutissimus minutissimus	Animalia	Arthropoda	Insecta	Hymenoptera	Halictidae	Nomioidinae	Nomioides	minutissimus	minutissimus	(Rossi, 1790)	R. Murao	2012	A. Dawut	26/08/2002	CN	Ili Prov.	CN4	Gaoquan, Kuitun city, Xinjiang Urgur Aut. Reg.			M	host: Tamarix sp.	1
BeeCAsia0009196	BeeCAsia 28	28/5/2017	ELKU	BeeCAsia	Nomioides minutissimus minutissimus	Animalia	Arthropoda	Insecta	Hymenoptera	Halictidae	Nomioidinae	Nomioides	minutissimus	minutissimus	(Rossi, 1790)	R. Murao	2012	A. Dawut	26/08/2002	CN	Ili Prov.	CN4	Gaoquan, Kuitun city, Xinjiang Urgur Aut. Reg.			M	host: Tamarix sp.	1
BeeCAsia0009304	BeeCAsia 28	28/5/2017	ELKU	BeeCAsia	Nomioides minutissimus minutissimus	Animalia	Arthropoda	Insecta	Hymenoptera	Halictidae	Nomioidinae	Nomioides	minutissimus	minutissimus	(Rossi, 1790)	R. Murao	2012	A. Dawut	26/08/2002	CN	Ili Prov.	CN4	Gaoquan, Kuitun city, Xinjiang Urgur Aut. Reg.			M	host: Tamarix sp.	1
BeeCAsia0009171	BeeCAsia 28	28/5/2017	ELKU	BeeCAsia	Nomioides minutissimus minutissimus	Animalia	Arthropoda	Insecta	Hymenoptera	Halictidae	Nomioidinae	Nomioides	minutissimus	minutissimus	(Rossi, 1790)	R. Murao	2012	A. Dawut	26/08/2002	CN	Ili Prov.	CN4	Gaoquan, Kuitun city, Xinjiang Urgur Aut. Reg.			M		1
BeeCAsia0009172	BeeCAsia 28	28/5/2017	ELKU	BeeCAsia	Nomioides minutissimus minutissimus	Animalia	Arthropoda	Insecta	Hymenoptera	Halictidae	Nomioidinae	Nomioides	minutissimus	minutissimus	(Rossi, 1790)	R. Murao	2012	O. Tadauchi	26/08/2002	CN	Ili Prov.	CN11	West of Kuitun, alt. 560 m, Ili Prov., Xinjiang Uygur Aut. Reg.	83.9667	44.4333	M	host: Chondrilla sp.	1
BeeCAsia0009173	BeeCAsia 28	28/5/2017	ELKU	BeeCAsia	Nomioides minutissimus minutissimus	Animalia	Arthropoda	Insecta	Hymenoptera	Halictidae	Nomioidinae	Nomioides	minutissimus	minutissimus	(Rossi, 1790)	R. Murao	2012	O. Tadauchi	26/08/2002	CN	Ili Prov.	CN11	West of Kuitun, alt. 560 m, Ili Prov., Xinjiang Uygur Aut. Reg.	83.9667	44.4333	M	host: Chondrilla sp.	1
BeeCAsia0009174	BeeCAsia 28	28/5/2017	ELKU	BeeCAsia	Nomioides minutissimus minutissimus	Animalia	Arthropoda	Insecta	Hymenoptera	Halictidae	Nomioidinae	Nomioides	minutissimus	minutissimus	(Rossi, 1790)	R. Murao	2012	O. Tadauchi	26/08/2002	CN	Ili Prov.	CN11	West of Kuitun, alt. 560 m, Ili Prov., Xinjiang Uygur Aut. Reg.	83.9667	44.4333	M	host: Chondrilla sp.	1
BeeCAsia0009175	BeeCAsia 28	28/5/2017	ELKU	BeeCAsia	Nomioides minutissimus minutissimus	Animalia	Arthropoda	Insecta	Hymenoptera	Halictidae	Nomioidinae	Nomioides	minutissimus	minutissimus	(Rossi, 1790)	R. Murao	2012	O. Tadauchi	26/08/2002	CN	Ili Prov.	CN11	West of Kuitun, alt. 560 m, Ili Prov., Xinjiang Uygur Aut. Reg.	83.9667	44.4333	M	host: Chondrilla sp.	1
BeeCAsia0009176	BeeCAsia 28	28/5/2017	ELKU	BeeCAsia	Nomioides minutissimus minutissimus	Animalia	Arthropoda	Insecta	Hymenoptera	Halictidae	Nomioidinae	Nomioides	minutissimus	minutissimus	(Rossi, 1790)	R. Murao	2012	O. Tadauchi	26/08/2002	CN	Ili Prov.	CN11	West of Kuitun, alt. 560 m, Ili Prov., Xinjiang Uygur Aut. Reg.	83.9667	44.4333	M	host: Chondrilla sp.	1
BeeCAsia0009177	BeeCAsia 28	28/5/2017	ELKU	BeeCAsia	Nomioides minutissimus minutissimus	Animalia	Arthropoda	Insecta	Hymenoptera	Halictidae	Nomioidinae	Nomioides	minutissimus	minutissimus	(Rossi, 1790)	R. Murao	2012	O. Tadauchi	26/08/2002	CN	Ili Prov.	CN11	West of Kuitun, alt. 560 m, Ili Prov., Xinjiang Uygur Aut. Reg.	83.9667	44.4333	M	host: Chondrilla sp.	1
BeeCAsia0009178	BeeCAsia 28	28/5/2017	ELKU	BeeCAsia	Nomioides minutissimus minutissimus	Animalia	Arthropoda	Insecta	Hymenoptera	Halictidae	Nomioidinae	Nomioides	minutissimus	minutissimus	(Rossi, 1790)	R. Murao	2012	O. Tadauchi	26/08/2002	CN	Ili Prov.	CN11	West of Kuitun, alt. 560 m, Ili Prov., Xinjiang Uygur Aut. Reg.	83.9667	44.4333	M	host: Chondrilla sp.	1
BeeCAsia0009197	BeeCAsia 28	28/5/2017	ELKU	BeeCAsia	Nomioides minutissimus minutissimus	Animalia	Arthropoda	Insecta	Hymenoptera	Halictidae	Nomioidinae	Nomioides	minutissimus	minutissimus	(Rossi, 1790)	R. Murao	2012	O. Tadauchi	26/08/2002	CN	Ili Prov.	CN11	West of Kuitun, alt. 560 m, Ili Prov., Xinjiang Uygur Aut. Reg.	83.9667	44.4333	M	host: Chondrilla sp.	1
BeeCAsia0009198	BeeCAsia 28	28/5/2017	ELKU	BeeCAsia	Nomioides minutissimus minutissimus	Animalia	Arthropoda	Insecta	Hymenoptera	Halictidae	Nomioidinae	Nomioides	minutissimus	minutissimus	(Rossi, 1790)	R. Murao	2012	O. Tadauchi	26/08/2002	CN	Ili Prov.	CN11	West of Kuitun, alt. 560 m, Ili Prov., Xinjiang Uygur Aut. Reg.	83.9667	44.4333	M	host: Chondrilla sp.	1
BeeCAsia0009179	BeeCAsia 28	28/5/2017	ELKU	BeeCAsia	Nomioides minutissimus minutissimus	Animalia	Arthropoda	Insecta	Hymenoptera	Halictidae	Nomioidinae	Nomioides	minutissimus	minutissimus	(Rossi, 1790)	R. Murao	2012	R. Murao	26/08/2002	CN	Ili Prov.	CN11	West of Kuitun, alt. 560 m, Ili Prov., Xinjiang Uygur Aut. Reg.	83.9667	44.4333	M	host: Chondrilla sp.	1
BeeCAsia0009199	BeeCAsia 28	28/5/2017	ELKU	BeeCAsia	Nomioides minutissimus minutissimus	Animalia	Arthropoda	Insecta	Hymenoptera	Halictidae	Nomioidinae	Nomioides	minutissimus	minutissimus	(Rossi, 1790)	R. Murao	2012	R. Murao	26/08/2002	CN	Ili Prov.	CN11	West of Kuitun, alt. 560 m, Ili Prov., Xinjiang Uygur Aut. Reg.	83.9667	44.4333	M	host: Chondrilla sp.	1
BeeCAsia0009200	BeeCAsia 28	28/5/2017	ELKU	BeeCAsia	Nomioides minutissimus minutissimus	Animalia	Arthropoda	Insecta	Hymenoptera	Halictidae	Nomioidinae	Nomioides	minutissimus	minutissimus	(Rossi, 1790)	R. Murao	2012	R. Murao	26/08/2002	CN	Ili Prov.	CN11	West of Kuitun, alt. 560 m, Ili Prov., Xinjiang Uygur Aut. Reg.	83.9667	44.4333	M	host: Chondrilla sp.	1
BeeCAsia0009284	BeeCAsia 28	28/5/2017	ELKU	BeeCAsia	Nomioides minutissimus minutissimus	Animalia	Arthropoda	Insecta	Hymenoptera	Halictidae	Nomioidinae	Nomioides	minutissimus	minutissimus	(Rossi, 1790)	R. Murao	2012	R. Murao	26/08/2002	CN	Ili Prov.	CN11	West of Kuitun, alt. 560 m, Ili Prov., Xinjiang Uygur Aut. Reg.	83.9667	44.4333	M	host: Chondrilla sp.	1
BeeCAsia0009285	BeeCAsia 28	28/5/2017	ELKU	BeeCAsia	Nomioides minutissimus minutissimus	Animalia	Arthropoda	Insecta	Hymenoptera	Halictidae	Nomioidinae	Nomioides	minutissimus	minutissimus	(Rossi, 1790)	R. Murao	2012	R. Murao	26/08/2002	CN	Ili Prov.	CN11	West of Kuitun, alt. 560 m, Ili Prov., Xinjiang Uygur Aut. Reg.	83.9667	44.4333	M	host: Chondrilla sp.	1
BeeCAsia0009286	BeeCAsia 28	28/5/2017	ELKU	BeeCAsia	Nomioides minutissimus minutissimus	Animalia	Arthropoda	Insecta	Hymenoptera	Halictidae	Nomioidinae	Nomioides	minutissimus	minutissimus	(Rossi, 1790)	R. Murao	2012	R. Murao	26/08/2002	CN	Ili Prov.	CN11	West of Kuitun, alt. 560 m, Ili Prov., Xinjiang Uygur Aut. Reg.	83.9667	44.4333	M	host: Chondrilla sp.	1
BeeCAsia0009287	BeeCAsia 28	28/5/2017	ELKU	BeeCAsia	Nomioides minutissimus minutissimus	Animalia	Arthropoda	Insecta	Hymenoptera	Halictidae	Nomioidinae	Nomioides	minutissimus	minutissimus	(Rossi, 1790)	R. Murao	2012	R. Murao	26/08/2002	CN	Ili Prov.	CN11	West of Kuitun, alt. 560 m, Ili Prov., Xinjiang Uygur Aut. Reg.	83.9667	44.4333	M	host: Chondrilla sp.	1
BeeCAsia0009288	BeeCAsia 28	28/5/2017	ELKU	BeeCAsia	Nomioides minutissimus minutissimus	Animalia	Arthropoda	Insecta	Hymenoptera	Halictidae	Nomioidinae	Nomioides	minutissimus	minutissimus	(Rossi, 1790)	R. Murao	2012	R. Murao	26/08/2002	CN	Ili Prov.	CN11	West of Kuitun, alt. 560 m, Ili Prov., Xinjiang Uygur Aut. Reg.	83.9667	44.4333	M	host: Chondrilla sp.	1
BeeCAsia0009289	BeeCAsia 28	28/5/2017	ELKU	BeeCAsia	Nomioides minutissimus minutissimus	Animalia	Arthropoda	Insecta	Hymenoptera	Halictidae	Nomioidinae	Nomioides	minutissimus	minutissimus	(Rossi, 1790)	R. Murao	2012	R. Murao	26/08/2002	CN	Ili Prov.	CN11	West of Kuitun, alt. 560 m, Ili Prov., Xinjiang Uygur Aut. Reg.	83.9667	44.4333	M	host: Chondrilla sp.	1
BeeCAsia0009290	BeeCAsia 28	28/5/2017	ELKU	BeeCAsia	Nomioides minutissimus minutissimus	Animalia	Arthropoda	Insecta	Hymenoptera	Halictidae	Nomioidinae	Nomioides	minutissimus	minutissimus	(Rossi, 1790)	R. Murao	2012	R. Murao	26/08/2002	CN	Ili Prov.	CN11	West of Kuitun, alt. 560 m, Ili Prov., Xinjiang Uygur Aut. Reg.	83.9667	44.4333	M	host: Chondrilla sp.	1
BeeCAsia0009291	BeeCAsia 28	28/5/2017	ELKU	BeeCAsia	Nomioides minutissimus minutissimus	Animalia	Arthropoda	Insecta	Hymenoptera	Halictidae	Nomioidinae	Nomioides	minutissimus	minutissimus	(Rossi, 1790)	R. Murao	2012	R. Murao	26/08/2002	CN	Ili Prov.	CN11	West of Kuitun, alt. 560 m, Ili Prov., Xinjiang Uygur Aut. Reg.	83.9667	44.4333	M	host: Chondrilla sp.	1
BeeCAsia0009292	BeeCAsia 28	28/5/2017	ELKU	BeeCAsia	Nomioides minutissimus minutissimus	Animalia	Arthropoda	Insecta	Hymenoptera	Halictidae	Nomioidinae	Nomioides	minutissimus	minutissimus	(Rossi, 1790)	R. Murao	2012	R. Murao	26/08/2002	CN	Ili Prov.	CN11	West of Kuitun, alt. 560 m, Ili Prov., Xinjiang Uygur Aut. Reg.	83.9667	44.4333	M	host: Chondrilla sp.	1
BeeCAsia0009293	BeeCAsia 28	28/5/2017	ELKU	BeeCAsia	Nomioides minutissimus minutissimus	Animalia	Arthropoda	Insecta	Hymenoptera	Halictidae	Nomioidinae	Nomioides	minutissimus	minutissimus	(Rossi, 1790)	R. Murao	2012	R. Murao	26/08/2002	CN	Ili Prov.	CN11	West of Kuitun, alt. 560 m, Ili Prov., Xinjiang Uygur Aut. Reg.	83.9667	44.4333	M	host: Chondrilla sp.	1
BeeCAsia0009295	BeeCAsia 28	28/5/2017	ELKU	BeeCAsia	Nomioides minutissimus minutissimus	Animalia	Arthropoda	Insecta	Hymenoptera	Halictidae	Nomioidinae	Nomioides	minutissimus	minutissimus	(Rossi, 1790)	R. Murao	2012	R. Murao	26/08/2002	CN	Ili Prov.	CN11	West of Kuitun, alt. 560 m, Ili Prov., Xinjiang Uygur Aut. Reg.	83.9667	44.4333	M	host: Chondrilla sp.	1
BeeCAsia0009296	BeeCAsia 28	28/5/2017	ELKU	BeeCAsia	Nomioides minutissimus minutissimus	Animalia	Arthropoda	Insecta	Hymenoptera	Halictidae	Nomioidinae	Nomioides	minutissimus	minutissimus	(Rossi, 1790)	R. Murao	2012	R. Murao	26/08/2002	CN	Ili Prov.	CN11	West of Kuitun, alt. 560 m, Ili Prov., Xinjiang Uygur Aut. Reg.	83.9667	44.4333	M	host: Chondrilla sp.	1
BeeCAsia0009297	BeeCAsia 28	28/5/2017	ELKU	BeeCAsia	Nomioides minutissimus minutissimus	Animalia	Arthropoda	Insecta	Hymenoptera	Halictidae	Nomioidinae	Nomioides	minutissimus	minutissimus	(Rossi, 1790)	R. Murao	2012	R. Murao	26/08/2002	CN	Ili Prov.	CN11	West of Kuitun, alt. 560 m, Ili Prov., Xinjiang Uygur Aut. Reg.	83.9667	44.4333	M	host: Chondrilla sp.	1
BeeCAsia0009294	BeeCAsia 28	28/5/2017	ELKU	BeeCAsia	Nomioides minutissimus minutissimus	Animalia	Arthropoda	Insecta	Hymenoptera	Halictidae	Nomioidinae	Nomioides	minutissimus	minutissimus	(Rossi, 1790)	R. Murao	2012	R. Murao	27/08/2002	CN	Altay Prov.	CN2	Jeminay County, alt. 800-1050 m, Altay Prov., Xinjiang Uygur Aut. Reg.			M	host: Leguminosae gen. et. sp.	1
BeeCAsia0009298	BeeCAsia 28	28/5/2017	ELKU	BeeCAsia	Nomioides minutissimus minutissimus	Animalia	Arthropoda	Insecta	Hymenoptera	Halictidae	Nomioidinae	Nomioides	minutissimus	minutissimus	(Rossi, 1790)	R. Murao	2012	R. Murao	03/09/2002	KZ		KZ69	Nurly village			M	host: Chondrilla sp.	1
BeeCAsia0009299	BeeCAsia 28	28/5/2017	ELKU	BeeCAsia	Nomioides minutissimus minutissimus	Animalia	Arthropoda	Insecta	Hymenoptera	Halictidae	Nomioidinae	Nomioides	minutissimus	minutissimus	(Rossi, 1790)	R. Murao	2012	R. Murao	03/09/2002	KZ		KZ69	Nurly village			M	host: Chondrilla sp.	1
BeeCAsia0009283	BeeCAsia 28	28/5/2017	ELKU	BeeCAsia	Nomioides minutissimus minutissimus	Animalia	Arthropoda	Insecta	Hymenoptera	Halictidae	Nomioidinae	Nomioides	minutissimus	minutissimus	(Rossi, 1790)	R. Murao	2012	R. Murao	24/08/2002	CN	Ili Prov.	CN6	Jinghe, alt. 540 m, Ili Prov., Xinjiang Uygur Aut. Reg.			M	host: Asteraceae gen. et. sp.	1
BeeCAsia0009191	BeeCAsia 28	28/5/2017	ELKU	BeeCAsia	Nomioides minutissimus minutissimus	Animalia	Arthropoda	Insecta	Hymenoptera	Halictidae	Nomioidinae	Nomioides	minutissimus	minutissimus	(Rossi, 1790)	R. Murao	2012	A. Dawut	27/08/2002	CN	Altay Prov.	CN2	Jeminay County, alt. 800-1050 m, Altay Prov., Xinjiang Uygur Aut. Reg.			M		1
BeeCAsia0009260	BeeCAsia 28	28/5/2017	ELKU	BeeCAsia	Nomioides minutissimus minutissimus	Animalia	Arthropoda	Insecta	Hymenoptera	Halictidae	Nomioidinae	Nomioides	minutissimus	minutissimus	(Rossi, 1790)	R. Murao	2012	A. Dawut	22/08/2002	CN	Changji Prov.	CN3	Fukang, alt. 520m, Changji Prov., Xinjiang Uygur Aut. Reg.			M	host: Tamarix sp.	1
BeeCAsia0009309	BeeCAsia 28	28/5/2017	ELKU	BeeCAsia	Nomioides minutissimus minutissimus	Animalia	Arthropoda	Insecta	Hymenoptera	Halictidae	Nomioidinae	Nomioides	minutissimus	minutissimus	(Rossi, 1790)	R. Murao	2012	O. Tadauchi	22/08/2002	CN	Changji Prov.	CN3	Fukang, alt. 520m, Changji Prov., Xinjiang Uygur Aut. Reg.			F	host: Tamarix sp.	1
BeeCAsia0009310	BeeCAsia 28	28/5/2017	ELKU	BeeCAsia	Nomioides minutissimus minutissimus	Animalia	Arthropoda	Insecta	Hymenoptera	Halictidae	Nomioidinae	Nomioides	minutissimus	minutissimus	(Rossi, 1790)	R. Murao	2012	O. Tadauchi	22/08/2002	CN	Changji Prov.	CN3	Fukang, alt. 520m, Changji Prov., Xinjiang Uygur Aut. Reg.			F	host: Tamarix sp.	1
BeeCAsia0009305	BeeCAsia 28	28/5/2017	ELKU	BeeCAsia	Nomioides minutissimus minutissimus	Animalia	Arthropoda	Insecta	Hymenoptera	Halictidae	Nomioidinae	Nomioides	minutissimus	minutissimus	(Rossi, 1790)	R. Murao	2012	A. Dawut	22/08/2002	CN	Changji Prov.	CN3	Fukang, alt. 520m, Changji Prov., Xinjiang Uygur Aut. Reg.			F	host: Tamarix sp.	1
BeeCAsia0009308	BeeCAsia 28	28/5/2017	ELKU	BeeCAsia	Nomioides minutissimus minutissimus	Animalia	Arthropoda	Insecta	Hymenoptera	Halictidae	Nomioidinae	Nomioides	minutissimus	minutissimus	(Rossi, 1790)	R. Murao	2012	A. Dawut	22/08/2002	CN	Changji Prov.	CN3	Fukang, alt. 520m, Changji Prov., Xinjiang Uygur Aut. Reg.			F	host: Tamarix sp.	1
BeeCAsia0009311	BeeCAsia 28	28/5/2017	ELKU	BeeCAsia	Nomioides minutissimus minutissimus	Animalia	Arthropoda	Insecta	Hymenoptera	Halictidae	Nomioidinae	Nomioides	minutissimus	minutissimus	(Rossi, 1790)	R. Murao	2012	R. Murao	22/08/2002	CN	Changji Prov.	CN3	Fukang, alt. 520m, Changji Prov., Xinjiang Uygur Aut. Reg.			F	host: Tamarix sp.	1
BeeCAsia0009312	BeeCAsia 28	28/5/2017	ELKU	BeeCAsia	Nomioides minutissimus minutissimus	Animalia	Arthropoda	Insecta	Hymenoptera	Halictidae	Nomioidinae	Nomioides	minutissimus	minutissimus	(Rossi, 1790)	R. Murao	2012	R. Murao	03/09/2002	KZ		KZ69	Nurly village			F	host: Chondrilla sp.	1
BeeCAsia0009313	BeeCAsia 28	28/5/2017	ELKU	BeeCAsia	Nomioides minutissimus minutissimus	Animalia	Arthropoda	Insecta	Hymenoptera	Halictidae	Nomioidinae	Nomioides	minutissimus	minutissimus	(Rossi, 1790)	R. Murao	2012	R. Murao	26/08/2002	CN	Ili Prov.	CN11	West of Kuitun, alt. 560 m, Ili Prov., Xinjiang Uygur Aut. Reg.	83.9667	44.4333	M	host: Chondrilla sp.	1
BeeCAsia0009316	BeeCAsia 28	28/5/2017	ELKU	BeeCAsia	Nomioides gussakouskiji	Animalia	Arthropoda	Insecta	Hymenoptera	Halictidae	Nomioidinae	Nomioides	gussakouskiji		Blüthgen, 1933	R. Murao	2012	A. Dawut	22/08/2002	CN	Changji Prov.	CN3	Fukang, alt. 520m, Changji Prov., Xinjiang Uygur Aut. Reg.			M	host: Tamarix sp.	1
BeeCAsia0009384	BeeCAsia 28	28/5/2017	ELKU	BeeCAsia	Ceylalictus (Ceylalictus) variegatus	Animalia	Arthropoda	Insecta	Hymenoptera	Halictidae	Nomioidinae	Ceylalictus	variegatus		(Olivier, 1789)	R. Murao	2012	O. Tadauchi	08/05/2004	KZ	South Kazakhstan Prov.	KZ61	Polevod, riverside Syrdarya river, South Kazakhstan Prov.			F	host: Tamarix sp.	1
BeeCAsia0009385	BeeCAsia 28	28/5/2017	ELKU	BeeCAsia	Ceylalictus (Ceylalictus) variegatus	Animalia	Arthropoda	Insecta	Hymenoptera	Halictidae	Nomioidinae	Ceylalictus	variegatus		(Olivier, 1789)	R. Murao	2012	O. Tadauchi	08/05/2004	KZ	South Kazakhstan Prov.	KZ61	Polevod, riverside Syrdarya river, South Kazakhstan Prov.			F	host: Tamarix sp.	1
BeeCAsia0009386	BeeCAsia 28	28/5/2017	ELKU	BeeCAsia	Ceylalictus (Ceylalictus) variegatus	Animalia	Arthropoda	Insecta	Hymenoptera	Halictidae	Nomioidinae	Ceylalictus	variegatus		(Olivier, 1789)	R. Murao	2012	O. Tadauchi	08/05/2004	KZ	South Kazakhstan Prov.	KZ61	Polevod, riverside Syrdarya river, South Kazakhstan Prov.			F	host: Tamarix sp.	1
BeeCAsia0009387	BeeCAsia 28	28/5/2017	ELKU	BeeCAsia	Ceylalictus (Ceylalictus) variegatus	Animalia	Arthropoda	Insecta	Hymenoptera	Halictidae	Nomioidinae	Ceylalictus	variegatus		(Olivier, 1789)	R. Murao	2012	O. Tadauchi	08/05/2004	KZ	South Kazakhstan Prov.	KZ61	Polevod, riverside Syrdarya river, South Kazakhstan Prov.			F	host: Tamarix sp.	1
BeeCAsia0009388	BeeCAsia 28	28/5/2017	ELKU	BeeCAsia	Ceylalictus (Ceylalictus) variegatus	Animalia	Arthropoda	Insecta	Hymenoptera	Halictidae	Nomioidinae	Ceylalictus	variegatus		(Olivier, 1789)	R. Murao	2012	O. Tadauchi	08/05/2004	KZ	South Kazakhstan Prov.	KZ61	Polevod, riverside Syrdarya river, South Kazakhstan Prov.			F	host: Tamarix sp.	1
BeeCAsia0009389	BeeCAsia 28	28/5/2017	ELKU	BeeCAsia	Ceylalictus (Ceylalictus) variegatus	Animalia	Arthropoda	Insecta	Hymenoptera	Halictidae	Nomioidinae	Ceylalictus	variegatus		(Olivier, 1789)	R. Murao	2012	O. Tadauchi	08/05/2004	KZ	South Kazakhstan Prov.	KZ61	Polevod, riverside Syrdarya river, South Kazakhstan Prov.			F	host: Tamarix sp.	1
BeeCAsia0009390	BeeCAsia 28	28/5/2017	ELKU	BeeCAsia	Ceylalictus (Ceylalictus) variegatus	Animalia	Arthropoda	Insecta	Hymenoptera	Halictidae	Nomioidinae	Ceylalictus	variegatus		(Olivier, 1789)	R. Murao	2012	O. Tadauchi	08/05/2004	KZ	South Kazakhstan Prov.	KZ61	Polevod, riverside Syrdarya river, South Kazakhstan Prov.			F	host: Tamarix sp.	1
BeeCAsia0009391	BeeCAsia 28	28/5/2017	ELKU	BeeCAsia	Ceylalictus (Ceylalictus) variegatus	Animalia	Arthropoda	Insecta	Hymenoptera	Halictidae	Nomioidinae	Ceylalictus	variegatus		(Olivier, 1789)	R. Murao	2012	O. Tadauchi	08/05/2004	KZ	South Kazakhstan Prov.	KZ61	Polevod, riverside Syrdarya river, South Kazakhstan Prov.			F	host: Tamarix sp.	1
BeeCAsia0009392	BeeCAsia 28	28/5/2017	ELKU	BeeCAsia	Ceylalictus (Ceylalictus) variegatus	Animalia	Arthropoda	Insecta	Hymenoptera	Halictidae	Nomioidinae	Ceylalictus	variegatus		(Olivier, 1789)	R. Murao	2012	O. Tadauchi	08/05/2004	KZ	South Kazakhstan Prov.	KZ61	Polevod, riverside Syrdarya river, South Kazakhstan Prov.			F	host: Tamarix sp.	1
BeeCAsia0009393	BeeCAsia 28	28/5/2017	ELKU	BeeCAsia	Ceylalictus (Ceylalictus) variegatus	Animalia	Arthropoda	Insecta	Hymenoptera	Halictidae	Nomioidinae	Ceylalictus	variegatus		(Olivier, 1789)	R. Murao	2012	O. Tadauchi	08/05/2004	KZ	South Kazakhstan Prov.	KZ61	Polevod, riverside Syrdarya river, South Kazakhstan Prov.			F	host: Tamarix sp.	1
BeeCAsia0009394	BeeCAsia 28	28/5/2017	ELKU	BeeCAsia	Ceylalictus (Ceylalictus) variegatus	Animalia	Arthropoda	Insecta	Hymenoptera	Halictidae	Nomioidinae	Ceylalictus	variegatus		(Olivier, 1789)	R. Murao	2012	O. Tadauchi	08/05/2004	KZ	South Kazakhstan Prov.	KZ61	Polevod, riverside Syrdarya river, South Kazakhstan Prov.			F	host: Tamarix sp.	1
BeeCAsia0009395	BeeCAsia 28	28/5/2017	ELKU	BeeCAsia	Ceylalictus (Ceylalictus) variegatus	Animalia	Arthropoda	Insecta	Hymenoptera	Halictidae	Nomioidinae	Ceylalictus	variegatus		(Olivier, 1789)	R. Murao	2012	O. Tadauchi	08/05/2004	KZ	South Kazakhstan Prov.	KZ61	Polevod, riverside Syrdarya river, South Kazakhstan Prov.			F	host: Tamarix sp.	1
BeeCAsia0009396	BeeCAsia 28	28/5/2017	ELKU	BeeCAsia	Ceylalictus (Ceylalictus) variegatus	Animalia	Arthropoda	Insecta	Hymenoptera	Halictidae	Nomioidinae	Ceylalictus	variegatus		(Olivier, 1789)	R. Murao	2012	O. Tadauchi	08/05/2004	KZ	South Kazakhstan Prov.	KZ61	Polevod, riverside Syrdarya river, South Kazakhstan Prov.			F	host: Tamarix sp.	1
BeeCAsia0009417	BeeCAsia 28	28/5/2017	ELKU	BeeCAsia	Ceylalictus (Ceylalictus) variegatus	Animalia	Arthropoda	Insecta	Hymenoptera	Halictidae	Nomioidinae	Ceylalictus	variegatus		(Olivier, 1789)	R. Murao	2012	O. Tadauchi	03/05/2004	KZ	South Kazakhstan Prov.	KZ64	Sutkent village, North of Kamsomolskoe, South Kazakhstan Prov.			F	host: Tamarix sp.	1
BeeCAsia0009418	BeeCAsia 28	28/5/2017	ELKU	BeeCAsia	Ceylalictus (Ceylalictus) variegatus	Animalia	Arthropoda	Insecta	Hymenoptera	Halictidae	Nomioidinae	Ceylalictus	variegatus		(Olivier, 1789)	R. Murao	2012	O. Tadauchi	03/05/2004	KZ	South Kazakhstan Prov.	KZ64	Sutkent village, North of Kamsomolskoe, South Kazakhstan Prov.			F	host: Tamarix sp.	1
BeeCAsia0009419	BeeCAsia 28	28/5/2017	ELKU	BeeCAsia	Ceylalictus (Ceylalictus) variegatus	Animalia	Arthropoda	Insecta	Hymenoptera	Halictidae	Nomioidinae	Ceylalictus	variegatus		(Olivier, 1789)	R. Murao	2012	O. Tadauchi	03/05/2004	KZ	South Kazakhstan Prov.	KZ64	Sutkent village, North of Kamsomolskoe, South Kazakhstan Prov.			F	host: Tamarix sp.	1
BeeCAsia0009409	BeeCAsia 28	28/5/2017	ELKU	BeeCAsia	Ceylalictus (Ceylalictus) variegatus	Animalia	Arthropoda	Insecta	Hymenoptera	Halictidae	Nomioidinae	Ceylalictus	variegatus		(Olivier, 1789)	R. Murao	2012	R. Murao	03/05/2004	KZ	South Kazakhstan Prov.	KZ64	Sutkent village, North of Kamsomolskoe, South Kazakhstan Prov.			F		1
BeeCAsia0009410	BeeCAsia 28	28/5/2017	ELKU	BeeCAsia	Ceylalictus (Ceylalictus) variegatus	Animalia	Arthropoda	Insecta	Hymenoptera	Halictidae	Nomioidinae	Ceylalictus	variegatus		(Olivier, 1789)	R. Murao	2012	R. Murao	03/05/2004	KZ	South Kazakhstan Prov.	KZ64	Sutkent village, North of Kamsomolskoe, South Kazakhstan Prov.			F		1
BeeCAsia0009411	BeeCAsia 28	28/5/2017	ELKU	BeeCAsia	Ceylalictus (Ceylalictus) variegatus	Animalia	Arthropoda	Insecta	Hymenoptera	Halictidae	Nomioidinae	Ceylalictus	variegatus		(Olivier, 1789)	R. Murao	2012	R. Murao	03/05/2004	KZ	South Kazakhstan Prov.	KZ64	Sutkent village, North of Kamsomolskoe, South Kazakhstan Prov.			F		1
BeeCAsia0009412	BeeCAsia 28	28/5/2017	ELKU	BeeCAsia	Ceylalictus (Ceylalictus) variegatus	Animalia	Arthropoda	Insecta	Hymenoptera	Halictidae	Nomioidinae	Ceylalictus	variegatus		(Olivier, 1789)	R. Murao	2012	R. Murao	03/05/2004	KZ	South Kazakhstan Prov.	KZ64	Sutkent village, North of Kamsomolskoe, South Kazakhstan Prov.			F		1
BeeCAsia0009413	BeeCAsia 28	28/5/2017	ELKU	BeeCAsia	Ceylalictus (Ceylalictus) variegatus	Animalia	Arthropoda	Insecta	Hymenoptera	Halictidae	Nomioidinae	Ceylalictus	variegatus		(Olivier, 1789)	R. Murao	2012	R. Murao	03/05/2004	KZ	South Kazakhstan Prov.	KZ64	Sutkent village, North of Kamsomolskoe, South Kazakhstan Prov.			F		1
BeeCAsia0009415	BeeCAsia 28	28/5/2017	ELKU	BeeCAsia	Ceylalictus (Ceylalictus) variegatus	Animalia	Arthropoda	Insecta	Hymenoptera	Halictidae	Nomioidinae	Ceylalictus	variegatus		(Olivier, 1789)	R. Murao	2012	R. Murao	03/05/2004	KZ	South Kazakhstan Prov.	KZ64	Sutkent village, North of Kamsomolskoe, South Kazakhstan Prov.			F		1
BeeCAsia0009416	BeeCAsia 28	28/5/2017	ELKU	BeeCAsia	Ceylalictus (Ceylalictus) variegatus	Animalia	Arthropoda	Insecta	Hymenoptera	Halictidae	Nomioidinae	Ceylalictus	variegatus		(Olivier, 1789)	R. Murao	2012	R. Murao	03/05/2004	KZ	South Kazakhstan Prov.	KZ64	Sutkent village, North of Kamsomolskoe, South Kazakhstan Prov.			F		1
BeeCAsia0009420	BeeCAsia 28	28/5/2017	ELKU	BeeCAsia	Ceylalictus (Ceylalictus) variegatus	Animalia	Arthropoda	Insecta	Hymenoptera	Halictidae	Nomioidinae	Ceylalictus	variegatus		(Olivier, 1789)	R. Murao	2012	R. Murao	03/05/2004	KZ	South Kazakhstan Prov.	KZ64	Sutkent village, North of Kamsomolskoe, South Kazakhstan Prov.			F		1
BeeCAsia0009414	BeeCAsia 28	28/5/2017	ELKU	BeeCAsia	Ceylalictus (Ceylalictus) variegatus	Animalia	Arthropoda	Insecta	Hymenoptera	Halictidae	Nomioidinae	Ceylalictus	variegatus		(Olivier, 1789)	R. Murao	2012	R. Murao	01/05/2004	KZ	South Kazakhstan Prov.	KZ49	Kamsomolskoe, North of Chordara, South Kazakhstan Prov.			F		1
BeeCAsia0009421	BeeCAsia 28	28/5/2017	ELKU	BeeCAsia	Ceylalictus (Ceylalictus) variegatus	Animalia	Arthropoda	Insecta	Hymenoptera	Halictidae	Nomioidinae	Ceylalictus	variegatus		(Olivier, 1789)	R. Murao	2012	R. Murao	08/05/2004	KZ	South Kazakhstan Prov.	KZ61	Polevod, riverside Syrdarya river, South Kazakhstan Prov.			F	host: Tamarix sp.	1
BeeCAsia0009422	BeeCAsia 28	28/5/2017	ELKU	BeeCAsia	Ceylalictus (Ceylalictus) variegatus	Animalia	Arthropoda	Insecta	Hymenoptera	Halictidae	Nomioidinae	Ceylalictus	variegatus		(Olivier, 1789)	R. Murao	2012	R. Murao	08/05/2004	KZ	South Kazakhstan Prov.	KZ61	Polevod, riverside Syrdarya river, South Kazakhstan Prov.			F	host: Tamarix sp.	1
BeeCAsia0009423	BeeCAsia 28	28/5/2017	ELKU	BeeCAsia	Ceylalictus (Ceylalictus) variegatus	Animalia	Arthropoda	Insecta	Hymenoptera	Halictidae	Nomioidinae	Ceylalictus	variegatus		(Olivier, 1789)	R. Murao	2012	R. Murao	08/05/2004	KZ	South Kazakhstan Prov.	KZ61	Polevod, riverside Syrdarya river, South Kazakhstan Prov.			F	host: Tamarix sp.	1
BeeCAsia0009424	BeeCAsia 28	28/5/2017	ELKU	BeeCAsia	Ceylalictus (Ceylalictus) variegatus	Animalia	Arthropoda	Insecta	Hymenoptera	Halictidae	Nomioidinae	Ceylalictus	variegatus		(Olivier, 1789)	R. Murao	2012	R. Murao	08/05/2004	KZ	South Kazakhstan Prov.	KZ61	Polevod, riverside Syrdarya river, South Kazakhstan Prov.			F	host: Tamarix sp.	1
BeeCAsia0009425	BeeCAsia 28	28/5/2017	ELKU	BeeCAsia	Ceylalictus (Ceylalictus) variegatus	Animalia	Arthropoda	Insecta	Hymenoptera	Halictidae	Nomioidinae	Ceylalictus	variegatus		(Olivier, 1789)	R. Murao	2012	R. Murao	08/05/2004	KZ	South Kazakhstan Prov.	KZ61	Polevod, riverside Syrdarya river, South Kazakhstan Prov.			F	host: Tamarix sp.	1
BeeCAsia0009426	BeeCAsia 28	28/5/2017	ELKU	BeeCAsia	Ceylalictus (Ceylalictus) variegatus	Animalia	Arthropoda	Insecta	Hymenoptera	Halictidae	Nomioidinae	Ceylalictus	variegatus		(Olivier, 1789)	R. Murao	2012	R. Murao	08/05/2004	KZ	South Kazakhstan Prov.	KZ61	Polevod, riverside Syrdarya river, South Kazakhstan Prov.			F	host: Tamarix sp.	1
BeeCAsia0009427	BeeCAsia 28	28/5/2017	ELKU	BeeCAsia	Ceylalictus (Ceylalictus) variegatus	Animalia	Arthropoda	Insecta	Hymenoptera	Halictidae	Nomioidinae	Ceylalictus	variegatus		(Olivier, 1789)	R. Murao	2012	R. Murao	08/05/2004	KZ	South Kazakhstan Prov.	KZ61	Polevod, riverside Syrdarya river, South Kazakhstan Prov.			F	host: Tamarix sp.	1
BeeCAsia0009397	BeeCAsia 28	28/5/2017	ELKU	BeeCAsia	Ceylalictus (Ceylalictus) variegatus	Animalia	Arthropoda	Insecta	Hymenoptera	Halictidae	Nomioidinae	Ceylalictus	variegatus		(Olivier, 1789)	R. Murao	2012	O. Tadauchi	08/05/2004	KZ	South Kazakhstan Prov.	KZ61	Polevod, riverside Syrdarya river, South Kazakhstan Prov.			F	host: Tamarix sp.	1
BeeCAsia0009398	BeeCAsia 28	28/5/2017	ELKU	BeeCAsia	Ceylalictus (Ceylalictus) variegatus	Animalia	Arthropoda	Insecta	Hymenoptera	Halictidae	Nomioidinae	Ceylalictus	variegatus		(Olivier, 1789)	R. Murao	2012	O. Tadauchi	08/05/2004	KZ	South Kazakhstan Prov.	KZ61	Polevod, riverside Syrdarya river, South Kazakhstan Prov.			F	host: Tamarix sp.	1
BeeCAsia0009399	BeeCAsia 28	28/5/2017	ELKU	BeeCAsia	Ceylalictus (Ceylalictus) variegatus	Animalia	Arthropoda	Insecta	Hymenoptera	Halictidae	Nomioidinae	Ceylalictus	variegatus		(Olivier, 1789)	R. Murao	2012	O. Tadauchi	08/05/2004	KZ	South Kazakhstan Prov.	KZ61	Polevod, riverside Syrdarya river, South Kazakhstan Prov.			F	host: Tamarix sp.	1
BeeCAsia0009400	BeeCAsia 28	28/5/2017	ELKU	BeeCAsia	Ceylalictus (Ceylalictus) variegatus	Animalia	Arthropoda	Insecta	Hymenoptera	Halictidae	Nomioidinae	Ceylalictus	variegatus		(Olivier, 1789)	R. Murao	2012	O. Tadauchi	08/05/2004	KZ	South Kazakhstan Prov.	KZ61	Polevod, riverside Syrdarya river, South Kazakhstan Prov.			F	host: Tamarix sp.	1
BeeCAsia0009401	BeeCAsia 28	28/5/2017	ELKU	BeeCAsia	Ceylalictus (Ceylalictus) variegatus	Animalia	Arthropoda	Insecta	Hymenoptera	Halictidae	Nomioidinae	Ceylalictus	variegatus		(Olivier, 1789)	R. Murao	2012	O. Tadauchi	08/05/2004	KZ	South Kazakhstan Prov.	KZ61	Polevod, riverside Syrdarya river, South Kazakhstan Prov.			F	host: Tamarix sp.	1
BeeCAsia0009402	BeeCAsia 28	28/5/2017	ELKU	BeeCAsia	Ceylalictus (Ceylalictus) variegatus	Animalia	Arthropoda	Insecta	Hymenoptera	Halictidae	Nomioidinae	Ceylalictus	variegatus		(Olivier, 1789)	R. Murao	2012	O. Tadauchi	08/05/2004	KZ	South Kazakhstan Prov.	KZ61	Polevod, riverside Syrdarya river, South Kazakhstan Prov.			F	host: Tamarix sp.	1
BeeCAsia0009403	BeeCAsia 28	28/5/2017	ELKU	BeeCAsia	Ceylalictus (Ceylalictus) variegatus	Animalia	Arthropoda	Insecta	Hymenoptera	Halictidae	Nomioidinae	Ceylalictus	variegatus		(Olivier, 1789)	R. Murao	2012	O. Tadauchi	08/05/2004	KZ	South Kazakhstan Prov.	KZ61	Polevod, riverside Syrdarya river, South Kazakhstan Prov.			F	host: Tamarix sp.	1
BeeCAsia0009404	BeeCAsia 28	28/5/2017	ELKU	BeeCAsia	Ceylalictus (Ceylalictus) variegatus	Animalia	Arthropoda	Insecta	Hymenoptera	Halictidae	Nomioidinae	Ceylalictus	variegatus		(Olivier, 1789)	R. Murao	2012	O. Tadauchi	08/05/2004	KZ	South Kazakhstan Prov.	KZ61	Polevod, riverside Syrdarya river, South Kazakhstan Prov.			F	host: Tamarix sp.	1
BeeCAsia0009405	BeeCAsia 28	28/5/2017	ELKU	BeeCAsia	Ceylalictus (Ceylalictus) variegatus	Animalia	Arthropoda	Insecta	Hymenoptera	Halictidae	Nomioidinae	Ceylalictus	variegatus		(Olivier, 1789)	R. Murao	2012	O. Tadauchi	08/05/2004	KZ	South Kazakhstan Prov.	KZ61	Polevod, riverside Syrdarya river, South Kazakhstan Prov.			F	host: Tamarix sp.	1
BeeCAsia0009406	BeeCAsia 28	28/5/2017	ELKU	BeeCAsia	Ceylalictus (Ceylalictus) variegatus	Animalia	Arthropoda	Insecta	Hymenoptera	Halictidae	Nomioidinae	Ceylalictus	variegatus		(Olivier, 1789)	R. Murao	2012	O. Tadauchi	08/05/2004	KZ	South Kazakhstan Prov.	KZ61	Polevod, riverside Syrdarya river, South Kazakhstan Prov.			F	host: Tamarix sp.	1
BeeCAsia0009407	BeeCAsia 28	28/5/2017	ELKU	BeeCAsia	Ceylalictus (Ceylalictus) variegatus	Animalia	Arthropoda	Insecta	Hymenoptera	Halictidae	Nomioidinae	Ceylalictus	variegatus		(Olivier, 1789)	R. Murao	2012	O. Tadauchi	08/05/2004	KZ	South Kazakhstan Prov.	KZ61	Polevod, riverside Syrdarya river, South Kazakhstan Prov.			F	host: Tamarix sp.	1
BeeCAsia0009408	BeeCAsia 28	28/5/2017	ELKU	BeeCAsia	Ceylalictus (Ceylalictus) variegatus	Animalia	Arthropoda	Insecta	Hymenoptera	Halictidae	Nomioidinae	Ceylalictus	variegatus		(Olivier, 1789)	R. Murao	2012	O. Tadauchi	01/05/2004	KZ	South Kazakhstan Prov.	KZ46	Hot spring, West of Kamsomolskoe, Kyzylkum desert, South Kazakhstan Prov.			F	host: Tamarix sp.	1
BeeCAsia0009372	BeeCAsia 28	28/5/2017	ELKU	BeeCAsia	Nomioides ino	Animalia	Arthropoda	Insecta	Hymenoptera	Halictidae	Nomioidinae	Nomioides	ino		(Nurse, 1904)	R. Murao	2012	A. Dawut	26/08/2002	CN	Ili Prov.	CN4	Gaoquan, Kuitun city, Xinjiang Urgur Aut. Reg.			F		1
BeeCAsia0009334	BeeCAsia 28	28/5/2017	ELKU	BeeCAsia	Nomioides minutissimus minutissimus	Animalia	Arthropoda	Insecta	Hymenoptera	Halictidae	Nomioidinae	Nomioides	minutissimus	minutissimus	(Rossi, 1790)	R. Murao	2012	R. Murao	26/08/2002	CN	Ili Prov.	CN11	West of Kuitun, alt. 560 m, Ili Prov., Xinjiang Uygur Aut. Reg.	83.9667	44.4333	F	host: Chondrilla sp.	1
BeeCAsia0009336	BeeCAsia 28	28/5/2017	ELKU	BeeCAsia	Nomioides minutissimus minutissimus	Animalia	Arthropoda	Insecta	Hymenoptera	Halictidae	Nomioidinae	Nomioides	minutissimus	minutissimus	(Rossi, 1790)	R. Murao	2012	R. Murao	26/08/2002	CN	Ili Prov.	CN11	West of Kuitun, alt. 560 m, Ili Prov., Xinjiang Uygur Aut. Reg.	83.9667	44.4333	F	host: Chondrilla sp.	1
BeeCAsia0009337	BeeCAsia 28	28/5/2017	ELKU	BeeCAsia	Nomioides minutissimus minutissimus	Animalia	Arthropoda	Insecta	Hymenoptera	Halictidae	Nomioidinae	Nomioides	minutissimus	minutissimus	(Rossi, 1790)	R. Murao	2012	R. Murao	26/08/2002	CN	Ili Prov.	CN11	West of Kuitun, alt. 560 m, Ili Prov., Xinjiang Uygur Aut. Reg.	83.9667	44.4333	F	host: Chondrilla sp.	1
BeeCAsia0009339	BeeCAsia 28	28/5/2017	ELKU	BeeCAsia	Nomioides minutissimus minutissimus	Animalia	Arthropoda	Insecta	Hymenoptera	Halictidae	Nomioidinae	Nomioides	minutissimus	minutissimus	(Rossi, 1790)	R. Murao	2012	R. Murao	26/08/2002	CN	Ili Prov.	CN11	West of Kuitun, alt. 560 m, Ili Prov., Xinjiang Uygur Aut. Reg.	83.9667	44.4333	F	host: Chondrilla sp.	1
BeeCAsia0009340	BeeCAsia 28	28/5/2017	ELKU	BeeCAsia	Nomioides minutissimus minutissimus	Animalia	Arthropoda	Insecta	Hymenoptera	Halictidae	Nomioidinae	Nomioides	minutissimus	minutissimus	(Rossi, 1790)	R. Murao	2012	R. Murao	26/08/2002	CN	Ili Prov.	CN11	West of Kuitun, alt. 560 m, Ili Prov., Xinjiang Uygur Aut. Reg.	83.9667	44.4333	F	host: Chondrilla sp.	1
BeeCAsia0009341	BeeCAsia 28	28/5/2017	ELKU	BeeCAsia	Nomioides minutissimus minutissimus	Animalia	Arthropoda	Insecta	Hymenoptera	Halictidae	Nomioidinae	Nomioides	minutissimus	minutissimus	(Rossi, 1790)	R. Murao	2012	R. Murao	26/08/2002	CN	Ili Prov.	CN11	West of Kuitun, alt. 560 m, Ili Prov., Xinjiang Uygur Aut. Reg.	83.9667	44.4333	F	host: Chondrilla sp.	1
BeeCAsia0009374	BeeCAsia 28	28/5/2017	ELKU	BeeCAsia	Nomioides ino	Animalia	Arthropoda	Insecta	Hymenoptera	Halictidae	Nomioidinae	Nomioides	ino		(Nurse, 1904)	R. Murao	2012	R. Murao	26/08/2002	CN	Ili Prov.	CN11	West of Kuitun, alt. 560 m, Ili Prov., Xinjiang Uygur Aut. Reg.	83.9667	44.4333	F	host: Chondrilla sp.	1
BeeCAsia0009375	BeeCAsia 28	28/5/2017	ELKU	BeeCAsia	Nomioides ino	Animalia	Arthropoda	Insecta	Hymenoptera	Halictidae	Nomioidinae	Nomioides	ino		(Nurse, 1904)	R. Murao	2012	R. Murao	26/08/2002	CN	Ili Prov.	CN11	West of Kuitun, alt. 560 m, Ili Prov., Xinjiang Uygur Aut. Reg.	83.9667	44.4333	F	host: Chondrilla sp.	1
BeeCAsia0009376	BeeCAsia 28	28/5/2017	ELKU	BeeCAsia	Nomioides ino	Animalia	Arthropoda	Insecta	Hymenoptera	Halictidae	Nomioidinae	Nomioides	ino		(Nurse, 1904)	R. Murao	2012	R. Murao	26/08/2002	CN	Ili Prov.	CN11	West of Kuitun, alt. 560 m, Ili Prov., Xinjiang Uygur Aut. Reg.	83.9667	44.4333	F	host: Chondrilla sp.	1
BeeCAsia0009377	BeeCAsia 28	28/5/2017	ELKU	BeeCAsia	Nomioides ino	Animalia	Arthropoda	Insecta	Hymenoptera	Halictidae	Nomioidinae	Nomioides	ino		(Nurse, 1904)	R. Murao	2012	R. Murao	26/08/2002	CN	Ili Prov.	CN11	West of Kuitun, alt. 560 m, Ili Prov., Xinjiang Uygur Aut. Reg.	83.9667	44.4333	F	host: Chondrilla sp.	1
BeeCAsia0009378	BeeCAsia 28	28/5/2017	ELKU	BeeCAsia	Nomioides ino	Animalia	Arthropoda	Insecta	Hymenoptera	Halictidae	Nomioidinae	Nomioides	ino		(Nurse, 1904)	R. Murao	2012	R. Murao	26/08/2002	CN	Ili Prov.	CN11	West of Kuitun, alt. 560 m, Ili Prov., Xinjiang Uygur Aut. Reg.	83.9667	44.4333	F	host: Chondrilla sp.	1
BeeCAsia0009373	BeeCAsia 28	28/5/2017	ELKU	BeeCAsia	Nomioides ino	Animalia	Arthropoda	Insecta	Hymenoptera	Halictidae	Nomioidinae	Nomioides	ino		(Nurse, 1904)	R. Murao	2012	R. Murao	22/08/2002	CN	Changji Prov.	CN3	Fukang, alt. 520m, Changji Prov., Xinjiang Uygur Aut. Reg.			F	host: Tamarix sp.	1
BeeCAsia0009330	BeeCAsia 28	28/5/2017	ELKU	BeeCAsia	Nomioides minutissimus minutissimus	Animalia	Arthropoda	Insecta	Hymenoptera	Halictidae	Nomioidinae	Nomioides	minutissimus	minutissimus	(Rossi, 1790)	R. Murao	2012	R. Murao	22/08/2002	CN	Changji Prov.	CN3	Fukang, alt. 520m, Changji Prov., Xinjiang Uygur Aut. Reg.			F	host: Tamarix sp.	1
BeeCAsia0009331	BeeCAsia 28	28/5/2017	ELKU	BeeCAsia	Nomioides minutissimus minutissimus	Animalia	Arthropoda	Insecta	Hymenoptera	Halictidae	Nomioidinae	Nomioides	minutissimus	minutissimus	(Rossi, 1790)	R. Murao	2012	R. Murao	22/08/2002	CN	Changji Prov.	CN3	Fukang, alt. 520m, Changji Prov., Xinjiang Uygur Aut. Reg.			F	host: Tamarix sp.	1
BeeCAsia0009332	BeeCAsia 28	28/5/2017	ELKU	BeeCAsia	Nomioides minutissimus minutissimus	Animalia	Arthropoda	Insecta	Hymenoptera	Halictidae	Nomioidinae	Nomioides	minutissimus	minutissimus	(Rossi, 1790)	R. Murao	2012	R. Murao	22/08/2002	CN	Changji Prov.	CN3	Fukang, alt. 520m, Changji Prov., Xinjiang Uygur Aut. Reg.			F	host: Tamarix sp.	1
BeeCAsia0009333	BeeCAsia 28	28/5/2017	ELKU	BeeCAsia	Nomioides minutissimus minutissimus	Animalia	Arthropoda	Insecta	Hymenoptera	Halictidae	Nomioidinae	Nomioides	minutissimus	minutissimus	(Rossi, 1790)	R. Murao	2012	R. Murao	22/08/2002	CN	Changji Prov.	CN3	Fukang, alt. 520m, Changji Prov., Xinjiang Uygur Aut. Reg.			F	host: Tamarix sp.	1
BeeCAsia0009335	BeeCAsia 28	28/5/2017	ELKU	BeeCAsia	Nomioides minutissimus minutissimus	Animalia	Arthropoda	Insecta	Hymenoptera	Halictidae	Nomioidinae	Nomioides	minutissimus	minutissimus	(Rossi, 1790)	R. Murao	2012	R. Murao	22/08/2002	CN	Changji Prov.	CN3	Fukang, alt. 520m, Changji Prov., Xinjiang Uygur Aut. Reg.			F	host: Tamarix sp.	1
BeeCAsia0009338	BeeCAsia 28	28/5/2017	ELKU	BeeCAsia	Nomioides minutissimus minutissimus	Animalia	Arthropoda	Insecta	Hymenoptera	Halictidae	Nomioidinae	Nomioides	minutissimus	minutissimus	(Rossi, 1790)	R. Murao	2012	R. Murao	22/08/2002	CN	Changji Prov.	CN3	Fukang, alt. 520m, Changji Prov., Xinjiang Uygur Aut. Reg.			F	host: Tamarix sp.	1
BeeCAsia0009326	BeeCAsia 28	28/5/2017	ELKU	BeeCAsia	Nomioides minutissimus minutissimus	Animalia	Arthropoda	Insecta	Hymenoptera	Halictidae	Nomioidinae	Nomioides	minutissimus	minutissimus	(Rossi, 1790)	R. Murao	2012	A. Dawut	22/08/2002	CN	Changji Prov.	CN3	Fukang, alt. 520m, Changji Prov., Xinjiang Uygur Aut. Reg.			F	host: Tamarix sp.	1
BeeCAsia0009327	BeeCAsia 28	28/5/2017	ELKU	BeeCAsia	Nomioides minutissimus minutissimus	Animalia	Arthropoda	Insecta	Hymenoptera	Halictidae	Nomioidinae	Nomioides	minutissimus	minutissimus	(Rossi, 1790)	R. Murao	2012	A. Dawut	22/08/2002	CN	Changji Prov.	CN3	Fukang, alt. 520m, Changji Prov., Xinjiang Uygur Aut. Reg.			F	host: Tamarix sp.	1
BeeCAsia0009329	BeeCAsia 28	28/5/2017	ELKU	BeeCAsia	Nomioides minutissimus minutissimus	Animalia	Arthropoda	Insecta	Hymenoptera	Halictidae	Nomioidinae	Nomioides	minutissimus	minutissimus	(Rossi, 1790)	R. Murao	2012	A. Dawut	22/08/2002	CN	Changji Prov.	CN3	Fukang, alt. 520m, Changji Prov., Xinjiang Uygur Aut. Reg.			F	host: Tamarix sp.	1
BeeCAsia0009343	BeeCAsia 28	28/5/2017	ELKU	BeeCAsia	Nomioides minutissimus minutissimus	Animalia	Arthropoda	Insecta	Hymenoptera	Halictidae	Nomioidinae	Nomioides	minutissimus	minutissimus	(Rossi, 1790)	R. Murao	2012	A. Dawut	22/08/2002	CN	Changji Prov.	CN3	Fukang, alt. 520m, Changji Prov., Xinjiang Uygur Aut. Reg.			F	host: Tamarix sp.	1
BeeCAsia0009382	BeeCAsia 28	28/5/2017	ELKU	BeeCAsia	Nomioides gussakouskiji	Animalia	Arthropoda	Insecta	Hymenoptera	Halictidae	Nomioidinae	Nomioides	gussakouskiji		Blüthgen, 1933	R. Murao	2012	A. Dawut	22/08/2002	CN	Changji Prov.	CN3	Fukang, alt. 520m, Changji Prov., Xinjiang Uygur Aut. Reg.			F		1
BeeCAsia0009325	BeeCAsia 28	28/5/2017	ELKU	BeeCAsia	Nomioides minutissimus minutissimus	Animalia	Arthropoda	Insecta	Hymenoptera	Halictidae	Nomioidinae	Nomioides	minutissimus	minutissimus	(Rossi, 1790)	R. Murao	2012	O. Tadauchi	22/08/2002	CN	Changji Prov.	CN3	Fukang, alt. 520m, Changji Prov., Xinjiang Uygur Aut. Reg.			F	host: Tamarix sp.	1
BeeCAsia0009328	BeeCAsia 28	28/5/2017	ELKU	BeeCAsia	Nomioides minutissimus minutissimus	Animalia	Arthropoda	Insecta	Hymenoptera	Halictidae	Nomioidinae	Nomioides	minutissimus	minutissimus	(Rossi, 1790)	R. Murao	2012	A. Dawut	26/08/2002	CN	Ili Prov.	CN4	Gaoquan, Kuitun city, Xinjiang Urgur Aut. Reg.			F		1
BeeCAsia0009379	BeeCAsia 28	28/5/2017	ELKU	BeeCAsia	Nomioides gussakouskiji	Animalia	Arthropoda	Insecta	Hymenoptera	Halictidae	Nomioidinae	Nomioides	gussakouskiji		Blüthgen, 1933	R. Murao	2012	R. Murao	15/05/2004	KZ	Jambyl Prov.	KZ32	NW of Tatti, alt. 325-562 m, Muyunkum desert Jambyl Prov.			F		1
BeeCAsia0009380	BeeCAsia 28	28/5/2017	ELKU	BeeCAsia	Nomioides gussakouskiji	Animalia	Arthropoda	Insecta	Hymenoptera	Halictidae	Nomioidinae	Nomioides	gussakouskiji		Blüthgen, 1933	R. Murao	2012	R. Murao	15/05/2004	KZ	Jambyl Prov.	KZ32	NW of Tatti, alt. 325-562 m, Muyunkum desert Jambyl Prov.			F		1
BeeCAsia0009381	BeeCAsia 28	28/5/2017	ELKU	BeeCAsia	Nomioides gussakouskiji	Animalia	Arthropoda	Insecta	Hymenoptera	Halictidae	Nomioidinae	Nomioides	gussakouskiji		Blüthgen, 1933	R. Murao	2012	R. Murao	15/05/2004	KZ	Jambyl Prov.	KZ32	NW of Tatti, alt. 325-562 m, Muyunkum desert Jambyl Prov.			F		1
BeeCAsia0009342	BeeCAsia 28	28/5/2017	ELKU	BeeCAsia	Nomioides minutissimus minutissimus	Animalia	Arthropoda	Insecta	Hymenoptera	Halictidae	Nomioidinae	Nomioides	minutissimus	minutissimus	(Rossi, 1790)	R. Murao	2012	R. Murao	03/05/2004	KZ	South Kazakhstan Prov.	KZ64	Sutkent village, North of Kamsomolskoe, South Kazakhstan Prov.			F		1
BeeCAsia0010468	BeeCAsia 32	28/5/2017	ELKU	BeeCAsia	Halictus (Tytthalictus) palustris	Animalia	Arthropoda	Insecta	Hymenoptera	Halictidae	Halictinae	Halictus	palustris		Morawitz, 1876	R. Murao	2012	O. Tadauchi	05/09/2002	KZ	South Kazakhstan Prov.	KZ66	Ulken-Kaindy, Jabagly, alt. 1090-2000 m, South Kazakhstan Prov.			F	host: Mentha asiatica	1
BeeCAsia0009527	BeeCAsia 31	28/5/2017	ELKU	BeeCAsia	Halictus (Halictus) brunnescens	Animalia	Arthropoda	Insecta	Hymenoptera	Halictidae	Halictinae	Halictus	brunnescens		(Eversmann, 1852)	R. Murao	2012	O. Tadauchi	05/09/2002	KZ	South Kazakhstan Prov.	KZ66	Ulken-Kaindy, Jabagly, alt. 1090-2000 m, South Kazakhstan Prov.			F	host: Mentha asiatica	1
BeeCAsia0009528	BeeCAsia 31	28/5/2017	ELKU	BeeCAsia	Halictus (Halictus) brunnescens	Animalia	Arthropoda	Insecta	Hymenoptera	Halictidae	Halictinae	Halictus	brunnescens		(Eversmann, 1852)	R. Murao	2012	O. Tadauchi	05/09/2002	KZ	South Kazakhstan Prov.	KZ66	Ulken-Kaindy, Jabagly, alt. 1090-2000 m, South Kazakhstan Prov.			F	host: Mentha asiatica	1
BeeCAsia0009529	BeeCAsia 31	28/5/2017	ELKU	BeeCAsia	Halictus (Halictus) brunnescens	Animalia	Arthropoda	Insecta	Hymenoptera	Halictidae	Halictinae	Halictus	brunnescens		(Eversmann, 1852)	R. Murao	2012	O. Tadauchi	05/09/2002	KZ	South Kazakhstan Prov.	KZ66	Ulken-Kaindy, Jabagly, alt. 1090-2000 m, South Kazakhstan Prov.			F	host: Mentha asiatica	1
BeeCAsia0009530	BeeCAsia 31	28/5/2017	ELKU	BeeCAsia	Halictus (Halictus) brunnescens	Animalia	Arthropoda	Insecta	Hymenoptera	Halictidae	Halictinae	Halictus	brunnescens		(Eversmann, 1852)	R. Murao	2012	O. Tadauchi	05/09/2002	KZ	South Kazakhstan Prov.	KZ66	Ulken-Kaindy, Jabagly, alt. 1090-2000 m, South Kazakhstan Prov.			F	host: Mentha asiatica	1
BeeCAsia0009531	BeeCAsia 31	28/5/2017	ELKU	BeeCAsia	Halictus (Halictus) brunnescens	Animalia	Arthropoda	Insecta	Hymenoptera	Halictidae	Halictinae	Halictus	brunnescens		(Eversmann, 1852)	R. Murao	2012	O. Tadauchi	05/09/2002	KZ	South Kazakhstan Prov.	KZ66	Ulken-Kaindy, Jabagly, alt. 1090-2000 m, South Kazakhstan Prov.			F	host: Mentha asiatica	1
BeeCAsia0009532	BeeCAsia 31	28/5/2017	ELKU	BeeCAsia	Halictus (Halictus) brunnescens	Animalia	Arthropoda	Insecta	Hymenoptera	Halictidae	Halictinae	Halictus	brunnescens		(Eversmann, 1852)	R. Murao	2012	O. Tadauchi	05/09/2002	KZ	South Kazakhstan Prov.	KZ66	Ulken-Kaindy, Jabagly, alt. 1090-2000 m, South Kazakhstan Prov.			F	host: Mentha asiatica	1
BeeCAsia0009533	BeeCAsia 31	28/5/2017	ELKU	BeeCAsia	Halictus (Halictus) brunnescens	Animalia	Arthropoda	Insecta	Hymenoptera	Halictidae	Halictinae	Halictus	brunnescens		(Eversmann, 1852)	R. Murao	2012	O. Tadauchi	05/09/2002	KZ	South Kazakhstan Prov.	KZ66	Ulken-Kaindy, Jabagly, alt. 1090-2000 m, South Kazakhstan Prov.			F	host: Mentha asiatica	1
BeeCAsia0009534	BeeCAsia 31	28/5/2017	ELKU	BeeCAsia	Halictus (Halictus) brunnescens	Animalia	Arthropoda	Insecta	Hymenoptera	Halictidae	Halictinae	Halictus	brunnescens		(Eversmann, 1852)	R. Murao	2012	O. Tadauchi	05/09/2002	KZ	South Kazakhstan Prov.	KZ66	Ulken-Kaindy, Jabagly, alt. 1090-2000 m, South Kazakhstan Prov.			F	host: Mentha asiatica	1
BeeCAsia0009535	BeeCAsia 31	28/5/2017	ELKU	BeeCAsia	Halictus (Halictus) brunnescens	Animalia	Arthropoda	Insecta	Hymenoptera	Halictidae	Halictinae	Halictus	brunnescens		(Eversmann, 1852)	R. Murao	2012	O. Tadauchi	05/09/2002	KZ	South Kazakhstan Prov.	KZ66	Ulken-Kaindy, Jabagly, alt. 1090-2000 m, South Kazakhstan Prov.			F	host: Mentha asiatica	1
BeeCAsia0009536	BeeCAsia 31	28/5/2017	ELKU	BeeCAsia	Halictus (Halictus) brunnescens	Animalia	Arthropoda	Insecta	Hymenoptera	Halictidae	Halictinae	Halictus	brunnescens		(Eversmann, 1852)	R. Murao	2012	O. Tadauchi	05/09/2002	KZ	South Kazakhstan Prov.	KZ66	Ulken-Kaindy, Jabagly, alt. 1090-2000 m, South Kazakhstan Prov.			F	host: Mentha asiatica	1
BeeCAsia0009537	BeeCAsia 31	28/5/2017	ELKU	BeeCAsia	Halictus (Halictus) brunnescens	Animalia	Arthropoda	Insecta	Hymenoptera	Halictidae	Halictinae	Halictus	brunnescens		(Eversmann, 1852)	R. Murao	2012	O. Tadauchi	05/09/2002	KZ	South Kazakhstan Prov.	KZ66	Ulken-Kaindy, Jabagly, alt. 1090-2000 m, South Kazakhstan Prov.			F	host: Mentha asiatica	1
BeeCAsia0009540	BeeCAsia 31	28/5/2017	ELKU	BeeCAsia	Halictus (Halictus) brunnescens	Animalia	Arthropoda	Insecta	Hymenoptera	Halictidae	Halictinae	Halictus	brunnescens		(Eversmann, 1852)	R. Murao	2012	O. Tadauchi	05/09/2002	KZ	South Kazakhstan Prov.	KZ66	Ulken-Kaindy, Jabagly, alt. 1090-2000 m, South Kazakhstan Prov.			F	host: Mentha asiatica	1
BeeCAsia0009541	BeeCAsia 31	28/5/2017	ELKU	BeeCAsia	Halictus (Halictus) brunnescens	Animalia	Arthropoda	Insecta	Hymenoptera	Halictidae	Halictinae	Halictus	brunnescens		(Eversmann, 1852)	R. Murao	2012	O. Tadauchi	05/09/2002	KZ	South Kazakhstan Prov.	KZ66	Ulken-Kaindy, Jabagly, alt. 1090-2000 m, South Kazakhstan Prov.			F	host: Mentha asiatica	1
BeeCAsia0009544	BeeCAsia 31	28/5/2017	ELKU	BeeCAsia	Halictus (Halictus) brunnescens	Animalia	Arthropoda	Insecta	Hymenoptera	Halictidae	Halictinae	Halictus	brunnescens		(Eversmann, 1852)	R. Murao	2012	O. Tadauchi	05/09/2002	KZ	South Kazakhstan Prov.	KZ66	Ulken-Kaindy, Jabagly, alt. 1090-2000 m, South Kazakhstan Prov.			F	host: Mentha asiatica	1
BeeCAsia0009545	BeeCAsia 31	28/5/2017	ELKU	BeeCAsia	Halictus (Halictus) brunnescens	Animalia	Arthropoda	Insecta	Hymenoptera	Halictidae	Halictinae	Halictus	brunnescens		(Eversmann, 1852)	R. Murao	2012	O. Tadauchi	05/09/2002	KZ	South Kazakhstan Prov.	KZ66	Ulken-Kaindy, Jabagly, alt. 1090-2000 m, South Kazakhstan Prov.			F	host: Mentha asiatica	1
BeeCAsia0009551	BeeCAsia 31	28/5/2017	ELKU	BeeCAsia	Halictus (Halictus) brunnescens	Animalia	Arthropoda	Insecta	Hymenoptera	Halictidae	Halictinae	Halictus	brunnescens		(Eversmann, 1852)	R. Murao	2012	O. Tadauchi	05/09/2002	KZ	South Kazakhstan Prov.	KZ66	Ulken-Kaindy, Jabagly, alt. 1090-2000 m, South Kazakhstan Prov.			F	host: Mentha asiatica	1
BeeCAsia0009552	BeeCAsia 31	28/5/2017	ELKU	BeeCAsia	Halictus (Halictus) brunnescens	Animalia	Arthropoda	Insecta	Hymenoptera	Halictidae	Halictinae	Halictus	brunnescens		(Eversmann, 1852)	R. Murao	2012	O. Tadauchi	05/09/2002	KZ	South Kazakhstan Prov.	KZ66	Ulken-Kaindy, Jabagly, alt. 1090-2000 m, South Kazakhstan Prov.			F	host: Mentha asiatica	1
BeeCAsia0009553	BeeCAsia 31	28/5/2017	ELKU	BeeCAsia	Halictus (Halictus) brunnescens	Animalia	Arthropoda	Insecta	Hymenoptera	Halictidae	Halictinae	Halictus	brunnescens		(Eversmann, 1852)	R. Murao	2012	O. Tadauchi	05/09/2002	KZ	South Kazakhstan Prov.	KZ66	Ulken-Kaindy, Jabagly, alt. 1090-2000 m, South Kazakhstan Prov.			F	host: Mentha asiatica	1
BeeCAsia0009554	BeeCAsia 31	28/5/2017	ELKU	BeeCAsia	Halictus (Halictus) brunnescens	Animalia	Arthropoda	Insecta	Hymenoptera	Halictidae	Halictinae	Halictus	brunnescens		(Eversmann, 1852)	R. Murao	2012	O. Tadauchi	05/09/2002	KZ	South Kazakhstan Prov.	KZ66	Ulken-Kaindy, Jabagly, alt. 1090-2000 m, South Kazakhstan Prov.			F	host: Mentha asiatica	1
BeeCAsia0009555	BeeCAsia 31	28/5/2017	ELKU	BeeCAsia	Halictus (Halictus) brunnescens	Animalia	Arthropoda	Insecta	Hymenoptera	Halictidae	Halictinae	Halictus	brunnescens		(Eversmann, 1852)	R. Murao	2012	O. Tadauchi	05/09/2002	KZ	South Kazakhstan Prov.	KZ66	Ulken-Kaindy, Jabagly, alt. 1090-2000 m, South Kazakhstan Prov.			F	host: Mentha asiatica	1
BeeCAsia0009556	BeeCAsia 31	28/5/2017	ELKU	BeeCAsia	Halictus (Halictus) brunnescens	Animalia	Arthropoda	Insecta	Hymenoptera	Halictidae	Halictinae	Halictus	brunnescens		(Eversmann, 1852)	R. Murao	2012	O. Tadauchi	05/09/2002	KZ	South Kazakhstan Prov.	KZ66	Ulken-Kaindy, Jabagly, alt. 1090-2000 m, South Kazakhstan Prov.			F	host: Mentha asiatica	1
BeeCAsia0009557	BeeCAsia 31	28/5/2017	ELKU	BeeCAsia	Halictus (Halictus) brunnescens	Animalia	Arthropoda	Insecta	Hymenoptera	Halictidae	Halictinae	Halictus	brunnescens		(Eversmann, 1852)	R. Murao	2012	O. Tadauchi	05/09/2002	KZ	South Kazakhstan Prov.	KZ66	Ulken-Kaindy, Jabagly, alt. 1090-2000 m, South Kazakhstan Prov.			F	host: Mentha asiatica	1
BeeCAsia0009558	BeeCAsia 31	28/5/2017	ELKU	BeeCAsia	Halictus (Halictus) brunnescens	Animalia	Arthropoda	Insecta	Hymenoptera	Halictidae	Halictinae	Halictus	brunnescens		(Eversmann, 1852)	R. Murao	2012	O. Tadauchi	05/09/2002	KZ	South Kazakhstan Prov.	KZ66	Ulken-Kaindy, Jabagly, alt. 1090-2000 m, South Kazakhstan Prov.			F	host: Mentha asiatica	1
BeeCAsia0009559	BeeCAsia 31	28/5/2017	ELKU	BeeCAsia	Halictus (Halictus) brunnescens	Animalia	Arthropoda	Insecta	Hymenoptera	Halictidae	Halictinae	Halictus	brunnescens		(Eversmann, 1852)	R. Murao	2012	O. Tadauchi	05/09/2002	KZ	South Kazakhstan Prov.	KZ66	Ulken-Kaindy, Jabagly, alt. 1090-2000 m, South Kazakhstan Prov.			F	host: Mentha asiatica	1
BeeCAsia0009560	BeeCAsia 31	28/5/2017	ELKU	BeeCAsia	Halictus (Halictus) brunnescens	Animalia	Arthropoda	Insecta	Hymenoptera	Halictidae	Halictinae	Halictus	brunnescens		(Eversmann, 1852)	R. Murao	2012	O. Tadauchi	05/09/2002	KZ	South Kazakhstan Prov.	KZ66	Ulken-Kaindy, Jabagly, alt. 1090-2000 m, South Kazakhstan Prov.			F	host: Mentha asiatica	1
BeeCAsia0009561	BeeCAsia 31	28/5/2017	ELKU	BeeCAsia	Halictus (Halictus) brunnescens	Animalia	Arthropoda	Insecta	Hymenoptera	Halictidae	Halictinae	Halictus	brunnescens		(Eversmann, 1852)	R. Murao	2012	O. Tadauchi	05/09/2002	KZ	South Kazakhstan Prov.	KZ66	Ulken-Kaindy, Jabagly, alt. 1090-2000 m, South Kazakhstan Prov.			F	host: Mentha asiatica	1
BeeCAsia0009562	BeeCAsia 31	28/5/2017	ELKU	BeeCAsia	Halictus (Halictus) brunnescens	Animalia	Arthropoda	Insecta	Hymenoptera	Halictidae	Halictinae	Halictus	brunnescens		(Eversmann, 1852)	R. Murao	2012	O. Tadauchi	05/09/2002	KZ	South Kazakhstan Prov.	KZ66	Ulken-Kaindy, Jabagly, alt. 1090-2000 m, South Kazakhstan Prov.			F	host: Mentha asiatica	1
BeeCAsia0009563	BeeCAsia 31	28/5/2017	ELKU	BeeCAsia	Halictus (Halictus) brunnescens	Animalia	Arthropoda	Insecta	Hymenoptera	Halictidae	Halictinae	Halictus	brunnescens		(Eversmann, 1852)	R. Murao	2012	O. Tadauchi	05/09/2002	KZ	South Kazakhstan Prov.	KZ66	Ulken-Kaindy, Jabagly, alt. 1090-2000 m, South Kazakhstan Prov.			F	host: Mentha asiatica	1
BeeCAsia0009564	BeeCAsia 31	28/5/2017	ELKU	BeeCAsia	Halictus (Halictus) brunnescens	Animalia	Arthropoda	Insecta	Hymenoptera	Halictidae	Halictinae	Halictus	brunnescens		(Eversmann, 1852)	R. Murao	2012	O. Tadauchi	05/09/2002	KZ	South Kazakhstan Prov.	KZ66	Ulken-Kaindy, Jabagly, alt. 1090-2000 m, South Kazakhstan Prov.			F	host: Mentha asiatica	1
BeeCAsia0009565	BeeCAsia 31	28/5/2017	ELKU	BeeCAsia	Halictus (Halictus) brunnescens	Animalia	Arthropoda	Insecta	Hymenoptera	Halictidae	Halictinae	Halictus	brunnescens		(Eversmann, 1852)	R. Murao	2012	O. Tadauchi	05/09/2002	KZ	South Kazakhstan Prov.	KZ66	Ulken-Kaindy, Jabagly, alt. 1090-2000 m, South Kazakhstan Prov.			F	host: Mentha asiatica	1
BeeCAsia0009538	BeeCAsia 31	28/5/2017	ELKU	BeeCAsia	Halictus (Halictus) brunnescens	Animalia	Arthropoda	Insecta	Hymenoptera	Halictidae	Halictinae	Halictus	brunnescens		(Eversmann, 1852)	R. Murao	2012	O. Tadauchi	07/09/2002	KZ	South Kazakhstan Prov.	KZ51	Karaalma alt. 1210 m, Near Jabagly, South Kazakhstan Prov.			F	host: Mentha asiatica	1
BeeCAsia0010188	BeeCAsia 31	28/5/2017	ELKU	BeeCAsia	Halictus (Halictus) brunnescens	Animalia	Arthropoda	Insecta	Hymenoptera	Halictidae	Halictinae	Halictus	brunnescens		(Eversmann, 1852)	R. Murao	2012	R. Murao	01/09/2002	KZ	Almaty Prov.	KZ13	Big Almaty Lake, alt. 1230-2050 m, Almaty Prov.			F		1
BeeCAsia0010440	BeeCAsia 39	28/5/2017	ELKU	BeeCAsia	Halictus (Hexataenites) resurgens	Animalia	Arthropoda	Insecta	Hymenoptera	Halictidae	Halictinae	Halictus	resurgens		Nurse, 1903	R. Murao	2012	O. Tadauchi	04/09/2002	KZ	South Kazakhstan Prov.	KZ37	Aksu Jabagly, alt. 1080-1830 m, South Kazakhstan Prov.			F	host: Mentha asiatica	1
BeeCAsia0011504	BeeCAsia 21	28/5/2017	ELKU	BeeCAsia	Halictus (Seladonia) seladonius	Animalia	Arthropoda	Insecta	Hymenoptera	Halictidae	Halictinae	Halictus	seladonius		(Fabricius, 1794)	R. Murao	2012	O. Tadauchi	14/06/2003	KZ	South Kazakhstan Prov.	KZ37	Aksu Jabagly, alt. 1080-1830 m, South Kazakhstan Prov.			F		1
BeeCAsia0009574	BeeCAsia 31	28/5/2017	ELKU	BeeCAsia	Halictus (Halictus) brunnescens	Animalia	Arthropoda	Insecta	Hymenoptera	Halictidae	Halictinae	Halictus	brunnescens		(Eversmann, 1852)	R. Murao	2012	R. Miyanaga	05/09/2002	KZ	South Kazakhstan Prov.	KZ66	Ulken-Kaindy, Jabagly, alt. 1090-2000 m, South Kazakhstan Prov.			F	host: Mentha asiatica	1
BeeCAsia0009630	BeeCAsia 31	28/5/2017	ELKU	BeeCAsia	Halictus (Halictus) brunnescens	Animalia	Arthropoda	Insecta	Hymenoptera	Halictidae	Halictinae	Halictus	brunnescens		(Eversmann, 1852)	R. Murao	2012	R. Miyanaga	05/09/2002	KZ	South Kazakhstan Prov.	KZ66	Ulken-Kaindy, Jabagly, alt. 1090-2000 m, South Kazakhstan Prov.			F	host: Mentha asiatica	1
BeeCAsia0009631	BeeCAsia 31	28/5/2017	ELKU	BeeCAsia	Halictus (Halictus) brunnescens	Animalia	Arthropoda	Insecta	Hymenoptera	Halictidae	Halictinae	Halictus	brunnescens		(Eversmann, 1852)	R. Murao	2012	R. Miyanaga	05/09/2002	KZ	South Kazakhstan Prov.	KZ66	Ulken-Kaindy, Jabagly, alt. 1090-2000 m, South Kazakhstan Prov.			F	host: Mentha asiatica	1
BeeCAsia0009632	BeeCAsia 31	28/5/2017	ELKU	BeeCAsia	Halictus (Halictus) brunnescens	Animalia	Arthropoda	Insecta	Hymenoptera	Halictidae	Halictinae	Halictus	brunnescens		(Eversmann, 1852)	R. Murao	2012	R. Miyanaga	05/09/2002	KZ	South Kazakhstan Prov.	KZ66	Ulken-Kaindy, Jabagly, alt. 1090-2000 m, South Kazakhstan Prov.			F	host: Mentha asiatica	1
BeeCAsia0009633	BeeCAsia 31	28/5/2017	ELKU	BeeCAsia	Halictus (Halictus) brunnescens	Animalia	Arthropoda	Insecta	Hymenoptera	Halictidae	Halictinae	Halictus	brunnescens		(Eversmann, 1852)	R. Murao	2012	R. Miyanaga	05/09/2002	KZ	South Kazakhstan Prov.	KZ66	Ulken-Kaindy, Jabagly, alt. 1090-2000 m, South Kazakhstan Prov.			F	host: Hypochoeris sp. ?	1
BeeCAsia0009604	BeeCAsia 31	28/5/2017	ELKU	BeeCAsia	Halictus (Halictus) brunnescens	Animalia	Arthropoda	Insecta	Hymenoptera	Halictidae	Halictinae	Halictus	brunnescens		(Eversmann, 1852)	R. Murao	2012	R. Miyanaga	01/09/2002	KZ	Almaty Prov.	KZ13	Big Almaty Lake, alt. 1230-2050 m, Almaty Prov.			F	host: Cirsium sp.	1
BeeCAsia0009605	BeeCAsia 31	28/5/2017	ELKU	BeeCAsia	Halictus (Halictus) brunnescens	Animalia	Arthropoda	Insecta	Hymenoptera	Halictidae	Halictinae	Halictus	brunnescens		(Eversmann, 1852)	R. Murao	2012	R. Miyanaga	01/09/2002	KZ	Almaty Prov.	KZ13	Big Almaty Lake, alt. 1230-2050 m, Almaty Prov.			F	host: Cirsium sp.	1
BeeCAsia0009606	BeeCAsia 31	28/5/2017	ELKU	BeeCAsia	Halictus (Halictus) brunnescens	Animalia	Arthropoda	Insecta	Hymenoptera	Halictidae	Halictinae	Halictus	brunnescens		(Eversmann, 1852)	R. Murao	2012	R. Miyanaga	01/09/2002	KZ	Almaty Prov.	KZ13	Big Almaty Lake, alt. 1230-2050 m, Almaty Prov.			F	host: Cirsium sp.	1
BeeCAsia0009607	BeeCAsia 31	28/5/2017	ELKU	BeeCAsia	Halictus (Halictus) brunnescens	Animalia	Arthropoda	Insecta	Hymenoptera	Halictidae	Halictinae	Halictus	brunnescens		(Eversmann, 1852)	R. Murao	2012	R. Miyanaga	01/09/2002	KZ	Almaty Prov.	KZ13	Big Almaty Lake, alt. 1230-2050 m, Almaty Prov.			F	host: Cirsium sp.	1
BeeCAsia0009608	BeeCAsia 31	28/5/2017	ELKU	BeeCAsia	Halictus (Halictus) brunnescens	Animalia	Arthropoda	Insecta	Hymenoptera	Halictidae	Halictinae	Halictus	brunnescens		(Eversmann, 1852)	R. Murao	2012	R. Miyanaga	01/09/2002	KZ	Almaty Prov.	KZ13	Big Almaty Lake, alt. 1230-2050 m, Almaty Prov.			F	host: Cirsium sp.	1
BeeCAsia0009609	BeeCAsia 31	28/5/2017	ELKU	BeeCAsia	Halictus (Halictus) brunnescens	Animalia	Arthropoda	Insecta	Hymenoptera	Halictidae	Halictinae	Halictus	brunnescens		(Eversmann, 1852)	R. Murao	2012	R. Miyanaga	04/09/2002	KZ	South Kazakhstan Prov.	KZ37	Aksu Jabagly, alt. 1080-1830 m, South Kazakhstan Prov.			F	host: Asteraceae gen. et. sp.	1
BeeCAsia0024721	BeeCAsia 20	28/5/2017	ELKU	BeeCAsia	Halictus (Seladonia) pjalmensis pjalmensis	Animalia	Arthropoda	Insecta	Hymenoptera	Halictidae	Halictinae	Halictus	pjalmensis	pjalmensis	Strand, 1909	R. Murao	2012	R. Miyanaga	05/09/2002	KZ	South Kazakhstan Prov.	KZ66	Ulken-Kaindy, Jabagly, alt. 1090-2000 m, South Kazakhstan Prov.			F	host: Hypochoeris sp. ?	1
BeeCAsia0009613	BeeCAsia 31	28/5/2017	ELKU	BeeCAsia	Halictus (Halictus) brunnescens	Animalia	Arthropoda	Insecta	Hymenoptera	Halictidae	Halictinae	Halictus	brunnescens		(Eversmann, 1852)	R. Murao	2012	O. Tadauchi	07/09/2002	KZ	South Kazakhstan Prov.	KZ37	Aksu Jabagly, alt. 1080-1830 m, South Kazakhstan Prov.			F	host: Chondrilla sp.	1
BeeCAsia0011165	BeeCAsia 19	28/5/2017	ELKU	BeeCAsia	Halictus (Mucoreohalictus) mucidus	Animalia	Arthropoda	Insecta	Hymenoptera	Halictidae	Halictinae	Halictus	mucidus		Blüthgen, 1923	R. Murao	2012	O. Tadauchi	05/09/2002	KZ	South Kazakhstan Prov.	KZ66	Ulken-Kaindy, Jabagly, alt. 1090-2000 m, South Kazakhstan Prov.			F	host: Mentha asiatica	1
BeeCAsia0024722	BeeCAsia 20	28/5/2017	ELKU	BeeCAsia	Halictus (Seladonia) pjalmensis pjalmensis	Animalia	Arthropoda	Insecta	Hymenoptera	Halictidae	Halictinae	Halictus	pjalmensis	pjalmensis	Strand, 1909	R. Murao	2012	R. Murao	05/09/2002	KZ	South Kazakhstan Prov.	KZ66	Ulken-Kaindy, Jabagly, alt. 1090-2000 m, South Kazakhstan Prov.			F	host: Asteraceae gen. et. sp.	1
BeeCAsia0009615	BeeCAsia 31	28/5/2017	ELKU	BeeCAsia	Halictus (Halictus) brunnescens	Animalia	Arthropoda	Insecta	Hymenoptera	Halictidae	Halictinae	Halictus	brunnescens		(Eversmann, 1852)	R. Murao	2012	R. Murao	03/09/2002	KZ	South Kazakhstan Prov.	KZ37	Aksu Jabagly, alt. 1080-1830 m, South Kazakhstan Prov.			F		1
BeeCAsia0009616	BeeCAsia 31	28/5/2017	ELKU	BeeCAsia	Halictus (Halictus) brunnescens	Animalia	Arthropoda	Insecta	Hymenoptera	Halictidae	Halictinae	Halictus	brunnescens		(Eversmann, 1852)	R. Murao	2012	R. Murao	03/09/2002	KZ	South Kazakhstan Prov.	KZ37	Aksu Jabagly, alt. 1080-1830 m, South Kazakhstan Prov.			F		1
BeeCAsia0010187	BeeCAsia 31	28/5/2017	ELKU	BeeCAsia	Halictus (Halictus) brunnescens	Animalia	Arthropoda	Insecta	Hymenoptera	Halictidae	Halictinae	Halictus	brunnescens		(Eversmann, 1852)	R. Murao	2012	R. Murao	07/09/2002	KZ	South Kazakhstan Prov.	KZ37	Aksu Jabagly, alt. 1080-1830 m, South Kazakhstan Prov.			F	host: Polygonaceae gen. et. sp.	1
BeeCAsia0009617	BeeCAsia 31	28/5/2017	ELKU	BeeCAsia	Halictus (Halictus) brunnescens	Animalia	Arthropoda	Insecta	Hymenoptera	Halictidae	Halictinae	Halictus	brunnescens		(Eversmann, 1852)	R. Murao	2012	R. Murao	07/09/2002	KZ	South Kazakhstan Prov.	KZ37	Aksu Jabagly, alt. 1080-1830 m, South Kazakhstan Prov.			F	host: Polygonaceae gen. et. sp.	1
BeeCAsia0009584	BeeCAsia 31	28/5/2017	ELKU	BeeCAsia	Halictus (Halictus) brunnescens	Animalia	Arthropoda	Insecta	Hymenoptera	Halictidae	Halictinae	Halictus	brunnescens		(Eversmann, 1852)	R. Murao	2012	R. Murao	04/09/2002	KZ	South Kazakhstan Prov.	KZ37	Aksu Jabagly, alt. 1080-1830 m, South Kazakhstan Prov.			F	host: Asteraceae gen. et. sp.	1
BeeCAsia0010189	BeeCAsia 31	28/5/2017	ELKU	BeeCAsia	Halictus (Halictus) brunnescens	Animalia	Arthropoda	Insecta	Hymenoptera	Halictidae	Halictinae	Halictus	brunnescens		(Eversmann, 1852)	R. Murao	2012	R. Murao	01/09/2002	KZ	Almaty Prov.	KZ13	Big Almaty Lake, alt. 1230-2050 m, Almaty Prov.			F		1
BeeCAsia0009539	BeeCAsia 31	28/5/2017	ELKU	BeeCAsia	Halictus (Halictus) brunnescens	Animalia	Arthropoda	Insecta	Hymenoptera	Halictidae	Halictinae	Halictus	brunnescens		(Eversmann, 1852)	R. Murao	2012	R. Murao	01/09/2002	KZ	Almaty Prov.	KZ13	Big Almaty Lake, alt. 1230-2050 m, Almaty Prov.			F		1
BeeCAsia0009585	BeeCAsia 31	28/5/2017	ELKU	BeeCAsia	Halictus (Halictus) brunnescens	Animalia	Arthropoda	Insecta	Hymenoptera	Halictidae	Halictinae	Halictus	brunnescens		(Eversmann, 1852)	R. Murao	2012	R. Murao	01/09/2002	KZ	Almaty Prov.	KZ13	Big Almaty Lake, alt. 1230-2050 m, Almaty Prov.			F		1
BeeCAsia0010032	BeeCAsia 32	28/5/2017	ELKU	BeeCAsia	Halictus (Tytthalictus) palustris	Animalia	Arthropoda	Insecta	Hymenoptera	Halictidae	Halictinae	Halictus	palustris		Morawitz, 1876	R. Murao	2012	R. Murao	05/09/2002	KZ	South Kazakhstan Prov.	KZ66	Ulken-Kaindy, Jabagly, alt. 1090-2000 m, South Kazakhstan Prov.			F	host: Umbelliferae sp.	1
BeeCAsia0009588	BeeCAsia 31	28/5/2017	ELKU	BeeCAsia	Halictus (Halictus) brunnescens	Animalia	Arthropoda	Insecta	Hymenoptera	Halictidae	Halictinae	Halictus	brunnescens		(Eversmann, 1852)	R. Murao	2012	R. Murao	05/09/2002	KZ	South Kazakhstan Prov.	KZ66	Ulken-Kaindy, Jabagly, alt. 1090-2000 m, South Kazakhstan Prov.			F	host: Umbelliferae sp.	1
BeeCAsia0009589	BeeCAsia 31	28/5/2017	ELKU	BeeCAsia	Halictus (Halictus) brunnescens	Animalia	Arthropoda	Insecta	Hymenoptera	Halictidae	Halictinae	Halictus	brunnescens		(Eversmann, 1852)	R. Murao	2012	R. Murao	05/09/2002	KZ	South Kazakhstan Prov.	KZ66	Ulken-Kaindy, Jabagly, alt. 1090-2000 m, South Kazakhstan Prov.			F		1
BeeCAsia0009590	BeeCAsia 31	28/5/2017	ELKU	BeeCAsia	Halictus (Halictus) brunnescens	Animalia	Arthropoda	Insecta	Hymenoptera	Halictidae	Halictinae	Halictus	brunnescens		(Eversmann, 1852)	R. Murao	2012	R. Murao	05/09/2002	KZ	South Kazakhstan Prov.	KZ66	Ulken-Kaindy, Jabagly, alt. 1090-2000 m, South Kazakhstan Prov.			F		1
BeeCAsia0009627	BeeCAsia 31	28/5/2017	ELKU	BeeCAsia	Halictus (Halictus) brunnescens	Animalia	Arthropoda	Insecta	Hymenoptera	Halictidae	Halictinae	Halictus	brunnescens		(Eversmann, 1852)	R. Murao	2012	R. Murao	05/09/2002	KZ	South Kazakhstan Prov.	KZ66	Ulken-Kaindy, Jabagly, alt. 1090-2000 m, South Kazakhstan Prov.			F	host: Echinops sp.	1
BeeCAsia0010122	BeeCAsia 32	28/5/2017	ELKU	BeeCAsia	Halictus (Monilapis) compressus transvolgensis	Animalia	Arthropoda	Insecta	Hymenoptera	Halictidae	Halictinae	Halictus	compressus	transvolgensis	Pesenko, 1985	R. Murao	2012	R. Murao	05/09/2002	KZ	South Kazakhstan Prov.	KZ66	Ulken-Kaindy, Jabagly, alt. 1090-2000 m, South Kazakhstan Prov.			F	host: Asteraceae gen. et. sp.	1
BeeCAsia0010294	BeeCAsia 39	28/5/2017	ELKU	BeeCAsia	Halictus (Platyhalictus) minor	Animalia	Arthropoda	Insecta	Hymenoptera	Halictidae	Halictinae	Halictus	minor		Morawitz, 1876	R. Murao	2012	K. Mitai	08/06/2003	KZ	South Kazakhstan Prov.	KZ63	Shayan-Birlik, South Kazakhstan Prov.			F	host: Ferula tenuisecta	1
BeeCAsia0009594	BeeCAsia 31	28/5/2017	ELKU	BeeCAsia	Halictus (Halictus) brunnescens	Animalia	Arthropoda	Insecta	Hymenoptera	Halictidae	Halictinae	Halictus	brunnescens		(Eversmann, 1852)	R. Murao	2012	K. Mitai	08/06/2003	KZ	South Kazakhstan Prov.	KZ63	Shayan-Birlik, South Kazakhstan Prov.			F		1
BeeCAsia0009595	BeeCAsia 31	28/5/2017	ELKU	BeeCAsia	Halictus (Halictus) brunnescens	Animalia	Arthropoda	Insecta	Hymenoptera	Halictidae	Halictinae	Halictus	brunnescens		(Eversmann, 1852)	R. Murao	2012	K. Mitai	08/06/2003	KZ	South Kazakhstan Prov.	KZ63	Shayan-Birlik, South Kazakhstan Prov.			F		1
BeeCAsia0009597	BeeCAsia 31	28/5/2017	ELKU	BeeCAsia	Halictus (Halictus) brunnescens	Animalia	Arthropoda	Insecta	Hymenoptera	Halictidae	Halictinae	Halictus	brunnescens		(Eversmann, 1852)	R. Murao	2012	K. Mitai	08/06/2003	KZ	South Kazakhstan Prov.	KZ63	Shayan-Birlik, South Kazakhstan Prov.			F	host: Cruciferae sp.	1
BeeCAsia0011492	BeeCAsia 21	28/5/2017	ELKU	BeeCAsia	Halictus (Seladonia) seladonius	Animalia	Arthropoda	Insecta	Hymenoptera	Halictidae	Halictinae	Halictus	seladonius		(Fabricius, 1794)	R. Murao	2012	K. Mitai	06/06/2003	KZ	South Kazakhstan Prov.	KZ35	Achisai, alt. 500-700 m, Mts. Karatau, South Kazakhstan Prov.			F	host: Achillea biebersteinii	1
BeeCAsia0011658	BeeCAsia 45	28/5/2017	ELKU	BeeCAsia	Lasioglossum (Hemihalictus) croceipes	Animalia	Arthropoda	Insecta	Hymenoptera	Halictidae	Halictinae	Lasioglossum	croceipes		(Morawitz, 1876)	R. Murao	2012	K. Mitai	06/06/2003	KZ	South Kazakhstan Prov.	KZ35	Achisai, alt. 500-700 m, Mts. Karatau, South Kazakhstan Prov.			F	host: Ferula tenuisecta	1
BeeCAsia0011459	BeeCAsia 20	28/5/2017	ELKU	BeeCAsia	Halictus (Seladonia) pjalmensis pjalmensis	Animalia	Arthropoda	Insecta	Hymenoptera	Halictidae	Halictinae	Halictus	pjalmensis	pjalmensis	Strand, 1909	R. Murao	2012	K. Mitai	06/06/2003	KZ	South Kazakhstan Prov.	KZ35	Achisai, alt. 500-700 m, Mts. Karatau, South Kazakhstan Prov.			F	host: Achillea biebersteinii	1
BeeCAsia0011484	BeeCAsia 21	28/5/2017	ELKU	BeeCAsia	Halictus (Seladonia) seladonius	Animalia	Arthropoda	Insecta	Hymenoptera	Halictidae	Halictinae	Halictus	seladonius		(Fabricius, 1794)	R. Murao	2012	K. Mitai	13/06/2003	KZ	South Kazakhstan Prov.	KZ42	Daubaba, alt. 700-800 m, South Kazakhstan Prov.			F		1
BeeCAsia0011486	BeeCAsia 21	28/5/2017	ELKU	BeeCAsia	Halictus (Seladonia) seladonius	Animalia	Arthropoda	Insecta	Hymenoptera	Halictidae	Halictinae	Halictus	seladonius		(Fabricius, 1794)	R. Murao	2012	K. Mitai	13/06/2003	KZ	South Kazakhstan Prov.	KZ42	Daubaba, alt. 700-800 m, South Kazakhstan Prov.			F	host: Cruciferae gen. et sp.	1
BeeCAsia0010359	BeeCAsia 32	28/5/2017	ELKU	BeeCAsia	Halictus (Monilapis) compressus transvolgensis	Animalia	Arthropoda	Insecta	Hymenoptera	Halictidae	Halictinae	Halictus	compressus	transvolgensis	Pesenko, 1985	R. Murao	2012	K. Mitai	16/06/2003	KZ	South Kazakhstan Prov.	KZ38	Aksu Valley, Jabagly, alt. 130-560 m, South Kazakhstan Prov.			F		1
BeeCAsia0010368	BeeCAsia 32	28/5/2017	ELKU	BeeCAsia	Halictus (Monilapis) compressus transvolgensis	Animalia	Arthropoda	Insecta	Hymenoptera	Halictidae	Halictinae	Halictus	compressus	transvolgensis	Pesenko, 1985	R. Murao	2012	K. Mitai	16/06/2003	KZ	South Kazakhstan Prov.	KZ38	Aksu Valley, Jabagly, alt. 130-560 m, South Kazakhstan Prov.			F		1
BeeCAsia0009567	BeeCAsia 31	28/5/2017	ELKU	BeeCAsia	Halictus (Halictus) brunnescens	Animalia	Arthropoda	Insecta	Hymenoptera	Halictidae	Halictinae	Halictus	brunnescens		(Eversmann, 1852)	R. Murao	2012	K. Mitai	12/06/2003	KZ	South Kazakhstan Prov.	KZ62	Seslavino, alt. 960 m, Daubaba river, South Kazakhstan Prov.			F		1
BeeCAsia0009568	BeeCAsia 31	28/5/2017	ELKU	BeeCAsia	Halictus (Halictus) brunnescens	Animalia	Arthropoda	Insecta	Hymenoptera	Halictidae	Halictinae	Halictus	brunnescens		(Eversmann, 1852)	R. Murao	2012	K. Mitai	18/06/2003	KZ	Jambyl Prov.	KZ19	Alga, near Koradai, Jambyl Prov.			F		1
BeeCAsia0009569	BeeCAsia 31	28/5/2017	ELKU	BeeCAsia	Halictus (Halictus) brunnescens	Animalia	Arthropoda	Insecta	Hymenoptera	Halictidae	Halictinae	Halictus	brunnescens		(Eversmann, 1852)	R. Murao	2012	K. Mitai	18/06/2003	KZ	Jambyl Prov.	KZ19	Alga, near Koradai, Jambyl Prov.			F		1
BeeCAsia0009570	BeeCAsia 31	28/5/2017	ELKU	BeeCAsia	Halictus (Halictus) brunnescens	Animalia	Arthropoda	Insecta	Hymenoptera	Halictidae	Halictinae	Halictus	brunnescens		(Eversmann, 1852)	R. Murao	2012	K. Mitai	18/06/2003	KZ	Jambyl Prov.	KZ19	Alga, near Koradai, Jambyl Prov.			F		1
BeeCAsia0009571	BeeCAsia 31	28/5/2017	ELKU	BeeCAsia	Halictus (Halictus) brunnescens	Animalia	Arthropoda	Insecta	Hymenoptera	Halictidae	Halictinae	Halictus	brunnescens		(Eversmann, 1852)	R. Murao	2012	K. Mitai	18/06/2003	KZ	Jambyl Prov.	KZ19	Alga, near Koradai, Jambyl Prov.			F		1
BeeCAsia0009572	BeeCAsia 31	28/5/2017	ELKU	BeeCAsia	Halictus (Halictus) brunnescens	Animalia	Arthropoda	Insecta	Hymenoptera	Halictidae	Halictinae	Halictus	brunnescens		(Eversmann, 1852)	R. Murao	2012	K. Mitai	18/06/2003	KZ	Jambyl Prov.	KZ19	Alga, near Koradai, Jambyl Prov.			F		1
BeeCAsia0009629	BeeCAsia 31	28/5/2017	ELKU	BeeCAsia	Halictus (Halictus) brunnescens	Animalia	Arthropoda	Insecta	Hymenoptera	Halictidae	Halictinae	Halictus	brunnescens		(Eversmann, 1852)	R. Murao	2012	R. Miyanaga	05/09/2002	KZ	South Kazakhstan Prov.	KZ66	Ulken-Kaindy, Jabagly, alt. 1090-2000 m, South Kazakhstan Prov.			F	host: Mentha asiatica	1
BeeCAsia0010415	BeeCAsia 39	28/5/2017	ELKU	BeeCAsia	Halictus (Platyhalictus) minor	Animalia	Arthropoda	Insecta	Hymenoptera	Halictidae	Halictinae	Halictus	minor		Morawitz, 1876	R. Murao	2012	O. Tadauchi	30/04/2004	KZ	South Kazakhstan Prov.	KZ56	Lake Charbarinskoe, Chordara, alt. 180 m, West of Tashkent, South Kazakhstan Prov.			F		1
BeeCAsia0009575	BeeCAsia 31	28/5/2017	ELKU	BeeCAsia	Halictus (Halictus) brunnescens	Animalia	Arthropoda	Insecta	Hymenoptera	Halictidae	Halictinae	Halictus	brunnescens		(Eversmann, 1852)	R. Murao	2012	O. Tadauchi	17/05/2004	KZ	Jambyl Prov.	KZ33	riverside, Chu R., Moyenkum, alt. 480 m, Jambyl Prov.			F		1
BeeCAsia0009576	BeeCAsia 31	28/5/2017	ELKU	BeeCAsia	Halictus (Halictus) brunnescens	Animalia	Arthropoda	Insecta	Hymenoptera	Halictidae	Halictinae	Halictus	brunnescens		(Eversmann, 1852)	R. Murao	2012	O. Tadauchi	17/05/2004	KZ	Jambyl Prov.	KZ33	riverside, Chu R., Moyenkum, alt. 480 m, Jambyl Prov.			F		1
BeeCAsia0010248	BeeCAsia 39	28/5/2017	ELKU	BeeCAsia	Halictus (Hexataenites) resurgens	Animalia	Arthropoda	Insecta	Hymenoptera	Halictidae	Halictinae	Halictus	resurgens		Nurse, 1903	R. Murao	2012	O. Tadauchi	10/05/2004	KZ	South Kazakhstan Prov.	KZ58	North of Boroldy village, Mts. Karatau, South Kazakhstan Prov.			F		1
BeeCAsia0010250	BeeCAsia 39	28/5/2017	ELKU	BeeCAsia	Halictus (Hexataenites) resurgens	Animalia	Arthropoda	Insecta	Hymenoptera	Halictidae	Halictinae	Halictus	resurgens		Nurse, 1903	R. Murao	2012	O. Tadauchi	10/05/2004	KZ	South Kazakhstan Prov.	KZ58	North of Boroldy village, Mts. Karatau, South Kazakhstan Prov.			F		1
BeeCAsia0010208	BeeCAsia 31	28/5/2017	ELKU	BeeCAsia	Halictus (Halictus) brunnescens	Animalia	Arthropoda	Insecta	Hymenoptera	Halictidae	Halictinae	Halictus	brunnescens		(Eversmann, 1852)	R. Murao	2012	O. Tadauchi	13/06/2003	KZ	South Kazakhstan Prov.	KZ42	Daubaba, alt. 700-800 m, South Kazakhstan Prov.			F	host: Fabaceae gen. et. sp.	1
BeeCAsia0011511	BeeCAsia 21	28/5/2017	ELKU	BeeCAsia	Halictus (Seladonia) seladonius	Animalia	Arthropoda	Insecta	Hymenoptera	Halictidae	Halictinae	Halictus	seladonius		(Fabricius, 1794)	R. Murao	2012	O. Tadauchi	13/06/2003	KZ	South Kazakhstan Prov.	KZ42	Daubaba, alt. 700-800 m, South Kazakhstan Prov.			F		1
BeeCAsia0009543	BeeCAsia 31	28/5/2017	ELKU	BeeCAsia	Halictus (Halictus) brunnescens	Animalia	Arthropoda	Insecta	Hymenoptera	Halictidae	Halictinae	Halictus	brunnescens		(Eversmann, 1852)	R. Murao	2012	O. Tadauchi	14/06/2003	KZ	South Kazakhstan Prov.	KZ37	Aksu Jabagly, alt. 1080-1830 m, South Kazakhstan Prov.			F		1
BeeCAsia0009546	BeeCAsia 31	28/5/2017	ELKU	BeeCAsia	Halictus (Halictus) brunnescens	Animalia	Arthropoda	Insecta	Hymenoptera	Halictidae	Halictinae	Halictus	brunnescens		(Eversmann, 1852)	R. Murao	2012	O. Tadauchi	14/06/2003	KZ	South Kazakhstan Prov.	KZ37	Aksu Jabagly, alt. 1080-1830 m, South Kazakhstan Prov.			F		1
BeeCAsia0009547	BeeCAsia 31	28/5/2017	ELKU	BeeCAsia	Halictus (Halictus) brunnescens	Animalia	Arthropoda	Insecta	Hymenoptera	Halictidae	Halictinae	Halictus	brunnescens		(Eversmann, 1852)	R. Murao	2012	O. Tadauchi	14/06/2003	KZ	South Kazakhstan Prov.	KZ37	Aksu Jabagly, alt. 1080-1830 m, South Kazakhstan Prov.			F		1
BeeCAsia0009548	BeeCAsia 31	28/5/2017	ELKU	BeeCAsia	Halictus (Halictus) brunnescens	Animalia	Arthropoda	Insecta	Hymenoptera	Halictidae	Halictinae	Halictus	brunnescens		(Eversmann, 1852)	R. Murao	2012	O. Tadauchi	14/06/2003	KZ	South Kazakhstan Prov.	KZ37	Aksu Jabagly, alt. 1080-1830 m, South Kazakhstan Prov.			F		1
BeeCAsia0009581	BeeCAsia 31	28/5/2017	ELKU	BeeCAsia	Halictus (Halictus) brunnescens	Animalia	Arthropoda	Insecta	Hymenoptera	Halictidae	Halictinae	Halictus	brunnescens		(Eversmann, 1852)	R. Murao	2012	O. Tadauchi	14/06/2003	KZ	South Kazakhstan Prov.	KZ37	Aksu Jabagly, alt. 1080-1830 m, South Kazakhstan Prov.			F		1
BeeCAsia0009582	BeeCAsia 31	28/5/2017	ELKU	BeeCAsia	Halictus (Halictus) brunnescens	Animalia	Arthropoda	Insecta	Hymenoptera	Halictidae	Halictinae	Halictus	brunnescens		(Eversmann, 1852)	R. Murao	2012	O. Tadauchi	14/06/2003	KZ	South Kazakhstan Prov.	KZ37	Aksu Jabagly, alt. 1080-1830 m, South Kazakhstan Prov.			F		1
BeeCAsia0010014	BeeCAsia 32	28/5/2017	ELKU	BeeCAsia	Halictus (Protohalictus) bucharicus	Animalia	Arthropoda	Insecta	Hymenoptera	Halictidae	Halictinae	Halictus	bucharicus		Blüthgen, 1936	R. Murao	2012	V. Lina	03/05/2004	KZ	South Kazakhstan Prov.	KZ37	Aksu Jabagly, alt. 1080-1830 m, South Kazakhstan Prov.			F		1
BeeCAsia0010234	BeeCAsia 32	28/5/2017	ELKU	BeeCAsia	Halictus (Halictus) duplocinctus	Animalia	Arthropoda	Insecta	Hymenoptera	Halictidae	Halictinae	Halictus	duplocinctus		Vachal, 1902	R. Murao	2012	O. Tadauchi	19/05/2004	KZ	Almaty Prov.	KZ16	Riverside, Ili river, Northwest of Kapchagay, Almaty Prov.			F		1
BeeCAsia0009965	BeeCAsia 39	28/5/2017	ELKU	BeeCAsia	Halictus (Hexataenites) resurgens	Animalia	Arthropoda	Insecta	Hymenoptera	Halictidae	Halictinae	Halictus	resurgens		Nurse, 1903	R. Murao	2012	O. Tadauchi	28/05/2003	KZ	South Kazakhstan Prov.	KZ37	Aksu Jabagly, alt. 1080-1830 m, South Kazakhstan Prov.			F		1
BeeCAsia0009966	BeeCAsia 39	28/5/2017	ELKU	BeeCAsia	Halictus (Hexataenites) resurgens	Animalia	Arthropoda	Insecta	Hymenoptera	Halictidae	Halictinae	Halictus	resurgens		Nurse, 1903	R. Murao	2012	O. Tadauchi	28/05/2003	KZ	South Kazakhstan Prov.	KZ37	Aksu Jabagly, alt. 1080-1830 m, South Kazakhstan Prov.			F		1
BeeCAsia0009968	BeeCAsia 39	28/5/2017	ELKU	BeeCAsia	Halictus (Hexataenites) resurgens	Animalia	Arthropoda	Insecta	Hymenoptera	Halictidae	Halictinae	Halictus	resurgens		Nurse, 1903	R. Murao	2012	O. Tadauchi	28/05/2003	KZ	South Kazakhstan Prov.	KZ37	Aksu Jabagly, alt. 1080-1830 m, South Kazakhstan Prov.			F		1
BeeCAsia0010020	BeeCAsia 32	28/5/2017	ELKU	BeeCAsia	Halictus (Tytthalictus) palustris	Animalia	Arthropoda	Insecta	Hymenoptera	Halictidae	Halictinae	Halictus	palustris		Morawitz, 1876	R. Murao	2012	O. Tadauchi	28/05/2003	KZ	South Kazakhstan Prov.	KZ37	Aksu Jabagly, alt. 1080-1830 m, South Kazakhstan Prov.			F		1
BeeCAsia0010021	BeeCAsia 32	28/5/2017	ELKU	BeeCAsia	Halictus (Tytthalictus) palustris	Animalia	Arthropoda	Insecta	Hymenoptera	Halictidae	Halictinae	Halictus	palustris		Morawitz, 1876	R. Murao	2012	O. Tadauchi	28/05/2003	KZ	South Kazakhstan Prov.	KZ37	Aksu Jabagly, alt. 1080-1830 m, South Kazakhstan Prov.			F		1
BeeCAsia0010025	BeeCAsia 32	28/5/2017	ELKU	BeeCAsia	Halictus (Tytthalictus) palustris	Animalia	Arthropoda	Insecta	Hymenoptera	Halictidae	Halictinae	Halictus	palustris		Morawitz, 1876	R. Murao	2012	O. Tadauchi	28/05/2003	KZ	South Kazakhstan Prov.	KZ37	Aksu Jabagly, alt. 1080-1830 m, South Kazakhstan Prov.			F		1
BeeCAsia0010026	BeeCAsia 32	28/5/2017	ELKU	BeeCAsia	Halictus (Tytthalictus) palustris	Animalia	Arthropoda	Insecta	Hymenoptera	Halictidae	Halictinae	Halictus	palustris		Morawitz, 1876	R. Murao	2012	O. Tadauchi	28/05/2003	KZ	South Kazakhstan Prov.	KZ37	Aksu Jabagly, alt. 1080-1830 m, South Kazakhstan Prov.			F		1
BeeCAsia0010147	BeeCAsia 32	28/5/2017	ELKU	BeeCAsia	Halictus (Monilapis) compressus transvolgensis	Animalia	Arthropoda	Insecta	Hymenoptera	Halictidae	Halictinae	Halictus	compressus	transvolgensis	Pesenko, 1985	R. Murao	2012	O. Tadauchi	28/05/2003	KZ	South Kazakhstan Prov.	KZ37	Aksu Jabagly, alt. 1080-1830 m, South Kazakhstan Prov.			F		1
BeeCAsia0010155	BeeCAsia 32	28/5/2017	ELKU	BeeCAsia	Halictus (Monilapis) compressus transvolgensis	Animalia	Arthropoda	Insecta	Hymenoptera	Halictidae	Halictinae	Halictus	compressus	transvolgensis	Pesenko, 1985	R. Murao	2012	O. Tadauchi	28/05/2003	KZ	South Kazakhstan Prov.	KZ37	Aksu Jabagly, alt. 1080-1830 m, South Kazakhstan Prov.			F		1
BeeCAsia0010156	BeeCAsia 32	28/5/2017	ELKU	BeeCAsia	Halictus (Monilapis) compressus transvolgensis	Animalia	Arthropoda	Insecta	Hymenoptera	Halictidae	Halictinae	Halictus	compressus	transvolgensis	Pesenko, 1985	R. Murao	2012	O. Tadauchi	28/05/2003	KZ	South Kazakhstan Prov.	KZ37	Aksu Jabagly, alt. 1080-1830 m, South Kazakhstan Prov.			F		1
BeeCAsia0010381	BeeCAsia 32	28/5/2017	ELKU	BeeCAsia	Halictus (Monilapis) compressus transvolgensis	Animalia	Arthropoda	Insecta	Hymenoptera	Halictidae	Halictinae	Halictus	compressus	transvolgensis	Pesenko, 1985	R. Murao	2012	O. Tadauchi	27/05/2003	KZ	South Kazakhstan Prov.	KZ37	Aksu Jabagly, alt. 1080-1830 m, South Kazakhstan Prov.			F		1
BeeCAsia0010382	BeeCAsia 32	28/5/2017	ELKU	BeeCAsia	Halictus (Monilapis) compressus transvolgensis	Animalia	Arthropoda	Insecta	Hymenoptera	Halictidae	Halictinae	Halictus	compressus	transvolgensis	Pesenko, 1985	R. Murao	2012	O. Tadauchi	27/05/2003	KZ	South Kazakhstan Prov.	KZ37	Aksu Jabagly, alt. 1080-1830 m, South Kazakhstan Prov.			F		1
BeeCAsia0010390	BeeCAsia 32	28/5/2017	ELKU	BeeCAsia	Halictus (Monilapis) compressus transvolgensis	Animalia	Arthropoda	Insecta	Hymenoptera	Halictidae	Halictinae	Halictus	compressus	transvolgensis	Pesenko, 1985	R. Murao	2012	K. Mitai	14/06/2003	KZ	South Kazakhstan Prov.	KZ37	Aksu Jabagly, alt. 1080-1830 m, South Kazakhstan Prov.			F		1
BeeCAsia0010332	BeeCAsia 32	28/5/2017	ELKU	BeeCAsia	Halictus (Protohalictus) bucharicus	Animalia	Arthropoda	Insecta	Hymenoptera	Halictidae	Halictinae	Halictus	bucharicus		Blüthgen, 1936	R. Murao	2012	O. Tadauchi	05/06/2003	KZ	South Kazakhstan Prov.	KZ35	Achisai, alt. 500-700 m, Mts. Karatau, South Kazakhstan Prov.			F		1
BeeCAsia0010333	BeeCAsia 32	28/5/2017	ELKU	BeeCAsia	Halictus (Protohalictus) bucharicus	Animalia	Arthropoda	Insecta	Hymenoptera	Halictidae	Halictinae	Halictus	bucharicus		Blüthgen, 1936	R. Murao	2012	O. Tadauchi	05/06/2003	KZ	South Kazakhstan Prov.	KZ35	Achisai, alt. 500-700 m, Mts. Karatau, South Kazakhstan Prov.			F		1
BeeCAsia0010334	BeeCAsia 32	28/5/2017	ELKU	BeeCAsia	Halictus (Protohalictus) bucharicus	Animalia	Arthropoda	Insecta	Hymenoptera	Halictidae	Halictinae	Halictus	bucharicus		Blüthgen, 1936	R. Murao	2012	O. Tadauchi	05/06/2003	KZ	South Kazakhstan Prov.	KZ35	Achisai, alt. 500-700 m, Mts. Karatau, South Kazakhstan Prov.			F		1
BeeCAsia0010335	BeeCAsia 32	28/5/2017	ELKU	BeeCAsia	Halictus (Protohalictus) bucharicus	Animalia	Arthropoda	Insecta	Hymenoptera	Halictidae	Halictinae	Halictus	bucharicus		Blüthgen, 1936	R. Murao	2012	O. Tadauchi	05/06/2003	KZ	South Kazakhstan Prov.	KZ35	Achisai, alt. 500-700 m, Mts. Karatau, South Kazakhstan Prov.			F		1
BeeCAsia0010336	BeeCAsia 32	28/5/2017	ELKU	BeeCAsia	Halictus (Protohalictus) bucharicus	Animalia	Arthropoda	Insecta	Hymenoptera	Halictidae	Halictinae	Halictus	bucharicus		Blüthgen, 1936	R. Murao	2012	O. Tadauchi	05/06/2003	KZ	South Kazakhstan Prov.	KZ35	Achisai, alt. 500-700 m, Mts. Karatau, South Kazakhstan Prov.			F		1
BeeCAsia0010337	BeeCAsia 32	28/5/2017	ELKU	BeeCAsia	Halictus (Protohalictus) bucharicus	Animalia	Arthropoda	Insecta	Hymenoptera	Halictidae	Halictinae	Halictus	bucharicus		Blüthgen, 1936	R. Murao	2012	O. Tadauchi	05/06/2003	KZ	South Kazakhstan Prov.	KZ35	Achisai, alt. 500-700 m, Mts. Karatau, South Kazakhstan Prov.			F		1
BeeCAsia0010338	BeeCAsia 32	28/5/2017	ELKU	BeeCAsia	Halictus (Protohalictus) bucharicus	Animalia	Arthropoda	Insecta	Hymenoptera	Halictidae	Halictinae	Halictus	bucharicus		Blüthgen, 1936	R. Murao	2012	O. Tadauchi	05/06/2003	KZ	South Kazakhstan Prov.	KZ35	Achisai, alt. 500-700 m, Mts. Karatau, South Kazakhstan Prov.			F		1
BeeCAsia0011663	BeeCAsia 45	28/5/2017	ELKU	BeeCAsia	Lasioglossum (Hemihalictus) croceipes	Animalia	Arthropoda	Insecta	Hymenoptera	Halictidae	Halictinae	Lasioglossum	croceipes		(Morawitz, 1876)	R. Murao	2012	K. Mitai	06/06/2003	KZ	South Kazakhstan Prov.	KZ35	Achisai, alt. 500-700 m, Mts. Karatau, South Kazakhstan Prov.			F	host: Ferula tenuisecta	1
BeeCAsia0010416	BeeCAsia 39	28/5/2017	ELKU	BeeCAsia	Halictus (Platyhalictus) minor	Animalia	Arthropoda	Insecta	Hymenoptera	Halictidae	Halictinae	Halictus	minor		Morawitz, 1876	R. Murao	2012	O. Tadauchi	01/06/2003	KZ	South Kazakhstan Prov.	KZ50	Kantagi, alt. 550-700 m, near Kentau, Mts. Karatau, South Kazakhstan Prov.			F		1
BeeCAsia0011487	BeeCAsia 21	28/5/2017	ELKU	BeeCAsia	Halictus (Seladonia) seladonius	Animalia	Arthropoda	Insecta	Hymenoptera	Halictidae	Halictinae	Halictus	seladonius		(Fabricius, 1794)	R. Murao	2012	K. Mitai	13/06/2003	KZ	South Kazakhstan Prov.	KZ42	Daubaba, alt. 700-800 m, South Kazakhstan Prov.			F	host: Schrenkia golickeana	1
BeeCAsia0010454	BeeCAsia 39	28/5/2017	ELKU	BeeCAsia	Halictus (Hexataenites) resurgens	Animalia	Arthropoda	Insecta	Hymenoptera	Halictidae	Halictinae	Halictus	resurgens		Nurse, 1903	R. Murao	2012	O. Tadauchi	30/05/2003	KZ	South Kazakhstan Prov.	KZ59	North of Chimkent, alt. 400 m, South Kazakhstan Prov.			F		1
BeeCAsia0011205	BeeCAsia 19	28/5/2017	ELKU	BeeCAsia	Halictus (Mucoreohalictus) mucidus	Animalia	Arthropoda	Insecta	Hymenoptera	Halictidae	Halictinae	Halictus	mucidus		Blüthgen, 1923	R. Murao	2012	O. Tadauchi	30/05/2003	KZ	South Kazakhstan Prov.	KZ59	North of Chimkent, alt. 400 m, South Kazakhstan Prov.			F		1
BeeCAsia0010453	BeeCAsia 39	28/5/2017	ELKU	BeeCAsia	Halictus (Hexataenites) resurgens	Animalia	Arthropoda	Insecta	Hymenoptera	Halictidae	Halictinae	Halictus	resurgens		Nurse, 1903	R. Murao	2012	O. Tadauchi	30/05/2003	KZ	South Kazakhstan Prov.	KZ44	East of Chimkent, alt. 570m, South Kazakhstan Prov.			F		1
BeeCAsia0010455	BeeCAsia 39	28/5/2017	ELKU	BeeCAsia	Halictus (Hexataenites) resurgens	Animalia	Arthropoda	Insecta	Hymenoptera	Halictidae	Halictinae	Halictus	resurgens		Nurse, 1903	R. Murao	2012	O. Tadauchi	30/05/2003	KZ	South Kazakhstan Prov.	KZ44	East of Chimkent, alt. 570m, South Kazakhstan Prov.			F		1
BeeCAsia0010479	BeeCAsia 32	28/5/2017	ELKU	BeeCAsia	Halictus (Argalictus) senilis	Animalia	Arthropoda	Insecta	Hymenoptera	Halictidae	Halictinae	Halictus	senilis		(Eversmann, 1852)	R. Murao	2012	O. Tadauchi	30/04/2004	KZ	South Kazakhstan Prov.	KZ56	Lake Charbarinskoe, Chordara, alt. 180 m, West of Tashkent, South Kazakhstan Prov.			F		1
BeeCAsia0010483	BeeCAsia 32	28/5/2017	ELKU	BeeCAsia	Halictus (Argalictus) senilis	Animalia	Arthropoda	Insecta	Hymenoptera	Halictidae	Halictinae	Halictus	senilis		(Eversmann, 1852)	R. Murao	2012	O. Tadauchi	30/04/2004	KZ	South Kazakhstan Prov.	KZ56	Lake Charbarinskoe, Chordara, alt. 180 m, West of Tashkent, South Kazakhstan Prov.			F		1
BeeCAsia0009956	BeeCAsia 39	28/5/2017	ELKU	BeeCAsia	Halictus (Hexataenites) resurgens	Animalia	Arthropoda	Insecta	Hymenoptera	Halictidae	Halictinae	Halictus	resurgens		Nurse, 1903	R. Murao	2012	O. Tadauchi	30/04/2004	KZ	South Kazakhstan Prov.	KZ56	Lake Charbarinskoe, Chordara, alt. 180 m, West of Tashkent, South Kazakhstan Prov.			F		1
BeeCAsia0009978	BeeCAsia 39	28/5/2017	ELKU	BeeCAsia	Halictus (Hexataenites) resurgens	Animalia	Arthropoda	Insecta	Hymenoptera	Halictidae	Halictinae	Halictus	resurgens		Nurse, 1903	R. Murao	2012	O. Tadauchi	30/04/2004	KZ	South Kazakhstan Prov.	KZ56	Lake Charbarinskoe, Chordara, alt. 180 m, West of Tashkent, South Kazakhstan Prov.			F		1
BeeCAsia0010012	BeeCAsia 32	28/5/2017	ELKU	BeeCAsia	Halictus (Protohalictus) bucharicus	Animalia	Arthropoda	Insecta	Hymenoptera	Halictidae	Halictinae	Halictus	bucharicus		Blüthgen, 1936	R. Murao	2012	O. Tadauchi	06/06/2003	KZ	South Kazakhstan Prov.	KZ35	Achisai, alt. 500-700 m, Mts. Karatau, South Kazakhstan Prov.			F		1
BeeCAsia0010013	BeeCAsia 32	28/5/2017	ELKU	BeeCAsia	Halictus (Protohalictus) bucharicus	Animalia	Arthropoda	Insecta	Hymenoptera	Halictidae	Halictinae	Halictus	bucharicus		Blüthgen, 1936	R. Murao	2012	O. Tadauchi	06/06/2003	KZ	South Kazakhstan Prov.	KZ35	Achisai, alt. 500-700 m, Mts. Karatau, South Kazakhstan Prov.			F		1
BeeCAsia0011435	BeeCAsia 20	28/5/2017	ELKU	BeeCAsia	Halictus (Seladonia) pjalmensis pjalmensis	Animalia	Arthropoda	Insecta	Hymenoptera	Halictidae	Halictinae	Halictus	pjalmensis	pjalmensis	Strand, 1909	R. Murao	2012	O. Tadauchi	06/06/2003	KZ	South Kazakhstan Prov.	KZ35	Achisai, alt. 500-700 m, Mts. Karatau, South Kazakhstan Prov.			F		1
BeeCAsia0009677	BeeCAsia 31	28/5/2017	ELKU	BeeCAsia	Halictus (Halictus) brunnescens	Animalia	Arthropoda	Insecta	Hymenoptera	Halictidae	Halictinae	Halictus	brunnescens		(Eversmann, 1852)	R. Murao	2012	O. Tadauchi	06/06/2003	KZ	South Kazakhstan Prov.	KZ35	Achisai, alt. 500-700 m, Mts. Karatau, South Kazakhstan Prov.			F	host: Caprifoliaceae gen. et. sp.	1
BeeCAsia0011436	BeeCAsia 20	28/5/2017	ELKU	BeeCAsia	Halictus (Seladonia) pjalmensis pjalmensis	Animalia	Arthropoda	Insecta	Hymenoptera	Halictidae	Halictinae	Halictus	pjalmensis	pjalmensis	Strand, 1909	R. Murao	2012	O. Tadauchi	06/06/2003	KZ	South Kazakhstan Prov.	KZ35	Achisai, alt. 500-700 m, Mts. Karatau, South Kazakhstan Prov.			F		1
BeeCAsia0011437	BeeCAsia 20	28/5/2017	ELKU	BeeCAsia	Halictus (Seladonia) pjalmensis pjalmensis	Animalia	Arthropoda	Insecta	Hymenoptera	Halictidae	Halictinae	Halictus	pjalmensis	pjalmensis	Strand, 1909	R. Murao	2012	O. Tadauchi	06/06/2003	KZ	South Kazakhstan Prov.	KZ35	Achisai, alt. 500-700 m, Mts. Karatau, South Kazakhstan Prov.			F		1
BeeCAsia0011442	BeeCAsia 20	28/5/2017	ELKU	BeeCAsia	Halictus (Seladonia) pjalmensis pjalmensis	Animalia	Arthropoda	Insecta	Hymenoptera	Halictidae	Halictinae	Halictus	pjalmensis	pjalmensis	Strand, 1909	R. Murao	2012	O. Tadauchi	06/06/2003	KZ	South Kazakhstan Prov.	KZ35	Achisai, alt. 500-700 m, Mts. Karatau, South Kazakhstan Prov.			F		1
BeeCAsia0011443	BeeCAsia 20	28/5/2017	ELKU	BeeCAsia	Halictus (Seladonia) pjalmensis pjalmensis	Animalia	Arthropoda	Insecta	Hymenoptera	Halictidae	Halictinae	Halictus	pjalmensis	pjalmensis	Strand, 1909	R. Murao	2012	O. Tadauchi	06/06/2003	KZ	South Kazakhstan Prov.	KZ35	Achisai, alt. 500-700 m, Mts. Karatau, South Kazakhstan Prov.			F		1
BeeCAsia0011444	BeeCAsia 20	28/5/2017	ELKU	BeeCAsia	Halictus (Seladonia) pjalmensis pjalmensis	Animalia	Arthropoda	Insecta	Hymenoptera	Halictidae	Halictinae	Halictus	pjalmensis	pjalmensis	Strand, 1909	R. Murao	2012	O. Tadauchi	06/06/2003	KZ	South Kazakhstan Prov.	KZ35	Achisai, alt. 500-700 m, Mts. Karatau, South Kazakhstan Prov.			F		1
BeeCAsia0011445	BeeCAsia 20	28/5/2017	ELKU	BeeCAsia	Halictus (Seladonia) pjalmensis pjalmensis	Animalia	Arthropoda	Insecta	Hymenoptera	Halictidae	Halictinae	Halictus	pjalmensis	pjalmensis	Strand, 1909	R. Murao	2012	O. Tadauchi	06/06/2003	KZ	South Kazakhstan Prov.	KZ35	Achisai, alt. 500-700 m, Mts. Karatau, South Kazakhstan Prov.			F		1
BeeCAsia0010472	BeeCAsia 32	28/5/2017	ELKU	BeeCAsia	Halictus (Tytthalictus) palustris	Animalia	Arthropoda	Insecta	Hymenoptera	Halictidae	Halictinae	Halictus	palustris		Morawitz, 1876	R. Murao	2012	O. Tadauchi	17/06/2003	KZ	South Kazakhstan Prov.	KZ51	Karaalma alt. 1210 m, Near Jabagly, South Kazakhstan Prov.			F		1
BeeCAsia0009655	BeeCAsia 31	28/5/2017	ELKU	BeeCAsia	Halictus (Halictus) brunnescens	Animalia	Arthropoda	Insecta	Hymenoptera	Halictidae	Halictinae	Halictus	brunnescens		(Eversmann, 1852)	R. Murao	2012	O. Tadauchi	17/06/2003	KZ	South Kazakhstan Prov.	KZ51	Karaalma alt. 1210 m, Near Jabagly, South Kazakhstan Prov.			F		1
BeeCAsia0009656	BeeCAsia 31	28/5/2017	ELKU	BeeCAsia	Halictus (Halictus) brunnescens	Animalia	Arthropoda	Insecta	Hymenoptera	Halictidae	Halictinae	Halictus	brunnescens		(Eversmann, 1852)	R. Murao	2012	O. Tadauchi	17/06/2003	KZ	South Kazakhstan Prov.	KZ51	Karaalma alt. 1210 m, Near Jabagly, South Kazakhstan Prov.			F		1
BeeCAsia0010096	BeeCAsia 32	28/5/2017	ELKU	BeeCAsia	Halictus (Monilapis) compressus transvolgensis	Animalia	Arthropoda	Insecta	Hymenoptera	Halictidae	Halictinae	Halictus	compressus	transvolgensis	Pesenko, 1985	R. Murao	2012	O. Tadauchi	17/06/2003	KZ	South Kazakhstan Prov.	KZ51	Karaalma alt. 1210 m, Near Jabagly, South Kazakhstan Prov.			F		1
BeeCAsia0010101	BeeCAsia 32	28/5/2017	ELKU	BeeCAsia	Halictus (Monilapis) compressus transvolgensis	Animalia	Arthropoda	Insecta	Hymenoptera	Halictidae	Halictinae	Halictus	compressus	transvolgensis	Pesenko, 1985	R. Murao	2012	O. Tadauchi	17/06/2003	KZ	South Kazakhstan Prov.	KZ51	Karaalma alt. 1210 m, Near Jabagly, South Kazakhstan Prov.			F		1
BeeCAsia0011509	BeeCAsia 21	28/5/2017	ELKU	BeeCAsia	Halictus (Seladonia) seladonius	Animalia	Arthropoda	Insecta	Hymenoptera	Halictidae	Halictinae	Halictus	seladonius		(Fabricius, 1794)	R. Murao	2012	O. Tadauchi	11/05/2004	KZ	South Kazakhstan Prov.	KZ37	Aksu Jabagly, alt. 1080-1830 m, South Kazakhstan Prov.			F		1
BeeCAsia0011432	BeeCAsia 20	28/5/2017	ELKU	BeeCAsia	Halictus (Seladonia) pjalmensis pjalmensis	Animalia	Arthropoda	Insecta	Hymenoptera	Halictidae	Halictinae	Halictus	pjalmensis	pjalmensis	Strand, 1909	R. Murao	2012	O. Tadauchi	09/06/2003	KZ	South Kazakhstan Prov.	KZ39	Baijansai, alt. 660-1030 m, Mts. Karatau, South Kazakhstan Prov.			F		1
BeeCAsia0010430	BeeCAsia 39	28/5/2017	ELKU	BeeCAsia	Halictus (Platyhalictus) minor	Animalia	Arthropoda	Insecta	Hymenoptera	Halictidae	Halictinae	Halictus	minor		Morawitz, 1876	R. Murao	2012	O. Tadauchi	16/06/2003	KZ	South Kazakhstan Prov.	KZ38	Aksu Valley, Jabagly, alt. 130-560 m, South Kazakhstan Prov.			F		1
BeeCAsia0010015	BeeCAsia 32	28/5/2017	ELKU	BeeCAsia	Halictus (Protohalictus) bucharicus	Animalia	Arthropoda	Insecta	Hymenoptera	Halictidae	Halictinae	Halictus	bucharicus		Blüthgen, 1936	R. Murao	2012	O. Tadauchi	16/06/2003	KZ	South Kazakhstan Prov.	KZ38	Aksu Valley, Jabagly, alt. 130-560 m, South Kazakhstan Prov.			F		1
BeeCAsia0024738	BeeCAsia 20	28/5/2017	ELKU	BeeCAsia	Halictus (Seladonia) seladonius	Animalia	Arthropoda	Insecta	Hymenoptera	Halictidae	Halictinae	Halictus	seladonius		(Fabricius, 1794)	R. Murao	2012	A. Dawut	27/05/2000	KG	Bishkek	KG1	Bishkek City			F	host: Trifolium repens	1
BeeCAsia0010059	BeeCAsia 39	28/5/2017	ELKU	BeeCAsia	Halictus (Platyhalictus) minor	Animalia	Arthropoda	Insecta	Hymenoptera	Halictidae	Halictinae	Halictus	minor		Morawitz, 1876	R. Murao	2012	R. Murao	12/05/2004	KZ	Jambyl Prov.	KZ20	Berkaza Valley, 60km, SW of Karatau City, Jambyl Prov.			F		1
BeeCAsia0010060	BeeCAsia 39	28/5/2017	ELKU	BeeCAsia	Halictus (Platyhalictus) minor	Animalia	Arthropoda	Insecta	Hymenoptera	Halictidae	Halictinae	Halictus	minor		Morawitz, 1876	R. Murao	2012	R. Murao	12/05/2004	KZ	Jambyl Prov.	KZ20	Berkaza Valley, 60km, SW of Karatau City, Jambyl Prov.			F		1
BeeCAsia0009664	BeeCAsia 31	28/5/2017	ELKU	BeeCAsia	Halictus (Halictus) brunnescens	Animalia	Arthropoda	Insecta	Hymenoptera	Halictidae	Halictinae	Halictus	brunnescens		(Eversmann, 1852)	R. Murao	2012	R. Murao	12/05/2004	KZ	Jambyl Prov.	KZ20	Berkaza Valley, 60km, SW of Karatau City, Jambyl Prov.			F		1
BeeCAsia0009984	BeeCAsia 39	28/5/2017	ELKU	BeeCAsia	Halictus (Hexataenites) resurgens	Animalia	Arthropoda	Insecta	Hymenoptera	Halictidae	Halictinae	Halictus	resurgens		Nurse, 1903	R. Murao	2012	R. Murao	10/05/2004	KZ	South Kazakhstan Prov.	KZ58	North of Boroldy village, Mts. Karatau, South Kazakhstan Prov.			F		1
BeeCAsia0009948	BeeCAsia 39	28/5/2017	ELKU	BeeCAsia	Halictus (Hexataenites) resurgens	Animalia	Arthropoda	Insecta	Hymenoptera	Halictidae	Halictinae	Halictus	resurgens		Nurse, 1903	R. Murao	2012	R. Murao	14/05/2004	KZ	Jambyl Prov.	KZ31	NW of Akkol, Muyunkum desert, Jambyl Prov.			F		1
BeeCAsia0009952	BeeCAsia 39	28/5/2017	ELKU	BeeCAsia	Halictus (Hexataenites) resurgens	Animalia	Arthropoda	Insecta	Hymenoptera	Halictidae	Halictinae	Halictus	resurgens		Nurse, 1903	R. Murao	2012	R. Murao	13/05/2004	KZ	Jambyl Prov.	KZ24	Karatau-Janatas, alt. 680 m, Jambyl Prov.			F		1
BeeCAsia0010007	BeeCAsia 32	28/5/2017	ELKU	BeeCAsia	Halictus (Argalictus) senilis	Animalia	Arthropoda	Insecta	Hymenoptera	Halictidae	Halictinae	Halictus	senilis		(Eversmann, 1852)	R. Murao	2012	R. Murao	13/05/2004	KZ	Jambyl Prov.	KZ30	North of Janatas, alt. 420 m, Jambyl Prov.			F		1
BeeCAsia0009670	BeeCAsia 31	28/5/2017	ELKU	BeeCAsia	Halictus (Halictus) brunnescens	Animalia	Arthropoda	Insecta	Hymenoptera	Halictidae	Halictinae	Halictus	brunnescens		(Eversmann, 1852)	R. Murao	2012	K. Mitai	08/06/2003	KZ	South Kazakhstan Prov.	KZ63	Shayan-Birlik, South Kazakhstan Prov.			F	host: Cruciferae sp.	1
BeeCAsia0011460	BeeCAsia 20	28/5/2017	ELKU	BeeCAsia	Halictus (Seladonia) pjalmensis pjalmensis	Animalia	Arthropoda	Insecta	Hymenoptera	Halictidae	Halictinae	Halictus	pjalmensis	pjalmensis	Strand, 1909	R. Murao	2012	K. Mitai	06/06/2003	KZ	South Kazakhstan Prov.	KZ35	Achisai, alt. 500-700 m, Mts. Karatau, South Kazakhstan Prov.			F		1
BeeCAsia0010419	BeeCAsia 39	28/5/2017	ELKU	BeeCAsia	Halictus (Platyhalictus) minor	Animalia	Arthropoda	Insecta	Hymenoptera	Halictidae	Halictinae	Halictus	minor		Morawitz, 1876	R. Murao	2012	K. Mitai	04/06/2003	KZ	South Kazakhstan Prov.	KZ35	Achisai, alt. 500-700 m, Mts. Karatau, South Kazakhstan Prov.			F		1
BeeCAsia0010434	BeeCAsia 39	28/5/2017	ELKU	BeeCAsia	Halictus (Hexataenites) resurgens	Animalia	Arthropoda	Insecta	Hymenoptera	Halictidae	Halictinae	Halictus	resurgens		Nurse, 1903	R. Murao	2012	K. Mitai	04/06/2003	KZ	South Kazakhstan Prov.	KZ35	Achisai, alt. 500-700 m, Mts. Karatau, South Kazakhstan Prov.			F		1
BeeCAsia0010342	BeeCAsia 32	28/5/2017	ELKU	BeeCAsia	Halictus (Protohalictus) bucharicus	Animalia	Arthropoda	Insecta	Hymenoptera	Halictidae	Halictinae	Halictus	bucharicus		Blüthgen, 1936	R. Murao	2012	K. Mitai	05/06/2003	KZ	South Kazakhstan Prov.	KZ35	Achisai, alt. 500-700 m, Mts. Karatau, South Kazakhstan Prov.			F	host: Ferula tenuisecta	1
BeeCAsia0010343	BeeCAsia 32	28/5/2017	ELKU	BeeCAsia	Halictus (Protohalictus) bucharicus	Animalia	Arthropoda	Insecta	Hymenoptera	Halictidae	Halictinae	Halictus	bucharicus		Blüthgen, 1936	R. Murao	2012	K. Mitai	05/06/2003	KZ	South Kazakhstan Prov.	KZ35	Achisai, alt. 500-700 m, Mts. Karatau, South Kazakhstan Prov.			F	host: Ferula tenuisecta	1
BeeCAsia0010344	BeeCAsia 32	28/5/2017	ELKU	BeeCAsia	Halictus (Protohalictus) bucharicus	Animalia	Arthropoda	Insecta	Hymenoptera	Halictidae	Halictinae	Halictus	bucharicus		Blüthgen, 1936	R. Murao	2012	K. Mitai	05/06/2003	KZ	South Kazakhstan Prov.	KZ35	Achisai, alt. 500-700 m, Mts. Karatau, South Kazakhstan Prov.			F	host: Ferula tenuisecta	1
BeeCAsia0009636	BeeCAsia 31	28/5/2017	ELKU	BeeCAsia	Halictus (Halictus) brunnescens	Animalia	Arthropoda	Insecta	Hymenoptera	Halictidae	Halictinae	Halictus	brunnescens		(Eversmann, 1852)	R. Murao	2012	K. Mitai	05/06/2003	KZ	South Kazakhstan Prov.	KZ35	Achisai, alt. 500-700 m, Mts. Karatau, South Kazakhstan Prov.			F	host: Ferula tenuisecta	1
BeeCAsia0009637	BeeCAsia 31	28/5/2017	ELKU	BeeCAsia	Halictus (Halictus) brunnescens	Animalia	Arthropoda	Insecta	Hymenoptera	Halictidae	Halictinae	Halictus	brunnescens		(Eversmann, 1852)	R. Murao	2012	K. Mitai	05/06/2003	KZ	South Kazakhstan Prov.	KZ35	Achisai, alt. 500-700 m, Mts. Karatau, South Kazakhstan Prov.			F	host: Ferula tenuisecta	1
BeeCAsia0009638	BeeCAsia 31	28/5/2017	ELKU	BeeCAsia	Halictus (Halictus) brunnescens	Animalia	Arthropoda	Insecta	Hymenoptera	Halictidae	Halictinae	Halictus	brunnescens		(Eversmann, 1852)	R. Murao	2012	K. Mitai	05/06/2003	KZ	South Kazakhstan Prov.	KZ35	Achisai, alt. 500-700 m, Mts. Karatau, South Kazakhstan Prov.			F	host: Ferula tenuisecta	1
BeeCAsia0011795	BeeCAsia 20	28/5/2017	ELKU	BeeCAsia	Halictus (Seladonia) seladonius	Animalia	Arthropoda	Insecta	Hymenoptera	Halictidae	Halictinae	Halictus	seladonius		(Fabricius, 1794)	R. Murao	2012	K. Mitai	02/06/2003	KZ	South Kazakhstan Prov.	KZ50	Kantagi, alt. 550-700 m, near Kentau, Mts. Karatau, South Kazakhstan Prov.			F		1
BeeCAsia0009639	BeeCAsia 31	28/5/2017	ELKU	BeeCAsia	Halictus (Halictus) brunnescens	Animalia	Arthropoda	Insecta	Hymenoptera	Halictidae	Halictinae	Halictus	brunnescens		(Eversmann, 1852)	R. Murao	2012	K. Mitai	02/06/2003	KZ	South Kazakhstan Prov.	KZ50	Kantagi, alt. 550-700 m, near Kentau, Mts. Karatau, South Kazakhstan Prov.			F		1
BeeCAsia0009640	BeeCAsia 31	28/5/2017	ELKU	BeeCAsia	Halictus (Halictus) brunnescens	Animalia	Arthropoda	Insecta	Hymenoptera	Halictidae	Halictinae	Halictus	brunnescens		(Eversmann, 1852)	R. Murao	2012	K. Mitai	02/06/2003	KZ	South Kazakhstan Prov.	KZ50	Kantagi, alt. 550-700 m, near Kentau, Mts. Karatau, South Kazakhstan Prov.			F		1
BeeCAsia0010353	BeeCAsia 32	28/5/2017	ELKU	BeeCAsia	Halictus (Protohalictus) bucharicus	Animalia	Arthropoda	Insecta	Hymenoptera	Halictidae	Halictinae	Halictus	bucharicus		Blüthgen, 1936	R. Murao	2012	K. Mitai	01/06/2003	KZ	South Kazakhstan Prov.	KZ50	Kantagi, alt. 550-700 m, near Kentau, Mts. Karatau, South Kazakhstan Prov.			F		1
BeeCAsia0010354	BeeCAsia 32	28/5/2017	ELKU	BeeCAsia	Halictus (Protohalictus) bucharicus	Animalia	Arthropoda	Insecta	Hymenoptera	Halictidae	Halictinae	Halictus	bucharicus		Blüthgen, 1936	R. Murao	2012	K. Mitai	01/06/2003	KZ	South Kazakhstan Prov.	KZ50	Kantagi, alt. 550-700 m, near Kentau, Mts. Karatau, South Kazakhstan Prov.			F		1
BeeCAsia0010355	BeeCAsia 32	28/5/2017	ELKU	BeeCAsia	Halictus (Protohalictus) bucharicus	Animalia	Arthropoda	Insecta	Hymenoptera	Halictidae	Halictinae	Halictus	bucharicus		Blüthgen, 1936	R. Murao	2012	K. Mitai	01/06/2003	KZ	South Kazakhstan Prov.	KZ50	Kantagi, alt. 550-700 m, near Kentau, Mts. Karatau, South Kazakhstan Prov.			F	host: Ferula tenuisecta	1
BeeCAsia0010421	BeeCAsia 39	28/5/2017	ELKU	BeeCAsia	Halictus (Platyhalictus) minor	Animalia	Arthropoda	Insecta	Hymenoptera	Halictidae	Halictinae	Halictus	minor		Morawitz, 1876	R. Murao	2012	K. Mitai	01/06/2003	KZ	South Kazakhstan Prov.	KZ50	Kantagi, alt. 550-700 m, near Kentau, Mts. Karatau, South Kazakhstan Prov.			F		1
BeeCAsia0010356	BeeCAsia 32	28/5/2017	ELKU	BeeCAsia	Halictus (Protohalictus) bucharicus	Animalia	Arthropoda	Insecta	Hymenoptera	Halictidae	Halictinae	Halictus	bucharicus		Blüthgen, 1936	R. Murao	2012	K. Mitai	01/06/2003	KZ	South Kazakhstan Prov.	KZ50	Kantagi, alt. 550-700 m, near Kentau, Mts. Karatau, South Kazakhstan Prov.			F	host: Ferula tenuisecta	1
BeeCAsia0010379	BeeCAsia 32	28/5/2017	ELKU	BeeCAsia	Halictus (Monilapis) compressus transvolgensis	Animalia	Arthropoda	Insecta	Hymenoptera	Halictidae	Halictinae	Halictus	compressus	transvolgensis	Pesenko, 1985	R. Murao	2012	K. Mitai	30/05/2003	KZ	South Kazakhstan Prov.	KZ59	North of Chimkent, alt. 400 m, South Kazakhstan Prov.			F	host: Achillea biebersteinii	1
BeeCAsia0009645	BeeCAsia 31	28/5/2017	ELKU	BeeCAsia	Halictus (Halictus) brunnescens	Animalia	Arthropoda	Insecta	Hymenoptera	Halictidae	Halictinae	Halictus	brunnescens		(Eversmann, 1852)	R. Murao	2012	K. Mitai	30/05/2003	KZ	South Kazakhstan Prov.	KZ59	North of Chimkent, alt. 400 m, South Kazakhstan Prov.			F	host: Achillea biebersteinii	1
BeeCAsia0009646	BeeCAsia 31	28/5/2017	ELKU	BeeCAsia	Halictus (Halictus) brunnescens	Animalia	Arthropoda	Insecta	Hymenoptera	Halictidae	Halictinae	Halictus	brunnescens		(Eversmann, 1852)	R. Murao	2012	K. Mitai	30/05/2003	KZ	South Kazakhstan Prov.	KZ59	North of Chimkent, alt. 400 m, South Kazakhstan Prov.			F	host: Achillea biebersteinii	1
BeeCAsia0009647	BeeCAsia 31	28/5/2017	ELKU	BeeCAsia	Halictus (Halictus) brunnescens	Animalia	Arthropoda	Insecta	Hymenoptera	Halictidae	Halictinae	Halictus	brunnescens		(Eversmann, 1852)	R. Murao	2012	K. Mitai	30/05/2003	KZ	South Kazakhstan Prov.	KZ59	North of Chimkent, alt. 400 m, South Kazakhstan Prov.			F	host: Achillea biebersteinii	1
BeeCAsia0009625	BeeCAsia 31	28/5/2017	ELKU	BeeCAsia	Halictus (Halictus) brunnescens	Animalia	Arthropoda	Insecta	Hymenoptera	Halictidae	Halictinae	Halictus	brunnescens		(Eversmann, 1852)	R. Murao	2012	K. Mitai	28/05/2003	KZ	South Kazakhstan Prov.	KZ37	Aksu Jabagly, alt. 1080-1830 m, South Kazakhstan Prov.			F	host: Salix sp.	1
BeeCAsia0010376	BeeCAsia 32	28/5/2017	ELKU	BeeCAsia	Halictus (Monilapis) compressus transvolgensis	Animalia	Arthropoda	Insecta	Hymenoptera	Halictidae	Halictinae	Halictus	compressus	transvolgensis	Pesenko, 1985	R. Murao	2012	K. Mitai	28/05/2003	KZ	South Kazakhstan Prov.	KZ37	Aksu Jabagly, alt. 1080-1830 m, South Kazakhstan Prov.			F		1
BeeCAsia0010448	BeeCAsia 39	28/5/2017	ELKU	BeeCAsia	Halictus (Hexataenites) resurgens	Animalia	Arthropoda	Insecta	Hymenoptera	Halictidae	Halictinae	Halictus	resurgens		Nurse, 1903	R. Murao	2012	K. Mitai	28/05/2003	KZ	South Kazakhstan Prov.	KZ37	Aksu Jabagly, alt. 1080-1830 m, South Kazakhstan Prov.			F	host: Trifolium repens	1
BeeCAsia0010449	BeeCAsia 39	28/5/2017	ELKU	BeeCAsia	Halictus (Hexataenites) resurgens	Animalia	Arthropoda	Insecta	Hymenoptera	Halictidae	Halictinae	Halictus	resurgens		Nurse, 1903	R. Murao	2012	K. Mitai	28/05/2003	KZ	South Kazakhstan Prov.	KZ37	Aksu Jabagly, alt. 1080-1830 m, South Kazakhstan Prov.			F	host: Trifolium repens	1
BeeCAsia0010391	BeeCAsia 32	28/5/2017	ELKU	BeeCAsia	Halictus (Monilapis) compressus transvolgensis	Animalia	Arthropoda	Insecta	Hymenoptera	Halictidae	Halictinae	Halictus	compressus	transvolgensis	Pesenko, 1985	R. Murao	2012	K. Mitai	28/05/2003	KZ	South Kazakhstan Prov.	KZ37	Aksu Jabagly, alt. 1080-1830 m, South Kazakhstan Prov.			F		1
BeeCAsia0010392	BeeCAsia 32	28/5/2017	ELKU	BeeCAsia	Halictus (Monilapis) compressus transvolgensis	Animalia	Arthropoda	Insecta	Hymenoptera	Halictidae	Halictinae	Halictus	compressus	transvolgensis	Pesenko, 1985	R. Murao	2012	K. Mitai	28/05/2003	KZ	South Kazakhstan Prov.	KZ37	Aksu Jabagly, alt. 1080-1830 m, South Kazakhstan Prov.			F		1
BeeCAsia0010393	BeeCAsia 32	28/5/2017	ELKU	BeeCAsia	Halictus (Monilapis) compressus transvolgensis	Animalia	Arthropoda	Insecta	Hymenoptera	Halictidae	Halictinae	Halictus	compressus	transvolgensis	Pesenko, 1985	R. Murao	2012	K. Mitai	28/05/2003	KZ	South Kazakhstan Prov.	KZ37	Aksu Jabagly, alt. 1080-1830 m, South Kazakhstan Prov.			F		1
BeeCAsia0010450	BeeCAsia 39	28/5/2017	ELKU	BeeCAsia	Halictus (Hexataenites) resurgens	Animalia	Arthropoda	Insecta	Hymenoptera	Halictidae	Halictinae	Halictus	resurgens		Nurse, 1903	R. Murao	2012	K. Mitai	28/05/2003	KZ	South Kazakhstan Prov.	KZ37	Aksu Jabagly, alt. 1080-1830 m, South Kazakhstan Prov.			F	host: Trifolium repens	1
BeeCAsia0010451	BeeCAsia 39	28/5/2017	ELKU	BeeCAsia	Halictus (Hexataenites) resurgens	Animalia	Arthropoda	Insecta	Hymenoptera	Halictidae	Halictinae	Halictus	resurgens		Nurse, 1903	R. Murao	2012	K. Mitai	28/05/2003	KZ	South Kazakhstan Prov.	KZ37	Aksu Jabagly, alt. 1080-1830 m, South Kazakhstan Prov.			F	host: Trifolium repens	1
BeeCAsia0009651	BeeCAsia 31	28/5/2017	ELKU	BeeCAsia	Halictus (Halictus) brunnescens	Animalia	Arthropoda	Insecta	Hymenoptera	Halictidae	Halictinae	Halictus	brunnescens		(Eversmann, 1852)	R. Murao	2012	K. Mitai	28/05/2003	KZ	South Kazakhstan Prov.	KZ37	Aksu Jabagly, alt. 1080-1830 m, South Kazakhstan Prov.			F	host: Trifolium repens	1
BeeCAsia0010456	BeeCAsia 39	28/5/2017	ELKU	BeeCAsia	Halictus (Hexataenites) resurgens	Animalia	Arthropoda	Insecta	Hymenoptera	Halictidae	Halictinae	Halictus	resurgens		Nurse, 1903	R. Murao	2012	K. Mitai	28/05/2003	KZ	South Kazakhstan Prov.	KZ37	Aksu Jabagly, alt. 1080-1830 m, South Kazakhstan Prov.			F	host: Trifolium repens	1
BeeCAsia0010389	BeeCAsia 32	28/5/2017	ELKU	BeeCAsia	Halictus (Monilapis) compressus transvolgensis	Animalia	Arthropoda	Insecta	Hymenoptera	Halictidae	Halictinae	Halictus	compressus	transvolgensis	Pesenko, 1985	R. Murao	2012	K. Mitai	27/05/2003	KZ	South Kazakhstan Prov.	KZ37	Aksu Jabagly, alt. 1080-1830 m, South Kazakhstan Prov.			F	host: Taraxacum sp.	1
BeeCAsia0010394	BeeCAsia 32	28/5/2017	ELKU	BeeCAsia	Halictus (Monilapis) compressus transvolgensis	Animalia	Arthropoda	Insecta	Hymenoptera	Halictidae	Halictinae	Halictus	compressus	transvolgensis	Pesenko, 1985	R. Murao	2012	K. Mitai	27/05/2003	KZ	South Kazakhstan Prov.	KZ37	Aksu Jabagly, alt. 1080-1830 m, South Kazakhstan Prov.			F	host: Trifolium repens	1
BeeCAsia0010395	BeeCAsia 32	28/5/2017	ELKU	BeeCAsia	Halictus (Monilapis) compressus transvolgensis	Animalia	Arthropoda	Insecta	Hymenoptera	Halictidae	Halictinae	Halictus	compressus	transvolgensis	Pesenko, 1985	R. Murao	2012	K. Mitai	27/05/2003	KZ	South Kazakhstan Prov.	KZ37	Aksu Jabagly, alt. 1080-1830 m, South Kazakhstan Prov.			F	host: Trollius altaicus	1
BeeCAsia0009624	BeeCAsia 31	28/5/2017	ELKU	BeeCAsia	Halictus (Halictus) brunnescens	Animalia	Arthropoda	Insecta	Hymenoptera	Halictidae	Halictinae	Halictus	brunnescens		(Eversmann, 1852)	R. Murao	2012	K. Mitai	27/05/2003	KZ	South Kazakhstan Prov.	KZ37	Aksu Jabagly, alt. 1080-1830 m, South Kazakhstan Prov.			F	host: Trifolium repens	1
BeeCAsia0010396	BeeCAsia 32	28/5/2017	ELKU	BeeCAsia	Halictus (Monilapis) compressus transvolgensis	Animalia	Arthropoda	Insecta	Hymenoptera	Halictidae	Halictinae	Halictus	compressus	transvolgensis	Pesenko, 1985	R. Murao	2012	K. Mitai	27/05/2003	KZ	South Kazakhstan Prov.	KZ37	Aksu Jabagly, alt. 1080-1830 m, South Kazakhstan Prov.			F	host: Trollius altaicus	1
BeeCAsia0010245	BeeCAsia 32	28/5/2017	ELKU	BeeCAsia	Halictus (Halictus) duplocinctus	Animalia	Arthropoda	Insecta	Hymenoptera	Halictidae	Halictinae	Halictus	duplocinctus		Vachal, 1902	R. Murao	2012	O. Tadauchi	19/05/2004	KZ	Almaty Prov.	KZ16	Riverside, Ili river, Northwest of Kapchagay, Almaty Prov.			F		1
BeeCAsia0009989	BeeCAsia 39	28/5/2017	ELKU	BeeCAsia	Halictus (Hexataenites) resurgens	Animalia	Arthropoda	Insecta	Hymenoptera	Halictidae	Halictinae	Halictus	resurgens		Nurse, 1903	R. Murao	2012	O. Tadauchi	01/05/2004	KZ	South Kazakhstan Prov.	KZ68	West of Kamsomolskoe, Kyzylkum desert, South Kazakhstan Prov.			F		1
BeeCAsia0010880	BeeCAsia 20	28/5/2017	ELKU	BeeCAsia	Halictus (Seladonia) pjalmensis pjalmensis	Animalia	Arthropoda	Insecta	Hymenoptera	Halictidae	Halictinae	Halictus	pjalmensis	pjalmensis	Strand, 1909	R. Murao	2012	O. Tadauchi	01/05/2004	KZ	South Kazakhstan Prov.	KZ68	West of Kamsomolskoe, Kyzylkum desert, South Kazakhstan Prov.			F		1
BeeCAsia0009990	BeeCAsia 39	28/5/2017	ELKU	BeeCAsia	Halictus (Hexataenites) resurgens	Animalia	Arthropoda	Insecta	Hymenoptera	Halictidae	Halictinae	Halictus	resurgens		Nurse, 1903	R. Murao	2012	O. Tadauchi	01/05/2004	KZ	South Kazakhstan Prov.	KZ68	West of Kamsomolskoe, Kyzylkum desert, South Kazakhstan Prov.			F		1
BeeCAsia0009991	BeeCAsia 39	28/5/2017	ELKU	BeeCAsia	Halictus (Hexataenites) resurgens	Animalia	Arthropoda	Insecta	Hymenoptera	Halictidae	Halictinae	Halictus	resurgens		Nurse, 1903	R. Murao	2012	O. Tadauchi	01/05/2004	KZ	South Kazakhstan Prov.	KZ68	West of Kamsomolskoe, Kyzylkum desert, South Kazakhstan Prov.			F		1
BeeCAsia0009998	BeeCAsia 32	28/5/2017	ELKU	BeeCAsia	Halictus (Argalictus) senilis	Animalia	Arthropoda	Insecta	Hymenoptera	Halictidae	Halictinae	Halictus	senilis		(Eversmann, 1852)	R. Murao	2012	O. Tadauchi	01/05/2004	KZ	South Kazakhstan Prov.	KZ68	West of Kamsomolskoe, Kyzylkum desert, South Kazakhstan Prov.			F		1
BeeCAsia0009999	BeeCAsia 32	28/5/2017	ELKU	BeeCAsia	Halictus (Argalictus) senilis	Animalia	Arthropoda	Insecta	Hymenoptera	Halictidae	Halictinae	Halictus	senilis		(Eversmann, 1852)	R. Murao	2012	O. Tadauchi	01/05/2004	KZ	South Kazakhstan Prov.	KZ68	West of Kamsomolskoe, Kyzylkum desert, South Kazakhstan Prov.			F		1
BeeCAsia0010235	BeeCAsia 32	28/5/2017	ELKU	BeeCAsia	Halictus (Halictus) duplocinctus	Animalia	Arthropoda	Insecta	Hymenoptera	Halictidae	Halictinae	Halictus	duplocinctus		Vachal, 1902	R. Murao	2012	O. Tadauchi	01/05/2004	KZ	South Kazakhstan Prov.	KZ68	West of Kamsomolskoe, Kyzylkum desert, South Kazakhstan Prov.			F		1
BeeCAsia0011433	BeeCAsia 20	28/5/2017	ELKU	BeeCAsia	Halictus (Seladonia) pjalmensis pjalmensis	Animalia	Arthropoda	Insecta	Hymenoptera	Halictidae	Halictinae	Halictus	pjalmensis	pjalmensis	Strand, 1909	R. Murao	2012	O. Tadauchi	09/06/2003	KZ	South Kazakhstan Prov.	KZ39	Baijansai, alt. 660-1030 m, Mts. Karatau, South Kazakhstan Prov.			F		1
BeeCAsia0010500	BeeCAsia 32	28/5/2017	ELKU	BeeCAsia	Halictus (Protohalictus) rubicundus	Animalia	Arthropoda	Insecta	Hymenoptera	Halictidae	Halictinae	Halictus	rubicundus		(Christ, 1791)	R. Murao	2012	O. Tadauchi	13/05/2004	KZ	Jambyl Prov.	kZ23	Karatau City, alt. 600 m, Jambyl Prov.			F		1
BeeCAsia0010053	BeeCAsia 39	28/5/2017	ELKU	BeeCAsia	Halictus (Platyhalictus) minor	Animalia	Arthropoda	Insecta	Hymenoptera	Halictidae	Halictinae	Halictus	minor		Morawitz, 1876	R. Murao	2012	O. Tadauchi	13/05/2004	KZ	Jambyl Prov.	kZ23	Karatau City, alt. 600 m, Jambyl Prov.			F		1
BeeCAsia0010054	BeeCAsia 39	28/5/2017	ELKU	BeeCAsia	Halictus (Platyhalictus) minor	Animalia	Arthropoda	Insecta	Hymenoptera	Halictidae	Halictinae	Halictus	minor		Morawitz, 1876	R. Murao	2012	O. Tadauchi	13/05/2004	KZ	Jambyl Prov.	kZ23	Karatau City, alt. 600 m, Jambyl Prov.			F		1
BeeCAsia0010055	BeeCAsia 39	28/5/2017	ELKU	BeeCAsia	Halictus (Platyhalictus) minor	Animalia	Arthropoda	Insecta	Hymenoptera	Halictidae	Halictinae	Halictus	minor		Morawitz, 1876	R. Murao	2012	O. Tadauchi	13/05/2004	KZ	Jambyl Prov.	kZ23	Karatau City, alt. 600 m, Jambyl Prov.			F		1
BeeCAsia0010056	BeeCAsia 39	28/5/2017	ELKU	BeeCAsia	Halictus (Platyhalictus) minor	Animalia	Arthropoda	Insecta	Hymenoptera	Halictidae	Halictinae	Halictus	minor		Morawitz, 1876	R. Murao	2012	O. Tadauchi	13/05/2004	KZ	Jambyl Prov.	kZ23	Karatau City, alt. 600 m, Jambyl Prov.			F		1
BeeCAsia0011420	BeeCAsia 20	28/5/2017	ELKU	BeeCAsia	Halictus (Seladonia) pjalmensis pjalmensis	Animalia	Arthropoda	Insecta	Hymenoptera	Halictidae	Halictinae	Halictus	pjalmensis	pjalmensis	Strand, 1909	R. Murao	2012	O. Tadauchi	13/05/2004	KZ	Jambyl Prov.	kZ23	Karatau City, alt. 600 m, Jambyl Prov.			F		1
BeeCAsia0011182	BeeCAsia 19	28/5/2017	ELKU	BeeCAsia	Halictus (Mucoreohalictus) mucidus	Animalia	Arthropoda	Insecta	Hymenoptera	Halictidae	Halictinae	Halictus	mucidus		Blüthgen, 1923	R. Murao	2012	O. Tadauchi	13/05/2004	KZ	Jambyl Prov.	kZ23	Karatau City, alt. 600 m, Jambyl Prov.			F		1
BeeCAsia0011295	BeeCAsia 19	28/5/2017	ELKU	BeeCAsia	Halictus (Mucoreohalictus) mucoreus	Animalia	Arthropoda	Insecta	Hymenoptera	Halictidae	Halictinae	Halictus	mucoreus		Eversmann, 1852	R. Murao	2012	O. Tadauchi	13/05/2004	KZ	Jambyl Prov.	kZ23	Karatau City, alt. 600 m, Jambyl Prov.			F		1
BeeCAsia0009728	BeeCAsia 31	28/5/2017	ELKU	BeeCAsia	Halictus (Halictus) brunnescens	Animalia	Arthropoda	Insecta	Hymenoptera	Halictidae	Halictinae	Halictus	brunnescens		(Eversmann, 1852)	R. Murao	2012	O. Tadauchi	13/05/2004	KZ	Jambyl Prov.	kZ23	Karatau City, alt. 600 m, Jambyl Prov.			F		1
BeeCAsia0009729	BeeCAsia 31	28/5/2017	ELKU	BeeCAsia	Halictus (Halictus) brunnescens	Animalia	Arthropoda	Insecta	Hymenoptera	Halictidae	Halictinae	Halictus	brunnescens		(Eversmann, 1852)	R. Murao	2012	O. Tadauchi	13/05/2004	KZ	Jambyl Prov.	kZ23	Karatau City, alt. 600 m, Jambyl Prov.			F		1
BeeCAsia0009730	BeeCAsia 31	28/5/2017	ELKU	BeeCAsia	Halictus (Halictus) brunnescens	Animalia	Arthropoda	Insecta	Hymenoptera	Halictidae	Halictinae	Halictus	brunnescens		(Eversmann, 1852)	R. Murao	2012	O. Tadauchi	13/05/2004	KZ	Jambyl Prov.	kZ23	Karatau City, alt. 600 m, Jambyl Prov.			F		1
BeeCAsia0009731	BeeCAsia 31	28/5/2017	ELKU	BeeCAsia	Halictus (Halictus) brunnescens	Animalia	Arthropoda	Insecta	Hymenoptera	Halictidae	Halictinae	Halictus	brunnescens		(Eversmann, 1852)	R. Murao	2012	O. Tadauchi	13/05/2004	KZ	Jambyl Prov.	kZ23	Karatau City, alt. 600 m, Jambyl Prov.			F		1
BeeCAsia0009742	BeeCAsia 31	28/5/2017	ELKU	BeeCAsia	Halictus (Halictus) brunnescens	Animalia	Arthropoda	Insecta	Hymenoptera	Halictidae	Halictinae	Halictus	brunnescens		(Eversmann, 1852)	R. Murao	2012	O. Tadauchi	13/05/2004	KZ	Jambyl Prov.	kZ23	Karatau City, alt. 600 m, Jambyl Prov.			F		1
BeeCAsia0009743	BeeCAsia 31	28/5/2017	ELKU	BeeCAsia	Halictus (Halictus) brunnescens	Animalia	Arthropoda	Insecta	Hymenoptera	Halictidae	Halictinae	Halictus	brunnescens		(Eversmann, 1852)	R. Murao	2012	O. Tadauchi	13/05/2004	KZ	Jambyl Prov.	kZ23	Karatau City, alt. 600 m, Jambyl Prov.			F		1
BeeCAsia0009744	BeeCAsia 31	28/5/2017	ELKU	BeeCAsia	Halictus (Halictus) brunnescens	Animalia	Arthropoda	Insecta	Hymenoptera	Halictidae	Halictinae	Halictus	brunnescens		(Eversmann, 1852)	R. Murao	2012	O. Tadauchi	13/05/2004	KZ	Jambyl Prov.	kZ23	Karatau City, alt. 600 m, Jambyl Prov.			F		1
BeeCAsia0009760	BeeCAsia 31	28/5/2017	ELKU	BeeCAsia	Halictus (Halictus) brunnescens	Animalia	Arthropoda	Insecta	Hymenoptera	Halictidae	Halictinae	Halictus	brunnescens		(Eversmann, 1852)	R. Murao	2012	O. Tadauchi	13/05/2004	KZ	Jambyl Prov.	kZ23	Karatau City, alt. 600 m, Jambyl Prov.			F		1
BeeCAsia0009550	BeeCAsia 31	28/5/2017	ELKU	BeeCAsia	Halictus (Halictus) brunnescens	Animalia	Arthropoda	Insecta	Hymenoptera	Halictidae	Halictinae	Halictus	brunnescens		(Eversmann, 1852)	R. Murao	2012	O. Tadauchi	19/05/2004	KZ	Almaty Prov.	KZ16	Riverside, Ili river, Northwest of Kapchagay, Almaty Prov.			F		1
BeeCAsia0010233	BeeCAsia 32	28/5/2017	ELKU	BeeCAsia	Halictus (Halictus) duplocinctus	Animalia	Arthropoda	Insecta	Hymenoptera	Halictidae	Halictinae	Halictus	duplocinctus		Vachal, 1902	R. Murao	2012	R. Murao	19/05/2004	KZ	Almaty Prov.	KZ16	Riverside, Ili river, Northwest of Kapchagay, Almaty Prov.			F		1
BeeCAsia0010244	BeeCAsia 32	28/5/2017	ELKU	BeeCAsia	Halictus (Halictus) duplocinctus	Animalia	Arthropoda	Insecta	Hymenoptera	Halictidae	Halictinae	Halictus	duplocinctus		Vachal, 1902	R. Murao	2012	R. Murao	19/05/2004	KZ	Almaty Prov.	KZ16	Riverside, Ili river, Northwest of Kapchagay, Almaty Prov.			F	host: Genitianaceae gen. et. sp.	1
BeeCAsia0011210	BeeCAsia 45	28/5/2017	ELKU	BeeCAsia	Lasioglossum (Hemihalictus) croceipes	Animalia	Arthropoda	Insecta	Hymenoptera	Halictidae	Halictinae	Lasioglossum	croceipes		(Morawitz, 1876)	R. Murao	2012	R. Murao	13/05/2004	KZ	Jambyl Prov.	KZ24	Karatau-Janatas, alt. 680 m, Jambyl Prov.			F		1
BeeCAsia0009745	BeeCAsia 31	28/5/2017	ELKU	BeeCAsia	Halictus (Halictus) brunnescens	Animalia	Arthropoda	Insecta	Hymenoptera	Halictidae	Halictinae	Halictus	brunnescens		(Eversmann, 1852)	R. Murao	2012	R. Murao	13/05/2004	KZ	Jambyl Prov.	KZ24	Karatau-Janatas, alt. 680 m, Jambyl Prov.			F		1
BeeCAsia0009746	BeeCAsia 31	28/5/2017	ELKU	BeeCAsia	Halictus (Halictus) brunnescens	Animalia	Arthropoda	Insecta	Hymenoptera	Halictidae	Halictinae	Halictus	brunnescens		(Eversmann, 1852)	R. Murao	2012	R. Murao	13/05/2004	KZ	Jambyl Prov.	KZ24	Karatau-Janatas, alt. 680 m, Jambyl Prov.			F		1
BeeCAsia0009747	BeeCAsia 31	28/5/2017	ELKU	BeeCAsia	Halictus (Halictus) brunnescens	Animalia	Arthropoda	Insecta	Hymenoptera	Halictidae	Halictinae	Halictus	brunnescens		(Eversmann, 1852)	R. Murao	2012	R. Murao	13/05/2004	KZ	Jambyl Prov.	KZ24	Karatau-Janatas, alt. 680 m, Jambyl Prov.			F		1
BeeCAsia0009748	BeeCAsia 31	28/5/2017	ELKU	BeeCAsia	Halictus (Halictus) brunnescens	Animalia	Arthropoda	Insecta	Hymenoptera	Halictidae	Halictinae	Halictus	brunnescens		(Eversmann, 1852)	R. Murao	2012	R. Murao	13/05/2004	KZ	Jambyl Prov.	KZ24	Karatau-Janatas, alt. 680 m, Jambyl Prov.			F		1
BeeCAsia0009752	BeeCAsia 31	28/5/2017	ELKU	BeeCAsia	Halictus (Halictus) brunnescens	Animalia	Arthropoda	Insecta	Hymenoptera	Halictidae	Halictinae	Halictus	brunnescens		(Eversmann, 1852)	R. Murao	2012	R. Murao	13/05/2004	KZ	Jambyl Prov.	KZ24	Karatau-Janatas, alt. 680 m, Jambyl Prov.			F	host: Tamarix sp.	1
BeeCAsia0009668	BeeCAsia 31	28/5/2017	ELKU	BeeCAsia	Halictus (Halictus) brunnescens	Animalia	Arthropoda	Insecta	Hymenoptera	Halictidae	Halictinae	Halictus	brunnescens		(Eversmann, 1852)	R. Murao	2012	R. Murao	13/05/2004	KZ	Jambyl Prov.	KZ24	Karatau-Janatas, alt. 680 m, Jambyl Prov.			F		1
BeeCAsia0010418	BeeCAsia 39	28/5/2017	ELKU	BeeCAsia	Halictus (Platyhalictus) minor	Animalia	Arthropoda	Insecta	Hymenoptera	Halictidae	Halictinae	Halictus	minor		Morawitz, 1876	R. Murao	2012	O. Tadauchi	01/06/2003	KZ	South Kazakhstan Prov.	KZ50	Kantagi, alt. 550-700 m, near Kentau, Mts. Karatau, South Kazakhstan Prov.			F		1
BeeCAsia0010433	BeeCAsia 39	28/5/2017	ELKU	BeeCAsia	Halictus (Hexataenites) resurgens	Animalia	Arthropoda	Insecta	Hymenoptera	Halictidae	Halictinae	Halictus	resurgens		Nurse, 1903	R. Murao	2012	O. Tadauchi	01/06/2003	KZ	South Kazakhstan Prov.	KZ50	Kantagi, alt. 550-700 m, near Kentau, Mts. Karatau, South Kazakhstan Prov.			F		1
BeeCAsia0010232	BeeCAsia 32	28/5/2017	ELKU	BeeCAsia	Halictus (Halictus) duplocinctus	Animalia	Arthropoda	Insecta	Hymenoptera	Halictidae	Halictinae	Halictus	duplocinctus		Vachal, 1902	R. Murao	2012	O. Tadauchi	01/06/2003	KZ	South Kazakhstan Prov.	KZ50	Kantagi, alt. 550-700 m, near Kentau, Mts. Karatau, South Kazakhstan Prov.			F		1
BeeCAsia0009756	BeeCAsia 31	28/5/2017	ELKU	BeeCAsia	Halictus (Halictus) brunnescens	Animalia	Arthropoda	Insecta	Hymenoptera	Halictidae	Halictinae	Halictus	brunnescens		(Eversmann, 1852)	R. Murao	2012	O. Tadauchi	02/06/2003	KZ	South Kazakhstan Prov.	KZ50	Kantagi, alt. 550-700 m, near Kentau, Mts. Karatau, South Kazakhstan Prov.			F	host: Cirsium sp.	1
BeeCAsia0011496	BeeCAsia 21	28/5/2017	ELKU	BeeCAsia	Halictus (Seladonia) seladonius	Animalia	Arthropoda	Insecta	Hymenoptera	Halictidae	Halictinae	Halictus	seladonius		(Fabricius, 1794)	R. Murao	2012	O. Tadauchi	01/06/2003	KZ	South Kazakhstan Prov.	KZ50	Kantagi, alt. 550-700 m, near Kentau, Mts. Karatau, South Kazakhstan Prov.			F		1
BeeCAsia0011497	BeeCAsia 21	28/5/2017	ELKU	BeeCAsia	Halictus (Seladonia) seladonius	Animalia	Arthropoda	Insecta	Hymenoptera	Halictidae	Halictinae	Halictus	seladonius		(Fabricius, 1794)	R. Murao	2012	O. Tadauchi	01/06/2003	KZ	South Kazakhstan Prov.	KZ50	Kantagi, alt. 550-700 m, near Kentau, Mts. Karatau, South Kazakhstan Prov.			F		1
BeeCAsia0009761	BeeCAsia 31	28/5/2017	ELKU	BeeCAsia	Halictus (Halictus) brunnescens	Animalia	Arthropoda	Insecta	Hymenoptera	Halictidae	Halictinae	Halictus	brunnescens		(Eversmann, 1852)	R. Murao	2012	O. Tadauchi	13/05/2004	KZ	Jambyl Prov.	kZ23	Karatau City, alt. 600 m, Jambyl Prov.			F		1
BeeCAsia0009762	BeeCAsia 31	28/5/2017	ELKU	BeeCAsia	Halictus (Halictus) brunnescens	Animalia	Arthropoda	Insecta	Hymenoptera	Halictidae	Halictinae	Halictus	brunnescens		(Eversmann, 1852)	R. Murao	2012	O. Tadauchi	13/05/2004	KZ	Jambyl Prov.	kZ23	Karatau City, alt. 600 m, Jambyl Prov.			F		1
BeeCAsia0009763	BeeCAsia 31	28/5/2017	ELKU	BeeCAsia	Halictus (Halictus) brunnescens	Animalia	Arthropoda	Insecta	Hymenoptera	Halictidae	Halictinae	Halictus	brunnescens		(Eversmann, 1852)	R. Murao	2012	O. Tadauchi	13/05/2004	KZ	Jambyl Prov.	kZ23	Karatau City, alt. 600 m, Jambyl Prov.			F		1
BeeCAsia0009764	BeeCAsia 31	28/5/2017	ELKU	BeeCAsia	Halictus (Halictus) brunnescens	Animalia	Arthropoda	Insecta	Hymenoptera	Halictidae	Halictinae	Halictus	brunnescens		(Eversmann, 1852)	R. Murao	2012	O. Tadauchi	13/05/2004	KZ	Jambyl Prov.	kZ23	Karatau City, alt. 600 m, Jambyl Prov.			F		1
BeeCAsia0010157	BeeCAsia 32	28/5/2017	ELKU	BeeCAsia	Halictus (Monilapis) compressus transvolgensis	Animalia	Arthropoda	Insecta	Hymenoptera	Halictidae	Halictinae	Halictus	compressus	transvolgensis	Pesenko, 1985	R. Murao	2012	O. Tadauchi	28/05/2003	KZ	South Kazakhstan Prov.	KZ37	Aksu Jabagly, alt. 1080-1830 m, South Kazakhstan Prov.			F		1
BeeCAsia0011649	BeeCAsia 19	28/5/2017	ELKU	BeeCAsia	Halictus (Mucoreohalictus) mucoreus	Animalia	Arthropoda	Insecta	Hymenoptera	Halictidae	Halictinae	Halictus	mucoreus		Eversmann, 1852	R. Murao	2012	A. Dawut	28/05/2000	KG	Bishkek	KG1	Bishkek City			F	host: Brassica sp.	1
BeeCAsia0011183	BeeCAsia 19	28/5/2017	ELKU	BeeCAsia	Halictus (Mucoreohalictus) mucidus	Animalia	Arthropoda	Insecta	Hymenoptera	Halictidae	Halictinae	Halictus	mucidus		Blüthgen, 1923	R. Murao	2012	O. Tadauchi	16/06/2003	KZ	South Kazakhstan Prov.	KZ38	Aksu Valley, Jabagly, alt. 130-560 m, South Kazakhstan Prov.			F		1
BeeCAsia0009979	BeeCAsia 39	28/5/2017	ELKU	BeeCAsia	Halictus (Hexataenites) resurgens	Animalia	Arthropoda	Insecta	Hymenoptera	Halictidae	Halictinae	Halictus	resurgens		Nurse, 1903	R. Murao	2012	O. Tadauchi	30/04/2004	KZ	South Kazakhstan Prov.	KZ56	Lake Charbarinskoe, Chordara, alt. 180 m, West of Tashkent, South Kazakhstan Prov.			F		1
BeeCAsia0009980	BeeCAsia 39	28/5/2017	ELKU	BeeCAsia	Halictus (Hexataenites) resurgens	Animalia	Arthropoda	Insecta	Hymenoptera	Halictidae	Halictinae	Halictus	resurgens		Nurse, 1903	R. Murao	2012	O. Tadauchi	30/04/2004	KZ	South Kazakhstan Prov.	KZ56	Lake Charbarinskoe, Chordara, alt. 180 m, West of Tashkent, South Kazakhstan Prov.			F		1
BeeCAsia0010417	BeeCAsia 39	28/5/2017	ELKU	BeeCAsia	Halictus (Platyhalictus) minor	Animalia	Arthropoda	Insecta	Hymenoptera	Halictidae	Halictinae	Halictus	minor		Morawitz, 1876	R. Murao	2012	O. Tadauchi	04/06/2003	KZ	South Kazakhstan Prov.	KZ35	Achisai, alt. 500-700 m, Mts. Karatau, South Kazakhstan Prov.			F		1
BeeCAsia0010011	BeeCAsia 32	28/5/2017	ELKU	BeeCAsia	Halictus (Protohalictus) bucharicus	Animalia	Arthropoda	Insecta	Hymenoptera	Halictidae	Halictinae	Halictus	bucharicus		Blüthgen, 1936	R. Murao	2012	O. Tadauchi	04/06/2003	KZ	South Kazakhstan Prov.	KZ35	Achisai, alt. 500-700 m, Mts. Karatau, South Kazakhstan Prov.			F		1
BeeCAsia0010048	BeeCAsia 39	28/5/2017	ELKU	BeeCAsia	Halictus (Platyhalictus) minor	Animalia	Arthropoda	Insecta	Hymenoptera	Halictidae	Halictinae	Halictus	minor		Morawitz, 1876	R. Murao	2012	O. Tadauchi	04/06/2003	KZ	South Kazakhstan Prov.	KZ35	Achisai, alt. 500-700 m, Mts. Karatau, South Kazakhstan Prov.			F		1
BeeCAsia0009695	BeeCAsia 31	28/5/2017	ELKU	BeeCAsia	Halictus (Halictus) brunnescens	Animalia	Arthropoda	Insecta	Hymenoptera	Halictidae	Halictinae	Halictus	brunnescens		(Eversmann, 1852)	R. Murao	2012	O. Tadauchi	04/06/2003	KZ	South Kazakhstan Prov.	KZ35	Achisai, alt. 500-700 m, Mts. Karatau, South Kazakhstan Prov.			F	host: Apiaceae gen. et. sp.	1
BeeCAsia0009707	BeeCAsia 31	28/5/2017	ELKU	BeeCAsia	Halictus (Halictus) brunnescens	Animalia	Arthropoda	Insecta	Hymenoptera	Halictidae	Halictinae	Halictus	brunnescens		(Eversmann, 1852)	R. Murao	2012	O. Tadauchi	04/06/2003	KZ	South Kazakhstan Prov.	KZ35	Achisai, alt. 500-700 m, Mts. Karatau, South Kazakhstan Prov.			F		1
BeeCAsia0009708	BeeCAsia 31	28/5/2017	ELKU	BeeCAsia	Halictus (Halictus) brunnescens	Animalia	Arthropoda	Insecta	Hymenoptera	Halictidae	Halictinae	Halictus	brunnescens		(Eversmann, 1852)	R. Murao	2012	O. Tadauchi	04/06/2003	KZ	South Kazakhstan Prov.	KZ35	Achisai, alt. 500-700 m, Mts. Karatau, South Kazakhstan Prov.			F		1
BeeCAsia0009711	BeeCAsia 31	28/5/2017	ELKU	BeeCAsia	Halictus (Halictus) brunnescens	Animalia	Arthropoda	Insecta	Hymenoptera	Halictidae	Halictinae	Halictus	brunnescens		(Eversmann, 1852)	R. Murao	2012	O. Tadauchi	04/06/2003	KZ	South Kazakhstan Prov.	KZ35	Achisai, alt. 500-700 m, Mts. Karatau, South Kazakhstan Prov.			F		1
BeeCAsia0010057	BeeCAsia 39	28/5/2017	ELKU	BeeCAsia	Halictus (Platyhalictus) minor	Animalia	Arthropoda	Insecta	Hymenoptera	Halictidae	Halictinae	Halictus	minor		Morawitz, 1876	R. Murao	2012	O. Tadauchi	04/06/2003	KZ	South Kazakhstan Prov.	KZ35	Achisai, alt. 500-700 m, Mts. Karatau, South Kazakhstan Prov.			F		1
BeeCAsia0010058	BeeCAsia 39	28/5/2017	ELKU	BeeCAsia	Halictus (Platyhalictus) minor	Animalia	Arthropoda	Insecta	Hymenoptera	Halictidae	Halictinae	Halictus	minor		Morawitz, 1876	R. Murao	2012	O. Tadauchi	04/06/2003	KZ	South Kazakhstan Prov.	KZ35	Achisai, alt. 500-700 m, Mts. Karatau, South Kazakhstan Prov.			F		1
BeeCAsia0009709	BeeCAsia 31	28/5/2017	ELKU	BeeCAsia	Halictus (Halictus) brunnescens	Animalia	Arthropoda	Insecta	Hymenoptera	Halictidae	Halictinae	Halictus	brunnescens		(Eversmann, 1852)	R. Murao	2012	O. Tadauchi	04/06/2003	KZ	South Kazakhstan Prov.	KZ35	Achisai, alt. 500-700 m, Mts. Karatau, South Kazakhstan Prov.			F	host: Fabaceae gen. et. sp.	1
BeeCAsia0010474	BeeCAsia 32	28/5/2017	ELKU	BeeCAsia	Halictus (Argalictus) senilis	Animalia	Arthropoda	Insecta	Hymenoptera	Halictidae	Halictinae	Halictus	senilis		(Eversmann, 1852)	R. Murao	2012	R. Murao	04/05/2004	KZ	South Kazakhstan Prov.	KZ60	Plain North of Karamola, Kyzylkum desert, South Kazakhstan Prov.			F		1
BeeCAsia0010435	BeeCAsia 39	28/5/2017	ELKU	BeeCAsia	Halictus (Hexataenites) resurgens	Animalia	Arthropoda	Insecta	Hymenoptera	Halictidae	Halictinae	Halictus	resurgens		Nurse, 1903	R. Murao	2012	R. Murao	03/05/2004	KZ	South Kazakhstan Prov.	KZ64	Sutkent village, North of Kamsomolskoe, South Kazakhstan Prov.			F		1
BeeCAsia0010436	BeeCAsia 39	28/5/2017	ELKU	BeeCAsia	Halictus (Hexataenites) resurgens	Animalia	Arthropoda	Insecta	Hymenoptera	Halictidae	Halictinae	Halictus	resurgens		Nurse, 1903	R. Murao	2012	R. Murao	03/05/2004	KZ	South Kazakhstan Prov.	KZ64	Sutkent village, North of Kamsomolskoe, South Kazakhstan Prov.			F		1
BeeCAsia0010437	BeeCAsia 39	28/5/2017	ELKU	BeeCAsia	Halictus (Hexataenites) resurgens	Animalia	Arthropoda	Insecta	Hymenoptera	Halictidae	Halictinae	Halictus	resurgens		Nurse, 1903	R. Murao	2012	R. Murao	03/05/2004	KZ	South Kazakhstan Prov.	KZ64	Sutkent village, North of Kamsomolskoe, South Kazakhstan Prov.			F		1
BeeCAsia0010438	BeeCAsia 39	28/5/2017	ELKU	BeeCAsia	Halictus (Hexataenites) resurgens	Animalia	Arthropoda	Insecta	Hymenoptera	Halictidae	Halictinae	Halictus	resurgens		Nurse, 1903	R. Murao	2012	R. Murao	03/05/2004	KZ	South Kazakhstan Prov.	KZ64	Sutkent village, North of Kamsomolskoe, South Kazakhstan Prov.			F		1
BeeCAsia0010439	BeeCAsia 39	28/5/2017	ELKU	BeeCAsia	Halictus (Hexataenites) resurgens	Animalia	Arthropoda	Insecta	Hymenoptera	Halictidae	Halictinae	Halictus	resurgens		Nurse, 1903	R. Murao	2012	R. Murao	03/05/2004	KZ	South Kazakhstan Prov.	KZ64	Sutkent village, North of Kamsomolskoe, South Kazakhstan Prov.			F		1
BeeCAsia0010480	BeeCAsia 32	28/5/2017	ELKU	BeeCAsia	Halictus (Argalictus) senilis	Animalia	Arthropoda	Insecta	Hymenoptera	Halictidae	Halictinae	Halictus	senilis		(Eversmann, 1852)	R. Murao	2012	R. Murao	03/05/2004	KZ	South Kazakhstan Prov.	KZ64	Sutkent village, North of Kamsomolskoe, South Kazakhstan Prov.			F		1
BeeCAsia0009949	BeeCAsia 39	28/5/2017	ELKU	BeeCAsia	Halictus (Hexataenites) resurgens	Animalia	Arthropoda	Insecta	Hymenoptera	Halictidae	Halictinae	Halictus	resurgens		Nurse, 1903	R. Murao	2012	R. Murao	03/05/2004	KZ	South Kazakhstan Prov.	KZ64	Sutkent village, North of Kamsomolskoe, South Kazakhstan Prov.			F		1
BeeCAsia0010166	BeeCAsia 31	28/5/2017	ELKU	BeeCAsia	Halictus (Halictus) brunnescens	Animalia	Arthropoda	Insecta	Hymenoptera	Halictidae	Halictinae	Halictus	brunnescens		(Eversmann, 1852)	R. Murao	2012	R. Murao	03/05/2004	KZ	South Kazakhstan Prov.	KZ64	Sutkent village, North of Kamsomolskoe, South Kazakhstan Prov.			F		1
BeeCAsia0010167	BeeCAsia 31	28/5/2017	ELKU	BeeCAsia	Halictus (Halictus) brunnescens	Animalia	Arthropoda	Insecta	Hymenoptera	Halictidae	Halictinae	Halictus	brunnescens		(Eversmann, 1852)	R. Murao	2012	R. Murao	03/05/2004	KZ	South Kazakhstan Prov.	KZ64	Sutkent village, North of Kamsomolskoe, South Kazakhstan Prov.			F		1
BeeCAsia0010168	BeeCAsia 31	28/5/2017	ELKU	BeeCAsia	Halictus (Halictus) brunnescens	Animalia	Arthropoda	Insecta	Hymenoptera	Halictidae	Halictinae	Halictus	brunnescens		(Eversmann, 1852)	R. Murao	2012	R. Murao	03/05/2004	KZ	South Kazakhstan Prov.	KZ64	Sutkent village, North of Kamsomolskoe, South Kazakhstan Prov.			F		1
BeeCAsia0010169	BeeCAsia 31	28/5/2017	ELKU	BeeCAsia	Halictus (Halictus) brunnescens	Animalia	Arthropoda	Insecta	Hymenoptera	Halictidae	Halictinae	Halictus	brunnescens		(Eversmann, 1852)	R. Murao	2012	R. Murao	03/05/2004	KZ	South Kazakhstan Prov.	KZ64	Sutkent village, North of Kamsomolskoe, South Kazakhstan Prov.			F		1
BeeCAsia0010170	BeeCAsia 31	28/5/2017	ELKU	BeeCAsia	Halictus (Halictus) brunnescens	Animalia	Arthropoda	Insecta	Hymenoptera	Halictidae	Halictinae	Halictus	brunnescens		(Eversmann, 1852)	R. Murao	2012	R. Murao	03/05/2004	KZ	South Kazakhstan Prov.	KZ64	Sutkent village, North of Kamsomolskoe, South Kazakhstan Prov.			F		1
BeeCAsia0010171	BeeCAsia 31	28/5/2017	ELKU	BeeCAsia	Halictus (Halictus) brunnescens	Animalia	Arthropoda	Insecta	Hymenoptera	Halictidae	Halictinae	Halictus	brunnescens		(Eversmann, 1852)	R. Murao	2012	R. Murao	03/05/2004	KZ	South Kazakhstan Prov.	KZ64	Sutkent village, North of Kamsomolskoe, South Kazakhstan Prov.			F		1
BeeCAsia0010412	BeeCAsia 32	28/5/2017	ELKU	BeeCAsia	Halictus (Monilapis) compressus transvolgensis	Animalia	Arthropoda	Insecta	Hymenoptera	Halictidae	Halictinae	Halictus	compressus	transvolgensis	Pesenko, 1985	R. Murao	2012	A. Dawut	29/05/2000	KZ	Almaty	KZ1	Almaty city			F	host: Trifolium repens	1
BeeCAsia0010175	BeeCAsia 31	28/5/2017	ELKU	BeeCAsia	Halictus (Halictus) brunnescens	Animalia	Arthropoda	Insecta	Hymenoptera	Halictidae	Halictinae	Halictus	brunnescens		(Eversmann, 1852)	R. Murao	2012	O. Tadauchi	29/05/2000	KZ	Almaty	KZ1	Almaty city			F	host: Vicia sp.	1
BeeCAsia0010176	BeeCAsia 31	28/5/2017	ELKU	BeeCAsia	Halictus (Halictus) brunnescens	Animalia	Arthropoda	Insecta	Hymenoptera	Halictidae	Halictinae	Halictus	brunnescens		(Eversmann, 1852)	R. Murao	2012	O. Tadauchi	10/06/2003	KZ	South Kazakhstan Prov.	KZ48	Jarekbas, near Shayan, South Kazakhstan Prov.			F		1
BeeCAsia0011650	BeeCAsia 19	28/5/2017	ELKU	BeeCAsia	Halictus (Mucoreohalictus) mucoreus	Animalia	Arthropoda	Insecta	Hymenoptera	Halictidae	Halictinae	Halictus	mucoreus		Eversmann, 1852	R. Murao	2012	A. Dawut	28/05/2000	KG	Bishkek	KG1	Bishkek City			F	host: Brassica sp.	1
BeeCAsia0010298	BeeCAsia 32	28/5/2017	ELKU	BeeCAsia	Halictus (Halictus) quadricinctus	Animalia	Arthropoda	Insecta	Hymenoptera	Halictidae	Halictinae	Halictus	quadricinctus		(Fabricius, 1776)	R. Murao	2012	O. Tadauchi	28/05/2000	KZ	Almaty	KZ3	Degeres, alt. 850 m, Almaty			F	host: Achillea sp.	1
BeeCAsia0010178	BeeCAsia 31	28/5/2017	ELKU	BeeCAsia	Halictus (Halictus) brunnescens	Animalia	Arthropoda	Insecta	Hymenoptera	Halictidae	Halictinae	Halictus	brunnescens		(Eversmann, 1852)	R. Murao	2012	O. Tadauchi	28/05/2000	KZ	Almaty	KZ3	Degeres, alt. 850 m, Almaty			F	host: Achillea sp.	1
BeeCAsia0010179	BeeCAsia 31	28/5/2017	ELKU	BeeCAsia	Halictus (Halictus) brunnescens	Animalia	Arthropoda	Insecta	Hymenoptera	Halictidae	Halictinae	Halictus	brunnescens		(Eversmann, 1852)	R. Murao	2012	O. Tadauchi	24/05/2000	KZ	Almaty	KZ8	Medew, Almaty			F	host: Taraxacum sp.	1
BeeCAsia0010182	BeeCAsia 31	28/5/2017	ELKU	BeeCAsia	Halictus (Halictus) brunnescens	Animalia	Arthropoda	Insecta	Hymenoptera	Halictidae	Halictinae	Halictus	brunnescens		(Eversmann, 1852)	R. Murao	2012	A. Dawut	28/05/2000	KZ	Almaty	KZ12	Uzenagash, Almaty			F	host: Brassica sp.	1
BeeCAsia0010181	BeeCAsia 31	28/5/2017	ELKU	BeeCAsia	Halictus (Halictus) brunnescens	Animalia	Arthropoda	Insecta	Hymenoptera	Halictidae	Halictinae	Halictus	brunnescens		(Eversmann, 1852)	R. Murao	2012	O. Tadauchi	26/05/2000	KZ	Almaty	KZ4	Fabrichini, alt. 850 m, Almaty			F	host: Leguminosae gen. et. sp.	1
BeeCAsia0010180	BeeCAsia 31	28/5/2017	ELKU	BeeCAsia	Halictus (Halictus) brunnescens	Animalia	Arthropoda	Insecta	Hymenoptera	Halictidae	Halictinae	Halictus	brunnescens		(Eversmann, 1852)	R. Murao	2012	O. Tadauchi	25/05/2000	KZ	Almaty	KZ11	Panpilof PK., Almaty			F	host: Taraxacum sp.	1
BeeCAsia0010830	BeeCAsia 20	28/5/2017	ELKU	BeeCAsia	Halictus (Seladonia) pjalmensis pjalmensis	Animalia	Arthropoda	Insecta	Hymenoptera	Halictidae	Halictinae	Halictus	pjalmensis	pjalmensis	Strand, 1909	R. Murao	2012	R. Murao	01/05/2004	KZ	South Kazakhstan Prov.	KZ49	Kamsomolskoe, North of Chordara, South Kazakhstan Prov.			F		1
BeeCAsia0010831	BeeCAsia 20	28/5/2017	ELKU	BeeCAsia	Halictus (Seladonia) pjalmensis pjalmensis	Animalia	Arthropoda	Insecta	Hymenoptera	Halictidae	Halictinae	Halictus	pjalmensis	pjalmensis	Strand, 1909	R. Murao	2012	R. Murao	01/05/2004	KZ	South Kazakhstan Prov.	KZ49	Kamsomolskoe, North of Chordara, South Kazakhstan Prov.			F		1
BeeCAsia0010486	BeeCAsia 32	28/5/2017	ELKU	BeeCAsia	Halictus (Argalictus) senilis	Animalia	Arthropoda	Insecta	Hymenoptera	Halictidae	Halictinae	Halictus	senilis		(Eversmann, 1852)	R. Murao	2012	R. Murao	30/04/2004	KZ	South Kazakhstan Prov.	KZ56	Lake Charbarinskoe, Chordara, alt. 180 m, West of Tashkent, South Kazakhstan Prov.			F		1
BeeCAsia0011421	BeeCAsia 20	28/5/2017	ELKU	BeeCAsia	Halictus (Seladonia) pjalmensis pjalmensis	Animalia	Arthropoda	Insecta	Hymenoptera	Halictidae	Halictinae	Halictus	pjalmensis	pjalmensis	Strand, 1909	R. Murao	2012	O. Tadauchi	01/05/2004	KZ	South Kazakhstan Prov.	KZ68	West of Kamsomolskoe, Kyzylkum desert, South Kazakhstan Prov.			F		1
BeeCAsia0009765	BeeCAsia 31	28/5/2017	ELKU	BeeCAsia	Halictus (Halictus) brunnescens	Animalia	Arthropoda	Insecta	Hymenoptera	Halictidae	Halictinae	Halictus	brunnescens		(Eversmann, 1852)	R. Murao	2012	O. Tadauchi	13/05/2004	KZ	Jambyl Prov.	kZ23	Karatau City, alt. 600 m, Jambyl Prov.			F		1
BeeCAsia0009766	BeeCAsia 31	28/5/2017	ELKU	BeeCAsia	Halictus (Halictus) brunnescens	Animalia	Arthropoda	Insecta	Hymenoptera	Halictidae	Halictinae	Halictus	brunnescens		(Eversmann, 1852)	R. Murao	2012	O. Tadauchi	13/05/2004	KZ	Jambyl Prov.	kZ23	Karatau City, alt. 600 m, Jambyl Prov.			F		1
BeeCAsia0009767	BeeCAsia 31	28/5/2017	ELKU	BeeCAsia	Halictus (Halictus) brunnescens	Animalia	Arthropoda	Insecta	Hymenoptera	Halictidae	Halictinae	Halictus	brunnescens		(Eversmann, 1852)	R. Murao	2012	O. Tadauchi	13/05/2004	KZ	Jambyl Prov.	kZ23	Karatau City, alt. 600 m, Jambyl Prov.			F		1
BeeCAsia0010102	BeeCAsia 32	28/5/2017	ELKU	BeeCAsia	Halictus (Monilapis) compressus transvolgensis	Animalia	Arthropoda	Insecta	Hymenoptera	Halictidae	Halictinae	Halictus	compressus	transvolgensis	Pesenko, 1985	R. Murao	2012	O. Tadauchi	17/06/2003	KZ	South Kazakhstan Prov.	KZ51	Karaalma alt. 1210 m, Near Jabagly, South Kazakhstan Prov.			F		1
BeeCAsia0010204	BeeCAsia 31	28/5/2017	ELKU	BeeCAsia	Halictus (Halictus) brunnescens	Animalia	Arthropoda	Insecta	Hymenoptera	Halictidae	Halictinae	Halictus	brunnescens		(Eversmann, 1852)	R. Murao	2012	O. Tadauchi	08/06/2003	KZ	South Kazakhstan Prov.	KZ63	Shayan-Birlik, South Kazakhstan Prov.			F		1
BeeCAsia0010203	BeeCAsia 31	28/5/2017	ELKU	BeeCAsia	Halictus (Halictus) brunnescens	Animalia	Arthropoda	Insecta	Hymenoptera	Halictidae	Halictinae	Halictus	brunnescens		(Eversmann, 1852)	R. Murao	2012	O. Tadauchi	08/06/2003	KZ	South Kazakhstan Prov.	KZ48	Jarekbas, near Shayan, South Kazakhstan Prov.			F		1
BeeCAsia0010207	BeeCAsia 31	28/5/2017	ELKU	BeeCAsia	Halictus (Halictus) brunnescens	Animalia	Arthropoda	Insecta	Hymenoptera	Halictidae	Halictinae	Halictus	brunnescens		(Eversmann, 1852)	R. Murao	2012	O. Tadauchi	08/06/2003	KZ	South Kazakhstan Prov.	KZ48	Jarekbas, near Shayan, South Kazakhstan Prov.			F		1
BeeCAsia0010216	BeeCAsia 31	28/5/2017	ELKU	BeeCAsia	Halictus (Halictus) brunnescens	Animalia	Arthropoda	Insecta	Hymenoptera	Halictidae	Halictinae	Halictus	brunnescens		(Eversmann, 1852)	R. Murao	2012	O. Tadauchi	08/06/2003	KZ	South Kazakhstan Prov.	KZ48	Jarekbas, near Shayan, South Kazakhstan Prov.			F		1
BeeCAsia0010210	BeeCAsia 31	28/5/2017	ELKU	BeeCAsia	Halictus (Halictus) brunnescens	Animalia	Arthropoda	Insecta	Hymenoptera	Halictidae	Halictinae	Halictus	brunnescens		(Eversmann, 1852)	R. Murao	2012	O. Tadauchi	07/09/2002	KZ	South Kazakhstan Prov.	KZ51	Karaalma alt. 1210 m, Near Jabagly, South Kazakhstan Prov.			F	host: Mentha asiatica	1
BeeCAsia0010209	BeeCAsia 31	28/5/2017	ELKU	BeeCAsia	Halictus (Halictus) brunnescens	Animalia	Arthropoda	Insecta	Hymenoptera	Halictidae	Halictinae	Halictus	brunnescens		(Eversmann, 1852)	R. Murao	2012	O. Tadauchi	07/09/2002	KZ	South Kazakhstan Prov.	KZ51	Karaalma alt. 1210 m, Near Jabagly, South Kazakhstan Prov.			F	host: Cirsium sp.	1
BeeCAsia0010197	BeeCAsia 31	28/5/2017	ELKU	BeeCAsia	Halictus (Halictus) brunnescens	Animalia	Arthropoda	Insecta	Hymenoptera	Halictidae	Halictinae	Halictus	brunnescens		(Eversmann, 1852)	R. Murao	2012	O. Tadauchi	12/06/2003	KZ	South Kazakhstan Prov.	KZ62	Seslavino, alt. 960 m, Daubaba river, South Kazakhstan Prov.			F	host: Cirsium sp.	1
BeeCAsia0010200	BeeCAsia 31	28/5/2017	ELKU	BeeCAsia	Halictus (Halictus) brunnescens	Animalia	Arthropoda	Insecta	Hymenoptera	Halictidae	Halictinae	Halictus	brunnescens		(Eversmann, 1852)	R. Murao	2012	O. Tadauchi	31/08/2002	KZ	Almaty Prov.	KZ17	South of Almaty, alt. 1580 m, Almaty Prov.			F		1
BeeCAsia0010199	BeeCAsia 31	28/5/2017	ELKU	BeeCAsia	Halictus (Halictus) brunnescens	Animalia	Arthropoda	Insecta	Hymenoptera	Halictidae	Halictinae	Halictus	brunnescens		(Eversmann, 1852)	R. Murao	2012	O. Tadauchi	31/08/2002	KZ	Almaty	KZ1	Almaty city			F		1
BeeCAsia0009579	BeeCAsia 31	28/5/2017	ELKU	BeeCAsia	Halictus (Halictus) brunnescens	Animalia	Arthropoda	Insecta	Hymenoptera	Halictidae	Halictinae	Halictus	brunnescens		(Eversmann, 1852)	R. Murao	2012	O. Tadauchi	13/06/2003	KZ	South Kazakhstan Prov.	KZ42	Daubaba, alt. 700-800 m, South Kazakhstan Prov.			F		1
BeeCAsia0010183	BeeCAsia 31	28/5/2017	ELKU	BeeCAsia	Halictus (Halictus) brunnescens	Animalia	Arthropoda	Insecta	Hymenoptera	Halictidae	Halictinae	Halictus	brunnescens		(Eversmann, 1852)	R. Murao	2012	O. Tadauchi	01/09/2002	KZ	Almaty Prov.	KZ13	Big Almaty Lake, alt. 1230-2050 m, Almaty Prov.			F		1
BeeCAsia0010184	BeeCAsia 31	28/5/2017	ELKU	BeeCAsia	Halictus (Halictus) brunnescens	Animalia	Arthropoda	Insecta	Hymenoptera	Halictidae	Halictinae	Halictus	brunnescens		(Eversmann, 1852)	R. Murao	2012	O. Tadauchi	01/09/2002	KZ	Almaty Prov.	KZ13	Big Almaty Lake, alt. 1230-2050 m, Almaty Prov.			F		1
BeeCAsia0010185	BeeCAsia 31	28/5/2017	ELKU	BeeCAsia	Halictus (Halictus) brunnescens	Animalia	Arthropoda	Insecta	Hymenoptera	Halictidae	Halictinae	Halictus	brunnescens		(Eversmann, 1852)	R. Murao	2012	O. Tadauchi	01/09/2002	KZ	Almaty Prov.	KZ13	Big Almaty Lake, alt. 1230-2050 m, Almaty Prov.			F		1
BeeCAsia0010186	BeeCAsia 31	28/5/2017	ELKU	BeeCAsia	Halictus (Halictus) brunnescens	Animalia	Arthropoda	Insecta	Hymenoptera	Halictidae	Halictinae	Halictus	brunnescens		(Eversmann, 1852)	R. Murao	2012	O. Tadauchi	01/09/2002	KZ	Almaty Prov.	KZ13	Big Almaty Lake, alt. 1230-2050 m, Almaty Prov.			F		1
BeeCAsia0010198	BeeCAsia 31	28/5/2017	ELKU	BeeCAsia	Halictus (Halictus) brunnescens	Animalia	Arthropoda	Insecta	Hymenoptera	Halictidae	Halictinae	Halictus	brunnescens		(Eversmann, 1852)	R. Murao	2012	O. Tadauchi	01/09/2002	KZ	Almaty Prov.	KZ13	Big Almaty Lake, alt. 1230-2050 m, Almaty Prov.			F		1
BeeCAsia0010241	BeeCAsia 32	28/5/2017	ELKU	BeeCAsia	Halictus (Halictus) duplocinctus	Animalia	Arthropoda	Insecta	Hymenoptera	Halictidae	Halictinae	Halictus	duplocinctus		Vachal, 1902	R. Murao	2012	O. Tadauchi	01/09/2002	KZ	Almaty Prov.	KZ13	Big Almaty Lake, alt. 1230-2050 m, Almaty Prov.			F		1
BeeCAsia0010211	BeeCAsia 31	28/5/2017	ELKU	BeeCAsia	Halictus (Halictus) brunnescens	Animalia	Arthropoda	Insecta	Hymenoptera	Halictidae	Halictinae	Halictus	brunnescens		(Eversmann, 1852)	R. Murao	2012	O. Tadauchi	01/09/2002	KZ	Almaty Prov.	KZ13	Big Almaty Lake, alt. 1230-2050 m, Almaty Prov.			F		1
BeeCAsia0009573	BeeCAsia 31	28/5/2017	ELKU	BeeCAsia	Halictus (Halictus) brunnescens	Animalia	Arthropoda	Insecta	Hymenoptera	Halictidae	Halictinae	Halictus	brunnescens		(Eversmann, 1852)	R. Murao	2012	O. Tadauchi	01/09/2002	KZ	Almaty Prov.	KZ13	Big Almaty Lake, alt. 1230-2050 m, Almaty Prov.			F		1
BeeCAsia0009586	BeeCAsia 31	28/5/2017	ELKU	BeeCAsia	Halictus (Halictus) brunnescens	Animalia	Arthropoda	Insecta	Hymenoptera	Halictidae	Halictinae	Halictus	brunnescens		(Eversmann, 1852)	R. Murao	2012	R. Murao	01/09/2002	KZ	Almaty Prov.	KZ13	Big Almaty Lake, alt. 1230-2050 m, Almaty Prov.			F		1
BeeCAsia0009587	BeeCAsia 31	28/5/2017	ELKU	BeeCAsia	Halictus (Halictus) brunnescens	Animalia	Arthropoda	Insecta	Hymenoptera	Halictidae	Halictinae	Halictus	brunnescens		(Eversmann, 1852)	R. Murao	2012	R. Murao	01/09/2002	KZ	Almaty Prov.	KZ13	Big Almaty Lake, alt. 1230-2050 m, Almaty Prov.			F		1
BeeCAsia0009583	BeeCAsia 31	28/5/2017	ELKU	BeeCAsia	Halictus (Halictus) brunnescens	Animalia	Arthropoda	Insecta	Hymenoptera	Halictidae	Halictinae	Halictus	brunnescens		(Eversmann, 1852)	R. Murao	2012	R. Murao	07/09/2002	KZ	South Kazakhstan Prov.	KZ37	Aksu Jabagly, alt. 1080-1830 m, South Kazakhstan Prov.			F	host: Polygonaceae gen. et. sp.	1
BeeCAsia0010423	BeeCAsia 39	28/5/2017	ELKU	BeeCAsia	Halictus (Platyhalictus) minor	Animalia	Arthropoda	Insecta	Hymenoptera	Halictidae	Halictinae	Halictus	minor		Morawitz, 1876	R. Murao	2012	O. Tadauchi	04/09/2002	KZ	South Kazakhstan Prov.	KZ37	Aksu Jabagly, alt. 1080-1830 m, South Kazakhstan Prov.			F		1
BeeCAsia0010158	BeeCAsia 32	28/5/2017	ELKU	BeeCAsia	Halictus (Monilapis) compressus transvolgensis	Animalia	Arthropoda	Insecta	Hymenoptera	Halictidae	Halictinae	Halictus	compressus	transvolgensis	Pesenko, 1985	R. Murao	2012	O. Tadauchi	28/05/2003	KZ	South Kazakhstan Prov.	KZ37	Aksu Jabagly, alt. 1080-1830 m, South Kazakhstan Prov.			F		1
BeeCAsia0010193	BeeCAsia 31	28/5/2017	ELKU	BeeCAsia	Halictus (Halictus) brunnescens	Animalia	Arthropoda	Insecta	Hymenoptera	Halictidae	Halictinae	Halictus	brunnescens		(Eversmann, 1852)	R. Murao	2012	V. Lina	03/05/2004	KZ	South Kazakhstan Prov.	KZ37	Aksu Jabagly, alt. 1080-1830 m, South Kazakhstan Prov.			F		1
BeeCAsia0010201	BeeCAsia 31	28/5/2017	ELKU	BeeCAsia	Halictus (Halictus) brunnescens	Animalia	Arthropoda	Insecta	Hymenoptera	Halictidae	Halictinae	Halictus	brunnescens		(Eversmann, 1852)	R. Murao	2012	A. Dawut	27/08/2002	CN	Altay Prov.	CN2	Jeminay County, alt. 800-1050 m, Altay Prov., Xinjiang Uygur Aut. Reg.			F		1
BeeCAsia0010213	BeeCAsia 31	28/5/2017	ELKU	BeeCAsia	Halictus (Halictus) brunnescens	Animalia	Arthropoda	Insecta	Hymenoptera	Halictidae	Halictinae	Halictus	brunnescens		(Eversmann, 1852)	R. Murao	2012	O. Tadauchi	27/08/2002	CN	Altay Prov.	CN2	Jeminay County, alt. 800-1050 m, Altay Prov., Xinjiang Uygur Aut. Reg.			F		1
BeeCAsia0010481	BeeCAsia 32	28/5/2017	ELKU	BeeCAsia	Halictus (Argalictus) senilis	Animalia	Arthropoda	Insecta	Hymenoptera	Halictidae	Halictinae	Halictus	senilis		(Eversmann, 1852)	R. Murao	2012	O. Tadauchi	02/05/2004	KZ	South Kazakhstan Prov.	KZ55	Kyzylkum desert, South Kazakhstan Prov.			F		1
BeeCAsia0010482	BeeCAsia 32	28/5/2017	ELKU	BeeCAsia	Halictus (Argalictus) senilis	Animalia	Arthropoda	Insecta	Hymenoptera	Halictidae	Halictinae	Halictus	senilis		(Eversmann, 1852)	R. Murao	2012	O. Tadauchi	02/05/2004	KZ	South Kazakhstan Prov.	KZ55	Kyzylkum desert, South Kazakhstan Prov.			F		1
BeeCAsia0009945	BeeCAsia 39	28/5/2017	ELKU	BeeCAsia	Halictus (Hexataenites) resurgens	Animalia	Arthropoda	Insecta	Hymenoptera	Halictidae	Halictinae	Halictus	resurgens		Nurse, 1903	R. Murao	2012	O. Tadauchi	30/04/2004	KZ	South Kazakhstan Prov.	KZ41	Chordara, alt. 200 m, West of Tashkent, South Kazakhstan Prov.			F		1
BeeCAsia0009981	BeeCAsia 39	28/5/2017	ELKU	BeeCAsia	Halictus (Hexataenites) resurgens	Animalia	Arthropoda	Insecta	Hymenoptera	Halictidae	Halictinae	Halictus	resurgens		Nurse, 1903	R. Murao	2012	O. Tadauchi	30/04/2004	KZ	South Kazakhstan Prov.	KZ56	Lake Charbarinskoe, Chordara, alt. 180 m, West of Tashkent, South Kazakhstan Prov.			F		1
BeeCAsia0009982	BeeCAsia 39	28/5/2017	ELKU	BeeCAsia	Halictus (Hexataenites) resurgens	Animalia	Arthropoda	Insecta	Hymenoptera	Halictidae	Halictinae	Halictus	resurgens		Nurse, 1903	R. Murao	2012	O. Tadauchi	30/04/2004	KZ	South Kazakhstan Prov.	KZ56	Lake Charbarinskoe, Chordara, alt. 180 m, West of Tashkent, South Kazakhstan Prov.			F		1
BeeCAsia0009983	BeeCAsia 39	28/5/2017	ELKU	BeeCAsia	Halictus (Hexataenites) resurgens	Animalia	Arthropoda	Insecta	Hymenoptera	Halictidae	Halictinae	Halictus	resurgens		Nurse, 1903	R. Murao	2012	O. Tadauchi	30/04/2004	KZ	South Kazakhstan Prov.	KZ56	Lake Charbarinskoe, Chordara, alt. 180 m, West of Tashkent, South Kazakhstan Prov.			F		1
BeeCAsia0010010	BeeCAsia 32	28/5/2017	ELKU	BeeCAsia	Halictus (Argalictus) senilis	Animalia	Arthropoda	Insecta	Hymenoptera	Halictidae	Halictinae	Halictus	senilis		(Eversmann, 1852)	R. Murao	2012	O. Tadauchi	30/04/2004	KZ	South Kazakhstan Prov.	KZ56	Lake Charbarinskoe, Chordara, alt. 180 m, West of Tashkent, South Kazakhstan Prov.			F		1
BeeCAsia0010469	BeeCAsia 32	28/5/2017	ELKU	BeeCAsia	Halictus (Tytthalictus) palustris	Animalia	Arthropoda	Insecta	Hymenoptera	Halictidae	Halictinae	Halictus	palustris		Morawitz, 1876	R. Murao	2012	O. Tadauchi	22/05/2004	KZ	Almaty Prov.	KZ13	Big Almaty Lake, alt. 1230-2050 m, Almaty Prov.			F		1
BeeCAsia0011124	BeeCAsia 19	28/5/2017	ELKU	BeeCAsia	Halictus (Mucoreohalictus) pollinosus cariniventris	Animalia	Arthropoda	Insecta	Hymenoptera	Halictidae	Halictinae	Halictus	pollinosus	cariniventris	Morawitz, 1876	R. Murao	2012	O. Tadauchi	04/09/2002	KZ	South Kazakhstan Prov.	KZ37	Aksu Jabagly, alt. 1080-1830 m, South Kazakhstan Prov.			M	host: Brassica sp.	1
BeeCAsia0011125	BeeCAsia 19	28/5/2017	ELKU	BeeCAsia	Halictus (Mucoreohalictus) pollinosus cariniventris	Animalia	Arthropoda	Insecta	Hymenoptera	Halictidae	Halictinae	Halictus	pollinosus	cariniventris	Morawitz, 1876	R. Murao	2012	O. Tadauchi	04/09/2002	KZ	South Kazakhstan Prov.	KZ37	Aksu Jabagly, alt. 1080-1830 m, South Kazakhstan Prov.			M	host: Mentha asiatica	1
BeeCAsia0011139	BeeCAsia 20	28/5/2017	ELKU	BeeCAsia	Halictus (Seladonia) seladonius	Animalia	Arthropoda	Insecta	Hymenoptera	Halictidae	Halictinae	Halictus	seladonius		(Fabricius, 1794)	R. Murao	2012	O. Tadauchi	04/09/2002	KZ	South Kazakhstan Prov.	KZ37	Aksu Jabagly, alt. 1080-1830 m, South Kazakhstan Prov.			M	host: Umbelliferae sp.	1
BeeCAsia0011140	BeeCAsia 20	28/5/2017	ELKU	BeeCAsia	Halictus (Seladonia) seladonius	Animalia	Arthropoda	Insecta	Hymenoptera	Halictidae	Halictinae	Halictus	seladonius		(Fabricius, 1794)	R. Murao	2012	O. Tadauchi	04/09/2002	KZ	South Kazakhstan Prov.	KZ37	Aksu Jabagly, alt. 1080-1830 m, South Kazakhstan Prov.			M	host: Umbelliferae sp.	1
BeeCAsia0009846	BeeCAsia 31	28/5/2017	ELKU	BeeCAsia	Halictus (Halictus) brunnescens	Animalia	Arthropoda	Insecta	Hymenoptera	Halictidae	Halictinae	Halictus	brunnescens		(Eversmann, 1852)	R. Murao	2012	O. Tadauchi	04/09/2002	KZ	South Kazakhstan Prov.	KZ37	Aksu Jabagly, alt. 1080-1830 m, South Kazakhstan Prov.			M	host: Mentha asiatica	1
BeeCAsia0009862	BeeCAsia 31	28/5/2017	ELKU	BeeCAsia	Halictus (Halictus) brunnescens	Animalia	Arthropoda	Insecta	Hymenoptera	Halictidae	Halictinae	Halictus	brunnescens		(Eversmann, 1852)	R. Murao	2012	O. Tadauchi	04/09/2002	KZ	South Kazakhstan Prov.	KZ37	Aksu Jabagly, alt. 1080-1830 m, South Kazakhstan Prov.			M		1
BeeCAsia0009863	BeeCAsia 31	28/5/2017	ELKU	BeeCAsia	Halictus (Halictus) brunnescens	Animalia	Arthropoda	Insecta	Hymenoptera	Halictidae	Halictinae	Halictus	brunnescens		(Eversmann, 1852)	R. Murao	2012	O. Tadauchi	04/09/2002	KZ	South Kazakhstan Prov.	KZ37	Aksu Jabagly, alt. 1080-1830 m, South Kazakhstan Prov.			M	host: Mentha asiatica	1
BeeCAsia0009865	BeeCAsia 31	28/5/2017	ELKU	BeeCAsia	Halictus (Halictus) brunnescens	Animalia	Arthropoda	Insecta	Hymenoptera	Halictidae	Halictinae	Halictus	brunnescens		(Eversmann, 1852)	R. Murao	2012	O. Tadauchi	04/09/2002	KZ	South Kazakhstan Prov.	KZ37	Aksu Jabagly, alt. 1080-1830 m, South Kazakhstan Prov.			M		1
BeeCAsia0009866	BeeCAsia 31	28/5/2017	ELKU	BeeCAsia	Halictus (Halictus) brunnescens	Animalia	Arthropoda	Insecta	Hymenoptera	Halictidae	Halictinae	Halictus	brunnescens		(Eversmann, 1852)	R. Murao	2012	O. Tadauchi	04/09/2002	KZ	South Kazakhstan Prov.	KZ37	Aksu Jabagly, alt. 1080-1830 m, South Kazakhstan Prov.			M		1
BeeCAsia0009867	BeeCAsia 31	28/5/2017	ELKU	BeeCAsia	Halictus (Halictus) brunnescens	Animalia	Arthropoda	Insecta	Hymenoptera	Halictidae	Halictinae	Halictus	brunnescens		(Eversmann, 1852)	R. Murao	2012	O. Tadauchi	04/09/2002	KZ	South Kazakhstan Prov.	KZ37	Aksu Jabagly, alt. 1080-1830 m, South Kazakhstan Prov.			M		1
BeeCAsia0009868	BeeCAsia 31	28/5/2017	ELKU	BeeCAsia	Halictus (Halictus) brunnescens	Animalia	Arthropoda	Insecta	Hymenoptera	Halictidae	Halictinae	Halictus	brunnescens		(Eversmann, 1852)	R. Murao	2012	O. Tadauchi	04/09/2002	KZ	South Kazakhstan Prov.	KZ37	Aksu Jabagly, alt. 1080-1830 m, South Kazakhstan Prov.			M		1
BeeCAsia0009869	BeeCAsia 31	28/5/2017	ELKU	BeeCAsia	Halictus (Halictus) brunnescens	Animalia	Arthropoda	Insecta	Hymenoptera	Halictidae	Halictinae	Halictus	brunnescens		(Eversmann, 1852)	R. Murao	2012	O. Tadauchi	04/09/2002	KZ	South Kazakhstan Prov.	KZ37	Aksu Jabagly, alt. 1080-1830 m, South Kazakhstan Prov.			M		1
BeeCAsia0009870	BeeCAsia 31	28/5/2017	ELKU	BeeCAsia	Halictus (Halictus) brunnescens	Animalia	Arthropoda	Insecta	Hymenoptera	Halictidae	Halictinae	Halictus	brunnescens		(Eversmann, 1852)	R. Murao	2012	O. Tadauchi	04/09/2002	KZ	South Kazakhstan Prov.	KZ37	Aksu Jabagly, alt. 1080-1830 m, South Kazakhstan Prov.			M		1
BeeCAsia0009871	BeeCAsia 31	28/5/2017	ELKU	BeeCAsia	Halictus (Halictus) brunnescens	Animalia	Arthropoda	Insecta	Hymenoptera	Halictidae	Halictinae	Halictus	brunnescens		(Eversmann, 1852)	R. Murao	2012	O. Tadauchi	04/09/2002	KZ	South Kazakhstan Prov.	KZ37	Aksu Jabagly, alt. 1080-1830 m, South Kazakhstan Prov.			M		1
BeeCAsia0009872	BeeCAsia 31	28/5/2017	ELKU	BeeCAsia	Halictus (Halictus) brunnescens	Animalia	Arthropoda	Insecta	Hymenoptera	Halictidae	Halictinae	Halictus	brunnescens		(Eversmann, 1852)	R. Murao	2012	O. Tadauchi	04/09/2002	KZ	South Kazakhstan Prov.	KZ37	Aksu Jabagly, alt. 1080-1830 m, South Kazakhstan Prov.			M		1
BeeCAsia0009873	BeeCAsia 31	28/5/2017	ELKU	BeeCAsia	Halictus (Halictus) brunnescens	Animalia	Arthropoda	Insecta	Hymenoptera	Halictidae	Halictinae	Halictus	brunnescens		(Eversmann, 1852)	R. Murao	2012	O. Tadauchi	04/09/2002	KZ	South Kazakhstan Prov.	KZ37	Aksu Jabagly, alt. 1080-1830 m, South Kazakhstan Prov.			M		1
BeeCAsia0009874	BeeCAsia 31	28/5/2017	ELKU	BeeCAsia	Halictus (Halictus) brunnescens	Animalia	Arthropoda	Insecta	Hymenoptera	Halictidae	Halictinae	Halictus	brunnescens		(Eversmann, 1852)	R. Murao	2012	O. Tadauchi	04/09/2002	KZ	South Kazakhstan Prov.	KZ37	Aksu Jabagly, alt. 1080-1830 m, South Kazakhstan Prov.			M		1
BeeCAsia0009875	BeeCAsia 31	28/5/2017	ELKU	BeeCAsia	Halictus (Halictus) brunnescens	Animalia	Arthropoda	Insecta	Hymenoptera	Halictidae	Halictinae	Halictus	brunnescens		(Eversmann, 1852)	R. Murao	2012	O. Tadauchi	04/09/2002	KZ	South Kazakhstan Prov.	KZ37	Aksu Jabagly, alt. 1080-1830 m, South Kazakhstan Prov.			M		1
BeeCAsia0009876	BeeCAsia 31	28/5/2017	ELKU	BeeCAsia	Halictus (Halictus) brunnescens	Animalia	Arthropoda	Insecta	Hymenoptera	Halictidae	Halictinae	Halictus	brunnescens		(Eversmann, 1852)	R. Murao	2012	O. Tadauchi	04/09/2002	KZ	South Kazakhstan Prov.	KZ37	Aksu Jabagly, alt. 1080-1830 m, South Kazakhstan Prov.			M		1
BeeCAsia0009877	BeeCAsia 31	28/5/2017	ELKU	BeeCAsia	Halictus (Halictus) brunnescens	Animalia	Arthropoda	Insecta	Hymenoptera	Halictidae	Halictinae	Halictus	brunnescens		(Eversmann, 1852)	R. Murao	2012	O. Tadauchi	04/09/2002	KZ	South Kazakhstan Prov.	KZ37	Aksu Jabagly, alt. 1080-1830 m, South Kazakhstan Prov.			M		1
BeeCAsia0009864	BeeCAsia 31	28/5/2017	ELKU	BeeCAsia	Halictus (Halictus) brunnescens	Animalia	Arthropoda	Insecta	Hymenoptera	Halictidae	Halictinae	Halictus	brunnescens		(Eversmann, 1852)	R. Murao	2012	O. Tadauchi	04/09/2002	KZ	South Kazakhstan Prov.	KZ37	Aksu Jabagly, alt. 1080-1830 m, South Kazakhstan Prov.			M	host: Mentha asiatica	1
BeeCAsia0009878	BeeCAsia 31	28/5/2017	ELKU	BeeCAsia	Halictus (Halictus) brunnescens	Animalia	Arthropoda	Insecta	Hymenoptera	Halictidae	Halictinae	Halictus	brunnescens		(Eversmann, 1852)	R. Murao	2012	O. Tadauchi	04/09/2002	KZ	South Kazakhstan Prov.	KZ37	Aksu Jabagly, alt. 1080-1830 m, South Kazakhstan Prov.			M	host: Mentha asiatica	1
BeeCAsia0009879	BeeCAsia 31	28/5/2017	ELKU	BeeCAsia	Halictus (Halictus) brunnescens	Animalia	Arthropoda	Insecta	Hymenoptera	Halictidae	Halictinae	Halictus	brunnescens		(Eversmann, 1852)	R. Murao	2012	O. Tadauchi	04/09/2002	KZ	South Kazakhstan Prov.	KZ37	Aksu Jabagly, alt. 1080-1830 m, South Kazakhstan Prov.			M	host: Mentha asiatica	1
BeeCAsia0009880	BeeCAsia 31	28/5/2017	ELKU	BeeCAsia	Halictus (Halictus) brunnescens	Animalia	Arthropoda	Insecta	Hymenoptera	Halictidae	Halictinae	Halictus	brunnescens		(Eversmann, 1852)	R. Murao	2012	O. Tadauchi	04/09/2002	KZ	South Kazakhstan Prov.	KZ37	Aksu Jabagly, alt. 1080-1830 m, South Kazakhstan Prov.			M	host: Mentha asiatica	1
BeeCAsia0009881	BeeCAsia 31	28/5/2017	ELKU	BeeCAsia	Halictus (Halictus) brunnescens	Animalia	Arthropoda	Insecta	Hymenoptera	Halictidae	Halictinae	Halictus	brunnescens		(Eversmann, 1852)	R. Murao	2012	O. Tadauchi	04/09/2002	KZ	South Kazakhstan Prov.	KZ37	Aksu Jabagly, alt. 1080-1830 m, South Kazakhstan Prov.			M	host: Mentha asiatica	1
BeeCAsia0009882	BeeCAsia 31	28/5/2017	ELKU	BeeCAsia	Halictus (Halictus) brunnescens	Animalia	Arthropoda	Insecta	Hymenoptera	Halictidae	Halictinae	Halictus	brunnescens		(Eversmann, 1852)	R. Murao	2012	O. Tadauchi	04/09/2002	KZ	South Kazakhstan Prov.	KZ37	Aksu Jabagly, alt. 1080-1830 m, South Kazakhstan Prov.			M	host: Mentha asiatica	1
BeeCAsia0009883	BeeCAsia 31	28/5/2017	ELKU	BeeCAsia	Halictus (Halictus) brunnescens	Animalia	Arthropoda	Insecta	Hymenoptera	Halictidae	Halictinae	Halictus	brunnescens		(Eversmann, 1852)	R. Murao	2012	O. Tadauchi	04/09/2002	KZ	South Kazakhstan Prov.	KZ37	Aksu Jabagly, alt. 1080-1830 m, South Kazakhstan Prov.			M	host: Mentha asiatica	1
BeeCAsia0009884	BeeCAsia 31	28/5/2017	ELKU	BeeCAsia	Halictus (Halictus) brunnescens	Animalia	Arthropoda	Insecta	Hymenoptera	Halictidae	Halictinae	Halictus	brunnescens		(Eversmann, 1852)	R. Murao	2012	O. Tadauchi	04/09/2002	KZ	South Kazakhstan Prov.	KZ37	Aksu Jabagly, alt. 1080-1830 m, South Kazakhstan Prov.			M	host: Mentha asiatica	1
BeeCAsia0009885	BeeCAsia 31	28/5/2017	ELKU	BeeCAsia	Halictus (Halictus) brunnescens	Animalia	Arthropoda	Insecta	Hymenoptera	Halictidae	Halictinae	Halictus	brunnescens		(Eversmann, 1852)	R. Murao	2012	O. Tadauchi	04/09/2002	KZ	South Kazakhstan Prov.	KZ37	Aksu Jabagly, alt. 1080-1830 m, South Kazakhstan Prov.			M	host: Mentha asiatica	1
BeeCAsia0009886	BeeCAsia 31	28/5/2017	ELKU	BeeCAsia	Halictus (Halictus) brunnescens	Animalia	Arthropoda	Insecta	Hymenoptera	Halictidae	Halictinae	Halictus	brunnescens		(Eversmann, 1852)	R. Murao	2012	O. Tadauchi	04/09/2002	KZ	South Kazakhstan Prov.	KZ37	Aksu Jabagly, alt. 1080-1830 m, South Kazakhstan Prov.			M	host: Mentha asiatica	1
BeeCAsia0009889	BeeCAsia 31	28/5/2017	ELKU	BeeCAsia	Halictus (Halictus) brunnescens	Animalia	Arthropoda	Insecta	Hymenoptera	Halictidae	Halictinae	Halictus	brunnescens		(Eversmann, 1852)	R. Murao	2012	O. Tadauchi	04/09/2002	KZ	South Kazakhstan Prov.	KZ37	Aksu Jabagly, alt. 1080-1830 m, South Kazakhstan Prov.			M		1
BeeCAsia0009887	BeeCAsia 31	28/5/2017	ELKU	BeeCAsia	Halictus (Halictus) brunnescens	Animalia	Arthropoda	Insecta	Hymenoptera	Halictidae	Halictinae	Halictus	brunnescens		(Eversmann, 1852)	R. Murao	2012	O. Tadauchi	04/09/2002	KZ	South Kazakhstan Prov.	KZ37	Aksu Jabagly, alt. 1080-1830 m, South Kazakhstan Prov.			M	host: Mentha asiatica	1
BeeCAsia0009890	BeeCAsia 31	28/5/2017	ELKU	BeeCAsia	Halictus (Halictus) brunnescens	Animalia	Arthropoda	Insecta	Hymenoptera	Halictidae	Halictinae	Halictus	brunnescens		(Eversmann, 1852)	R. Murao	2012	O. Tadauchi	04/09/2002	KZ	South Kazakhstan Prov.	KZ37	Aksu Jabagly, alt. 1080-1830 m, South Kazakhstan Prov.			M	host: Mentha asiatica	1
BeeCAsia0009859	BeeCAsia 31	28/5/2017	ELKU	BeeCAsia	Halictus (Halictus) brunnescens	Animalia	Arthropoda	Insecta	Hymenoptera	Halictidae	Halictinae	Halictus	brunnescens		(Eversmann, 1852)	R. Murao	2012	R. Miyanaga	04/09/2002	KZ	South Kazakhstan Prov.	KZ37	Aksu Jabagly, alt. 1080-1830 m, South Kazakhstan Prov.			M	host: Asteraceae gen. et. sp.	1
BeeCAsia0009860	BeeCAsia 31	28/5/2017	ELKU	BeeCAsia	Halictus (Halictus) brunnescens	Animalia	Arthropoda	Insecta	Hymenoptera	Halictidae	Halictinae	Halictus	brunnescens		(Eversmann, 1852)	R. Murao	2012	R. Miyanaga	04/09/2002	KZ	South Kazakhstan Prov.	KZ37	Aksu Jabagly, alt. 1080-1830 m, South Kazakhstan Prov.			M	host: Asteraceae gen. et. sp.	1
BeeCAsia0009861	BeeCAsia 31	28/5/2017	ELKU	BeeCAsia	Halictus (Halictus) brunnescens	Animalia	Arthropoda	Insecta	Hymenoptera	Halictidae	Halictinae	Halictus	brunnescens		(Eversmann, 1852)	R. Murao	2012	R. Miyanaga	04/09/2002	KZ	South Kazakhstan Prov.	KZ37	Aksu Jabagly, alt. 1080-1830 m, South Kazakhstan Prov.			M	host: Asteraceae gen. et. sp.	1
BeeCAsia0009787	BeeCAsia 31	28/5/2017	ELKU	BeeCAsia	Halictus (Halictus) brunnescens	Animalia	Arthropoda	Insecta	Hymenoptera	Halictidae	Halictinae	Halictus	brunnescens		(Eversmann, 1852)	R. Murao	2012	R. Miyanaga	04/09/2002	KZ	South Kazakhstan Prov.	KZ37	Aksu Jabagly, alt. 1080-1830 m, South Kazakhstan Prov.			M	host: Asteraceae gen. et. sp.	1
BeeCAsia0009788	BeeCAsia 31	28/5/2017	ELKU	BeeCAsia	Halictus (Halictus) brunnescens	Animalia	Arthropoda	Insecta	Hymenoptera	Halictidae	Halictinae	Halictus	brunnescens		(Eversmann, 1852)	R. Murao	2012	R. Miyanaga	04/09/2002	KZ	South Kazakhstan Prov.	KZ37	Aksu Jabagly, alt. 1080-1830 m, South Kazakhstan Prov.			M	host: Asteraceae gen. et. sp.	1
BeeCAsia0009789	BeeCAsia 31	28/5/2017	ELKU	BeeCAsia	Halictus (Halictus) brunnescens	Animalia	Arthropoda	Insecta	Hymenoptera	Halictidae	Halictinae	Halictus	brunnescens		(Eversmann, 1852)	R. Murao	2012	R. Miyanaga	04/09/2002	KZ	South Kazakhstan Prov.	KZ37	Aksu Jabagly, alt. 1080-1830 m, South Kazakhstan Prov.			M	host: Asteraceae gen. et. sp.	1
BeeCAsia0009921	BeeCAsia 32	28/5/2017	ELKU	BeeCAsia	Halictus (Halictus) duplocinctus	Animalia	Arthropoda	Insecta	Hymenoptera	Halictidae	Halictinae	Halictus	duplocinctus		Vachal, 1902	R. Murao	2012	R. Miyanaga	04/09/2002	KZ	South Kazakhstan Prov.	KZ37	Aksu Jabagly, alt. 1080-1830 m, South Kazakhstan Prov.			M	host: Asteraceae gen. et. sp.	1
BeeCAsia0009790	BeeCAsia 31	28/5/2017	ELKU	BeeCAsia	Halictus (Halictus) brunnescens	Animalia	Arthropoda	Insecta	Hymenoptera	Halictidae	Halictinae	Halictus	brunnescens		(Eversmann, 1852)	R. Murao	2012	R. Murao	04/09/2002	KZ	South Kazakhstan Prov.	KZ37	Aksu Jabagly, alt. 1080-1830 m, South Kazakhstan Prov.			M	host: Mentha asiatica	1
BeeCAsia0009791	BeeCAsia 31	28/5/2017	ELKU	BeeCAsia	Halictus (Halictus) brunnescens	Animalia	Arthropoda	Insecta	Hymenoptera	Halictidae	Halictinae	Halictus	brunnescens		(Eversmann, 1852)	R. Murao	2012	R. Murao	04/09/2002	KZ	South Kazakhstan Prov.	KZ37	Aksu Jabagly, alt. 1080-1830 m, South Kazakhstan Prov.			M	host: Cichorium intybus	1
BeeCAsia0009792	BeeCAsia 31	28/5/2017	ELKU	BeeCAsia	Halictus (Halictus) brunnescens	Animalia	Arthropoda	Insecta	Hymenoptera	Halictidae	Halictinae	Halictus	brunnescens		(Eversmann, 1852)	R. Murao	2012	R. Murao	04/09/2002	KZ	South Kazakhstan Prov.	KZ37	Aksu Jabagly, alt. 1080-1830 m, South Kazakhstan Prov.			M		1
BeeCAsia0009793	BeeCAsia 31	28/5/2017	ELKU	BeeCAsia	Halictus (Halictus) brunnescens	Animalia	Arthropoda	Insecta	Hymenoptera	Halictidae	Halictinae	Halictus	brunnescens		(Eversmann, 1852)	R. Murao	2012	R. Murao	04/09/2002	KZ	South Kazakhstan Prov.	KZ37	Aksu Jabagly, alt. 1080-1830 m, South Kazakhstan Prov.			M	host: Cichorium intybus	1
BeeCAsia0009794	BeeCAsia 31	28/5/2017	ELKU	BeeCAsia	Halictus (Halictus) brunnescens	Animalia	Arthropoda	Insecta	Hymenoptera	Halictidae	Halictinae	Halictus	brunnescens		(Eversmann, 1852)	R. Murao	2012	R. Murao	04/09/2002	KZ	South Kazakhstan Prov.	KZ37	Aksu Jabagly, alt. 1080-1830 m, South Kazakhstan Prov.			M	host: Mentha asiatica	1
BeeCAsia0009795	BeeCAsia 31	28/5/2017	ELKU	BeeCAsia	Halictus (Halictus) brunnescens	Animalia	Arthropoda	Insecta	Hymenoptera	Halictidae	Halictinae	Halictus	brunnescens		(Eversmann, 1852)	R. Murao	2012	R. Murao	04/09/2002	KZ	South Kazakhstan Prov.	KZ37	Aksu Jabagly, alt. 1080-1830 m, South Kazakhstan Prov.			M	host: Mentha asiatica	1
BeeCAsia0009796	BeeCAsia 31	28/5/2017	ELKU	BeeCAsia	Halictus (Halictus) brunnescens	Animalia	Arthropoda	Insecta	Hymenoptera	Halictidae	Halictinae	Halictus	brunnescens		(Eversmann, 1852)	R. Murao	2012	R. Murao	04/09/2002	KZ	South Kazakhstan Prov.	KZ37	Aksu Jabagly, alt. 1080-1830 m, South Kazakhstan Prov.			M	host: Mentha asiatica	1
BeeCAsia0009798	BeeCAsia 31	28/5/2017	ELKU	BeeCAsia	Halictus (Halictus) brunnescens	Animalia	Arthropoda	Insecta	Hymenoptera	Halictidae	Halictinae	Halictus	brunnescens		(Eversmann, 1852)	R. Murao	2012	R. Murao	03/09/2002	KZ	South Kazakhstan Prov.	KZ37	Aksu Jabagly, alt. 1080-1830 m, South Kazakhstan Prov.			M		1
BeeCAsia0009799	BeeCAsia 31	28/5/2017	ELKU	BeeCAsia	Halictus (Halictus) brunnescens	Animalia	Arthropoda	Insecta	Hymenoptera	Halictidae	Halictinae	Halictus	brunnescens		(Eversmann, 1852)	R. Murao	2012	R. Murao	03/09/2002	KZ	South Kazakhstan Prov.	KZ37	Aksu Jabagly, alt. 1080-1830 m, South Kazakhstan Prov.			M		1
BeeCAsia0009934	BeeCAsia 19	28/5/2017	ELKU	BeeCAsia	Halictus (Mucoreohalictus) mucidus	Animalia	Arthropoda	Insecta	Hymenoptera	Halictidae	Halictinae	Halictus	mucidus		Blüthgen, 1923	R. Murao	2012	R. Murao	07/09/2002	KZ	South Kazakhstan Prov.	KZ37	Aksu Jabagly, alt. 1080-1830 m, South Kazakhstan Prov.			M	host: Chondrilla sp.	1
BeeCAsia0009802	BeeCAsia 31	28/5/2017	ELKU	BeeCAsia	Halictus (Halictus) brunnescens	Animalia	Arthropoda	Insecta	Hymenoptera	Halictidae	Halictinae	Halictus	brunnescens		(Eversmann, 1852)	R. Murao	2012	O. Tadauchi	04/09/2002	KZ	South Kazakhstan Prov.	KZ37	Aksu Jabagly, alt. 1080-1830 m, South Kazakhstan Prov.			M	host: Mentha asiatica	1
BeeCAsia0009803	BeeCAsia 31	28/5/2017	ELKU	BeeCAsia	Halictus (Halictus) brunnescens	Animalia	Arthropoda	Insecta	Hymenoptera	Halictidae	Halictinae	Halictus	brunnescens		(Eversmann, 1852)	R. Murao	2012	O. Tadauchi	04/09/2002	KZ	South Kazakhstan Prov.	KZ37	Aksu Jabagly, alt. 1080-1830 m, South Kazakhstan Prov.			M	host: Mentha asiatica	1
BeeCAsia0009806	BeeCAsia 31	28/5/2017	ELKU	BeeCAsia	Halictus (Halictus) brunnescens	Animalia	Arthropoda	Insecta	Hymenoptera	Halictidae	Halictinae	Halictus	brunnescens		(Eversmann, 1852)	R. Murao	2012	O. Tadauchi	04/09/2002	KZ	South Kazakhstan Prov.	KZ37	Aksu Jabagly, alt. 1080-1830 m, South Kazakhstan Prov.			M	host: Mentha asiatica	1
BeeCAsia0009804	BeeCAsia 31	28/5/2017	ELKU	BeeCAsia	Halictus (Halictus) brunnescens	Animalia	Arthropoda	Insecta	Hymenoptera	Halictidae	Halictinae	Halictus	brunnescens		(Eversmann, 1852)	R. Murao	2012	O. Tadauchi	04/09/2002	KZ	South Kazakhstan Prov.	KZ37	Aksu Jabagly, alt. 1080-1830 m, South Kazakhstan Prov.			M	host: Aster canescens	1
BeeCAsia0009805	BeeCAsia 31	28/5/2017	ELKU	BeeCAsia	Halictus (Halictus) brunnescens	Animalia	Arthropoda	Insecta	Hymenoptera	Halictidae	Halictinae	Halictus	brunnescens		(Eversmann, 1852)	R. Murao	2012	O. Tadauchi	04/09/2002	KZ	South Kazakhstan Prov.	KZ37	Aksu Jabagly, alt. 1080-1830 m, South Kazakhstan Prov.			M	host: Aster canescens	1
BeeCAsia0009809	BeeCAsia 31	28/5/2017	ELKU	BeeCAsia	Halictus (Halictus) brunnescens	Animalia	Arthropoda	Insecta	Hymenoptera	Halictidae	Halictinae	Halictus	brunnescens		(Eversmann, 1852)	R. Murao	2012	O. Tadauchi	04/09/2002	KZ	South Kazakhstan Prov.	KZ37	Aksu Jabagly, alt. 1080-1830 m, South Kazakhstan Prov.			M	host: Mentha asiatica	1
BeeCAsia0009810	BeeCAsia 31	28/5/2017	ELKU	BeeCAsia	Halictus (Halictus) brunnescens	Animalia	Arthropoda	Insecta	Hymenoptera	Halictidae	Halictinae	Halictus	brunnescens		(Eversmann, 1852)	R. Murao	2012	O. Tadauchi	04/09/2002	KZ	South Kazakhstan Prov.	KZ37	Aksu Jabagly, alt. 1080-1830 m, South Kazakhstan Prov.			M	host: Mentha asiatica	1
BeeCAsia0009811	BeeCAsia 31	28/5/2017	ELKU	BeeCAsia	Halictus (Halictus) brunnescens	Animalia	Arthropoda	Insecta	Hymenoptera	Halictidae	Halictinae	Halictus	brunnescens		(Eversmann, 1852)	R. Murao	2012	O. Tadauchi	04/09/2002	KZ	South Kazakhstan Prov.	KZ37	Aksu Jabagly, alt. 1080-1830 m, South Kazakhstan Prov.			M	host: Mentha asiatica	1
BeeCAsia0009812	BeeCAsia 31	28/5/2017	ELKU	BeeCAsia	Halictus (Halictus) brunnescens	Animalia	Arthropoda	Insecta	Hymenoptera	Halictidae	Halictinae	Halictus	brunnescens		(Eversmann, 1852)	R. Murao	2012	O. Tadauchi	04/09/2002	KZ	South Kazakhstan Prov.	KZ37	Aksu Jabagly, alt. 1080-1830 m, South Kazakhstan Prov.			M	host: Mentha asiatica	1
BeeCAsia0009813	BeeCAsia 31	28/5/2017	ELKU	BeeCAsia	Halictus (Halictus) brunnescens	Animalia	Arthropoda	Insecta	Hymenoptera	Halictidae	Halictinae	Halictus	brunnescens		(Eversmann, 1852)	R. Murao	2012	O. Tadauchi	04/09/2002	KZ	South Kazakhstan Prov.	KZ37	Aksu Jabagly, alt. 1080-1830 m, South Kazakhstan Prov.			M	host: Mentha asiatica	1
BeeCAsia0009814	BeeCAsia 31	28/5/2017	ELKU	BeeCAsia	Halictus (Halictus) brunnescens	Animalia	Arthropoda	Insecta	Hymenoptera	Halictidae	Halictinae	Halictus	brunnescens		(Eversmann, 1852)	R. Murao	2012	O. Tadauchi	04/09/2002	KZ	South Kazakhstan Prov.	KZ37	Aksu Jabagly, alt. 1080-1830 m, South Kazakhstan Prov.			M	host: Mentha asiatica	1
BeeCAsia0009815	BeeCAsia 31	28/5/2017	ELKU	BeeCAsia	Halictus (Halictus) brunnescens	Animalia	Arthropoda	Insecta	Hymenoptera	Halictidae	Halictinae	Halictus	brunnescens		(Eversmann, 1852)	R. Murao	2012	O. Tadauchi	04/09/2002	KZ	South Kazakhstan Prov.	KZ37	Aksu Jabagly, alt. 1080-1830 m, South Kazakhstan Prov.			M	host: Mentha asiatica	1
BeeCAsia0009816	BeeCAsia 31	28/5/2017	ELKU	BeeCAsia	Halictus (Halictus) brunnescens	Animalia	Arthropoda	Insecta	Hymenoptera	Halictidae	Halictinae	Halictus	brunnescens		(Eversmann, 1852)	R. Murao	2012	O. Tadauchi	04/09/2002	KZ	South Kazakhstan Prov.	KZ37	Aksu Jabagly, alt. 1080-1830 m, South Kazakhstan Prov.			M	host: Mentha asiatica	1
BeeCAsia0011117	BeeCAsia 19	28/5/2017	ELKU	BeeCAsia	Halictus (Mucoreohalictus) mucidus	Animalia	Arthropoda	Insecta	Hymenoptera	Halictidae	Halictinae	Halictus	mucidus		Blüthgen, 1923	R. Murao	2012	O. Tadauchi	04/09/2002	KZ	South Kazakhstan Prov.	KZ37	Aksu Jabagly, alt. 1080-1830 m, South Kazakhstan Prov.			M		1
BeeCAsia0009818	BeeCAsia 31	28/5/2017	ELKU	BeeCAsia	Halictus (Halictus) brunnescens	Animalia	Arthropoda	Insecta	Hymenoptera	Halictidae	Halictinae	Halictus	brunnescens		(Eversmann, 1852)	R. Murao	2012	O. Tadauchi	04/09/2002	KZ	South Kazakhstan Prov.	KZ37	Aksu Jabagly, alt. 1080-1830 m, South Kazakhstan Prov.			M	host: Mentha asiatica	1
BeeCAsia0009819	BeeCAsia 31	28/5/2017	ELKU	BeeCAsia	Halictus (Halictus) brunnescens	Animalia	Arthropoda	Insecta	Hymenoptera	Halictidae	Halictinae	Halictus	brunnescens		(Eversmann, 1852)	R. Murao	2012	O. Tadauchi	04/09/2002	KZ	South Kazakhstan Prov.	KZ37	Aksu Jabagly, alt. 1080-1830 m, South Kazakhstan Prov.			M	host: Mentha asiatica	1
BeeCAsia0009807	BeeCAsia 31	28/5/2017	ELKU	BeeCAsia	Halictus (Halictus) brunnescens	Animalia	Arthropoda	Insecta	Hymenoptera	Halictidae	Halictinae	Halictus	brunnescens		(Eversmann, 1852)	R. Murao	2012	O. Tadauchi	04/09/2002	KZ	South Kazakhstan Prov.	KZ37	Aksu Jabagly, alt. 1080-1830 m, South Kazakhstan Prov.			M	host: Aster canescens	1
BeeCAsia0009821	BeeCAsia 31	28/5/2017	ELKU	BeeCAsia	Halictus (Halictus) brunnescens	Animalia	Arthropoda	Insecta	Hymenoptera	Halictidae	Halictinae	Halictus	brunnescens		(Eversmann, 1852)	R. Murao	2012	O. Tadauchi	04/09/2002	KZ	South Kazakhstan Prov.	KZ37	Aksu Jabagly, alt. 1080-1830 m, South Kazakhstan Prov.			M	host: Mentha asiatica	1
BeeCAsia0009822	BeeCAsia 31	28/5/2017	ELKU	BeeCAsia	Halictus (Halictus) brunnescens	Animalia	Arthropoda	Insecta	Hymenoptera	Halictidae	Halictinae	Halictus	brunnescens		(Eversmann, 1852)	R. Murao	2012	O. Tadauchi	04/09/2002	KZ	South Kazakhstan Prov.	KZ37	Aksu Jabagly, alt. 1080-1830 m, South Kazakhstan Prov.			M	host: Mentha asiatica	1
BeeCAsia0009823	BeeCAsia 31	28/5/2017	ELKU	BeeCAsia	Halictus (Halictus) brunnescens	Animalia	Arthropoda	Insecta	Hymenoptera	Halictidae	Halictinae	Halictus	brunnescens		(Eversmann, 1852)	R. Murao	2012	O. Tadauchi	04/09/2002	KZ	South Kazakhstan Prov.	KZ37	Aksu Jabagly, alt. 1080-1830 m, South Kazakhstan Prov.			M	host: Mentha asiatica	1
BeeCAsia0011118	BeeCAsia 19	28/5/2017	ELKU	BeeCAsia	Halictus (Mucoreohalictus) mucidus	Animalia	Arthropoda	Insecta	Hymenoptera	Halictidae	Halictinae	Halictus	mucidus		Blüthgen, 1923	R. Murao	2012	O. Tadauchi	04/09/2002	KZ	South Kazakhstan Prov.	KZ37	Aksu Jabagly, alt. 1080-1830 m, South Kazakhstan Prov.			M		1
BeeCAsia0009825	BeeCAsia 31	28/5/2017	ELKU	BeeCAsia	Halictus (Halictus) brunnescens	Animalia	Arthropoda	Insecta	Hymenoptera	Halictidae	Halictinae	Halictus	brunnescens		(Eversmann, 1852)	R. Murao	2012	R. Miyanaga	04/09/2002	KZ	South Kazakhstan Prov.	KZ37	Aksu Jabagly, alt. 1080-1830 m, South Kazakhstan Prov.			M	host: Origanum tyttanthum	1
BeeCAsia0009826	BeeCAsia 31	28/5/2017	ELKU	BeeCAsia	Halictus (Halictus) brunnescens	Animalia	Arthropoda	Insecta	Hymenoptera	Halictidae	Halictinae	Halictus	brunnescens		(Eversmann, 1852)	R. Murao	2012	R. Miyanaga	04/09/2002	KZ	South Kazakhstan Prov.	KZ37	Aksu Jabagly, alt. 1080-1830 m, South Kazakhstan Prov.			M	host: Origanum tyttanthum	1
BeeCAsia0009827	BeeCAsia 31	28/5/2017	ELKU	BeeCAsia	Halictus (Halictus) brunnescens	Animalia	Arthropoda	Insecta	Hymenoptera	Halictidae	Halictinae	Halictus	brunnescens		(Eversmann, 1852)	R. Murao	2012	R. Murao	04/09/2002	KZ	South Kazakhstan Prov.	KZ37	Aksu Jabagly, alt. 1080-1830 m, South Kazakhstan Prov.			M		1
BeeCAsia0009828	BeeCAsia 31	28/5/2017	ELKU	BeeCAsia	Halictus (Halictus) brunnescens	Animalia	Arthropoda	Insecta	Hymenoptera	Halictidae	Halictinae	Halictus	brunnescens		(Eversmann, 1852)	R. Murao	2012	R. Murao	04/09/2002	KZ	South Kazakhstan Prov.	KZ37	Aksu Jabagly, alt. 1080-1830 m, South Kazakhstan Prov.			M		1
BeeCAsia0009829	BeeCAsia 31	28/5/2017	ELKU	BeeCAsia	Halictus (Halictus) brunnescens	Animalia	Arthropoda	Insecta	Hymenoptera	Halictidae	Halictinae	Halictus	brunnescens		(Eversmann, 1852)	R. Murao	2012	R. Murao	04/09/2002	KZ	South Kazakhstan Prov.	KZ37	Aksu Jabagly, alt. 1080-1830 m, South Kazakhstan Prov.			M		1
BeeCAsia0009830	BeeCAsia 31	28/5/2017	ELKU	BeeCAsia	Halictus (Halictus) brunnescens	Animalia	Arthropoda	Insecta	Hymenoptera	Halictidae	Halictinae	Halictus	brunnescens		(Eversmann, 1852)	R. Murao	2012	R. Murao	04/09/2002	KZ	South Kazakhstan Prov.	KZ37	Aksu Jabagly, alt. 1080-1830 m, South Kazakhstan Prov.			M	host: Mentha asiatica	1
BeeCAsia0009831	BeeCAsia 31	28/5/2017	ELKU	BeeCAsia	Halictus (Halictus) brunnescens	Animalia	Arthropoda	Insecta	Hymenoptera	Halictidae	Halictinae	Halictus	brunnescens		(Eversmann, 1852)	R. Murao	2012	R. Murao	04/09/2002	KZ	South Kazakhstan Prov.	KZ37	Aksu Jabagly, alt. 1080-1830 m, South Kazakhstan Prov.			M		1
BeeCAsia0009832	BeeCAsia 31	28/5/2017	ELKU	BeeCAsia	Halictus (Halictus) brunnescens	Animalia	Arthropoda	Insecta	Hymenoptera	Halictidae	Halictinae	Halictus	brunnescens		(Eversmann, 1852)	R. Murao	2012	R. Murao	04/09/2002	KZ	South Kazakhstan Prov.	KZ37	Aksu Jabagly, alt. 1080-1830 m, South Kazakhstan Prov.			M		1
BeeCAsia0010546	BeeCAsia 31	28/5/2017	ELKU	BeeCAsia	Halictus (Halictus) brunnescens	Animalia	Arthropoda	Insecta	Hymenoptera	Halictidae	Halictinae	Halictus	brunnescens		(Eversmann, 1852)	R. Murao	2012	R. Murao	04/09/2002	KZ	South Kazakhstan Prov.	KZ37	Aksu Jabagly, alt. 1080-1830 m, South Kazakhstan Prov.			M		1
BeeCAsia0009833	BeeCAsia 31	28/5/2017	ELKU	BeeCAsia	Halictus (Halictus) brunnescens	Animalia	Arthropoda	Insecta	Hymenoptera	Halictidae	Halictinae	Halictus	brunnescens		(Eversmann, 1852)	R. Murao	2012	R. Murao	04/09/2002	KZ	South Kazakhstan Prov.	KZ37	Aksu Jabagly, alt. 1080-1830 m, South Kazakhstan Prov.			M	host: Mentha asiatica	1
BeeCAsia0009834	BeeCAsia 31	28/5/2017	ELKU	BeeCAsia	Halictus (Halictus) brunnescens	Animalia	Arthropoda	Insecta	Hymenoptera	Halictidae	Halictinae	Halictus	brunnescens		(Eversmann, 1852)	R. Murao	2012	R. Murao	04/09/2002	KZ	South Kazakhstan Prov.	KZ37	Aksu Jabagly, alt. 1080-1830 m, South Kazakhstan Prov.			M	host: Mentha asiatica	1
BeeCAsia0009835	BeeCAsia 31	28/5/2017	ELKU	BeeCAsia	Halictus (Halictus) brunnescens	Animalia	Arthropoda	Insecta	Hymenoptera	Halictidae	Halictinae	Halictus	brunnescens		(Eversmann, 1852)	R. Murao	2012	R. Murao	04/09/2002	KZ	South Kazakhstan Prov.	KZ37	Aksu Jabagly, alt. 1080-1830 m, South Kazakhstan Prov.			M	host: Mentha asiatica	1
BeeCAsia0009836	BeeCAsia 31	28/5/2017	ELKU	BeeCAsia	Halictus (Halictus) brunnescens	Animalia	Arthropoda	Insecta	Hymenoptera	Halictidae	Halictinae	Halictus	brunnescens		(Eversmann, 1852)	R. Murao	2012	R. Murao	04/09/2002	KZ	South Kazakhstan Prov.	KZ37	Aksu Jabagly, alt. 1080-1830 m, South Kazakhstan Prov.			M	host: Mentha asiatica	1
BeeCAsia0009837	BeeCAsia 31	28/5/2017	ELKU	BeeCAsia	Halictus (Halictus) brunnescens	Animalia	Arthropoda	Insecta	Hymenoptera	Halictidae	Halictinae	Halictus	brunnescens		(Eversmann, 1852)	R. Murao	2012	R. Murao	04/09/2002	KZ	South Kazakhstan Prov.	KZ37	Aksu Jabagly, alt. 1080-1830 m, South Kazakhstan Prov.			M	host: Cichorium intybus	1
BeeCAsia0009838	BeeCAsia 31	28/5/2017	ELKU	BeeCAsia	Halictus (Halictus) brunnescens	Animalia	Arthropoda	Insecta	Hymenoptera	Halictidae	Halictinae	Halictus	brunnescens		(Eversmann, 1852)	R. Murao	2012	R. Murao	04/09/2002	KZ	South Kazakhstan Prov.	KZ37	Aksu Jabagly, alt. 1080-1830 m, South Kazakhstan Prov.			M	host: Cichorium intybus	1
BeeCAsia0009839	BeeCAsia 31	28/5/2017	ELKU	BeeCAsia	Halictus (Halictus) brunnescens	Animalia	Arthropoda	Insecta	Hymenoptera	Halictidae	Halictinae	Halictus	brunnescens		(Eversmann, 1852)	R. Murao	2012	R. Murao	04/09/2002	KZ	South Kazakhstan Prov.	KZ37	Aksu Jabagly, alt. 1080-1830 m, South Kazakhstan Prov.			M	host: Cichorium intybus	1
BeeCAsia0009840	BeeCAsia 31	28/5/2017	ELKU	BeeCAsia	Halictus (Halictus) brunnescens	Animalia	Arthropoda	Insecta	Hymenoptera	Halictidae	Halictinae	Halictus	brunnescens		(Eversmann, 1852)	R. Murao	2012	R. Murao	04/09/2002	KZ	South Kazakhstan Prov.	KZ37	Aksu Jabagly, alt. 1080-1830 m, South Kazakhstan Prov.			M	host: Rosaceae gen. et. sp.	1
BeeCAsia0009841	BeeCAsia 31	28/5/2017	ELKU	BeeCAsia	Halictus (Halictus) brunnescens	Animalia	Arthropoda	Insecta	Hymenoptera	Halictidae	Halictinae	Halictus	brunnescens		(Eversmann, 1852)	R. Murao	2012	R. Murao	04/09/2002	KZ	South Kazakhstan Prov.	KZ37	Aksu Jabagly, alt. 1080-1830 m, South Kazakhstan Prov.			M	host: Trifolium repens	1
BeeCAsia0009842	BeeCAsia 31	28/5/2017	ELKU	BeeCAsia	Halictus (Halictus) brunnescens	Animalia	Arthropoda	Insecta	Hymenoptera	Halictidae	Halictinae	Halictus	brunnescens		(Eversmann, 1852)	R. Murao	2012	R. Murao	04/09/2002	KZ	South Kazakhstan Prov.	KZ37	Aksu Jabagly, alt. 1080-1830 m, South Kazakhstan Prov.			M	host: Trifolium repens	1
BeeCAsia0009888	BeeCAsia 31	28/5/2017	ELKU	BeeCAsia	Halictus (Halictus) brunnescens	Animalia	Arthropoda	Insecta	Hymenoptera	Halictidae	Halictinae	Halictus	brunnescens		(Eversmann, 1852)	R. Murao	2012	R. Murao	04/09/2002	KZ	South Kazakhstan Prov.	KZ37	Aksu Jabagly, alt. 1080-1830 m, South Kazakhstan Prov.			M	host: Trifolium repens	1
BeeCAsia0009852	BeeCAsia 31	28/5/2017	ELKU	BeeCAsia	Halictus (Halictus) brunnescens	Animalia	Arthropoda	Insecta	Hymenoptera	Halictidae	Halictinae	Halictus	brunnescens		(Eversmann, 1852)	R. Murao	2012	O. Tadauchi	07/09/2002	KZ	South Kazakhstan Prov.	KZ51	Karaalma alt. 1210 m, Near Jabagly, South Kazakhstan Prov.			M	host: Mentha asiatica	1
BeeCAsia0009853	BeeCAsia 31	28/5/2017	ELKU	BeeCAsia	Halictus (Halictus) brunnescens	Animalia	Arthropoda	Insecta	Hymenoptera	Halictidae	Halictinae	Halictus	brunnescens		(Eversmann, 1852)	R. Murao	2012	O. Tadauchi	07/09/2002	KZ	South Kazakhstan Prov.	KZ51	Karaalma alt. 1210 m, Near Jabagly, South Kazakhstan Prov.			M	host: Geranium sp.	1
BeeCAsia0011121	BeeCAsia 19	28/5/2017	ELKU	BeeCAsia	Halictus (Mucoreohalictus) mucidus	Animalia	Arthropoda	Insecta	Hymenoptera	Halictidae	Halictinae	Halictus	mucidus		Blüthgen, 1923	R. Murao	2012	O. Tadauchi	06/09/2002	KZ	South Kazakhstan Prov.	KZ38	Aksu Valley, Jabagly, alt. 130-560 m, South Kazakhstan Prov.			M	host: Cichorium intybus	1
BeeCAsia0009855	BeeCAsia 31	28/5/2017	ELKU	BeeCAsia	Halictus (Halictus) brunnescens	Animalia	Arthropoda	Insecta	Hymenoptera	Halictidae	Halictinae	Halictus	brunnescens		(Eversmann, 1852)	R. Murao	2012	R. Murao	06/09/2002	KZ	South Kazakhstan Prov.	KZ38	Aksu Valley, Jabagly, alt. 130-560 m, South Kazakhstan Prov.			M	host: Cirsium sp.	1
BeeCAsia0009856	BeeCAsia 31	28/5/2017	ELKU	BeeCAsia	Halictus (Halictus) brunnescens	Animalia	Arthropoda	Insecta	Hymenoptera	Halictidae	Halictinae	Halictus	brunnescens		(Eversmann, 1852)	R. Murao	2012	R. Murao	06/09/2002	KZ	South Kazakhstan Prov.	KZ38	Aksu Valley, Jabagly, alt. 130-560 m, South Kazakhstan Prov.			M	host: Asteraceae gen. et. sp.	1
BeeCAsia0009922	BeeCAsia 32	28/5/2017	ELKU	BeeCAsia	Halictus (Halictus) duplocinctus	Animalia	Arthropoda	Insecta	Hymenoptera	Halictidae	Halictinae	Halictus	duplocinctus		Vachal, 1902	R. Murao	2012	R. Murao	06/09/2002	KZ	South Kazakhstan Prov.	KZ38	Aksu Valley, Jabagly, alt. 130-560 m, South Kazakhstan Prov.			M	host: Asteraceae gen. et. sp.	1
BeeCAsia0011049	BeeCAsia 21	28/5/2017	ELKU	BeeCAsia	Halictus (Vestitohalictus) pulvereus	Animalia	Arthropoda	Insecta	Hymenoptera	Halictidae	Halictinae	Halictus	pulvereus		Morawitz, 1874	R. Murao	2012	R. Murao	03/09/2002	KZ	Jambyl Prov.	KZ21	East of Taraz, alt. 570-600 m, Jambyl Prov.	73.4167	42.9833	M	host: Tamarix sp.	1
BeeCAsia0009854	BeeCAsia 31	28/5/2017	ELKU	BeeCAsia	Halictus (Halictus) brunnescens	Animalia	Arthropoda	Insecta	Hymenoptera	Halictidae	Halictinae	Halictus	brunnescens		(Eversmann, 1852)	R. Murao	2012	O. Tadauchi	06/09/2002	KZ	South Kazakhstan Prov.	KZ38	Aksu Valley, Jabagly, alt. 130-560 m, South Kazakhstan Prov.			M	host: Cichorium intybus	1
BeeCAsia0010502	BeeCAsia 31	28/5/2017	ELKU	BeeCAsia	Halictus (Halictus) brunnescens	Animalia	Arthropoda	Insecta	Hymenoptera	Halictidae	Halictinae	Halictus	brunnescens		(Eversmann, 1852)	R. Murao	2012	O. Tadauchi	04/09/2002	KZ	South Kazakhstan Prov.	KZ37	Aksu Jabagly, alt. 1080-1830 m, South Kazakhstan Prov.			M	host: Mentha asiatica	1
BeeCAsia0011120	BeeCAsia 19	28/5/2017	ELKU	BeeCAsia	Halictus (Mucoreohalictus) mucidus	Animalia	Arthropoda	Insecta	Hymenoptera	Halictidae	Halictinae	Halictus	mucidus		Blüthgen, 1923	R. Murao	2012	O. Tadauchi	05/09/2002	KZ	South Kazakhstan Prov.	KZ66	Ulken-Kaindy, Jabagly, alt. 1090-2000 m, South Kazakhstan Prov.			M	host: Aster canescens	1
BeeCAsia0011756	BeeCAsia 45	28/5/2017	ELKU	BeeCAsia	Lasioglossum (Hemihalictus) croceipes	Animalia	Arthropoda	Insecta	Hymenoptera	Halictidae	Halictinae	Lasioglossum	croceipes		(Morawitz, 1876)	R. Murao	2012	O. Tadauchi	01/06/2003	KZ	South Kazakhstan Prov.	KZ50	Kantagi, alt. 550-700 m, near Kentau, Mts. Karatau, South Kazakhstan Prov.			F		1
BeeCAsia0011757	BeeCAsia 45	28/5/2017	ELKU	BeeCAsia	Lasioglossum (Hemihalictus) croceipes	Animalia	Arthropoda	Insecta	Hymenoptera	Halictidae	Halictinae	Lasioglossum	croceipes		(Morawitz, 1876)	R. Murao	2012	O. Tadauchi	01/06/2003	KZ	South Kazakhstan Prov.	KZ50	Kantagi, alt. 550-700 m, near Kentau, Mts. Karatau, South Kazakhstan Prov.			F		1
BeeCAsia0011758	BeeCAsia 45	28/5/2017	ELKU	BeeCAsia	Lasioglossum (Hemihalictus) croceipes	Animalia	Arthropoda	Insecta	Hymenoptera	Halictidae	Halictinae	Lasioglossum	croceipes		(Morawitz, 1876)	R. Murao	2012	O. Tadauchi	01/06/2003	KZ	South Kazakhstan Prov.	KZ50	Kantagi, alt. 550-700 m, near Kentau, Mts. Karatau, South Kazakhstan Prov.			F		1
BeeCAsia0010339	BeeCAsia 32	28/5/2017	ELKU	BeeCAsia	Halictus (Protohalictus) bucharicus	Animalia	Arthropoda	Insecta	Hymenoptera	Halictidae	Halictinae	Halictus	bucharicus		Blüthgen, 1936	R. Murao	2012	O. Tadauchi	05/06/2003	KZ	South Kazakhstan Prov.	KZ35	Achisai, alt. 500-700 m, Mts. Karatau, South Kazakhstan Prov.			F		1
BeeCAsia0010340	BeeCAsia 32	28/5/2017	ELKU	BeeCAsia	Halictus (Protohalictus) bucharicus	Animalia	Arthropoda	Insecta	Hymenoptera	Halictidae	Halictinae	Halictus	bucharicus		Blüthgen, 1936	R. Murao	2012	O. Tadauchi	05/06/2003	KZ	South Kazakhstan Prov.	KZ35	Achisai, alt. 500-700 m, Mts. Karatau, South Kazakhstan Prov.			F		1
BeeCAsia0010341	BeeCAsia 32	28/5/2017	ELKU	BeeCAsia	Halictus (Protohalictus) bucharicus	Animalia	Arthropoda	Insecta	Hymenoptera	Halictidae	Halictinae	Halictus	bucharicus		Blüthgen, 1936	R. Murao	2012	O. Tadauchi	05/06/2003	KZ	South Kazakhstan Prov.	KZ35	Achisai, alt. 500-700 m, Mts. Karatau, South Kazakhstan Prov.			F		1
BeeCAsia0011438	BeeCAsia 20	28/5/2017	ELKU	BeeCAsia	Halictus (Seladonia) pjalmensis pjalmensis	Animalia	Arthropoda	Insecta	Hymenoptera	Halictidae	Halictinae	Halictus	pjalmensis	pjalmensis	Strand, 1909	R. Murao	2012	O. Tadauchi	05/06/2003	KZ	South Kazakhstan Prov.	KZ35	Achisai, alt. 500-700 m, Mts. Karatau, South Kazakhstan Prov.			F		1
BeeCAsia0011439	BeeCAsia 20	28/5/2017	ELKU	BeeCAsia	Halictus (Seladonia) pjalmensis pjalmensis	Animalia	Arthropoda	Insecta	Hymenoptera	Halictidae	Halictinae	Halictus	pjalmensis	pjalmensis	Strand, 1909	R. Murao	2012	O. Tadauchi	05/06/2003	KZ	South Kazakhstan Prov.	KZ35	Achisai, alt. 500-700 m, Mts. Karatau, South Kazakhstan Prov.			F		1
BeeCAsia0011765	BeeCAsia 45	28/5/2017	ELKU	BeeCAsia	Lasioglossum (Hemihalictus) croceipes	Animalia	Arthropoda	Insecta	Hymenoptera	Halictidae	Halictinae	Lasioglossum	croceipes		(Morawitz, 1876)	R. Murao	2012	O. Tadauchi	05/06/2003	KZ	South Kazakhstan Prov.	KZ35	Achisai, alt. 500-700 m, Mts. Karatau, South Kazakhstan Prov.			F		1
BeeCAsia0011784	BeeCAsia 45	28/5/2017	ELKU	BeeCAsia	Lasioglossum (Hemihalictus) croceipes	Animalia	Arthropoda	Insecta	Hymenoptera	Halictidae	Halictinae	Lasioglossum	croceipes		(Morawitz, 1876)	R. Murao	2012	O. Tadauchi	05/06/2003	KZ	South Kazakhstan Prov.	KZ35	Achisai, alt. 500-700 m, Mts. Karatau, South Kazakhstan Prov.			F		1
BeeCAsia0011786	BeeCAsia 45	28/5/2017	ELKU	BeeCAsia	Lasioglossum (Hemihalictus) croceipes	Animalia	Arthropoda	Insecta	Hymenoptera	Halictidae	Halictinae	Lasioglossum	croceipes		(Morawitz, 1876)	R. Murao	2012	O. Tadauchi	05/06/2003	KZ	South Kazakhstan Prov.	KZ35	Achisai, alt. 500-700 m, Mts. Karatau, South Kazakhstan Prov.			F		1
BeeCAsia0010345	BeeCAsia 32	28/5/2017	ELKU	BeeCAsia	Halictus (Protohalictus) bucharicus	Animalia	Arthropoda	Insecta	Hymenoptera	Halictidae	Halictinae	Halictus	bucharicus		Blüthgen, 1936	R. Murao	2012	K. Mitai	05/06/2003	KZ	South Kazakhstan Prov.	KZ35	Achisai, alt. 500-700 m, Mts. Karatau, South Kazakhstan Prov.			F	host: Ferula tenuisecta	1
BeeCAsia0010346	BeeCAsia 32	28/5/2017	ELKU	BeeCAsia	Halictus (Protohalictus) bucharicus	Animalia	Arthropoda	Insecta	Hymenoptera	Halictidae	Halictinae	Halictus	bucharicus		Blüthgen, 1936	R. Murao	2012	K. Mitai	05/06/2003	KZ	South Kazakhstan Prov.	KZ35	Achisai, alt. 500-700 m, Mts. Karatau, South Kazakhstan Prov.			F	host: Ferula tenuisecta	1
BeeCAsia0010347	BeeCAsia 32	28/5/2017	ELKU	BeeCAsia	Halictus (Protohalictus) bucharicus	Animalia	Arthropoda	Insecta	Hymenoptera	Halictidae	Halictinae	Halictus	bucharicus		Blüthgen, 1936	R. Murao	2012	K. Mitai	05/06/2003	KZ	South Kazakhstan Prov.	KZ35	Achisai, alt. 500-700 m, Mts. Karatau, South Kazakhstan Prov.			F	host: Ferula tenuisecta	1
BeeCAsia0010348	BeeCAsia 32	28/5/2017	ELKU	BeeCAsia	Halictus (Protohalictus) bucharicus	Animalia	Arthropoda	Insecta	Hymenoptera	Halictidae	Halictinae	Halictus	bucharicus		Blüthgen, 1936	R. Murao	2012	K. Mitai	05/06/2003	KZ	South Kazakhstan Prov.	KZ35	Achisai, alt. 500-700 m, Mts. Karatau, South Kazakhstan Prov.			F	host: Ferula tenuisecta	1
BeeCAsia0010349	BeeCAsia 32	28/5/2017	ELKU	BeeCAsia	Halictus (Protohalictus) bucharicus	Animalia	Arthropoda	Insecta	Hymenoptera	Halictidae	Halictinae	Halictus	bucharicus		Blüthgen, 1936	R. Murao	2012	K. Mitai	05/06/2003	KZ	South Kazakhstan Prov.	KZ35	Achisai, alt. 500-700 m, Mts. Karatau, South Kazakhstan Prov.			F	host: Ferula tenuisecta	1
BeeCAsia0010350	BeeCAsia 32	28/5/2017	ELKU	BeeCAsia	Halictus (Protohalictus) bucharicus	Animalia	Arthropoda	Insecta	Hymenoptera	Halictidae	Halictinae	Halictus	bucharicus		Blüthgen, 1936	R. Murao	2012	K. Mitai	05/06/2003	KZ	South Kazakhstan Prov.	KZ35	Achisai, alt. 500-700 m, Mts. Karatau, South Kazakhstan Prov.			F	host: Ferula tenuisecta	1
BeeCAsia0010351	BeeCAsia 32	28/5/2017	ELKU	BeeCAsia	Halictus (Protohalictus) bucharicus	Animalia	Arthropoda	Insecta	Hymenoptera	Halictidae	Halictinae	Halictus	bucharicus		Blüthgen, 1936	R. Murao	2012	K. Mitai	05/06/2003	KZ	South Kazakhstan Prov.	KZ35	Achisai, alt. 500-700 m, Mts. Karatau, South Kazakhstan Prov.			F	host: Ferula tenuisecta	1
BeeCAsia0010357	BeeCAsia 32	28/5/2017	ELKU	BeeCAsia	Halictus (Protohalictus) bucharicus	Animalia	Arthropoda	Insecta	Hymenoptera	Halictidae	Halictinae	Halictus	bucharicus		Blüthgen, 1936	R. Murao	2012	K. Mitai	05/06/2003	KZ	South Kazakhstan Prov.	KZ35	Achisai, alt. 500-700 m, Mts. Karatau, South Kazakhstan Prov.			F	host: Ferula tenuisecta	1
BeeCAsia0011659	BeeCAsia 45	28/5/2017	ELKU	BeeCAsia	Lasioglossum (Hemihalictus) croceipes	Animalia	Arthropoda	Insecta	Hymenoptera	Halictidae	Halictinae	Lasioglossum	croceipes		(Morawitz, 1876)	R. Murao	2012	K. Mitai	05/06/2003	KZ	South Kazakhstan Prov.	KZ35	Achisai, alt. 500-700 m, Mts. Karatau, South Kazakhstan Prov.			F	host: Ixioliron tataricum	1
BeeCAsia0011624	BeeCAsia 19	28/5/2017	ELKU	BeeCAsia	Halictus (Mucoreohalictus) mucoreus	Animalia	Arthropoda	Insecta	Hymenoptera	Halictidae	Halictinae	Halictus	mucoreus		Eversmann, 1852	R. Murao	2012	K. Mitai	04/06/2003	KZ	South Kazakhstan Prov.	KZ35	Achisai, alt. 500-700 m, Mts. Karatau, South Kazakhstan Prov.			F		1
BeeCAsia0011662	BeeCAsia 45	28/5/2017	ELKU	BeeCAsia	Lasioglossum (Hemihalictus) croceipes	Animalia	Arthropoda	Insecta	Hymenoptera	Halictidae	Halictinae	Lasioglossum	croceipes		(Morawitz, 1876)	R. Murao	2012	K. Mitai	04/06/2003	KZ	South Kazakhstan Prov.	KZ35	Achisai, alt. 500-700 m, Mts. Karatau, South Kazakhstan Prov.			F		1
BeeCAsia0009634	BeeCAsia 31	28/5/2017	ELKU	BeeCAsia	Halictus (Halictus) brunnescens	Animalia	Arthropoda	Insecta	Hymenoptera	Halictidae	Halictinae	Halictus	brunnescens		(Eversmann, 1852)	R. Murao	2012	K. Mitai	04/06/2003	KZ	South Kazakhstan Prov.	KZ35	Achisai, alt. 500-700 m, Mts. Karatau, South Kazakhstan Prov.			F		1
BeeCAsia0010422	BeeCAsia 39	28/5/2017	ELKU	BeeCAsia	Halictus (Platyhalictus) minor	Animalia	Arthropoda	Insecta	Hymenoptera	Halictidae	Halictinae	Halictus	minor		Morawitz, 1876	R. Murao	2012	K. Mitai	01/06/2003	KZ	South Kazakhstan Prov.	KZ50	Kantagi, alt. 550-700 m, near Kentau, Mts. Karatau, South Kazakhstan Prov.			F		1
BeeCAsia0011677	BeeCAsia 45	28/5/2017	ELKU	BeeCAsia	Lasioglossum (Hemihalictus) croceipes	Animalia	Arthropoda	Insecta	Hymenoptera	Halictidae	Halictinae	Lasioglossum	croceipes		(Morawitz, 1876)	R. Murao	2012	K. Mitai	01/06/2003	KZ	South Kazakhstan Prov.	KZ50	Kantagi, alt. 550-700 m, near Kentau, Mts. Karatau, South Kazakhstan Prov.			F	host: Cirsium sp.	1
BeeCAsia0011678	BeeCAsia 45	28/5/2017	ELKU	BeeCAsia	Lasioglossum (Hemihalictus) croceipes	Animalia	Arthropoda	Insecta	Hymenoptera	Halictidae	Halictinae	Lasioglossum	croceipes		(Morawitz, 1876)	R. Murao	2012	K. Mitai	01/06/2003	KZ	South Kazakhstan Prov.	KZ50	Kantagi, alt. 550-700 m, near Kentau, Mts. Karatau, South Kazakhstan Prov.			F	host: Cirsium sp.	1
BeeCAsia0011679	BeeCAsia 45	28/5/2017	ELKU	BeeCAsia	Lasioglossum (Hemihalictus) croceipes	Animalia	Arthropoda	Insecta	Hymenoptera	Halictidae	Halictinae	Lasioglossum	croceipes		(Morawitz, 1876)	R. Murao	2012	K. Mitai	01/06/2003	KZ	South Kazakhstan Prov.	KZ50	Kantagi, alt. 550-700 m, near Kentau, Mts. Karatau, South Kazakhstan Prov.			F	host: Cirsium sp.	1
BeeCAsia0011680	BeeCAsia 45	28/5/2017	ELKU	BeeCAsia	Lasioglossum (Hemihalictus) croceipes	Animalia	Arthropoda	Insecta	Hymenoptera	Halictidae	Halictinae	Lasioglossum	croceipes		(Morawitz, 1876)	R. Murao	2012	K. Mitai	01/06/2003	KZ	South Kazakhstan Prov.	KZ50	Kantagi, alt. 550-700 m, near Kentau, Mts. Karatau, South Kazakhstan Prov.			F	host: Cirsium sp.	1
BeeCAsia0011681	BeeCAsia 45	28/5/2017	ELKU	BeeCAsia	Lasioglossum (Hemihalictus) croceipes	Animalia	Arthropoda	Insecta	Hymenoptera	Halictidae	Halictinae	Lasioglossum	croceipes		(Morawitz, 1876)	R. Murao	2012	K. Mitai	01/06/2003	KZ	South Kazakhstan Prov.	KZ50	Kantagi, alt. 550-700 m, near Kentau, Mts. Karatau, South Kazakhstan Prov.			F	host: Cirsium sp.	1
BeeCAsia0010420	BeeCAsia 39	28/5/2017	ELKU	BeeCAsia	Halictus (Platyhalictus) minor	Animalia	Arthropoda	Insecta	Hymenoptera	Halictidae	Halictinae	Halictus	minor		Morawitz, 1876	R. Murao	2012	K. Mitai	01/06/2003	KZ	South Kazakhstan Prov.	KZ50	Kantagi, alt. 550-700 m, near Kentau, Mts. Karatau, South Kazakhstan Prov.			F	host: Cirsium sp.	1
BeeCAsia0010172	BeeCAsia 31	28/5/2017	ELKU	BeeCAsia	Halictus (Halictus) brunnescens	Animalia	Arthropoda	Insecta	Hymenoptera	Halictidae	Halictinae	Halictus	brunnescens		(Eversmann, 1852)	R. Murao	2012	R. Murao	03/05/2004	KZ	South Kazakhstan Prov.	KZ64	Sutkent village, North of Kamsomolskoe, South Kazakhstan Prov.			F		1
BeeCAsia0010173	BeeCAsia 31	28/5/2017	ELKU	BeeCAsia	Halictus (Halictus) brunnescens	Animalia	Arthropoda	Insecta	Hymenoptera	Halictidae	Halictinae	Halictus	brunnescens		(Eversmann, 1852)	R. Murao	2012	R. Murao	03/05/2004	KZ	South Kazakhstan Prov.	KZ64	Sutkent village, North of Kamsomolskoe, South Kazakhstan Prov.			F		1
BeeCAsia0010190	BeeCAsia 31	28/5/2017	ELKU	BeeCAsia	Halictus (Halictus) brunnescens	Animalia	Arthropoda	Insecta	Hymenoptera	Halictidae	Halictinae	Halictus	brunnescens		(Eversmann, 1852)	R. Murao	2012	R. Murao	03/05/2004	KZ	South Kazakhstan Prov.	KZ64	Sutkent village, North of Kamsomolskoe, South Kazakhstan Prov.			F		1
BeeCAsia0010194	BeeCAsia 31	28/5/2017	ELKU	BeeCAsia	Halictus (Halictus) brunnescens	Animalia	Arthropoda	Insecta	Hymenoptera	Halictidae	Halictinae	Halictus	brunnescens		(Eversmann, 1852)	R. Murao	2012	R. Murao	03/05/2004	KZ	South Kazakhstan Prov.	KZ64	Sutkent village, North of Kamsomolskoe, South Kazakhstan Prov.			F		1
BeeCAsia0010195	BeeCAsia 31	28/5/2017	ELKU	BeeCAsia	Halictus (Halictus) brunnescens	Animalia	Arthropoda	Insecta	Hymenoptera	Halictidae	Halictinae	Halictus	brunnescens		(Eversmann, 1852)	R. Murao	2012	R. Murao	03/05/2004	KZ	South Kazakhstan Prov.	KZ64	Sutkent village, North of Kamsomolskoe, South Kazakhstan Prov.			F		1
BeeCAsia0010205	BeeCAsia 31	28/5/2017	ELKU	BeeCAsia	Halictus (Halictus) brunnescens	Animalia	Arthropoda	Insecta	Hymenoptera	Halictidae	Halictinae	Halictus	brunnescens		(Eversmann, 1852)	R. Murao	2012	R. Murao	03/05/2004	KZ	South Kazakhstan Prov.	KZ64	Sutkent village, North of Kamsomolskoe, South Kazakhstan Prov.			F		1
BeeCAsia0010206	BeeCAsia 31	28/5/2017	ELKU	BeeCAsia	Halictus (Halictus) brunnescens	Animalia	Arthropoda	Insecta	Hymenoptera	Halictidae	Halictinae	Halictus	brunnescens		(Eversmann, 1852)	R. Murao	2012	R. Murao	03/05/2004	KZ	South Kazakhstan Prov.	KZ64	Sutkent village, North of Kamsomolskoe, South Kazakhstan Prov.			F		1
BeeCAsia0010251	BeeCAsia 39	28/5/2017	ELKU	BeeCAsia	Halictus (Hexataenites) resurgens	Animalia	Arthropoda	Insecta	Hymenoptera	Halictidae	Halictinae	Halictus	resurgens		Nurse, 1903	R. Murao	2012	O. Tadauchi	10/05/2004	KZ	South Kazakhstan Prov.	KZ58	North of Boroldy village, Mts. Karatau, South Kazakhstan Prov.			F		1
BeeCAsia0010290	BeeCAsia 39	28/5/2017	ELKU	BeeCAsia	Halictus (Platyhalictus) minor	Animalia	Arthropoda	Insecta	Hymenoptera	Halictidae	Halictinae	Halictus	minor		Morawitz, 1876	R. Murao	2012	O. Tadauchi	10/05/2004	KZ	South Kazakhstan Prov.	KZ58	North of Boroldy village, Mts. Karatau, South Kazakhstan Prov.			F		1
BeeCAsia0010291	BeeCAsia 39	28/5/2017	ELKU	BeeCAsia	Halictus (Platyhalictus) minor	Animalia	Arthropoda	Insecta	Hymenoptera	Halictidae	Halictinae	Halictus	minor		Morawitz, 1876	R. Murao	2012	O. Tadauchi	10/05/2004	KZ	South Kazakhstan Prov.	KZ58	North of Boroldy village, Mts. Karatau, South Kazakhstan Prov.			F		1
BeeCAsia0010292	BeeCAsia 39	28/5/2017	ELKU	BeeCAsia	Halictus (Platyhalictus) minor	Animalia	Arthropoda	Insecta	Hymenoptera	Halictidae	Halictinae	Halictus	minor		Morawitz, 1876	R. Murao	2012	O. Tadauchi	10/05/2004	KZ	South Kazakhstan Prov.	KZ58	North of Boroldy village, Mts. Karatau, South Kazakhstan Prov.			F		1
BeeCAsia0010293	BeeCAsia 39	28/5/2017	ELKU	BeeCAsia	Halictus (Platyhalictus) minor	Animalia	Arthropoda	Insecta	Hymenoptera	Halictidae	Halictinae	Halictus	minor		Morawitz, 1876	R. Murao	2012	O. Tadauchi	10/05/2004	KZ	South Kazakhstan Prov.	KZ58	North of Boroldy village, Mts. Karatau, South Kazakhstan Prov.			F		1
BeeCAsia0011514	BeeCAsia 21	28/5/2017	ELKU	BeeCAsia	Halictus (Seladonia) seladonius	Animalia	Arthropoda	Insecta	Hymenoptera	Halictidae	Halictinae	Halictus	seladonius		(Fabricius, 1794)	R. Murao	2012	O. Tadauchi	10/05/2004	KZ	South Kazakhstan Prov.	KZ58	North of Boroldy village, Mts. Karatau, South Kazakhstan Prov.			F		1
BeeCAsia0011515	BeeCAsia 21	28/5/2017	ELKU	BeeCAsia	Halictus (Seladonia) seladonius	Animalia	Arthropoda	Insecta	Hymenoptera	Halictidae	Halictinae	Halictus	seladonius		(Fabricius, 1794)	R. Murao	2012	O. Tadauchi	10/05/2004	KZ	South Kazakhstan Prov.	KZ58	North of Boroldy village, Mts. Karatau, South Kazakhstan Prov.			F		1
BeeCAsia0010243	BeeCAsia 32	28/5/2017	ELKU	BeeCAsia	Halictus (Halictus) duplocinctus	Animalia	Arthropoda	Insecta	Hymenoptera	Halictidae	Halictinae	Halictus	duplocinctus		Vachal, 1902	R. Murao	2012	O. Tadauchi	30/04/2004	KZ	South Kazakhstan Prov.	KZ56	Lake Charbarinskoe, Chordara, alt. 180 m, West of Tashkent, South Kazakhstan Prov.			F		1
BeeCAsia0010236	BeeCAsia 32	28/5/2017	ELKU	BeeCAsia	Halictus (Halictus) duplocinctus	Animalia	Arthropoda	Insecta	Hymenoptera	Halictidae	Halictinae	Halictus	duplocinctus		Vachal, 1902	R. Murao	2012	R. Murao	30/04/2004	KZ	South Kazakhstan Prov.	KZ56	Lake Charbarinskoe, Chordara, alt. 180 m, West of Tashkent, South Kazakhstan Prov.			F		1
BeeCAsia0010237	BeeCAsia 32	28/5/2017	ELKU	BeeCAsia	Halictus (Halictus) duplocinctus	Animalia	Arthropoda	Insecta	Hymenoptera	Halictidae	Halictinae	Halictus	duplocinctus		Vachal, 1902	R. Murao	2012	R. Murao	30/04/2004	KZ	South Kazakhstan Prov.	KZ56	Lake Charbarinskoe, Chordara, alt. 180 m, West of Tashkent, South Kazakhstan Prov.			F		1
BeeCAsia0010238	BeeCAsia 32	28/5/2017	ELKU	BeeCAsia	Halictus (Halictus) duplocinctus	Animalia	Arthropoda	Insecta	Hymenoptera	Halictidae	Halictinae	Halictus	duplocinctus		Vachal, 1902	R. Murao	2012	R. Murao	30/04/2004	KZ	South Kazakhstan Prov.	KZ56	Lake Charbarinskoe, Chordara, alt. 180 m, West of Tashkent, South Kazakhstan Prov.			F	host: Tamarix sp.	1
BeeCAsia0010266	BeeCAsia 32	28/5/2017	ELKU	BeeCAsia	Halictus (Argalictus) senilis	Animalia	Arthropoda	Insecta	Hymenoptera	Halictidae	Halictinae	Halictus	senilis		(Eversmann, 1852)	R. Murao	2012	R. Murao	30/04/2004	KZ	South Kazakhstan Prov.	KZ56	Lake Charbarinskoe, Chordara, alt. 180 m, West of Tashkent, South Kazakhstan Prov.			F		1
BeeCAsia0010267	BeeCAsia 32	28/5/2017	ELKU	BeeCAsia	Halictus (Argalictus) senilis	Animalia	Arthropoda	Insecta	Hymenoptera	Halictidae	Halictinae	Halictus	senilis		(Eversmann, 1852)	R. Murao	2012	R. Murao	30/04/2004	KZ	South Kazakhstan Prov.	KZ56	Lake Charbarinskoe, Chordara, alt. 180 m, West of Tashkent, South Kazakhstan Prov.			F		1
BeeCAsia0010268	BeeCAsia 32	28/5/2017	ELKU	BeeCAsia	Halictus (Argalictus) senilis	Animalia	Arthropoda	Insecta	Hymenoptera	Halictidae	Halictinae	Halictus	senilis		(Eversmann, 1852)	R. Murao	2012	R. Murao	30/04/2004	KZ	South Kazakhstan Prov.	KZ56	Lake Charbarinskoe, Chordara, alt. 180 m, West of Tashkent, South Kazakhstan Prov.			F		1
BeeCAsia0010269	BeeCAsia 32	28/5/2017	ELKU	BeeCAsia	Halictus (Argalictus) senilis	Animalia	Arthropoda	Insecta	Hymenoptera	Halictidae	Halictinae	Halictus	senilis		(Eversmann, 1852)	R. Murao	2012	R. Murao	30/04/2004	KZ	South Kazakhstan Prov.	KZ56	Lake Charbarinskoe, Chordara, alt. 180 m, West of Tashkent, South Kazakhstan Prov.			F		1
BeeCAsia0010270	BeeCAsia 32	28/5/2017	ELKU	BeeCAsia	Halictus (Argalictus) senilis	Animalia	Arthropoda	Insecta	Hymenoptera	Halictidae	Halictinae	Halictus	senilis		(Eversmann, 1852)	R. Murao	2012	R. Murao	30/04/2004	KZ	South Kazakhstan Prov.	KZ56	Lake Charbarinskoe, Chordara, alt. 180 m, West of Tashkent, South Kazakhstan Prov.			F		1
BeeCAsia0010271	BeeCAsia 32	28/5/2017	ELKU	BeeCAsia	Halictus (Argalictus) senilis	Animalia	Arthropoda	Insecta	Hymenoptera	Halictidae	Halictinae	Halictus	senilis		(Eversmann, 1852)	R. Murao	2012	R. Murao	30/04/2004	KZ	South Kazakhstan Prov.	KZ56	Lake Charbarinskoe, Chordara, alt. 180 m, West of Tashkent, South Kazakhstan Prov.			F		1
BeeCAsia0010272	BeeCAsia 32	28/5/2017	ELKU	BeeCAsia	Halictus (Argalictus) senilis	Animalia	Arthropoda	Insecta	Hymenoptera	Halictidae	Halictinae	Halictus	senilis		(Eversmann, 1852)	R. Murao	2012	R. Murao	30/04/2004	KZ	South Kazakhstan Prov.	KZ56	Lake Charbarinskoe, Chordara, alt. 180 m, West of Tashkent, South Kazakhstan Prov.			F		1
BeeCAsia0010273	BeeCAsia 32	28/5/2017	ELKU	BeeCAsia	Halictus (Argalictus) senilis	Animalia	Arthropoda	Insecta	Hymenoptera	Halictidae	Halictinae	Halictus	senilis		(Eversmann, 1852)	R. Murao	2012	R. Murao	30/04/2004	KZ	South Kazakhstan Prov.	KZ56	Lake Charbarinskoe, Chordara, alt. 180 m, West of Tashkent, South Kazakhstan Prov.			F		1
BeeCAsia0010274	BeeCAsia 32	28/5/2017	ELKU	BeeCAsia	Halictus (Argalictus) senilis	Animalia	Arthropoda	Insecta	Hymenoptera	Halictidae	Halictinae	Halictus	senilis		(Eversmann, 1852)	R. Murao	2012	R. Murao	30/04/2004	KZ	South Kazakhstan Prov.	KZ56	Lake Charbarinskoe, Chordara, alt. 180 m, West of Tashkent, South Kazakhstan Prov.			F		1
BeeCAsia0010253	BeeCAsia 39	28/5/2017	ELKU	BeeCAsia	Halictus (Hexataenites) resurgens	Animalia	Arthropoda	Insecta	Hymenoptera	Halictidae	Halictinae	Halictus	resurgens		Nurse, 1903	R. Murao	2012	O. Tadauchi	05/09/2002	KZ	South Kazakhstan Prov.	KZ66	Ulken-Kaindy, Jabagly, alt. 1090-2000 m, South Kazakhstan Prov.			F	host: Asteraceae gen. et. sp.	1
BeeCAsia0010313	BeeCAsia 32	28/5/2017	ELKU	BeeCAsia	Halictus (Monilapis) compressus transvolgensis	Animalia	Arthropoda	Insecta	Hymenoptera	Halictidae	Halictinae	Halictus	compressus	transvolgensis	Pesenko, 1985	R. Murao	2012	O. Tadauchi	05/09/2002	KZ	South Kazakhstan Prov.	KZ66	Ulken-Kaindy, Jabagly, alt. 1090-2000 m, South Kazakhstan Prov.			F	host: Asteraceae gen. et. sp.	1
BeeCAsia0010296	BeeCAsia 39	28/5/2017	ELKU	BeeCAsia	Halictus (Platyhalictus) minor	Animalia	Arthropoda	Insecta	Hymenoptera	Halictidae	Halictinae	Halictus	minor		Morawitz, 1876	R. Murao	2012	O. Tadauchi	05/09/2002	KZ	South Kazakhstan Prov.	KZ66	Ulken-Kaindy, Jabagly, alt. 1090-2000 m, South Kazakhstan Prov.			F	host: Aster canescens	1
BeeCAsia0010310	BeeCAsia 32	28/5/2017	ELKU	BeeCAsia	Halictus (Monilapis) compressus transvolgensis	Animalia	Arthropoda	Insecta	Hymenoptera	Halictidae	Halictinae	Halictus	compressus	transvolgensis	Pesenko, 1985	R. Murao	2012	O. Tadauchi	05/09/2002	KZ	South Kazakhstan Prov.	KZ66	Ulken-Kaindy, Jabagly, alt. 1090-2000 m, South Kazakhstan Prov.			F	host: Aster canescens	1
BeeCAsia0010311	BeeCAsia 32	28/5/2017	ELKU	BeeCAsia	Halictus (Monilapis) compressus transvolgensis	Animalia	Arthropoda	Insecta	Hymenoptera	Halictidae	Halictinae	Halictus	compressus	transvolgensis	Pesenko, 1985	R. Murao	2012	O. Tadauchi	05/09/2002	KZ	South Kazakhstan Prov.	KZ66	Ulken-Kaindy, Jabagly, alt. 1090-2000 m, South Kazakhstan Prov.			F	host: Aster canescens	1
BeeCAsia0010312	BeeCAsia 32	28/5/2017	ELKU	BeeCAsia	Halictus (Monilapis) compressus transvolgensis	Animalia	Arthropoda	Insecta	Hymenoptera	Halictidae	Halictinae	Halictus	compressus	transvolgensis	Pesenko, 1985	R. Murao	2012	O. Tadauchi	05/09/2002	KZ	South Kazakhstan Prov.	KZ66	Ulken-Kaindy, Jabagly, alt. 1090-2000 m, South Kazakhstan Prov.			F	host: Aster canescens	1
BeeCAsia0010314	BeeCAsia 32	28/5/2017	ELKU	BeeCAsia	Halictus (Monilapis) compressus transvolgensis	Animalia	Arthropoda	Insecta	Hymenoptera	Halictidae	Halictinae	Halictus	compressus	transvolgensis	Pesenko, 1985	R. Murao	2012	O. Tadauchi	05/09/2002	KZ	South Kazakhstan Prov.	KZ66	Ulken-Kaindy, Jabagly, alt. 1090-2000 m, South Kazakhstan Prov.			F	host: Aster canescens	1
BeeCAsia0010315	BeeCAsia 32	28/5/2017	ELKU	BeeCAsia	Halictus (Monilapis) compressus transvolgensis	Animalia	Arthropoda	Insecta	Hymenoptera	Halictidae	Halictinae	Halictus	compressus	transvolgensis	Pesenko, 1985	R. Murao	2012	O. Tadauchi	05/09/2002	KZ	South Kazakhstan Prov.	KZ66	Ulken-Kaindy, Jabagly, alt. 1090-2000 m, South Kazakhstan Prov.			F	host: Aster canescens	1
BeeCAsia0010316	BeeCAsia 32	28/5/2017	ELKU	BeeCAsia	Halictus (Monilapis) compressus transvolgensis	Animalia	Arthropoda	Insecta	Hymenoptera	Halictidae	Halictinae	Halictus	compressus	transvolgensis	Pesenko, 1985	R. Murao	2012	O. Tadauchi	05/09/2002	KZ	South Kazakhstan Prov.	KZ66	Ulken-Kaindy, Jabagly, alt. 1090-2000 m, South Kazakhstan Prov.			F	host: Aster canescens	1
BeeCAsia0010317	BeeCAsia 32	28/5/2017	ELKU	BeeCAsia	Halictus (Monilapis) compressus transvolgensis	Animalia	Arthropoda	Insecta	Hymenoptera	Halictidae	Halictinae	Halictus	compressus	transvolgensis	Pesenko, 1985	R. Murao	2012	O. Tadauchi	05/09/2002	KZ	South Kazakhstan Prov.	KZ66	Ulken-Kaindy, Jabagly, alt. 1090-2000 m, South Kazakhstan Prov.			F	host: Aster canescens	1
BeeCAsia0010318	BeeCAsia 32	28/5/2017	ELKU	BeeCAsia	Halictus (Monilapis) compressus transvolgensis	Animalia	Arthropoda	Insecta	Hymenoptera	Halictidae	Halictinae	Halictus	compressus	transvolgensis	Pesenko, 1985	R. Murao	2012	O. Tadauchi	05/09/2002	KZ	South Kazakhstan Prov.	KZ66	Ulken-Kaindy, Jabagly, alt. 1090-2000 m, South Kazakhstan Prov.			F	host: Aster canescens	1
BeeCAsia0010475	BeeCAsia 32	28/5/2017	ELKU	BeeCAsia	Halictus (Argalictus) senilis	Animalia	Arthropoda	Insecta	Hymenoptera	Halictidae	Halictinae	Halictus	senilis		(Eversmann, 1852)	R. Murao	2012	R. Murao	03/05/2004	KZ	South Kazakhstan Prov.	KZ46	Hot spring, West of Kamsomolskoe, Kyzylkum desert, South Kazakhstan Prov.			F		1
BeeCAsia0010476	BeeCAsia 32	28/5/2017	ELKU	BeeCAsia	Halictus (Argalictus) senilis	Animalia	Arthropoda	Insecta	Hymenoptera	Halictidae	Halictinae	Halictus	senilis		(Eversmann, 1852)	R. Murao	2012	R. Murao	03/05/2004	KZ	South Kazakhstan Prov.	KZ46	Hot spring, West of Kamsomolskoe, Kyzylkum desert, South Kazakhstan Prov.			F		1
BeeCAsia0010477	BeeCAsia 32	28/5/2017	ELKU	BeeCAsia	Halictus (Argalictus) senilis	Animalia	Arthropoda	Insecta	Hymenoptera	Halictidae	Halictinae	Halictus	senilis		(Eversmann, 1852)	R. Murao	2012	R. Murao	03/05/2004	KZ	South Kazakhstan Prov.	KZ46	Hot spring, West of Kamsomolskoe, Kyzylkum desert, South Kazakhstan Prov.			F		1
BeeCAsia0010352	BeeCAsia 32	28/5/2017	ELKU	BeeCAsia	Halictus (Protohalictus) bucharicus	Animalia	Arthropoda	Insecta	Hymenoptera	Halictidae	Halictinae	Halictus	bucharicus		Blüthgen, 1936	R. Murao	2012	K. Mitai	17/06/2003	KZ	South Kazakhstan Prov.	KZ51	Karaalma alt. 1210 m, Near Jabagly, South Kazakhstan Prov.			F		1
BeeCAsia0010358	BeeCAsia 32	28/5/2017	ELKU	BeeCAsia	Halictus (Monilapis) compressus transvolgensis	Animalia	Arthropoda	Insecta	Hymenoptera	Halictidae	Halictinae	Halictus	compressus	transvolgensis	Pesenko, 1985	R. Murao	2012	K. Mitai	17/06/2003	KZ	South Kazakhstan Prov.	KZ51	Karaalma alt. 1210 m, Near Jabagly, South Kazakhstan Prov.			F	host: Trifolium repens	1
BeeCAsia0010360	BeeCAsia 32	28/5/2017	ELKU	BeeCAsia	Halictus (Monilapis) compressus transvolgensis	Animalia	Arthropoda	Insecta	Hymenoptera	Halictidae	Halictinae	Halictus	compressus	transvolgensis	Pesenko, 1985	R. Murao	2012	K. Mitai	17/06/2003	KZ	South Kazakhstan Prov.	KZ51	Karaalma alt. 1210 m, Near Jabagly, South Kazakhstan Prov.			F	host: Trifolium repens	1
BeeCAsia0010361	BeeCAsia 32	28/5/2017	ELKU	BeeCAsia	Halictus (Monilapis) compressus transvolgensis	Animalia	Arthropoda	Insecta	Hymenoptera	Halictidae	Halictinae	Halictus	compressus	transvolgensis	Pesenko, 1985	R. Murao	2012	K. Mitai	17/06/2003	KZ	South Kazakhstan Prov.	KZ51	Karaalma alt. 1210 m, Near Jabagly, South Kazakhstan Prov.			F	host: Trifolium repens	1
BeeCAsia0010362	BeeCAsia 32	28/5/2017	ELKU	BeeCAsia	Halictus (Monilapis) compressus transvolgensis	Animalia	Arthropoda	Insecta	Hymenoptera	Halictidae	Halictinae	Halictus	compressus	transvolgensis	Pesenko, 1985	R. Murao	2012	K. Mitai	17/06/2003	KZ	South Kazakhstan Prov.	KZ51	Karaalma alt. 1210 m, Near Jabagly, South Kazakhstan Prov.			F	host: Trifolium repens	1
BeeCAsia0010363	BeeCAsia 32	28/5/2017	ELKU	BeeCAsia	Halictus (Monilapis) compressus transvolgensis	Animalia	Arthropoda	Insecta	Hymenoptera	Halictidae	Halictinae	Halictus	compressus	transvolgensis	Pesenko, 1985	R. Murao	2012	K. Mitai	17/06/2003	KZ	South Kazakhstan Prov.	KZ51	Karaalma alt. 1210 m, Near Jabagly, South Kazakhstan Prov.			F	host: Trifolium repens	1
BeeCAsia0010364	BeeCAsia 32	28/5/2017	ELKU	BeeCAsia	Halictus (Monilapis) compressus transvolgensis	Animalia	Arthropoda	Insecta	Hymenoptera	Halictidae	Halictinae	Halictus	compressus	transvolgensis	Pesenko, 1985	R. Murao	2012	K. Mitai	17/06/2003	KZ	South Kazakhstan Prov.	KZ51	Karaalma alt. 1210 m, Near Jabagly, South Kazakhstan Prov.			F		1
BeeCAsia0010365	BeeCAsia 32	28/5/2017	ELKU	BeeCAsia	Halictus (Monilapis) compressus transvolgensis	Animalia	Arthropoda	Insecta	Hymenoptera	Halictidae	Halictinae	Halictus	compressus	transvolgensis	Pesenko, 1985	R. Murao	2012	K. Mitai	17/06/2003	KZ	South Kazakhstan Prov.	KZ51	Karaalma alt. 1210 m, Near Jabagly, South Kazakhstan Prov.			F		1
BeeCAsia0010366	BeeCAsia 32	28/5/2017	ELKU	BeeCAsia	Halictus (Monilapis) compressus transvolgensis	Animalia	Arthropoda	Insecta	Hymenoptera	Halictidae	Halictinae	Halictus	compressus	transvolgensis	Pesenko, 1985	R. Murao	2012	K. Mitai	17/06/2003	KZ	South Kazakhstan Prov.	KZ51	Karaalma alt. 1210 m, Near Jabagly, South Kazakhstan Prov.			F		1
BeeCAsia0010367	BeeCAsia 32	28/5/2017	ELKU	BeeCAsia	Halictus (Monilapis) compressus transvolgensis	Animalia	Arthropoda	Insecta	Hymenoptera	Halictidae	Halictinae	Halictus	compressus	transvolgensis	Pesenko, 1985	R. Murao	2012	K. Mitai	17/06/2003	KZ	South Kazakhstan Prov.	KZ51	Karaalma alt. 1210 m, Near Jabagly, South Kazakhstan Prov.			F		1
BeeCAsia0010375	BeeCAsia 32	28/5/2017	ELKU	BeeCAsia	Halictus (Monilapis) compressus transvolgensis	Animalia	Arthropoda	Insecta	Hymenoptera	Halictidae	Halictinae	Halictus	compressus	transvolgensis	Pesenko, 1985	R. Murao	2012	K. Mitai	17/06/2003	KZ	South Kazakhstan Prov.	KZ51	Karaalma alt. 1210 m, Near Jabagly, South Kazakhstan Prov.			F	host: Trifolium repens	1
BeeCAsia0010380	BeeCAsia 32	28/5/2017	ELKU	BeeCAsia	Halictus (Monilapis) compressus transvolgensis	Animalia	Arthropoda	Insecta	Hymenoptera	Halictidae	Halictinae	Halictus	compressus	transvolgensis	Pesenko, 1985	R. Murao	2012	K. Mitai	17/06/2003	KZ	South Kazakhstan Prov.	KZ51	Karaalma alt. 1210 m, Near Jabagly, South Kazakhstan Prov.			F	host: Trifolium repens	1
BeeCAsia0010467	BeeCAsia 32	28/5/2017	ELKU	BeeCAsia	Halictus (Tytthalictus) palustris	Animalia	Arthropoda	Insecta	Hymenoptera	Halictidae	Halictinae	Halictus	palustris		Morawitz, 1876	R. Murao	2012	K. Mitai	17/06/2003	KZ	South Kazakhstan Prov.	KZ51	Karaalma alt. 1210 m, Near Jabagly, South Kazakhstan Prov.			F		1
BeeCAsia0010478	BeeCAsia 32	28/5/2017	ELKU	BeeCAsia	Halictus (Argalictus) senilis	Animalia	Arthropoda	Insecta	Hymenoptera	Halictidae	Halictinae	Halictus	senilis		(Eversmann, 1852)	R. Murao	2012	O. Tadauchi	04/05/2004	KZ	South Kazakhstan Prov.	KZ60	Plain North of Karamola, Kyzylkum desert, South Kazakhstan Prov.			F		1
BeeCAsia0010242	BeeCAsia 32	28/5/2017	ELKU	BeeCAsia	Halictus (Halictus) duplocinctus	Animalia	Arthropoda	Insecta	Hymenoptera	Halictidae	Halictinae	Halictus	duplocinctus		Vachal, 1902	R. Murao	2012	R. Murao	04/05/2004	KZ	South Kazakhstan Prov.	KZ60	Plain North of Karamola, Kyzylkum desert, South Kazakhstan Prov.			F		1
BeeCAsia0010369	BeeCAsia 32	28/5/2017	ELKU	BeeCAsia	Halictus (Monilapis) compressus transvolgensis	Animalia	Arthropoda	Insecta	Hymenoptera	Halictidae	Halictinae	Halictus	compressus	transvolgensis	Pesenko, 1985	R. Murao	2012	K. Mitai	16/06/2003	KZ	South Kazakhstan Prov.	KZ38	Aksu Valley, Jabagly, alt. 130-560 m, South Kazakhstan Prov.			F	host: Trifolium repens	1
BeeCAsia0010370	BeeCAsia 32	28/5/2017	ELKU	BeeCAsia	Halictus (Monilapis) compressus transvolgensis	Animalia	Arthropoda	Insecta	Hymenoptera	Halictidae	Halictinae	Halictus	compressus	transvolgensis	Pesenko, 1985	R. Murao	2012	K. Mitai	16/06/2003	KZ	South Kazakhstan Prov.	KZ38	Aksu Valley, Jabagly, alt. 130-560 m, South Kazakhstan Prov.			F	host: Trifolium repens	1
BeeCAsia0010371	BeeCAsia 32	28/5/2017	ELKU	BeeCAsia	Halictus (Monilapis) compressus transvolgensis	Animalia	Arthropoda	Insecta	Hymenoptera	Halictidae	Halictinae	Halictus	compressus	transvolgensis	Pesenko, 1985	R. Murao	2012	K. Mitai	16/06/2003	KZ	South Kazakhstan Prov.	KZ38	Aksu Valley, Jabagly, alt. 130-560 m, South Kazakhstan Prov.			F		1
BeeCAsia0010372	BeeCAsia 32	28/5/2017	ELKU	BeeCAsia	Halictus (Monilapis) compressus transvolgensis	Animalia	Arthropoda	Insecta	Hymenoptera	Halictidae	Halictinae	Halictus	compressus	transvolgensis	Pesenko, 1985	R. Murao	2012	K. Mitai	16/06/2003	KZ	South Kazakhstan Prov.	KZ38	Aksu Valley, Jabagly, alt. 130-560 m, South Kazakhstan Prov.			F	host: Trifolium repens	1
BeeCAsia0010373	BeeCAsia 32	28/5/2017	ELKU	BeeCAsia	Halictus (Monilapis) compressus transvolgensis	Animalia	Arthropoda	Insecta	Hymenoptera	Halictidae	Halictinae	Halictus	compressus	transvolgensis	Pesenko, 1985	R. Murao	2012	K. Mitai	16/06/2003	KZ	South Kazakhstan Prov.	KZ38	Aksu Valley, Jabagly, alt. 130-560 m, South Kazakhstan Prov.			F		1
BeeCAsia0010374	BeeCAsia 32	28/5/2017	ELKU	BeeCAsia	Halictus (Monilapis) compressus transvolgensis	Animalia	Arthropoda	Insecta	Hymenoptera	Halictidae	Halictinae	Halictus	compressus	transvolgensis	Pesenko, 1985	R. Murao	2012	K. Mitai	16/06/2003	KZ	South Kazakhstan Prov.	KZ38	Aksu Valley, Jabagly, alt. 130-560 m, South Kazakhstan Prov.			F		1
BeeCAsia0010471	BeeCAsia 32	28/5/2017	ELKU	BeeCAsia	Halictus (Tytthalictus) palustris	Animalia	Arthropoda	Insecta	Hymenoptera	Halictidae	Halictinae	Halictus	palustris		Morawitz, 1876	R. Murao	2012	K. Mitai	16/06/2003	KZ	South Kazakhstan Prov.	KZ38	Aksu Valley, Jabagly, alt. 130-560 m, South Kazakhstan Prov.			F		1
BeeCAsia0011466	BeeCAsia 20	28/5/2017	ELKU	BeeCAsia	Halictus (Seladonia) pjalmensis pjalmensis	Animalia	Arthropoda	Insecta	Hymenoptera	Halictidae	Halictinae	Halictus	pjalmensis	pjalmensis	Strand, 1909	R. Murao	2012	K. Mitai	16/06/2003	KZ	South Kazakhstan Prov.	KZ38	Aksu Valley, Jabagly, alt. 130-560 m, South Kazakhstan Prov.			F		1
BeeCAsia0011467	BeeCAsia 20	28/5/2017	ELKU	BeeCAsia	Halictus (Seladonia) pjalmensis pjalmensis	Animalia	Arthropoda	Insecta	Hymenoptera	Halictidae	Halictinae	Halictus	pjalmensis	pjalmensis	Strand, 1909	R. Murao	2012	K. Mitai	16/06/2003	KZ	South Kazakhstan Prov.	KZ38	Aksu Valley, Jabagly, alt. 130-560 m, South Kazakhstan Prov.			F		1
BeeCAsia0011477	BeeCAsia 20	28/5/2017	ELKU	BeeCAsia	Halictus (Seladonia) pjalmensis pjalmensis	Animalia	Arthropoda	Insecta	Hymenoptera	Halictidae	Halictinae	Halictus	pjalmensis	pjalmensis	Strand, 1909	R. Murao	2012	O. Tadauchi	30/05/2003	KZ	South Kazakhstan Prov.	KZ44	East of Chimkent, alt. 570m, South Kazakhstan Prov.			F		1
BeeCAsia0009702	BeeCAsia 31	28/5/2017	ELKU	BeeCAsia	Halictus (Halictus) brunnescens	Animalia	Arthropoda	Insecta	Hymenoptera	Halictidae	Halictinae	Halictus	brunnescens		(Eversmann, 1852)	R. Murao	2012	O. Tadauchi	30/05/2003	KZ	South Kazakhstan Prov.	KZ44	East of Chimkent, alt. 570m, South Kazakhstan Prov.			F		1
BeeCAsia0009703	BeeCAsia 31	28/5/2017	ELKU	BeeCAsia	Halictus (Halictus) brunnescens	Animalia	Arthropoda	Insecta	Hymenoptera	Halictidae	Halictinae	Halictus	brunnescens		(Eversmann, 1852)	R. Murao	2012	O. Tadauchi	30/05/2003	KZ	South Kazakhstan Prov.	KZ44	East of Chimkent, alt. 570m, South Kazakhstan Prov.			F		1
BeeCAsia0010377	BeeCAsia 32	28/5/2017	ELKU	BeeCAsia	Halictus (Monilapis) compressus transvolgensis	Animalia	Arthropoda	Insecta	Hymenoptera	Halictidae	Halictinae	Halictus	compressus	transvolgensis	Pesenko, 1985	R. Murao	2012	K. Mitai	30/05/2003	KZ	South Kazakhstan Prov.	KZ44	East of Chimkent, alt. 570m, South Kazakhstan Prov.			F	host: Brassica juncea	1
BeeCAsia0010378	BeeCAsia 32	28/5/2017	ELKU	BeeCAsia	Halictus (Monilapis) compressus transvolgensis	Animalia	Arthropoda	Insecta	Hymenoptera	Halictidae	Halictinae	Halictus	compressus	transvolgensis	Pesenko, 1985	R. Murao	2012	K. Mitai	30/05/2003	KZ	South Kazakhstan Prov.	KZ44	East of Chimkent, alt. 570m, South Kazakhstan Prov.			F	host: Brassica juncea	1
BeeCAsia0011206	BeeCAsia 19	28/5/2017	ELKU	BeeCAsia	Halictus (Mucoreohalictus) mucidus	Animalia	Arthropoda	Insecta	Hymenoptera	Halictidae	Halictinae	Halictus	mucidus		Blüthgen, 1923	R. Murao	2012	O. Tadauchi	30/05/2003	KZ	South Kazakhstan Prov.	KZ59	North of Chimkent, alt. 400 m, South Kazakhstan Prov.			F		1
BeeCAsia0010473	BeeCAsia 32	28/5/2017	ELKU	BeeCAsia	Halictus (Argalictus) senilis	Animalia	Arthropoda	Insecta	Hymenoptera	Halictidae	Halictinae	Halictus	senilis		(Eversmann, 1852)	R. Murao	2012	K. Mitai	30/05/2003	KZ	South Kazakhstan Prov.	KZ59	North of Chimkent, alt. 400 m, South Kazakhstan Prov.			F		1
BeeCAsia0009596	BeeCAsia 31	28/5/2017	ELKU	BeeCAsia	Halictus (Halictus) brunnescens	Animalia	Arthropoda	Insecta	Hymenoptera	Halictidae	Halictinae	Halictus	brunnescens		(Eversmann, 1852)	R. Murao	2012	K. Mitai	08/06/2003	KZ	South Kazakhstan Prov.	KZ63	Shayan-Birlik, South Kazakhstan Prov.			F		1
BeeCAsia0010254	BeeCAsia 39	28/5/2017	ELKU	BeeCAsia	Halictus (Hexataenites) resurgens	Animalia	Arthropoda	Insecta	Hymenoptera	Halictidae	Halictinae	Halictus	resurgens		Nurse, 1903	R. Murao	2012	K. Mitai	13/06/2003	KZ	South Kazakhstan Prov.	KZ42	Daubaba, alt. 700-800 m, South Kazakhstan Prov.			F		1
BeeCAsia0010295	BeeCAsia 39	28/5/2017	ELKU	BeeCAsia	Halictus (Platyhalictus) minor	Animalia	Arthropoda	Insecta	Hymenoptera	Halictidae	Halictinae	Halictus	minor		Morawitz, 1876	R. Murao	2012	K. Mitai	09/06/2003	KZ	South Kazakhstan Prov.	KZ39	Baijansai, alt. 660-1030 m, Mts. Karatau, South Kazakhstan Prov.			F	host: Cruciferae gen. et sp.	1
BeeCAsia0010288	BeeCAsia 39	28/5/2017	ELKU	BeeCAsia	Halictus (Platyhalictus) minor	Animalia	Arthropoda	Insecta	Hymenoptera	Halictidae	Halictinae	Halictus	minor		Morawitz, 1876	R. Murao	2012	O. Tadauchi	09/06/2003	KZ	South Kazakhstan Prov.	KZ39	Baijansai, alt. 660-1030 m, Mts. Karatau, South Kazakhstan Prov.			F		1
BeeCAsia0010283	BeeCAsia 32	28/5/2017	ELKU	BeeCAsia	Halictus (Argalictus) senilis	Animalia	Arthropoda	Insecta	Hymenoptera	Halictidae	Halictinae	Halictus	senilis		(Eversmann, 1852)	R. Murao	2012	O. Tadauchi	02/05/2004	KZ	South Kazakhstan Prov.	KZ55	Kyzylkum desert, South Kazakhstan Prov.			F		1
BeeCAsia0010284	BeeCAsia 32	28/5/2017	ELKU	BeeCAsia	Halictus (Argalictus) senilis	Animalia	Arthropoda	Insecta	Hymenoptera	Halictidae	Halictinae	Halictus	senilis		(Eversmann, 1852)	R. Murao	2012	O. Tadauchi	02/05/2004	KZ	South Kazakhstan Prov.	KZ55	Kyzylkum desert, South Kazakhstan Prov.			F		1
BeeCAsia0010285	BeeCAsia 32	28/5/2017	ELKU	BeeCAsia	Halictus (Argalictus) senilis	Animalia	Arthropoda	Insecta	Hymenoptera	Halictidae	Halictinae	Halictus	senilis		(Eversmann, 1852)	R. Murao	2012	O. Tadauchi	02/05/2004	KZ	South Kazakhstan Prov.	KZ55	Kyzylkum desert, South Kazakhstan Prov.			F		1
BeeCAsia0010280	BeeCAsia 32	28/5/2017	ELKU	BeeCAsia	Halictus (Argalictus) senilis	Animalia	Arthropoda	Insecta	Hymenoptera	Halictidae	Halictinae	Halictus	senilis		(Eversmann, 1852)	R. Murao	2012	O. Tadauchi	01/05/2004	KZ	South Kazakhstan Prov.	KZ68	West of Kamsomolskoe, Kyzylkum desert, South Kazakhstan Prov.			F		1
BeeCAsia0010281	BeeCAsia 32	28/5/2017	ELKU	BeeCAsia	Halictus (Argalictus) senilis	Animalia	Arthropoda	Insecta	Hymenoptera	Halictidae	Halictinae	Halictus	senilis		(Eversmann, 1852)	R. Murao	2012	O. Tadauchi	01/05/2004	KZ	South Kazakhstan Prov.	KZ68	West of Kamsomolskoe, Kyzylkum desert, South Kazakhstan Prov.			F		1
BeeCAsia0010282	BeeCAsia 32	28/5/2017	ELKU	BeeCAsia	Halictus (Argalictus) senilis	Animalia	Arthropoda	Insecta	Hymenoptera	Halictidae	Halictinae	Halictus	senilis		(Eversmann, 1852)	R. Murao	2012	O. Tadauchi	01/05/2004	KZ	South Kazakhstan Prov.	KZ68	West of Kamsomolskoe, Kyzylkum desert, South Kazakhstan Prov.			F		1
BeeCAsia0010431	BeeCAsia 39	28/5/2017	ELKU	BeeCAsia	Halictus (Platyhalictus) minor	Animalia	Arthropoda	Insecta	Hymenoptera	Halictidae	Halictinae	Halictus	minor		Morawitz, 1876	R. Murao	2012	R. Murao	02/05/2004	KZ	South Kazakhstan Prov.	KZ68	West of Kamsomolskoe, Kyzylkum desert, South Kazakhstan Prov.			F		1
BeeCAsia0010278	BeeCAsia 32	28/5/2017	ELKU	BeeCAsia	Halictus (Argalictus) senilis	Animalia	Arthropoda	Insecta	Hymenoptera	Halictidae	Halictinae	Halictus	senilis		(Eversmann, 1852)	R. Murao	2012	R. Murao	02/05/2004	KZ	South Kazakhstan Prov.	KZ68	West of Kamsomolskoe, Kyzylkum desert, South Kazakhstan Prov.			F		1
BeeCAsia0010279	BeeCAsia 32	28/5/2017	ELKU	BeeCAsia	Halictus (Argalictus) senilis	Animalia	Arthropoda	Insecta	Hymenoptera	Halictidae	Halictinae	Halictus	senilis		(Eversmann, 1852)	R. Murao	2012	R. Murao	02/05/2004	KZ	South Kazakhstan Prov.	KZ68	West of Kamsomolskoe, Kyzylkum desert, South Kazakhstan Prov.			F		1
BeeCAsia0011831	BeeCAsia 19	28/5/2017	ELKU	BeeCAsia	Halictus (Mucoreohalictus) mucidus	Animalia	Arthropoda	Insecta	Hymenoptera	Halictidae	Halictinae	Halictus	mucidus		Blüthgen, 1923	R. Murao	2012	R. Murao	02/05/2004	KZ	South Kazakhstan Prov.	KZ68	West of Kamsomolskoe, Kyzylkum desert, South Kazakhstan Prov.			F		1
BeeCAsia0011846	BeeCAsia 19	28/5/2017	ELKU	BeeCAsia	Halictus (Mucoreohalictus) mucidus	Animalia	Arthropoda	Insecta	Hymenoptera	Halictidae	Halictinae	Halictus	mucidus		Blüthgen, 1923	R. Murao	2012	R. Murao	02/05/2004	KZ	South Kazakhstan Prov.	KZ68	West of Kamsomolskoe, Kyzylkum desert, South Kazakhstan Prov.			F		1
BeeCAsia0011847	BeeCAsia 19	28/5/2017	ELKU	BeeCAsia	Halictus (Mucoreohalictus) mucidus	Animalia	Arthropoda	Insecta	Hymenoptera	Halictidae	Halictinae	Halictus	mucidus		Blüthgen, 1923	R. Murao	2012	R. Murao	02/05/2004	KZ	South Kazakhstan Prov.	KZ68	West of Kamsomolskoe, Kyzylkum desert, South Kazakhstan Prov.			F		1
BeeCAsia0011848	BeeCAsia 19	28/5/2017	ELKU	BeeCAsia	Halictus (Mucoreohalictus) mucidus	Animalia	Arthropoda	Insecta	Hymenoptera	Halictidae	Halictinae	Halictus	mucidus		Blüthgen, 1923	R. Murao	2012	R. Murao	02/05/2004	KZ	South Kazakhstan Prov.	KZ68	West of Kamsomolskoe, Kyzylkum desert, South Kazakhstan Prov.			F		1
BeeCAsia0010103	BeeCAsia 32	28/5/2017	ELKU	BeeCAsia	Halictus (Monilapis) compressus transvolgensis	Animalia	Arthropoda	Insecta	Hymenoptera	Halictidae	Halictinae	Halictus	compressus	transvolgensis	Pesenko, 1985	R. Murao	2012	O. Tadauchi	17/06/2003	KZ	South Kazakhstan Prov.	KZ51	Karaalma alt. 1210 m, Near Jabagly, South Kazakhstan Prov.			F		1
BeeCAsia0010104	BeeCAsia 32	28/5/2017	ELKU	BeeCAsia	Halictus (Monilapis) compressus transvolgensis	Animalia	Arthropoda	Insecta	Hymenoptera	Halictidae	Halictinae	Halictus	compressus	transvolgensis	Pesenko, 1985	R. Murao	2012	O. Tadauchi	17/06/2003	KZ	South Kazakhstan Prov.	KZ51	Karaalma alt. 1210 m, Near Jabagly, South Kazakhstan Prov.			F		1
BeeCAsia0010105	BeeCAsia 32	28/5/2017	ELKU	BeeCAsia	Halictus (Monilapis) compressus transvolgensis	Animalia	Arthropoda	Insecta	Hymenoptera	Halictidae	Halictinae	Halictus	compressus	transvolgensis	Pesenko, 1985	R. Murao	2012	O. Tadauchi	17/06/2003	KZ	South Kazakhstan Prov.	KZ51	Karaalma alt. 1210 m, Near Jabagly, South Kazakhstan Prov.			F		1
BeeCAsia0010106	BeeCAsia 32	28/5/2017	ELKU	BeeCAsia	Halictus (Monilapis) compressus transvolgensis	Animalia	Arthropoda	Insecta	Hymenoptera	Halictidae	Halictinae	Halictus	compressus	transvolgensis	Pesenko, 1985	R. Murao	2012	O. Tadauchi	17/06/2003	KZ	South Kazakhstan Prov.	KZ51	Karaalma alt. 1210 m, Near Jabagly, South Kazakhstan Prov.			F		1
BeeCAsia0010107	BeeCAsia 32	28/5/2017	ELKU	BeeCAsia	Halictus (Monilapis) compressus transvolgensis	Animalia	Arthropoda	Insecta	Hymenoptera	Halictidae	Halictinae	Halictus	compressus	transvolgensis	Pesenko, 1985	R. Murao	2012	O. Tadauchi	17/06/2003	KZ	South Kazakhstan Prov.	KZ51	Karaalma alt. 1210 m, Near Jabagly, South Kazakhstan Prov.			F		1
BeeCAsia0010263	BeeCAsia 39	28/5/2017	ELKU	BeeCAsia	Halictus (Hexataenites) resurgens	Animalia	Arthropoda	Insecta	Hymenoptera	Halictidae	Halictinae	Halictus	resurgens		Nurse, 1903	R. Murao	2012	O. Tadauchi	07/06/2003	KZ	South Kazakhstan Prov.	KZ47	Janatas, South Kazakhstan Prov.			F		1
BeeCAsia0010307	BeeCAsia 32	28/5/2017	ELKU	BeeCAsia	Halictus (Monilapis) compressus transvolgensis	Animalia	Arthropoda	Insecta	Hymenoptera	Halictidae	Halictinae	Halictus	compressus	transvolgensis	Pesenko, 1985	R. Murao	2012	O. Tadauchi	26/05/2000	KZ	Almaty	KZ5	Kemertogan, Almaty			F	host: Brassica sp.	1
BeeCAsia0010257	BeeCAsia 39	28/5/2017	ELKU	BeeCAsia	Halictus (Hexataenites) resurgens	Animalia	Arthropoda	Insecta	Hymenoptera	Halictidae	Halictinae	Halictus	resurgens		Nurse, 1903	R. Murao	2012	O. Tadauchi	11/06/2003	KZ	South Kazakhstan Prov.	KZ62	Seslavino, alt. 960 m, Daubaba river, South Kazakhstan Prov.			F		1
BeeCAsia0010256	BeeCAsia 39	28/5/2017	ELKU	BeeCAsia	Halictus (Hexataenites) resurgens	Animalia	Arthropoda	Insecta	Hymenoptera	Halictidae	Halictinae	Halictus	resurgens		Nurse, 1903	R. Murao	2012	K. Mitai	13/06/2003	KZ	South Kazakhstan Prov.	KZ62	Seslavino, alt. 960 m, Daubaba river, South Kazakhstan Prov.			F	host: Achillea biebersteinii	1
BeeCAsia0010786	BeeCAsia 20	28/5/2017	ELKU	BeeCAsia	Halictus (Seladonia) pjalmensis pjalmensis	Animalia	Arthropoda	Insecta	Hymenoptera	Halictidae	Halictinae	Halictus	pjalmensis	pjalmensis	Strand, 1909	R. Murao	2012	O. Tadauchi	17/05/2004	KZ	Jambyl Prov.	KZ26	Kordai, alt. 540-1080 m, Jambyl Prov.			F		1
BeeCAsia0011981	BeeCAsia 19	28/5/2017	ELKU	BeeCAsia	Halictus (Mucoreohalictus) mucoreus	Animalia	Arthropoda	Insecta	Hymenoptera	Halictidae	Halictinae	Halictus	mucoreus		Eversmann, 1852	R. Murao	2012	O. Tadauchi	17/05/2004	KZ	Jambyl Prov.	KZ26	Kordai, alt. 540-1080 m, Jambyl Prov.			F		1
BeeCAsia0010306	BeeCAsia 32	28/5/2017	ELKU	BeeCAsia	Halictus (Monilapis) compressus transvolgensis	Animalia	Arthropoda	Insecta	Hymenoptera	Halictidae	Halictinae	Halictus	compressus	transvolgensis	Pesenko, 1985	R. Murao	2012	A. Dawut	25/05/2000	KZ	Almaty	KZ11	Panpilof PK., Almaty			F	host: Trifolium repens	1
BeeCAsia0010255	BeeCAsia 39	28/5/2017	ELKU	BeeCAsia	Halictus (Hexataenites) resurgens	Animalia	Arthropoda	Insecta	Hymenoptera	Halictidae	Halictinae	Halictus	resurgens		Nurse, 1903	R. Murao	2012	O. Tadauchi	28/05/2000	KZ	Almaty	KZ12	Uzenagash, Almaty			F	host: Brassica sp.	1
BeeCAsia0009962	BeeCAsia 39	28/5/2017	ELKU	BeeCAsia	Halictus (Hexataenites) resurgens	Animalia	Arthropoda	Insecta	Hymenoptera	Halictidae	Halictinae	Halictus	resurgens		Nurse, 1903	R. Murao	2012	O. Tadauchi	24/05/2000	KZ	Almaty	KZ1	Almaty city			F	host: Trifolium repens	1
BeeCAsia0010411	BeeCAsia 32	28/5/2017	ELKU	BeeCAsia	Halictus (Monilapis) compressus transvolgensis	Animalia	Arthropoda	Insecta	Hymenoptera	Halictidae	Halictinae	Halictus	compressus	transvolgensis	Pesenko, 1985	R. Murao	2012	O. Tadauchi	29/05/2000	KZ	Almaty	KZ1	Almaty city			F	host: Achillea sp.	1
BeeCAsia0010094	BeeCAsia 32	28/5/2017	ELKU	BeeCAsia	Halictus (Monilapis) compressus transvolgensis	Animalia	Arthropoda	Insecta	Hymenoptera	Halictidae	Halictinae	Halictus	compressus	transvolgensis	Pesenko, 1985	R. Murao	2012	A. Dawut	29/05/2000	KZ	Almaty	KZ1	Almaty city			F	host: Trifolium repens	1
BeeCAsia0010174	BeeCAsia 31	28/5/2017	ELKU	BeeCAsia	Halictus (Halictus) brunnescens	Animalia	Arthropoda	Insecta	Hymenoptera	Halictidae	Halictinae	Halictus	brunnescens		(Eversmann, 1852)	R. Murao	2012	A. Dawut	29/05/2000	KZ	Almaty	KZ1	Almaty city			F	host: Achillea sp.	1
BeeCAsia0010261	BeeCAsia 39	28/5/2017	ELKU	BeeCAsia	Halictus (Hexataenites) resurgens	Animalia	Arthropoda	Insecta	Hymenoptera	Halictidae	Halictinae	Halictus	resurgens		Nurse, 1903	R. Murao	2012	A. Dawut	29/05/2000	KZ	Almaty	KZ1	Almaty city			F	host: Trifolium repens	1
BeeCAsia0011651	BeeCAsia 19	28/5/2017	ELKU	BeeCAsia	Halictus (Mucoreohalictus) mucoreus	Animalia	Arthropoda	Insecta	Hymenoptera	Halictidae	Halictinae	Halictus	mucoreus		Eversmann, 1852	R. Murao	2012	A. Dawut	28/05/2000	KG	Bishkek	KG1	Bishkek City			F	host: Brassica sp.	1
BeeCAsia0010260	BeeCAsia 39	28/5/2017	ELKU	BeeCAsia	Halictus (Hexataenites) resurgens	Animalia	Arthropoda	Insecta	Hymenoptera	Halictidae	Halictinae	Halictus	resurgens		Nurse, 1903	R. Murao	2012	O. Tadauchi	31/05/2003	KZ	South Kazakhstan Prov.	KZ54	Kogam, alt. 250 m, near Otrar, South Kazakhstan Prov.			F		1
BeeCAsia0010159	BeeCAsia 32	28/5/2017	ELKU	BeeCAsia	Halictus (Monilapis) compressus transvolgensis	Animalia	Arthropoda	Insecta	Hymenoptera	Halictidae	Halictinae	Halictus	compressus	transvolgensis	Pesenko, 1985	R. Murao	2012	O. Tadauchi	28/05/2003	KZ	South Kazakhstan Prov.	KZ37	Aksu Jabagly, alt. 1080-1830 m, South Kazakhstan Prov.			F		1
BeeCAsia0010160	BeeCAsia 32	28/5/2017	ELKU	BeeCAsia	Halictus (Monilapis) compressus transvolgensis	Animalia	Arthropoda	Insecta	Hymenoptera	Halictidae	Halictinae	Halictus	compressus	transvolgensis	Pesenko, 1985	R. Murao	2012	O. Tadauchi	28/05/2003	KZ	South Kazakhstan Prov.	KZ37	Aksu Jabagly, alt. 1080-1830 m, South Kazakhstan Prov.			F		1
BeeCAsia0010161	BeeCAsia 32	28/5/2017	ELKU	BeeCAsia	Halictus (Monilapis) compressus transvolgensis	Animalia	Arthropoda	Insecta	Hymenoptera	Halictidae	Halictinae	Halictus	compressus	transvolgensis	Pesenko, 1985	R. Murao	2012	O. Tadauchi	28/05/2003	KZ	South Kazakhstan Prov.	KZ37	Aksu Jabagly, alt. 1080-1830 m, South Kazakhstan Prov.			F		1
BeeCAsia0010162	BeeCAsia 32	28/5/2017	ELKU	BeeCAsia	Halictus (Monilapis) compressus transvolgensis	Animalia	Arthropoda	Insecta	Hymenoptera	Halictidae	Halictinae	Halictus	compressus	transvolgensis	Pesenko, 1985	R. Murao	2012	O. Tadauchi	28/05/2003	KZ	South Kazakhstan Prov.	KZ37	Aksu Jabagly, alt. 1080-1830 m, South Kazakhstan Prov.			F		1
BeeCAsia0010192	BeeCAsia 31	28/5/2017	ELKU	BeeCAsia	Halictus (Halictus) brunnescens	Animalia	Arthropoda	Insecta	Hymenoptera	Halictidae	Halictinae	Halictus	brunnescens		(Eversmann, 1852)	R. Murao	2012	O. Tadauchi	28/05/2003	KZ	South Kazakhstan Prov.	KZ37	Aksu Jabagly, alt. 1080-1830 m, South Kazakhstan Prov.			F		1
BeeCAsia0010258	BeeCAsia 39	28/5/2017	ELKU	BeeCAsia	Halictus (Hexataenites) resurgens	Animalia	Arthropoda	Insecta	Hymenoptera	Halictidae	Halictinae	Halictus	resurgens		Nurse, 1903	R. Murao	2012	O. Tadauchi	28/05/2003	KZ	South Kazakhstan Prov.	KZ37	Aksu Jabagly, alt. 1080-1830 m, South Kazakhstan Prov.			F		1
BeeCAsia0010383	BeeCAsia 32	28/5/2017	ELKU	BeeCAsia	Halictus (Monilapis) compressus transvolgensis	Animalia	Arthropoda	Insecta	Hymenoptera	Halictidae	Halictinae	Halictus	compressus	transvolgensis	Pesenko, 1985	R. Murao	2012	O. Tadauchi	27/05/2003	KZ	South Kazakhstan Prov.	KZ37	Aksu Jabagly, alt. 1080-1830 m, South Kazakhstan Prov.			F		1
BeeCAsia0010384	BeeCAsia 32	28/5/2017	ELKU	BeeCAsia	Halictus (Monilapis) compressus transvolgensis	Animalia	Arthropoda	Insecta	Hymenoptera	Halictidae	Halictinae	Halictus	compressus	transvolgensis	Pesenko, 1985	R. Murao	2012	O. Tadauchi	27/05/2003	KZ	South Kazakhstan Prov.	KZ37	Aksu Jabagly, alt. 1080-1830 m, South Kazakhstan Prov.			F		1
BeeCAsia0010385	BeeCAsia 32	28/5/2017	ELKU	BeeCAsia	Halictus (Monilapis) compressus transvolgensis	Animalia	Arthropoda	Insecta	Hymenoptera	Halictidae	Halictinae	Halictus	compressus	transvolgensis	Pesenko, 1985	R. Murao	2012	O. Tadauchi	27/05/2003	KZ	South Kazakhstan Prov.	KZ37	Aksu Jabagly, alt. 1080-1830 m, South Kazakhstan Prov.			F		1
BeeCAsia0010386	BeeCAsia 32	28/5/2017	ELKU	BeeCAsia	Halictus (Monilapis) compressus transvolgensis	Animalia	Arthropoda	Insecta	Hymenoptera	Halictidae	Halictinae	Halictus	compressus	transvolgensis	Pesenko, 1985	R. Murao	2012	O. Tadauchi	27/05/2003	KZ	South Kazakhstan Prov.	KZ37	Aksu Jabagly, alt. 1080-1830 m, South Kazakhstan Prov.			F		1
BeeCAsia0010387	BeeCAsia 32	28/5/2017	ELKU	BeeCAsia	Halictus (Monilapis) compressus transvolgensis	Animalia	Arthropoda	Insecta	Hymenoptera	Halictidae	Halictinae	Halictus	compressus	transvolgensis	Pesenko, 1985	R. Murao	2012	O. Tadauchi	27/05/2003	KZ	South Kazakhstan Prov.	KZ37	Aksu Jabagly, alt. 1080-1830 m, South Kazakhstan Prov.			F		1
BeeCAsia0010388	BeeCAsia 32	28/5/2017	ELKU	BeeCAsia	Halictus (Monilapis) compressus transvolgensis	Animalia	Arthropoda	Insecta	Hymenoptera	Halictidae	Halictinae	Halictus	compressus	transvolgensis	Pesenko, 1985	R. Murao	2012	O. Tadauchi	27/05/2003	KZ	South Kazakhstan Prov.	KZ37	Aksu Jabagly, alt. 1080-1830 m, South Kazakhstan Prov.			F		1
BeeCAsia0010452	BeeCAsia 39	28/5/2017	ELKU	BeeCAsia	Halictus (Hexataenites) resurgens	Animalia	Arthropoda	Insecta	Hymenoptera	Halictidae	Halictinae	Halictus	resurgens		Nurse, 1903	R. Murao	2012	O. Tadauchi	27/05/2003	KZ	South Kazakhstan Prov.	KZ37	Aksu Jabagly, alt. 1080-1830 m, South Kazakhstan Prov.			F		1
BeeCAsia0011178	BeeCAsia 19	28/5/2017	ELKU	BeeCAsia	Halictus (Mucoreohalictus) mucidus	Animalia	Arthropoda	Insecta	Hymenoptera	Halictidae	Halictinae	Halictus	mucidus		Blüthgen, 1923	R. Murao	2012	O. Tadauchi	27/05/2003	KZ	South Kazakhstan Prov.	KZ37	Aksu Jabagly, alt. 1080-1830 m, South Kazakhstan Prov.			F		1
BeeCAsia0011179	BeeCAsia 19	28/5/2017	ELKU	BeeCAsia	Halictus (Mucoreohalictus) mucidus	Animalia	Arthropoda	Insecta	Hymenoptera	Halictidae	Halictinae	Halictus	mucidus		Blüthgen, 1923	R. Murao	2012	O. Tadauchi	27/05/2003	KZ	South Kazakhstan Prov.	KZ37	Aksu Jabagly, alt. 1080-1830 m, South Kazakhstan Prov.			F		1
BeeCAsia0010465	BeeCAsia 32	28/5/2017	ELKU	BeeCAsia	Halictus (Tytthalictus) palustris	Animalia	Arthropoda	Insecta	Hymenoptera	Halictidae	Halictinae	Halictus	palustris		Morawitz, 1876	R. Murao	2012	K. Mitai	14/06/2003	KZ	South Kazakhstan Prov.	KZ37	Aksu Jabagly, alt. 1080-1830 m, South Kazakhstan Prov.			F	host: Ferula tenuisecta	1
BeeCAsia0011493	BeeCAsia 21	28/5/2017	ELKU	BeeCAsia	Halictus (Seladonia) seladonius	Animalia	Arthropoda	Insecta	Hymenoptera	Halictidae	Halictinae	Halictus	seladonius		(Fabricius, 1794)	R. Murao	2012	K. Mitai	14/06/2003	KZ	South Kazakhstan Prov.	KZ37	Aksu Jabagly, alt. 1080-1830 m, South Kazakhstan Prov.			F	host: Schrenkia golickeana	1
BeeCAsia0010457	BeeCAsia 39	28/5/2017	ELKU	BeeCAsia	Halictus (Hexataenites) resurgens	Animalia	Arthropoda	Insecta	Hymenoptera	Halictidae	Halictinae	Halictus	resurgens		Nurse, 1903	R. Murao	2012	K. Mitai	28/05/2003	KZ	South Kazakhstan Prov.	KZ37	Aksu Jabagly, alt. 1080-1830 m, South Kazakhstan Prov.			F	host: Trifolium repens	1
BeeCAsia0010458	BeeCAsia 39	28/5/2017	ELKU	BeeCAsia	Halictus (Hexataenites) resurgens	Animalia	Arthropoda	Insecta	Hymenoptera	Halictidae	Halictinae	Halictus	resurgens		Nurse, 1903	R. Murao	2012	K. Mitai	28/05/2003	KZ	South Kazakhstan Prov.	KZ37	Aksu Jabagly, alt. 1080-1830 m, South Kazakhstan Prov.			F	host: Trifolium repens	1
BeeCAsia0010459	BeeCAsia 39	28/5/2017	ELKU	BeeCAsia	Halictus (Hexataenites) resurgens	Animalia	Arthropoda	Insecta	Hymenoptera	Halictidae	Halictinae	Halictus	resurgens		Nurse, 1903	R. Murao	2012	K. Mitai	28/05/2003	KZ	South Kazakhstan Prov.	KZ37	Aksu Jabagly, alt. 1080-1830 m, South Kazakhstan Prov.			F		1
BeeCAsia0010460	BeeCAsia 39	28/5/2017	ELKU	BeeCAsia	Halictus (Hexataenites) resurgens	Animalia	Arthropoda	Insecta	Hymenoptera	Halictidae	Halictinae	Halictus	resurgens		Nurse, 1903	R. Murao	2012	K. Mitai	28/05/2003	KZ	South Kazakhstan Prov.	KZ37	Aksu Jabagly, alt. 1080-1830 m, South Kazakhstan Prov.			F	host: Trifolium repens	1
BeeCAsia0010461	BeeCAsia 39	28/5/2017	ELKU	BeeCAsia	Halictus (Hexataenites) resurgens	Animalia	Arthropoda	Insecta	Hymenoptera	Halictidae	Halictinae	Halictus	resurgens		Nurse, 1903	R. Murao	2012	K. Mitai	28/05/2003	KZ	South Kazakhstan Prov.	KZ37	Aksu Jabagly, alt. 1080-1830 m, South Kazakhstan Prov.			F	host: Trifolium repens	1
BeeCAsia0010462	BeeCAsia 39	28/5/2017	ELKU	BeeCAsia	Halictus (Hexataenites) resurgens	Animalia	Arthropoda	Insecta	Hymenoptera	Halictidae	Halictinae	Halictus	resurgens		Nurse, 1903	R. Murao	2012	K. Mitai	28/05/2003	KZ	South Kazakhstan Prov.	KZ37	Aksu Jabagly, alt. 1080-1830 m, South Kazakhstan Prov.			F	host: Trifolium repens	1
BeeCAsia0010463	BeeCAsia 39	28/5/2017	ELKU	BeeCAsia	Halictus (Hexataenites) resurgens	Animalia	Arthropoda	Insecta	Hymenoptera	Halictidae	Halictinae	Halictus	resurgens		Nurse, 1903	R. Murao	2012	K. Mitai	28/05/2003	KZ	South Kazakhstan Prov.	KZ37	Aksu Jabagly, alt. 1080-1830 m, South Kazakhstan Prov.			F	host: Trifolium repens	1
BeeCAsia0009994	BeeCAsia 39	28/5/2017	ELKU	BeeCAsia	Halictus (Hexataenites) resurgens	Animalia	Arthropoda	Insecta	Hymenoptera	Halictidae	Halictinae	Halictus	resurgens		Nurse, 1903	R. Murao	2012	K. Mitai	28/05/2003	KZ	South Kazakhstan Prov.	KZ37	Aksu Jabagly, alt. 1080-1830 m, South Kazakhstan Prov.			F	host: Papaver pavoninum	1
BeeCAsia0010887	BeeCAsia 20	28/5/2017	ELKU	BeeCAsia	Halictus (Seladonia) seladonius	Animalia	Arthropoda	Insecta	Hymenoptera	Halictidae	Halictinae	Halictus	seladonius		(Fabricius, 1794)	R. Murao	2012	K. Mitai	28/05/2003	KZ	South Kazakhstan Prov.	KZ37	Aksu Jabagly, alt. 1080-1830 m, South Kazakhstan Prov.			F	Collected by Yellow Pan Trap	1
BeeCAsia0010912	BeeCAsia 20	28/5/2017	ELKU	BeeCAsia	Halictus (Seladonia) seladonius	Animalia	Arthropoda	Insecta	Hymenoptera	Halictidae	Halictinae	Halictus	seladonius		(Fabricius, 1794)	R. Murao	2012	K. Mitai	28/05/2003	KZ	South Kazakhstan Prov.	KZ37	Aksu Jabagly, alt. 1080-1830 m, South Kazakhstan Prov.			F	Collected by Yellow Pan Trap	1
BeeCAsia0011887	BeeCAsia 19	28/5/2017	ELKU	BeeCAsia	Halictus (Mucoreohalictus) mucidus	Animalia	Arthropoda	Insecta	Hymenoptera	Halictidae	Halictinae	Halictus	mucidus		Blüthgen, 1923	R. Murao	2012	K. Mitai	28/05/2003	KZ	South Kazakhstan Prov.	KZ37	Aksu Jabagly, alt. 1080-1830 m, South Kazakhstan Prov.			F	Collected by Yellow Pan Trap	1
BeeCAsia0011889	BeeCAsia 19	28/5/2017	ELKU	BeeCAsia	Halictus (Mucoreohalictus) mucidus	Animalia	Arthropoda	Insecta	Hymenoptera	Halictidae	Halictinae	Halictus	mucidus		Blüthgen, 1923	R. Murao	2012	K. Mitai	28/05/2003	KZ	South Kazakhstan Prov.	KZ37	Aksu Jabagly, alt. 1080-1830 m, South Kazakhstan Prov.			F		1
BeeCAsia0011890	BeeCAsia 19	28/5/2017	ELKU	BeeCAsia	Halictus (Mucoreohalictus) mucidus	Animalia	Arthropoda	Insecta	Hymenoptera	Halictidae	Halictinae	Halictus	mucidus		Blüthgen, 1923	R. Murao	2012	K. Mitai	28/05/2003	KZ	South Kazakhstan Prov.	KZ37	Aksu Jabagly, alt. 1080-1830 m, South Kazakhstan Prov.			F	Collected by Yellow Pan Trap	1
BeeCAsia0012004	BeeCAsia 19	28/5/2017	ELKU	BeeCAsia	Halictus (Seladonia) seladonius	Animalia	Arthropoda	Insecta	Hymenoptera	Halictidae	Halictinae	Halictus	seladonius		(Fabricius, 1794)	R. Murao	2012	K. Mitai	28/05/2003	KZ	South Kazakhstan Prov.	KZ37	Aksu Jabagly, alt. 1080-1830 m, South Kazakhstan Prov.			F		1
BeeCAsia0009618	BeeCAsia 31	28/5/2017	ELKU	BeeCAsia	Halictus (Halictus) brunnescens	Animalia	Arthropoda	Insecta	Hymenoptera	Halictidae	Halictinae	Halictus	brunnescens		(Eversmann, 1852)	R. Murao	2012	K. Mitai	28/05/2003	KZ	South Kazakhstan Prov.	KZ37	Aksu Jabagly, alt. 1080-1830 m, South Kazakhstan Prov.			F	Collected by Yellow Pan Trap	1
BeeCAsia0009619	BeeCAsia 31	28/5/2017	ELKU	BeeCAsia	Halictus (Halictus) brunnescens	Animalia	Arthropoda	Insecta	Hymenoptera	Halictidae	Halictinae	Halictus	brunnescens		(Eversmann, 1852)	R. Murao	2012	K. Mitai	28/05/2003	KZ	South Kazakhstan Prov.	KZ37	Aksu Jabagly, alt. 1080-1830 m, South Kazakhstan Prov.			F		1
BeeCAsia0009626	BeeCAsia 31	28/5/2017	ELKU	BeeCAsia	Halictus (Halictus) brunnescens	Animalia	Arthropoda	Insecta	Hymenoptera	Halictidae	Halictinae	Halictus	brunnescens		(Eversmann, 1852)	R. Murao	2012	K. Mitai	28/05/2003	KZ	South Kazakhstan Prov.	KZ37	Aksu Jabagly, alt. 1080-1830 m, South Kazakhstan Prov.			F	Collected by Yellow Pan Trap	1
BeeCAsia0010397	BeeCAsia 32	28/5/2017	ELKU	BeeCAsia	Halictus (Monilapis) compressus transvolgensis	Animalia	Arthropoda	Insecta	Hymenoptera	Halictidae	Halictinae	Halictus	compressus	transvolgensis	Pesenko, 1985	R. Murao	2012	K. Mitai	27/05/2003	KZ	South Kazakhstan Prov.	KZ37	Aksu Jabagly, alt. 1080-1830 m, South Kazakhstan Prov.			F	host: Trifolium repens	1
BeeCAsia0010400	BeeCAsia 32	28/5/2017	ELKU	BeeCAsia	Halictus (Monilapis) compressus transvolgensis	Animalia	Arthropoda	Insecta	Hymenoptera	Halictidae	Halictinae	Halictus	compressus	transvolgensis	Pesenko, 1985	R. Murao	2012	K. Mitai	27/05/2003	KZ	South Kazakhstan Prov.	KZ37	Aksu Jabagly, alt. 1080-1830 m, South Kazakhstan Prov.			F	host: Trollius altaicus	1
BeeCAsia0010401	BeeCAsia 32	28/5/2017	ELKU	BeeCAsia	Halictus (Monilapis) compressus transvolgensis	Animalia	Arthropoda	Insecta	Hymenoptera	Halictidae	Halictinae	Halictus	compressus	transvolgensis	Pesenko, 1985	R. Murao	2012	K. Mitai	27/05/2003	KZ	South Kazakhstan Prov.	KZ37	Aksu Jabagly, alt. 1080-1830 m, South Kazakhstan Prov.			F	host: Trifolium repens	1
BeeCAsia0010402	BeeCAsia 32	28/5/2017	ELKU	BeeCAsia	Halictus (Monilapis) compressus transvolgensis	Animalia	Arthropoda	Insecta	Hymenoptera	Halictidae	Halictinae	Halictus	compressus	transvolgensis	Pesenko, 1985	R. Murao	2012	K. Mitai	27/05/2003	KZ	South Kazakhstan Prov.	KZ37	Aksu Jabagly, alt. 1080-1830 m, South Kazakhstan Prov.			F	host: Trifolium repens	1
BeeCAsia0010403	BeeCAsia 32	28/5/2017	ELKU	BeeCAsia	Halictus (Monilapis) compressus transvolgensis	Animalia	Arthropoda	Insecta	Hymenoptera	Halictidae	Halictinae	Halictus	compressus	transvolgensis	Pesenko, 1985	R. Murao	2012	K. Mitai	27/05/2003	KZ	South Kazakhstan Prov.	KZ37	Aksu Jabagly, alt. 1080-1830 m, South Kazakhstan Prov.			F	host: Trifolium repens	1
BeeCAsia0010404	BeeCAsia 32	28/5/2017	ELKU	BeeCAsia	Halictus (Monilapis) compressus transvolgensis	Animalia	Arthropoda	Insecta	Hymenoptera	Halictidae	Halictinae	Halictus	compressus	transvolgensis	Pesenko, 1985	R. Murao	2012	K. Mitai	27/05/2003	KZ	South Kazakhstan Prov.	KZ37	Aksu Jabagly, alt. 1080-1830 m, South Kazakhstan Prov.			F	host: Trollius altaicus	1
BeeCAsia0010405	BeeCAsia 32	28/5/2017	ELKU	BeeCAsia	Halictus (Monilapis) compressus transvolgensis	Animalia	Arthropoda	Insecta	Hymenoptera	Halictidae	Halictinae	Halictus	compressus	transvolgensis	Pesenko, 1985	R. Murao	2012	K. Mitai	27/05/2003	KZ	South Kazakhstan Prov.	KZ37	Aksu Jabagly, alt. 1080-1830 m, South Kazakhstan Prov.			F	host: Trollius altaicus	1
BeeCAsia0010406	BeeCAsia 32	28/5/2017	ELKU	BeeCAsia	Halictus (Monilapis) compressus transvolgensis	Animalia	Arthropoda	Insecta	Hymenoptera	Halictidae	Halictinae	Halictus	compressus	transvolgensis	Pesenko, 1985	R. Murao	2012	K. Mitai	27/05/2003	KZ	South Kazakhstan Prov.	KZ37	Aksu Jabagly, alt. 1080-1830 m, South Kazakhstan Prov.			F	host: Trifolium repens	1
BeeCAsia0010407	BeeCAsia 32	28/5/2017	ELKU	BeeCAsia	Halictus (Monilapis) compressus transvolgensis	Animalia	Arthropoda	Insecta	Hymenoptera	Halictidae	Halictinae	Halictus	compressus	transvolgensis	Pesenko, 1985	R. Murao	2012	K. Mitai	27/05/2003	KZ	South Kazakhstan Prov.	KZ37	Aksu Jabagly, alt. 1080-1830 m, South Kazakhstan Prov.			F	host: Rosa kokanica	1
BeeCAsia0010408	BeeCAsia 32	28/5/2017	ELKU	BeeCAsia	Halictus (Monilapis) compressus transvolgensis	Animalia	Arthropoda	Insecta	Hymenoptera	Halictidae	Halictinae	Halictus	compressus	transvolgensis	Pesenko, 1985	R. Murao	2012	K. Mitai	27/05/2003	KZ	South Kazakhstan Prov.	KZ37	Aksu Jabagly, alt. 1080-1830 m, South Kazakhstan Prov.			F	host: Trifolium repens	1
BeeCAsia0010409	BeeCAsia 32	28/5/2017	ELKU	BeeCAsia	Halictus (Monilapis) compressus transvolgensis	Animalia	Arthropoda	Insecta	Hymenoptera	Halictidae	Halictinae	Halictus	compressus	transvolgensis	Pesenko, 1985	R. Murao	2012	K. Mitai	27/05/2003	KZ	South Kazakhstan Prov.	KZ37	Aksu Jabagly, alt. 1080-1830 m, South Kazakhstan Prov.			F	host: Rhamnus cathartica	1
BeeCAsia0010410	BeeCAsia 32	28/5/2017	ELKU	BeeCAsia	Halictus (Monilapis) compressus transvolgensis	Animalia	Arthropoda	Insecta	Hymenoptera	Halictidae	Halictinae	Halictus	compressus	transvolgensis	Pesenko, 1985	R. Murao	2012	K. Mitai	27/05/2003	KZ	South Kazakhstan Prov.	KZ37	Aksu Jabagly, alt. 1080-1830 m, South Kazakhstan Prov.			F	host: Rhamnus cathartica	1
BeeCAsia0010414	BeeCAsia 32	28/5/2017	ELKU	BeeCAsia	Halictus (Monilapis) compressus transvolgensis	Animalia	Arthropoda	Insecta	Hymenoptera	Halictidae	Halictinae	Halictus	compressus	transvolgensis	Pesenko, 1985	R. Murao	2012	K. Mitai	27/05/2003	KZ	South Kazakhstan Prov.	KZ37	Aksu Jabagly, alt. 1080-1830 m, South Kazakhstan Prov.			F	host: Trifolium repens	1
BeeCAsia0010413	BeeCAsia 32	28/5/2017	ELKU	BeeCAsia	Halictus (Monilapis) compressus transvolgensis	Animalia	Arthropoda	Insecta	Hymenoptera	Halictidae	Halictinae	Halictus	compressus	transvolgensis	Pesenko, 1985	R. Murao	2012	K. Mitai	27/05/2003	KZ	South Kazakhstan Prov.	KZ37	Aksu Jabagly, alt. 1080-1830 m, South Kazakhstan Prov.			F	host: Rosa kokanica	1
BeeCAsia0010443	BeeCAsia 39	28/5/2017	ELKU	BeeCAsia	Halictus (Hexataenites) resurgens	Animalia	Arthropoda	Insecta	Hymenoptera	Halictidae	Halictinae	Halictus	resurgens		Nurse, 1903	R. Murao	2012	K. Mitai	27/05/2003	KZ	South Kazakhstan Prov.	KZ37	Aksu Jabagly, alt. 1080-1830 m, South Kazakhstan Prov.			F	host: Rosa kokanica	1
BeeCAsia0010444	BeeCAsia 39	28/5/2017	ELKU	BeeCAsia	Halictus (Hexataenites) resurgens	Animalia	Arthropoda	Insecta	Hymenoptera	Halictidae	Halictinae	Halictus	resurgens		Nurse, 1903	R. Murao	2012	K. Mitai	27/05/2003	KZ	South Kazakhstan Prov.	KZ37	Aksu Jabagly, alt. 1080-1830 m, South Kazakhstan Prov.			F	host: Taraxacum sp.	1
BeeCAsia0010445	BeeCAsia 39	28/5/2017	ELKU	BeeCAsia	Halictus (Hexataenites) resurgens	Animalia	Arthropoda	Insecta	Hymenoptera	Halictidae	Halictinae	Halictus	resurgens		Nurse, 1903	R. Murao	2012	K. Mitai	27/05/2003	KZ	South Kazakhstan Prov.	KZ37	Aksu Jabagly, alt. 1080-1830 m, South Kazakhstan Prov.			F	host: Trifolium repens	1
BeeCAsia0010446	BeeCAsia 39	28/5/2017	ELKU	BeeCAsia	Halictus (Hexataenites) resurgens	Animalia	Arthropoda	Insecta	Hymenoptera	Halictidae	Halictinae	Halictus	resurgens		Nurse, 1903	R. Murao	2012	K. Mitai	27/05/2003	KZ	South Kazakhstan Prov.	KZ37	Aksu Jabagly, alt. 1080-1830 m, South Kazakhstan Prov.			F		1
BeeCAsia0010447	BeeCAsia 39	28/5/2017	ELKU	BeeCAsia	Halictus (Hexataenites) resurgens	Animalia	Arthropoda	Insecta	Hymenoptera	Halictidae	Halictinae	Halictus	resurgens		Nurse, 1903	R. Murao	2012	K. Mitai	27/05/2003	KZ	South Kazakhstan Prov.	KZ37	Aksu Jabagly, alt. 1080-1830 m, South Kazakhstan Prov.			F	host: Trifolium repens	1
BeeCAsia0010466	BeeCAsia 32	28/5/2017	ELKU	BeeCAsia	Halictus (Tytthalictus) palustris	Animalia	Arthropoda	Insecta	Hymenoptera	Halictidae	Halictinae	Halictus	palustris		Morawitz, 1876	R. Murao	2012	K. Mitai	27/05/2003	KZ	South Kazakhstan Prov.	KZ37	Aksu Jabagly, alt. 1080-1830 m, South Kazakhstan Prov.			F		1
BeeCAsia0009620	BeeCAsia 31	28/5/2017	ELKU	BeeCAsia	Halictus (Halictus) brunnescens	Animalia	Arthropoda	Insecta	Hymenoptera	Halictidae	Halictinae	Halictus	brunnescens		(Eversmann, 1852)	R. Murao	2012	K. Mitai	27/05/2003	KZ	South Kazakhstan Prov.	KZ37	Aksu Jabagly, alt. 1080-1830 m, South Kazakhstan Prov.			F	host: Ferula tenuisecta	1
BeeCAsia0009621	BeeCAsia 31	28/5/2017	ELKU	BeeCAsia	Halictus (Halictus) brunnescens	Animalia	Arthropoda	Insecta	Hymenoptera	Halictidae	Halictinae	Halictus	brunnescens		(Eversmann, 1852)	R. Murao	2012	K. Mitai	27/05/2003	KZ	South Kazakhstan Prov.	KZ37	Aksu Jabagly, alt. 1080-1830 m, South Kazakhstan Prov.			F	host: Trifolium repens	1
BeeCAsia0009622	BeeCAsia 31	28/5/2017	ELKU	BeeCAsia	Halictus (Halictus) brunnescens	Animalia	Arthropoda	Insecta	Hymenoptera	Halictidae	Halictinae	Halictus	brunnescens		(Eversmann, 1852)	R. Murao	2012	K. Mitai	27/05/2003	KZ	South Kazakhstan Prov.	KZ37	Aksu Jabagly, alt. 1080-1830 m, South Kazakhstan Prov.			F	host: Taraxacum sp.	1
BeeCAsia0009623	BeeCAsia 31	28/5/2017	ELKU	BeeCAsia	Halictus (Halictus) brunnescens	Animalia	Arthropoda	Insecta	Hymenoptera	Halictidae	Halictinae	Halictus	brunnescens		(Eversmann, 1852)	R. Murao	2012	K. Mitai	27/05/2003	KZ	South Kazakhstan Prov.	KZ37	Aksu Jabagly, alt. 1080-1830 m, South Kazakhstan Prov.			F	host: Trifolium repens	1
BeeCAsia0009961	BeeCAsia 39	28/5/2017	ELKU	BeeCAsia	Halictus (Hexataenites) resurgens	Animalia	Arthropoda	Insecta	Hymenoptera	Halictidae	Halictinae	Halictus	resurgens		Nurse, 1903	R. Murao	2012	R. Murao	07/09/2002	KZ	South Kazakhstan Prov.	KZ37	Aksu Jabagly, alt. 1080-1830 m, South Kazakhstan Prov.			F	host: Chondrilla sp.	1
BeeCAsia0010425	BeeCAsia 39	28/5/2017	ELKU	BeeCAsia	Halictus (Platyhalictus) minor	Animalia	Arthropoda	Insecta	Hymenoptera	Halictidae	Halictinae	Halictus	minor		Morawitz, 1876	R. Murao	2012	O. Tadauchi	04/09/2002	KZ	South Kazakhstan Prov.	KZ37	Aksu Jabagly, alt. 1080-1830 m, South Kazakhstan Prov.			F	host: Cirsium sp.	1
BeeCAsia0010424	BeeCAsia 39	28/5/2017	ELKU	BeeCAsia	Halictus (Platyhalictus) minor	Animalia	Arthropoda	Insecta	Hymenoptera	Halictidae	Halictinae	Halictus	minor		Morawitz, 1876	R. Murao	2012	O. Tadauchi	04/09/2002	KZ	South Kazakhstan Prov.	KZ37	Aksu Jabagly, alt. 1080-1830 m, South Kazakhstan Prov.			F		1
BeeCAsia0010432	BeeCAsia 39	28/5/2017	ELKU	BeeCAsia	Halictus (Hexataenites) resurgens	Animalia	Arthropoda	Insecta	Hymenoptera	Halictidae	Halictinae	Halictus	resurgens		Nurse, 1903	R. Murao	2012	O. Tadauchi	04/09/2002	KZ	South Kazakhstan Prov.	KZ37	Aksu Jabagly, alt. 1080-1830 m, South Kazakhstan Prov.			F		1
BeeCAsia0009958	BeeCAsia 39	28/5/2017	ELKU	BeeCAsia	Halictus (Hexataenites) resurgens	Animalia	Arthropoda	Insecta	Hymenoptera	Halictidae	Halictinae	Halictus	resurgens		Nurse, 1903	R. Murao	2012	O. Tadauchi	04/09/2002	KZ	South Kazakhstan Prov.	KZ37	Aksu Jabagly, alt. 1080-1830 m, South Kazakhstan Prov.			F	host: Asteraceae gen. et. sp.	1
BeeCAsia0010426	BeeCAsia 39	28/5/2017	ELKU	BeeCAsia	Halictus (Platyhalictus) minor	Animalia	Arthropoda	Insecta	Hymenoptera	Halictidae	Halictinae	Halictus	minor		Morawitz, 1876	R. Murao	2012	O. Tadauchi	04/09/2002	KZ	South Kazakhstan Prov.	KZ37	Aksu Jabagly, alt. 1080-1830 m, South Kazakhstan Prov.			F		1
BeeCAsia0010427	BeeCAsia 39	28/5/2017	ELKU	BeeCAsia	Halictus (Platyhalictus) minor	Animalia	Arthropoda	Insecta	Hymenoptera	Halictidae	Halictinae	Halictus	minor		Morawitz, 1876	R. Murao	2012	O. Tadauchi	04/09/2002	KZ	South Kazakhstan Prov.	KZ37	Aksu Jabagly, alt. 1080-1830 m, South Kazakhstan Prov.			F		1
BeeCAsia0010428	BeeCAsia 39	28/5/2017	ELKU	BeeCAsia	Halictus (Platyhalictus) minor	Animalia	Arthropoda	Insecta	Hymenoptera	Halictidae	Halictinae	Halictus	minor		Morawitz, 1876	R. Murao	2012	O. Tadauchi	04/09/2002	KZ	South Kazakhstan Prov.	KZ37	Aksu Jabagly, alt. 1080-1830 m, South Kazakhstan Prov.			F		1
BeeCAsia0010429	BeeCAsia 39	28/5/2017	ELKU	BeeCAsia	Halictus (Platyhalictus) minor	Animalia	Arthropoda	Insecta	Hymenoptera	Halictidae	Halictinae	Halictus	minor		Morawitz, 1876	R. Murao	2012	O. Tadauchi	04/09/2002	KZ	South Kazakhstan Prov.	KZ37	Aksu Jabagly, alt. 1080-1830 m, South Kazakhstan Prov.			F		1
BeeCAsia0009970	BeeCAsia 39	28/5/2017	ELKU	BeeCAsia	Halictus (Hexataenites) resurgens	Animalia	Arthropoda	Insecta	Hymenoptera	Halictidae	Halictinae	Halictus	resurgens		Nurse, 1903	R. Murao	2012	O. Tadauchi	04/09/2002	KZ	South Kazakhstan Prov.	KZ37	Aksu Jabagly, alt. 1080-1830 m, South Kazakhstan Prov.			F		1
BeeCAsia0010042	BeeCAsia 39	28/5/2017	ELKU	BeeCAsia	Halictus (Platyhalictus) minor	Animalia	Arthropoda	Insecta	Hymenoptera	Halictidae	Halictinae	Halictus	minor		Morawitz, 1876	R. Murao	2012	O. Tadauchi	04/09/2002	KZ	South Kazakhstan Prov.	KZ37	Aksu Jabagly, alt. 1080-1830 m, South Kazakhstan Prov.			F		1
BeeCAsia0009892	BeeCAsia 31	28/5/2017	ELKU	BeeCAsia	Halictus (Halictus) brunnescens	Animalia	Arthropoda	Insecta	Hymenoptera	Halictidae	Halictinae	Halictus	brunnescens		(Eversmann, 1852)	R. Murao	2012	O. Tadauchi	04/09/2002	KZ	South Kazakhstan Prov.	KZ37	Aksu Jabagly, alt. 1080-1830 m, South Kazakhstan Prov.			M		1
BeeCAsia0009891	BeeCAsia 31	28/5/2017	ELKU	BeeCAsia	Halictus (Halictus) brunnescens	Animalia	Arthropoda	Insecta	Hymenoptera	Halictidae	Halictinae	Halictus	brunnescens		(Eversmann, 1852)	R. Murao	2012	O. Tadauchi	04/09/2002	KZ	South Kazakhstan Prov.	KZ37	Aksu Jabagly, alt. 1080-1830 m, South Kazakhstan Prov.			M	host: Mentha asiatica	1
BeeCAsia0009893	BeeCAsia 31	28/5/2017	ELKU	BeeCAsia	Halictus (Halictus) brunnescens	Animalia	Arthropoda	Insecta	Hymenoptera	Halictidae	Halictinae	Halictus	brunnescens		(Eversmann, 1852)	R. Murao	2012	O. Tadauchi	04/09/2002	KZ	South Kazakhstan Prov.	KZ37	Aksu Jabagly, alt. 1080-1830 m, South Kazakhstan Prov.			M	host: Mentha asiatica	1
BeeCAsia0010503	BeeCAsia 31	28/5/2017	ELKU	BeeCAsia	Halictus (Halictus) brunnescens	Animalia	Arthropoda	Insecta	Hymenoptera	Halictidae	Halictinae	Halictus	brunnescens		(Eversmann, 1852)	R. Murao	2012	O. Tadauchi	04/09/2002	KZ	South Kazakhstan Prov.	KZ37	Aksu Jabagly, alt. 1080-1830 m, South Kazakhstan Prov.			M	host: Mentha asiatica	1
BeeCAsia0010504	BeeCAsia 31	28/5/2017	ELKU	BeeCAsia	Halictus (Halictus) brunnescens	Animalia	Arthropoda	Insecta	Hymenoptera	Halictidae	Halictinae	Halictus	brunnescens		(Eversmann, 1852)	R. Murao	2012	O. Tadauchi	04/09/2002	KZ	South Kazakhstan Prov.	KZ37	Aksu Jabagly, alt. 1080-1830 m, South Kazakhstan Prov.			M	host: Mentha asiatica	1
BeeCAsia0010505	BeeCAsia 31	28/5/2017	ELKU	BeeCAsia	Halictus (Halictus) brunnescens	Animalia	Arthropoda	Insecta	Hymenoptera	Halictidae	Halictinae	Halictus	brunnescens		(Eversmann, 1852)	R. Murao	2012	O. Tadauchi	04/09/2002	KZ	South Kazakhstan Prov.	KZ37	Aksu Jabagly, alt. 1080-1830 m, South Kazakhstan Prov.			M	host: Mentha asiatica	1
BeeCAsia0010506	BeeCAsia 31	28/5/2017	ELKU	BeeCAsia	Halictus (Halictus) brunnescens	Animalia	Arthropoda	Insecta	Hymenoptera	Halictidae	Halictinae	Halictus	brunnescens		(Eversmann, 1852)	R. Murao	2012	O. Tadauchi	04/09/2002	KZ	South Kazakhstan Prov.	KZ37	Aksu Jabagly, alt. 1080-1830 m, South Kazakhstan Prov.			M	host: Mentha asiatica	1
BeeCAsia0010507	BeeCAsia 31	28/5/2017	ELKU	BeeCAsia	Halictus (Halictus) brunnescens	Animalia	Arthropoda	Insecta	Hymenoptera	Halictidae	Halictinae	Halictus	brunnescens		(Eversmann, 1852)	R. Murao	2012	O. Tadauchi	04/09/2002	KZ	South Kazakhstan Prov.	KZ37	Aksu Jabagly, alt. 1080-1830 m, South Kazakhstan Prov.			M	host: Mentha asiatica	1
BeeCAsia0010508	BeeCAsia 31	28/5/2017	ELKU	BeeCAsia	Halictus (Halictus) brunnescens	Animalia	Arthropoda	Insecta	Hymenoptera	Halictidae	Halictinae	Halictus	brunnescens		(Eversmann, 1852)	R. Murao	2012	O. Tadauchi	04/09/2002	KZ	South Kazakhstan Prov.	KZ37	Aksu Jabagly, alt. 1080-1830 m, South Kazakhstan Prov.			M	host: Mentha asiatica	1
BeeCAsia0010509	BeeCAsia 31	28/5/2017	ELKU	BeeCAsia	Halictus (Halictus) brunnescens	Animalia	Arthropoda	Insecta	Hymenoptera	Halictidae	Halictinae	Halictus	brunnescens		(Eversmann, 1852)	R. Murao	2012	O. Tadauchi	04/09/2002	KZ	South Kazakhstan Prov.	KZ37	Aksu Jabagly, alt. 1080-1830 m, South Kazakhstan Prov.			M	host: Mentha asiatica	1
BeeCAsia0010510	BeeCAsia 31	28/5/2017	ELKU	BeeCAsia	Halictus (Halictus) brunnescens	Animalia	Arthropoda	Insecta	Hymenoptera	Halictidae	Halictinae	Halictus	brunnescens		(Eversmann, 1852)	R. Murao	2012	O. Tadauchi	04/09/2002	KZ	South Kazakhstan Prov.	KZ37	Aksu Jabagly, alt. 1080-1830 m, South Kazakhstan Prov.			M	host: Mentha asiatica	1
BeeCAsia0010511	BeeCAsia 31	28/5/2017	ELKU	BeeCAsia	Halictus (Halictus) brunnescens	Animalia	Arthropoda	Insecta	Hymenoptera	Halictidae	Halictinae	Halictus	brunnescens		(Eversmann, 1852)	R. Murao	2012	O. Tadauchi	04/09/2002	KZ	South Kazakhstan Prov.	KZ37	Aksu Jabagly, alt. 1080-1830 m, South Kazakhstan Prov.			M	host: Mentha asiatica	1
BeeCAsia0010512	BeeCAsia 31	28/5/2017	ELKU	BeeCAsia	Halictus (Halictus) brunnescens	Animalia	Arthropoda	Insecta	Hymenoptera	Halictidae	Halictinae	Halictus	brunnescens		(Eversmann, 1852)	R. Murao	2012	O. Tadauchi	04/09/2002	KZ	South Kazakhstan Prov.	KZ37	Aksu Jabagly, alt. 1080-1830 m, South Kazakhstan Prov.			M	host: Mentha asiatica	1
BeeCAsia0010513	BeeCAsia 31	28/5/2017	ELKU	BeeCAsia	Halictus (Halictus) brunnescens	Animalia	Arthropoda	Insecta	Hymenoptera	Halictidae	Halictinae	Halictus	brunnescens		(Eversmann, 1852)	R. Murao	2012	O. Tadauchi	04/09/2002	KZ	South Kazakhstan Prov.	KZ37	Aksu Jabagly, alt. 1080-1830 m, South Kazakhstan Prov.			M	host: Mentha asiatica	1
BeeCAsia0010514	BeeCAsia 31	28/5/2017	ELKU	BeeCAsia	Halictus (Halictus) brunnescens	Animalia	Arthropoda	Insecta	Hymenoptera	Halictidae	Halictinae	Halictus	brunnescens		(Eversmann, 1852)	R. Murao	2012	O. Tadauchi	04/09/2002	KZ	South Kazakhstan Prov.	KZ37	Aksu Jabagly, alt. 1080-1830 m, South Kazakhstan Prov.			M	host: Mentha asiatica	1
BeeCAsia0010515	BeeCAsia 31	28/5/2017	ELKU	BeeCAsia	Halictus (Halictus) brunnescens	Animalia	Arthropoda	Insecta	Hymenoptera	Halictidae	Halictinae	Halictus	brunnescens		(Eversmann, 1852)	R. Murao	2012	O. Tadauchi	04/09/2002	KZ	South Kazakhstan Prov.	KZ37	Aksu Jabagly, alt. 1080-1830 m, South Kazakhstan Prov.			M	host: Mentha asiatica	1
BeeCAsia0010516	BeeCAsia 31	28/5/2017	ELKU	BeeCAsia	Halictus (Halictus) brunnescens	Animalia	Arthropoda	Insecta	Hymenoptera	Halictidae	Halictinae	Halictus	brunnescens		(Eversmann, 1852)	R. Murao	2012	O. Tadauchi	04/09/2002	KZ	South Kazakhstan Prov.	KZ37	Aksu Jabagly, alt. 1080-1830 m, South Kazakhstan Prov.			M	host: Mentha asiatica	1
BeeCAsia0010517	BeeCAsia 31	28/5/2017	ELKU	BeeCAsia	Halictus (Halictus) brunnescens	Animalia	Arthropoda	Insecta	Hymenoptera	Halictidae	Halictinae	Halictus	brunnescens		(Eversmann, 1852)	R. Murao	2012	O. Tadauchi	04/09/2002	KZ	South Kazakhstan Prov.	KZ37	Aksu Jabagly, alt. 1080-1830 m, South Kazakhstan Prov.			M	host: Mentha asiatica	1
BeeCAsia0010518	BeeCAsia 31	28/5/2017	ELKU	BeeCAsia	Halictus (Halictus) brunnescens	Animalia	Arthropoda	Insecta	Hymenoptera	Halictidae	Halictinae	Halictus	brunnescens		(Eversmann, 1852)	R. Murao	2012	O. Tadauchi	04/09/2002	KZ	South Kazakhstan Prov.	KZ37	Aksu Jabagly, alt. 1080-1830 m, South Kazakhstan Prov.			M	host: Mentha asiatica	1
BeeCAsia0010525	BeeCAsia 31	28/5/2017	ELKU	BeeCAsia	Halictus (Halictus) brunnescens	Animalia	Arthropoda	Insecta	Hymenoptera	Halictidae	Halictinae	Halictus	brunnescens		(Eversmann, 1852)	R. Murao	2012	O. Tadauchi	04/09/2002	KZ	South Kazakhstan Prov.	KZ37	Aksu Jabagly, alt. 1080-1830 m, South Kazakhstan Prov.			M	host: Mentha asiatica	1
BeeCAsia0010530	BeeCAsia 31	28/5/2017	ELKU	BeeCAsia	Halictus (Halictus) brunnescens	Animalia	Arthropoda	Insecta	Hymenoptera	Halictidae	Halictinae	Halictus	brunnescens		(Eversmann, 1852)	R. Murao	2012	O. Tadauchi	07/09/2002	KZ	South Kazakhstan Prov.	KZ37	Aksu Jabagly, alt. 1080-1830 m, South Kazakhstan Prov.			M	host: Tamarix sp.	1
BeeCAsia0010531	BeeCAsia 31	28/5/2017	ELKU	BeeCAsia	Halictus (Halictus) brunnescens	Animalia	Arthropoda	Insecta	Hymenoptera	Halictidae	Halictinae	Halictus	brunnescens		(Eversmann, 1852)	R. Murao	2012	O. Tadauchi	07/09/2002	KZ	South Kazakhstan Prov.	KZ37	Aksu Jabagly, alt. 1080-1830 m, South Kazakhstan Prov.			M	host: Chondrilla sp.	1
BeeCAsia0010532	BeeCAsia 31	28/5/2017	ELKU	BeeCAsia	Halictus (Halictus) brunnescens	Animalia	Arthropoda	Insecta	Hymenoptera	Halictidae	Halictinae	Halictus	brunnescens		(Eversmann, 1852)	R. Murao	2012	O. Tadauchi	07/09/2002	KZ	South Kazakhstan Prov.	KZ37	Aksu Jabagly, alt. 1080-1830 m, South Kazakhstan Prov.			M	host: Chondrilla sp.	1
BeeCAsia0010533	BeeCAsia 31	28/5/2017	ELKU	BeeCAsia	Halictus (Halictus) brunnescens	Animalia	Arthropoda	Insecta	Hymenoptera	Halictidae	Halictinae	Halictus	brunnescens		(Eversmann, 1852)	R. Murao	2012	O. Tadauchi	07/09/2002	KZ	South Kazakhstan Prov.	KZ37	Aksu Jabagly, alt. 1080-1830 m, South Kazakhstan Prov.			M	host: Chondrilla sp.	1
BeeCAsia0010526	BeeCAsia 31	28/5/2017	ELKU	BeeCAsia	Halictus (Halictus) brunnescens	Animalia	Arthropoda	Insecta	Hymenoptera	Halictidae	Halictinae	Halictus	brunnescens		(Eversmann, 1852)	R. Murao	2012	O. Tadauchi	04/09/2002	KZ	South Kazakhstan Prov.	KZ37	Aksu Jabagly, alt. 1080-1830 m, South Kazakhstan Prov.			M	host: Mentha asiatica	1
BeeCAsia0010527	BeeCAsia 31	28/5/2017	ELKU	BeeCAsia	Halictus (Halictus) brunnescens	Animalia	Arthropoda	Insecta	Hymenoptera	Halictidae	Halictinae	Halictus	brunnescens		(Eversmann, 1852)	R. Murao	2012	O. Tadauchi	04/09/2002	KZ	South Kazakhstan Prov.	KZ37	Aksu Jabagly, alt. 1080-1830 m, South Kazakhstan Prov.			M	host: Mentha asiatica	1
BeeCAsia0010528	BeeCAsia 31	28/5/2017	ELKU	BeeCAsia	Halictus (Halictus) brunnescens	Animalia	Arthropoda	Insecta	Hymenoptera	Halictidae	Halictinae	Halictus	brunnescens		(Eversmann, 1852)	R. Murao	2012	O. Tadauchi	04/09/2002	KZ	South Kazakhstan Prov.	KZ37	Aksu Jabagly, alt. 1080-1830 m, South Kazakhstan Prov.			M	host: Mentha asiatica	1
BeeCAsia0010529	BeeCAsia 31	28/5/2017	ELKU	BeeCAsia	Halictus (Halictus) brunnescens	Animalia	Arthropoda	Insecta	Hymenoptera	Halictidae	Halictinae	Halictus	brunnescens		(Eversmann, 1852)	R. Murao	2012	O. Tadauchi	04/09/2002	KZ	South Kazakhstan Prov.	KZ37	Aksu Jabagly, alt. 1080-1830 m, South Kazakhstan Prov.			M	host: Mentha asiatica	1
BeeCAsia0010534	BeeCAsia 31	28/5/2017	ELKU	BeeCAsia	Halictus (Halictus) brunnescens	Animalia	Arthropoda	Insecta	Hymenoptera	Halictidae	Halictinae	Halictus	brunnescens		(Eversmann, 1852)	R. Murao	2012	O. Tadauchi	04/09/2002	KZ	South Kazakhstan Prov.	KZ37	Aksu Jabagly, alt. 1080-1830 m, South Kazakhstan Prov.			M		1
BeeCAsia0009820	BeeCAsia 31	28/5/2017	ELKU	BeeCAsia	Halictus (Halictus) brunnescens	Animalia	Arthropoda	Insecta	Hymenoptera	Halictidae	Halictinae	Halictus	brunnescens		(Eversmann, 1852)	R. Murao	2012	O. Tadauchi	04/09/2002	KZ	South Kazakhstan Prov.	KZ37	Aksu Jabagly, alt. 1080-1830 m, South Kazakhstan Prov.			M	host: Aster canescens	1
BeeCAsia0009817	BeeCAsia 31	28/5/2017	ELKU	BeeCAsia	Halictus (Halictus) brunnescens	Animalia	Arthropoda	Insecta	Hymenoptera	Halictidae	Halictinae	Halictus	brunnescens		(Eversmann, 1852)	R. Murao	2012	O. Tadauchi	04/09/2002	KZ	South Kazakhstan Prov.	KZ37	Aksu Jabagly, alt. 1080-1830 m, South Kazakhstan Prov.			M		1
BeeCAsia0024569	BeeCAsia 42	28/5/2017	ELKU	BeeCAsia	Halictus (Seladonia) seladonius	Animalia	Arthropoda	Insecta	Hymenoptera	Halictidae	Halictinae	Halictus	seladonius		(Fabricius, 1794)	R. Murao	2012	O. Tadauchi	07/09/2002	KZ	South Kazakhstan Prov.	KZ37	Aksu Jabagly, alt. 1080-1830 m, South Kazakhstan Prov.			M		1
BeeCAsia0010560	BeeCAsia 39	28/5/2017	ELKU	BeeCAsia	Halictus (Hexataenites) resurgens	Animalia	Arthropoda	Insecta	Hymenoptera	Halictidae	Halictinae	Halictus	resurgens		Nurse, 1903	R. Murao	2012	O. Tadauchi	07/09/2002	KZ	South Kazakhstan Prov.	KZ37	Aksu Jabagly, alt. 1080-1830 m, South Kazakhstan Prov.			M	host: Chrysanthemum sp.	1
BeeCAsia0010535	BeeCAsia 31	28/5/2017	ELKU	BeeCAsia	Halictus (Halictus) brunnescens	Animalia	Arthropoda	Insecta	Hymenoptera	Halictidae	Halictinae	Halictus	brunnescens		(Eversmann, 1852)	R. Murao	2012	O. Tadauchi	04/09/2002	KZ	South Kazakhstan Prov.	KZ37	Aksu Jabagly, alt. 1080-1830 m, South Kazakhstan Prov.			M	host: Mentha asiatica	1
BeeCAsia0009808	BeeCAsia 31	28/5/2017	ELKU	BeeCAsia	Halictus (Halictus) brunnescens	Animalia	Arthropoda	Insecta	Hymenoptera	Halictidae	Halictinae	Halictus	brunnescens		(Eversmann, 1852)	R. Murao	2012	O. Tadauchi	04/09/2002	KZ	South Kazakhstan Prov.	KZ37	Aksu Jabagly, alt. 1080-1830 m, South Kazakhstan Prov.			M	host: Aster canescens	1
BeeCAsia0009824	BeeCAsia 31	28/5/2017	ELKU	BeeCAsia	Halictus (Halictus) brunnescens	Animalia	Arthropoda	Insecta	Hymenoptera	Halictidae	Halictinae	Halictus	brunnescens		(Eversmann, 1852)	R. Murao	2012	O. Tadauchi	04/09/2002	KZ	South Kazakhstan Prov.	KZ37	Aksu Jabagly, alt. 1080-1830 m, South Kazakhstan Prov.			M		1
BeeCAsia0010523	BeeCAsia 31	28/5/2017	ELKU	BeeCAsia	Halictus (Halictus) brunnescens	Animalia	Arthropoda	Insecta	Hymenoptera	Halictidae	Halictinae	Halictus	brunnescens		(Eversmann, 1852)	R. Murao	2012	O. Tadauchi	04/09/2002	KZ	South Kazakhstan Prov.	KZ37	Aksu Jabagly, alt. 1080-1830 m, South Kazakhstan Prov.			M		1
BeeCAsia0010524	BeeCAsia 31	28/5/2017	ELKU	BeeCAsia	Halictus (Halictus) brunnescens	Animalia	Arthropoda	Insecta	Hymenoptera	Halictidae	Halictinae	Halictus	brunnescens		(Eversmann, 1852)	R. Murao	2012	O. Tadauchi	04/09/2002	KZ	South Kazakhstan Prov.	KZ37	Aksu Jabagly, alt. 1080-1830 m, South Kazakhstan Prov.			M		1
BeeCAsia0010558	BeeCAsia 39	28/5/2017	ELKU	BeeCAsia	Halictus (Hexataenites) resurgens	Animalia	Arthropoda	Insecta	Hymenoptera	Halictidae	Halictinae	Halictus	resurgens		Nurse, 1903	R. Murao	2012	O. Tadauchi	04/09/2002	KZ	South Kazakhstan Prov.	KZ37	Aksu Jabagly, alt. 1080-1830 m, South Kazakhstan Prov.			M		1
BeeCAsia0010559	BeeCAsia 39	28/5/2017	ELKU	BeeCAsia	Halictus (Hexataenites) resurgens	Animalia	Arthropoda	Insecta	Hymenoptera	Halictidae	Halictinae	Halictus	resurgens		Nurse, 1903	R. Murao	2012	O. Tadauchi	04/09/2002	KZ	South Kazakhstan Prov.	KZ37	Aksu Jabagly, alt. 1080-1830 m, South Kazakhstan Prov.			M	host: Mentha asiatica	1
BeeCAsia0010562	BeeCAsia 39	28/5/2017	ELKU	BeeCAsia	Halictus (Hexataenites) resurgens	Animalia	Arthropoda	Insecta	Hymenoptera	Halictidae	Halictinae	Halictus	resurgens		Nurse, 1903	R. Murao	2012	O. Tadauchi	04/09/2002	KZ	South Kazakhstan Prov.	KZ37	Aksu Jabagly, alt. 1080-1830 m, South Kazakhstan Prov.			M	host: Mentha asiatica	1
BeeCAsia0010547	BeeCAsia 31	28/5/2017	ELKU	BeeCAsia	Halictus (Halictus) brunnescens	Animalia	Arthropoda	Insecta	Hymenoptera	Halictidae	Halictinae	Halictus	brunnescens		(Eversmann, 1852)	R. Murao	2012	R. Murao	04/09/2002	KZ	South Kazakhstan Prov.	KZ37	Aksu Jabagly, alt. 1080-1830 m, South Kazakhstan Prov.			M	host: Cichorium intybus	1
BeeCAsia0010604	BeeCAsia 39	28/5/2017	ELKU	BeeCAsia	Halictus (Hexataenites) resurgens	Animalia	Arthropoda	Insecta	Hymenoptera	Halictidae	Halictinae	Halictus	resurgens		Nurse, 1903	R. Murao	2012	R. Murao	04/09/2002	KZ	South Kazakhstan Prov.	KZ37	Aksu Jabagly, alt. 1080-1830 m, South Kazakhstan Prov.			M	host: Cichorium intybus	1
BeeCAsia0009929	BeeCAsia 32	28/5/2017	ELKU	BeeCAsia	Halictus (Tytthalictus) palustris	Animalia	Arthropoda	Insecta	Hymenoptera	Halictidae	Halictinae	Halictus	palustris		Morawitz, 1876	R. Murao	2012	O. Tadauchi	06/09/2002	KZ	South Kazakhstan Prov.	KZ38	Aksu Valley, Jabagly, alt. 130-560 m, South Kazakhstan Prov.			M	host: Cichorium intybus	1
BeeCAsia0009933	BeeCAsia 19	28/5/2017	ELKU	BeeCAsia	Halictus (Mucoreohalictus) mucidus	Animalia	Arthropoda	Insecta	Hymenoptera	Halictidae	Halictinae	Halictus	mucidus		Blüthgen, 1923	R. Murao	2012	O. Tadauchi	06/09/2002	KZ	South Kazakhstan Prov.	KZ38	Aksu Valley, Jabagly, alt. 130-560 m, South Kazakhstan Prov.			M	host: Cichorium intybus	1
BeeCAsia0010543	BeeCAsia 31	28/5/2017	ELKU	BeeCAsia	Halictus (Halictus) brunnescens	Animalia	Arthropoda	Insecta	Hymenoptera	Halictidae	Halictinae	Halictus	brunnescens		(Eversmann, 1852)	R. Murao	2012	O. Tadauchi	06/09/2002	KZ	South Kazakhstan Prov.	KZ38	Aksu Valley, Jabagly, alt. 130-560 m, South Kazakhstan Prov.			M	host: Cirsium sp.	1
BeeCAsia0010548	BeeCAsia 31	28/5/2017	ELKU	BeeCAsia	Halictus (Halictus) brunnescens	Animalia	Arthropoda	Insecta	Hymenoptera	Halictidae	Halictinae	Halictus	brunnescens		(Eversmann, 1852)	R. Murao	2012	O. Tadauchi	06/09/2002	KZ	South Kazakhstan Prov.	KZ38	Aksu Valley, Jabagly, alt. 130-560 m, South Kazakhstan Prov.			M	host: Cirsium sp.	1
BeeCAsia0010549	BeeCAsia 31	28/5/2017	ELKU	BeeCAsia	Halictus (Halictus) brunnescens	Animalia	Arthropoda	Insecta	Hymenoptera	Halictidae	Halictinae	Halictus	brunnescens		(Eversmann, 1852)	R. Murao	2012	O. Tadauchi	06/09/2002	KZ	South Kazakhstan Prov.	KZ38	Aksu Valley, Jabagly, alt. 130-560 m, South Kazakhstan Prov.			M	host: Chondrilla sp.	1
BeeCAsia0010540	BeeCAsia 31	28/5/2017	ELKU	BeeCAsia	Halictus (Halictus) brunnescens	Animalia	Arthropoda	Insecta	Hymenoptera	Halictidae	Halictinae	Halictus	brunnescens		(Eversmann, 1852)	R. Murao	2012	R. Murao	06/09/2002	KZ	South Kazakhstan Prov.	KZ38	Aksu Valley, Jabagly, alt. 130-560 m, South Kazakhstan Prov.			M	host: Cirsium sp.	1
BeeCAsia0009857	BeeCAsia 31	28/5/2017	ELKU	BeeCAsia	Halictus (Halictus) brunnescens	Animalia	Arthropoda	Insecta	Hymenoptera	Halictidae	Halictinae	Halictus	brunnescens		(Eversmann, 1852)	R. Murao	2012	O. Tadauchi	05/09/2002	KZ	South Kazakhstan Prov.	KZ66	Ulken-Kaindy, Jabagly, alt. 1090-2000 m, South Kazakhstan Prov.			M	host: Hibiscus sp.	1
BeeCAsia0010557	BeeCAsia 32	28/5/2017	ELKU	BeeCAsia	Halictus (Halictus) duplocinctus	Animalia	Arthropoda	Insecta	Hymenoptera	Halictidae	Halictinae	Halictus	duplocinctus		Vachal, 1902	R. Murao	2012	O. Tadauchi	05/09/2002	KZ	South Kazakhstan Prov.	KZ66	Ulken-Kaindy, Jabagly, alt. 1090-2000 m, South Kazakhstan Prov.			M	host: Mentha asiatica	1
BeeCAsia0010633	BeeCAsia 32	28/5/2017	ELKU	BeeCAsia	Halictus (Monilapis) compressus transvolgensis	Animalia	Arthropoda	Insecta	Hymenoptera	Halictidae	Halictinae	Halictus	compressus	transvolgensis	Pesenko, 1985	R. Murao	2012	O. Tadauchi	05/09/2002	KZ	South Kazakhstan Prov.	KZ66	Ulken-Kaindy, Jabagly, alt. 1090-2000 m, South Kazakhstan Prov.			M	host: Aster canescens	1
BeeCAsia0010634	BeeCAsia 32	28/5/2017	ELKU	BeeCAsia	Halictus (Monilapis) compressus transvolgensis	Animalia	Arthropoda	Insecta	Hymenoptera	Halictidae	Halictinae	Halictus	compressus	transvolgensis	Pesenko, 1985	R. Murao	2012	O. Tadauchi	05/09/2002	KZ	South Kazakhstan Prov.	KZ66	Ulken-Kaindy, Jabagly, alt. 1090-2000 m, South Kazakhstan Prov.			M	host: Chondrilla sp.	1
BeeCAsia0010541	BeeCAsia 31	28/5/2017	ELKU	BeeCAsia	Halictus (Halictus) brunnescens	Animalia	Arthropoda	Insecta	Hymenoptera	Halictidae	Halictinae	Halictus	brunnescens		(Eversmann, 1852)	R. Murao	2012	O. Tadauchi	08/09/2002	KZ	Jambyl Prov.	KZ21	East of Taraz, alt. 570-600 m, Jambyl Prov.	73.45	42.9833	M	host: Tamarix sp.	1
BeeCAsia0010550	BeeCAsia 31	28/5/2017	ELKU	BeeCAsia	Halictus (Halictus) brunnescens	Animalia	Arthropoda	Insecta	Hymenoptera	Halictidae	Halictinae	Halictus	brunnescens		(Eversmann, 1852)	R. Murao	2012	O. Tadauchi	08/09/2002	KZ	Jambyl Prov.	KZ21	East of Taraz, alt. 570-600 m, Jambyl Prov.	73.45	42.9833	M	host: Tamarix sp.	1
BeeCAsia0010542	BeeCAsia 31	28/5/2017	ELKU	BeeCAsia	Halictus (Halictus) brunnescens	Animalia	Arthropoda	Insecta	Hymenoptera	Halictidae	Halictinae	Halictus	brunnescens		(Eversmann, 1852)	R. Murao	2012	R. Miyanaga	02/09/2002	KZ	Almaty Prov.	KZ14	Chilik riverside, East of Almaty, Almaty Prov.			M	host: Tamarix ramosissima	1
BeeCAsia0010551	BeeCAsia 31	28/5/2017	ELKU	BeeCAsia	Halictus (Halictus) brunnescens	Animalia	Arthropoda	Insecta	Hymenoptera	Halictidae	Halictinae	Halictus	brunnescens		(Eversmann, 1852)	R. Murao	2012	R. Miyanaga	02/09/2002	KZ	Almaty Prov.	KZ14	Chilik riverside, East of Almaty, Almaty Prov.			M		1
BeeCAsia0009847	BeeCAsia 31	28/5/2017	ELKU	BeeCAsia	Halictus (Halictus) brunnescens	Animalia	Arthropoda	Insecta	Hymenoptera	Halictidae	Halictinae	Halictus	brunnescens		(Eversmann, 1852)	R. Murao	2012	R. Murao	05/09/2002	KZ	South Kazakhstan Prov.	KZ66	Ulken-Kaindy, Jabagly, alt. 1090-2000 m, South Kazakhstan Prov.			M		1
BeeCAsia0009849	BeeCAsia 31	28/5/2017	ELKU	BeeCAsia	Halictus (Halictus) brunnescens	Animalia	Arthropoda	Insecta	Hymenoptera	Halictidae	Halictinae	Halictus	brunnescens		(Eversmann, 1852)	R. Murao	2012	R. Murao	05/09/2002	KZ	South Kazakhstan Prov.	KZ66	Ulken-Kaindy, Jabagly, alt. 1090-2000 m, South Kazakhstan Prov.			M		1
BeeCAsia0010522	BeeCAsia 31	28/5/2017	ELKU	BeeCAsia	Halictus (Halictus) brunnescens	Animalia	Arthropoda	Insecta	Hymenoptera	Halictidae	Halictinae	Halictus	brunnescens		(Eversmann, 1852)	R. Murao	2012	O. Tadauchi	31/08/2002	KZ	Almaty	KZ1	Almaty city			M		1
BeeCAsia0011643	BeeCAsia 19	28/5/2017	ELKU	BeeCAsia	Halictus (Mucoreohalictus) mucoreus	Animalia	Arthropoda	Insecta	Hymenoptera	Halictidae	Halictinae	Halictus	mucoreus		Eversmann, 1852	R. Murao	2012	O. Tadauchi	28/05/2000	KG	Bishkek	KG1	Bishkek City			F	host: Brassica sp.	1
BeeCAsia0010520	BeeCAsia 31	28/5/2017	ELKU	BeeCAsia	Halictus (Halictus) brunnescens	Animalia	Arthropoda	Insecta	Hymenoptera	Halictidae	Halictinae	Halictus	brunnescens		(Eversmann, 1852)	R. Murao	2012	A. Dawut	25/08/2002	CN	Ili Prov.	CN10	Qingshuihe, alt. 780 m, Ili Prov., Xinjiang Uygur Aut. Reg.			M		1
BeeCAsia0010519	BeeCAsia 31	28/5/2017	ELKU	BeeCAsia	Halictus (Halictus) brunnescens	Animalia	Arthropoda	Insecta	Hymenoptera	Halictidae	Halictinae	Halictus	brunnescens		(Eversmann, 1852)	R. Murao	2012	R. Murao	27/08/2002	CN	Altay Prov.	CN2	Jeminay County, alt. 800-1050 m, Altay Prov., Xinjiang Uygur Aut. Reg.			M		1
BeeCAsia0010537	BeeCAsia 31	28/5/2017	ELKU	BeeCAsia	Halictus (Halictus) brunnescens	Animalia	Arthropoda	Insecta	Hymenoptera	Halictidae	Halictinae	Halictus	brunnescens		(Eversmann, 1852)	R. Murao	2012	R. Murao	27/08/2002	CN	Altay Prov.	CN2	Jeminay County, alt. 800-1050 m, Altay Prov., Xinjiang Uygur Aut. Reg.			M		1
BeeCAsia0010539	BeeCAsia 31	28/5/2017	ELKU	BeeCAsia	Halictus (Halictus) brunnescens	Animalia	Arthropoda	Insecta	Hymenoptera	Halictidae	Halictinae	Halictus	brunnescens		(Eversmann, 1852)	R. Murao	2012	O. Tadauchi	27/08/2002	CN	Altay Prov.	CN2	Jeminay County, alt. 800-1050 m, Altay Prov., Xinjiang Uygur Aut. Reg.			M		1
BeeCAsia0010553	BeeCAsia 32	28/5/2017	ELKU	BeeCAsia	Halictus (Halictus) quadricinctus	Animalia	Arthropoda	Insecta	Hymenoptera	Halictidae	Halictinae	Halictus	quadricinctus		(Fabricius, 1776)	R. Murao	2012	R. Murao	25/08/2002	CN	Ili Prov.	CN5	Guozigou, alt. 1230 m, Ili Prov., Xinjiang Uygur Aut. Reg.			M		1
BeeCAsia0010605	BeeCAsia 39	28/5/2017	ELKU	BeeCAsia	Halictus (Hexataenites) resurgens	Animalia	Arthropoda	Insecta	Hymenoptera	Halictidae	Halictinae	Halictus	resurgens		Nurse, 1903	R. Murao	2012	O. Tadauchi	31/08/2002	KZ	Almaty	KZ1	Almaty city			M		1
BeeCAsia0010606	BeeCAsia 39	28/5/2017	ELKU	BeeCAsia	Halictus (Hexataenites) resurgens	Animalia	Arthropoda	Insecta	Hymenoptera	Halictidae	Halictinae	Halictus	resurgens		Nurse, 1903	R. Murao	2012	O. Tadauchi	31/08/2002	KZ	Almaty	KZ1	Almaty city			M		1
BeeCAsia0010607	BeeCAsia 39	28/5/2017	ELKU	BeeCAsia	Halictus (Hexataenites) resurgens	Animalia	Arthropoda	Insecta	Hymenoptera	Halictidae	Halictinae	Halictus	resurgens		Nurse, 1903	R. Murao	2012	O. Tadauchi	31/08/2002	KZ	Almaty	KZ1	Almaty city			M		1
BeeCAsia0010608	BeeCAsia 39	28/5/2017	ELKU	BeeCAsia	Halictus (Hexataenites) resurgens	Animalia	Arthropoda	Insecta	Hymenoptera	Halictidae	Halictinae	Halictus	resurgens		Nurse, 1903	R. Murao	2012	O. Tadauchi	31/08/2002	KZ	Almaty	KZ1	Almaty city			M		1
BeeCAsia0010561	BeeCAsia 39	28/5/2017	ELKU	BeeCAsia	Halictus (Hexataenites) resurgens	Animalia	Arthropoda	Insecta	Hymenoptera	Halictidae	Halictinae	Halictus	resurgens		Nurse, 1903	R. Murao	2012	O. Tadauchi	06/09/2002	KZ	South Kazakhstan Prov.	KZ38	Aksu Valley, Jabagly, alt. 130-560 m, South Kazakhstan Prov.			M	host: Cichorium intybus	1
BeeCAsia0010616	BeeCAsia 32	28/5/2017	ELKU	BeeCAsia	Halictus (Monilapis) compressus transvolgensis	Animalia	Arthropoda	Insecta	Hymenoptera	Halictidae	Halictinae	Halictus	compressus	transvolgensis	Pesenko, 1985	R. Murao	2012	O. Tadauchi	06/09/2002	KZ	South Kazakhstan Prov.	KZ38	Aksu Valley, Jabagly, alt. 130-560 m, South Kazakhstan Prov.			M	host: Cichorium intybus	1
BeeCAsia0010708	BeeCAsia 32	28/5/2017	ELKU	BeeCAsia	Halictus (Platyhalictus) minor	Animalia	Arthropoda	Insecta	Hymenoptera	Halictidae	Halictinae	Halictus	minor		Morawitz, 1876	R. Murao	2012	O. Tadauchi	06/09/2002	KZ	South Kazakhstan Prov.	KZ38	Aksu Valley, Jabagly, alt. 130-560 m, South Kazakhstan Prov.			M	host: Cichorium intybus	1
BeeCAsia0024572	BeeCAsia 42	28/5/2017	ELKU	BeeCAsia	Halictus (Seladonia) seladonius	Animalia	Arthropoda	Insecta	Hymenoptera	Halictidae	Halictinae	Halictus	seladonius		(Fabricius, 1794)	R. Murao	2012	O. Tadauchi	06/09/2002	KZ	South Kazakhstan Prov.	KZ38	Aksu Valley, Jabagly, alt. 130-560 m, South Kazakhstan Prov.			M	host: Chondrilla sp.	1
BeeCAsia0010672	BeeCAsia 32	28/5/2017	ELKU	BeeCAsia	Halictus (Tytthalictus) palustris	Animalia	Arthropoda	Insecta	Hymenoptera	Halictidae	Halictinae	Halictus	palustris		Morawitz, 1876	R. Murao	2012	O. Tadauchi	16/06/2003	KZ	South Kazakhstan Prov.	KZ38	Aksu Valley, Jabagly, alt. 130-560 m, South Kazakhstan Prov.			M		1
BeeCAsia0010666	BeeCAsia 32	28/5/2017	ELKU	BeeCAsia	Halictus (Tytthalictus) palustris	Animalia	Arthropoda	Insecta	Hymenoptera	Halictidae	Halictinae	Halictus	palustris		Morawitz, 1876	R. Murao	2012	O. Tadauchi	16/06/2003	KZ	South Kazakhstan Prov.	KZ38	Aksu Valley, Jabagly, alt. 130-560 m, South Kazakhstan Prov.			M		1
BeeCAsia0010662	BeeCAsia 32	28/5/2017	ELKU	BeeCAsia	Halictus (Tytthalictus) palustris	Animalia	Arthropoda	Insecta	Hymenoptera	Halictidae	Halictinae	Halictus	palustris		Morawitz, 1876	R. Murao	2012	K. Mitai	16/06/2003	KZ	South Kazakhstan Prov.	KZ38	Aksu Valley, Jabagly, alt. 130-560 m, South Kazakhstan Prov.			M		1
BeeCAsia0009939	BeeCAsia 19	28/5/2017	ELKU	BeeCAsia	Halictus (Seladonia) transbaikalensis	Animalia	Arthropoda	Insecta	Hymenoptera	Halictidae	Halictinae	Halictus	transbaikalensis		Blüthgen, 1933	R. Murao	2012	O. Tadauchi	01/09/2002	KZ	Almaty Prov.	KZ13	Big Almaty Lake, alt. 1230-2050 m, Almaty Prov.			M		1
BeeCAsia0010617	BeeCAsia 32	28/5/2017	ELKU	BeeCAsia	Halictus (Monilapis) compressus transvolgensis	Animalia	Arthropoda	Insecta	Hymenoptera	Halictidae	Halictinae	Halictus	compressus	transvolgensis	Pesenko, 1985	R. Murao	2012	O. Tadauchi	01/09/2002	KZ	Almaty Prov.	KZ13	Big Almaty Lake, alt. 1230-2050 m, Almaty Prov.			M		1
BeeCAsia0010618	BeeCAsia 32	28/5/2017	ELKU	BeeCAsia	Halictus (Monilapis) compressus transvolgensis	Animalia	Arthropoda	Insecta	Hymenoptera	Halictidae	Halictinae	Halictus	compressus	transvolgensis	Pesenko, 1985	R. Murao	2012	O. Tadauchi	01/09/2002	KZ	Almaty Prov.	KZ13	Big Almaty Lake, alt. 1230-2050 m, Almaty Prov.			M		1
BeeCAsia0010619	BeeCAsia 32	28/5/2017	ELKU	BeeCAsia	Halictus (Monilapis) compressus transvolgensis	Animalia	Arthropoda	Insecta	Hymenoptera	Halictidae	Halictinae	Halictus	compressus	transvolgensis	Pesenko, 1985	R. Murao	2012	O. Tadauchi	01/09/2002	KZ	Almaty Prov.	KZ13	Big Almaty Lake, alt. 1230-2050 m, Almaty Prov.			M		1
BeeCAsia0010620	BeeCAsia 32	28/5/2017	ELKU	BeeCAsia	Halictus (Monilapis) compressus transvolgensis	Animalia	Arthropoda	Insecta	Hymenoptera	Halictidae	Halictinae	Halictus	compressus	transvolgensis	Pesenko, 1985	R. Murao	2012	O. Tadauchi	01/09/2002	KZ	Almaty Prov.	KZ13	Big Almaty Lake, alt. 1230-2050 m, Almaty Prov.			M		1
BeeCAsia0010621	BeeCAsia 32	28/5/2017	ELKU	BeeCAsia	Halictus (Monilapis) compressus transvolgensis	Animalia	Arthropoda	Insecta	Hymenoptera	Halictidae	Halictinae	Halictus	compressus	transvolgensis	Pesenko, 1985	R. Murao	2012	O. Tadauchi	01/09/2002	KZ	Almaty Prov.	KZ13	Big Almaty Lake, alt. 1230-2050 m, Almaty Prov.			M		1
BeeCAsia0010622	BeeCAsia 32	28/5/2017	ELKU	BeeCAsia	Halictus (Monilapis) compressus transvolgensis	Animalia	Arthropoda	Insecta	Hymenoptera	Halictidae	Halictinae	Halictus	compressus	transvolgensis	Pesenko, 1985	R. Murao	2012	O. Tadauchi	01/09/2002	KZ	Almaty Prov.	KZ13	Big Almaty Lake, alt. 1230-2050 m, Almaty Prov.			M		1
BeeCAsia0010623	BeeCAsia 32	28/5/2017	ELKU	BeeCAsia	Halictus (Monilapis) compressus transvolgensis	Animalia	Arthropoda	Insecta	Hymenoptera	Halictidae	Halictinae	Halictus	compressus	transvolgensis	Pesenko, 1985	R. Murao	2012	O. Tadauchi	01/09/2002	KZ	Almaty Prov.	KZ13	Big Almaty Lake, alt. 1230-2050 m, Almaty Prov.			M		1
BeeCAsia0010624	BeeCAsia 32	28/5/2017	ELKU	BeeCAsia	Halictus (Monilapis) compressus transvolgensis	Animalia	Arthropoda	Insecta	Hymenoptera	Halictidae	Halictinae	Halictus	compressus	transvolgensis	Pesenko, 1985	R. Murao	2012	O. Tadauchi	01/09/2002	KZ	Almaty Prov.	KZ13	Big Almaty Lake, alt. 1230-2050 m, Almaty Prov.			M		1
BeeCAsia0010671	BeeCAsia 32	28/5/2017	ELKU	BeeCAsia	Halictus (Tytthalictus) palustris	Animalia	Arthropoda	Insecta	Hymenoptera	Halictidae	Halictinae	Halictus	palustris		Morawitz, 1876	R. Murao	2012	O. Tadauchi	28/08/2004	KZ	Almaty Prov.	KZ13	Big Almaty Lake, alt. 1230-2050 m, Almaty Prov.			M		1
BeeCAsia0010673	BeeCAsia 32	28/5/2017	ELKU	BeeCAsia	Halictus (Tytthalictus) palustris	Animalia	Arthropoda	Insecta	Hymenoptera	Halictidae	Halictinae	Halictus	palustris		Morawitz, 1876	R. Murao	2012	O. Tadauchi	28/08/2004	KZ	Almaty Prov.	KZ13	Big Almaty Lake, alt. 1230-2050 m, Almaty Prov.			M		1
BeeCAsia0010674	BeeCAsia 32	28/5/2017	ELKU	BeeCAsia	Halictus (Tytthalictus) palustris	Animalia	Arthropoda	Insecta	Hymenoptera	Halictidae	Halictinae	Halictus	palustris		Morawitz, 1876	R. Murao	2012	O. Tadauchi	28/08/2004	KZ	Almaty Prov.	KZ13	Big Almaty Lake, alt. 1230-2050 m, Almaty Prov.			M		1
BeeCAsia0010675	BeeCAsia 32	28/5/2017	ELKU	BeeCAsia	Halictus (Tytthalictus) palustris	Animalia	Arthropoda	Insecta	Hymenoptera	Halictidae	Halictinae	Halictus	palustris		Morawitz, 1876	R. Murao	2012	O. Tadauchi	28/08/2004	KZ	Almaty Prov.	KZ13	Big Almaty Lake, alt. 1230-2050 m, Almaty Prov.			M		1
BeeCAsia0010676	BeeCAsia 32	28/5/2017	ELKU	BeeCAsia	Halictus (Tytthalictus) palustris	Animalia	Arthropoda	Insecta	Hymenoptera	Halictidae	Halictinae	Halictus	palustris		Morawitz, 1876	R. Murao	2012	O. Tadauchi	28/08/2004	KZ	Almaty Prov.	KZ13	Big Almaty Lake, alt. 1230-2050 m, Almaty Prov.			M		1
BeeCAsia0010677	BeeCAsia 32	28/5/2017	ELKU	BeeCAsia	Halictus (Tytthalictus) palustris	Animalia	Arthropoda	Insecta	Hymenoptera	Halictidae	Halictinae	Halictus	palustris		Morawitz, 1876	R. Murao	2012	O. Tadauchi	28/08/2004	KZ	Almaty Prov.	KZ13	Big Almaty Lake, alt. 1230-2050 m, Almaty Prov.			M		1
BeeCAsia0010678	BeeCAsia 32	28/5/2017	ELKU	BeeCAsia	Halictus (Tytthalictus) palustris	Animalia	Arthropoda	Insecta	Hymenoptera	Halictidae	Halictinae	Halictus	palustris		Morawitz, 1876	R. Murao	2012	O. Tadauchi	28/08/2004	KZ	Almaty Prov.	KZ13	Big Almaty Lake, alt. 1230-2050 m, Almaty Prov.			M		1
BeeCAsia0010679	BeeCAsia 32	28/5/2017	ELKU	BeeCAsia	Halictus (Tytthalictus) palustris	Animalia	Arthropoda	Insecta	Hymenoptera	Halictidae	Halictinae	Halictus	palustris		Morawitz, 1876	R. Murao	2012	O. Tadauchi	28/08/2004	KZ	Almaty Prov.	KZ13	Big Almaty Lake, alt. 1230-2050 m, Almaty Prov.			M		1
BeeCAsia0010680	BeeCAsia 32	28/5/2017	ELKU	BeeCAsia	Halictus (Tytthalictus) palustris	Animalia	Arthropoda	Insecta	Hymenoptera	Halictidae	Halictinae	Halictus	palustris		Morawitz, 1876	R. Murao	2012	O. Tadauchi	28/08/2004	KZ	Almaty Prov.	KZ13	Big Almaty Lake, alt. 1230-2050 m, Almaty Prov.			M		1
BeeCAsia0010681	BeeCAsia 32	28/5/2017	ELKU	BeeCAsia	Halictus (Tytthalictus) palustris	Animalia	Arthropoda	Insecta	Hymenoptera	Halictidae	Halictinae	Halictus	palustris		Morawitz, 1876	R. Murao	2012	O. Tadauchi	28/08/2004	KZ	Almaty Prov.	KZ13	Big Almaty Lake, alt. 1230-2050 m, Almaty Prov.			M		1
BeeCAsia0010682	BeeCAsia 32	28/5/2017	ELKU	BeeCAsia	Halictus (Tytthalictus) palustris	Animalia	Arthropoda	Insecta	Hymenoptera	Halictidae	Halictinae	Halictus	palustris		Morawitz, 1876	R. Murao	2012	O. Tadauchi	28/08/2004	KZ	Almaty Prov.	KZ13	Big Almaty Lake, alt. 1230-2050 m, Almaty Prov.			M		1
BeeCAsia0010683	BeeCAsia 32	28/5/2017	ELKU	BeeCAsia	Halictus (Tytthalictus) palustris	Animalia	Arthropoda	Insecta	Hymenoptera	Halictidae	Halictinae	Halictus	palustris		Morawitz, 1876	R. Murao	2012	O. Tadauchi	28/08/2004	KZ	Almaty Prov.	KZ13	Big Almaty Lake, alt. 1230-2050 m, Almaty Prov.			M		1
BeeCAsia0010684	BeeCAsia 32	28/5/2017	ELKU	BeeCAsia	Halictus (Tytthalictus) palustris	Animalia	Arthropoda	Insecta	Hymenoptera	Halictidae	Halictinae	Halictus	palustris		Morawitz, 1876	R. Murao	2012	O. Tadauchi	28/08/2004	KZ	Almaty Prov.	KZ13	Big Almaty Lake, alt. 1230-2050 m, Almaty Prov.			M		1
BeeCAsia0010685	BeeCAsia 32	28/5/2017	ELKU	BeeCAsia	Halictus (Tytthalictus) palustris	Animalia	Arthropoda	Insecta	Hymenoptera	Halictidae	Halictinae	Halictus	palustris		Morawitz, 1876	R. Murao	2012	O. Tadauchi	28/08/2004	KZ	Almaty Prov.	KZ13	Big Almaty Lake, alt. 1230-2050 m, Almaty Prov.			M		1
BeeCAsia0010686	BeeCAsia 32	28/5/2017	ELKU	BeeCAsia	Halictus (Tytthalictus) palustris	Animalia	Arthropoda	Insecta	Hymenoptera	Halictidae	Halictinae	Halictus	palustris		Morawitz, 1876	R. Murao	2012	O. Tadauchi	28/08/2004	KZ	Almaty Prov.	KZ13	Big Almaty Lake, alt. 1230-2050 m, Almaty Prov.			M		1
BeeCAsia0010687	BeeCAsia 32	28/5/2017	ELKU	BeeCAsia	Halictus (Tytthalictus) palustris	Animalia	Arthropoda	Insecta	Hymenoptera	Halictidae	Halictinae	Halictus	palustris		Morawitz, 1876	R. Murao	2012	O. Tadauchi	28/08/2004	KZ	Almaty Prov.	KZ13	Big Almaty Lake, alt. 1230-2050 m, Almaty Prov.			M		1
BeeCAsia0010689	BeeCAsia 32	28/5/2017	ELKU	BeeCAsia	Halictus (Tytthalictus) palustris	Animalia	Arthropoda	Insecta	Hymenoptera	Halictidae	Halictinae	Halictus	palustris		Morawitz, 1876	R. Murao	2012	O. Tadauchi	28/08/2004	KZ	Almaty Prov.	KZ13	Big Almaty Lake, alt. 1230-2050 m, Almaty Prov.			M		1
BeeCAsia0010609	BeeCAsia 39	28/5/2017	ELKU	BeeCAsia	Halictus (Hexataenites) resurgens	Animalia	Arthropoda	Insecta	Hymenoptera	Halictidae	Halictinae	Halictus	resurgens		Nurse, 1903	R. Murao	2012	R. Miyanaga	01/09/2002	KZ	Almaty Prov.	KZ13	Big Almaty Lake, alt. 1230-2050 m, Almaty Prov.			M		1
BeeCAsia0010663	BeeCAsia 32	28/5/2017	ELKU	BeeCAsia	Halictus (Tytthalictus) palustris	Animalia	Arthropoda	Insecta	Hymenoptera	Halictidae	Halictinae	Halictus	palustris		Morawitz, 1876	R. Murao	2012	R. Miyanaga	01/09/2002	KZ	Almaty Prov.	KZ13	Big Almaty Lake, alt. 1230-2050 m, Almaty Prov.			M		1
BeeCAsia0010631	BeeCAsia 32	28/5/2017	ELKU	BeeCAsia	Halictus (Monilapis) compressus transvolgensis	Animalia	Arthropoda	Insecta	Hymenoptera	Halictidae	Halictinae	Halictus	compressus	transvolgensis	Pesenko, 1985	R. Murao	2012	R. Murao	01/09/2002	KZ	Almaty Prov.	KZ13	Big Almaty Lake, alt. 1230-2050 m, Almaty Prov.			M	host: Chondrilla sp.	1
BeeCAsia0010632	BeeCAsia 32	28/5/2017	ELKU	BeeCAsia	Halictus (Monilapis) compressus transvolgensis	Animalia	Arthropoda	Insecta	Hymenoptera	Halictidae	Halictinae	Halictus	compressus	transvolgensis	Pesenko, 1985	R. Murao	2012	R. Murao	01/09/2002	KZ	Almaty Prov.	KZ13	Big Almaty Lake, alt. 1230-2050 m, Almaty Prov.			M	host: Chondrilla sp.	1
BeeCAsia0010652	BeeCAsia 32	28/5/2017	ELKU	BeeCAsia	Halictus (Tytthalictus) palustris	Animalia	Arthropoda	Insecta	Hymenoptera	Halictidae	Halictinae	Halictus	palustris		Morawitz, 1876	R. Murao	2012	R. Murao	01/09/2002	KZ	Almaty Prov.	KZ13	Big Almaty Lake, alt. 1230-2050 m, Almaty Prov.			M	host: Labiatae sp.	1
BeeCAsia0010653	BeeCAsia 32	28/5/2017	ELKU	BeeCAsia	Halictus (Tytthalictus) palustris	Animalia	Arthropoda	Insecta	Hymenoptera	Halictidae	Halictinae	Halictus	palustris		Morawitz, 1876	R. Murao	2012	R. Murao	01/09/2002	KZ	Almaty Prov.	KZ13	Big Almaty Lake, alt. 1230-2050 m, Almaty Prov.			M	host: Labiatae sp.	1
BeeCAsia0010654	BeeCAsia 32	28/5/2017	ELKU	BeeCAsia	Halictus (Tytthalictus) palustris	Animalia	Arthropoda	Insecta	Hymenoptera	Halictidae	Halictinae	Halictus	palustris		Morawitz, 1876	R. Murao	2012	R. Murao	01/09/2002	KZ	Almaty Prov.	KZ13	Big Almaty Lake, alt. 1230-2050 m, Almaty Prov.			M	host: Labiatae sp.	1
BeeCAsia0010655	BeeCAsia 32	28/5/2017	ELKU	BeeCAsia	Halictus (Tytthalictus) palustris	Animalia	Arthropoda	Insecta	Hymenoptera	Halictidae	Halictinae	Halictus	palustris		Morawitz, 1876	R. Murao	2012	R. Murao	01/09/2002	KZ	Almaty Prov.	KZ13	Big Almaty Lake, alt. 1230-2050 m, Almaty Prov.			M	host: Umbelliferae sp.	1
BeeCAsia0010688	BeeCAsia 32	28/5/2017	ELKU	BeeCAsia	Halictus (Tytthalictus) palustris	Animalia	Arthropoda	Insecta	Hymenoptera	Halictidae	Halictinae	Halictus	palustris		Morawitz, 1876	R. Murao	2012	R. Murao	01/09/2002	KZ	Almaty Prov.	KZ13	Big Almaty Lake, alt. 1230-2050 m, Almaty Prov.			M	host: Umbelliferae sp.	1
BeeCAsia0009940	BeeCAsia 19	28/5/2017	ELKU	BeeCAsia	Halictus (Seladonia) transbaikalensis	Animalia	Arthropoda	Insecta	Hymenoptera	Halictidae	Halictinae	Halictus	transbaikalensis		Blüthgen, 1933	R. Murao	2012	R. Murao	01/09/2002	KZ	Almaty Prov.	KZ13	Big Almaty Lake, alt. 1230-2050 m, Almaty Prov.			M		1
BeeCAsia0010536	BeeCAsia 31	28/5/2017	ELKU	BeeCAsia	Halictus (Halictus) brunnescens	Animalia	Arthropoda	Insecta	Hymenoptera	Halictidae	Halictinae	Halictus	brunnescens		(Eversmann, 1852)	R. Murao	2012	O. Tadauchi	04/09/2002	KZ	South Kazakhstan Prov.	KZ37	Aksu Jabagly, alt. 1080-1830 m, South Kazakhstan Prov.			M	host: Mentha asiatica	1
BeeCAsia0010552	BeeCAsia 31	28/5/2017	ELKU	BeeCAsia	Halictus (Halictus) brunnescens	Animalia	Arthropoda	Insecta	Hymenoptera	Halictidae	Halictinae	Halictus	brunnescens		(Eversmann, 1852)	R. Murao	2012	O. Tadauchi	04/09/2002	KZ	South Kazakhstan Prov.	KZ37	Aksu Jabagly, alt. 1080-1830 m, South Kazakhstan Prov.			M	host: Mentha asiatica	1
BeeCAsia0010564	BeeCAsia 39	28/5/2017	ELKU	BeeCAsia	Halictus (Hexataenites) resurgens	Animalia	Arthropoda	Insecta	Hymenoptera	Halictidae	Halictinae	Halictus	resurgens		Nurse, 1903	R. Murao	2012	O. Tadauchi	04/09/2002	KZ	South Kazakhstan Prov.	KZ37	Aksu Jabagly, alt. 1080-1830 m, South Kazakhstan Prov.			M	host: Mentha asiatica	1
BeeCAsia0010565	BeeCAsia 39	28/5/2017	ELKU	BeeCAsia	Halictus (Hexataenites) resurgens	Animalia	Arthropoda	Insecta	Hymenoptera	Halictidae	Halictinae	Halictus	resurgens		Nurse, 1903	R. Murao	2012	O. Tadauchi	04/09/2002	KZ	South Kazakhstan Prov.	KZ37	Aksu Jabagly, alt. 1080-1830 m, South Kazakhstan Prov.			M	host: Mentha asiatica	1
BeeCAsia0010575	BeeCAsia 39	28/5/2017	ELKU	BeeCAsia	Halictus (Hexataenites) resurgens	Animalia	Arthropoda	Insecta	Hymenoptera	Halictidae	Halictinae	Halictus	resurgens		Nurse, 1903	R. Murao	2012	O. Tadauchi	04/09/2002	KZ	South Kazakhstan Prov.	KZ37	Aksu Jabagly, alt. 1080-1830 m, South Kazakhstan Prov.			M	host: Mentha asiatica	1
BeeCAsia0009797	BeeCAsia 31	28/5/2017	ELKU	BeeCAsia	Halictus (Halictus) brunnescens	Animalia	Arthropoda	Insecta	Hymenoptera	Halictidae	Halictinae	Halictus	brunnescens		(Eversmann, 1852)	R. Murao	2012	R. Murao	04/09/2002	KZ	South Kazakhstan Prov.	KZ37	Aksu Jabagly, alt. 1080-1830 m, South Kazakhstan Prov.			M	host: Mentha asiatica	1
BeeCAsia0009920	BeeCAsia 32	28/5/2017	ELKU	BeeCAsia	Halictus (Argalictus) tibialis	Animalia	Arthropoda	Insecta	Hymenoptera	Halictidae	Halictinae	Halictus	tibialis		Walker, 1871	R. Murao	2012	R. Murao	04/09/2002	KZ	South Kazakhstan Prov.	KZ37	Aksu Jabagly, alt. 1080-1830 m, South Kazakhstan Prov.			M	host: Mentha asiatica	1
BeeCAsia0010628	BeeCAsia 32	28/5/2017	ELKU	BeeCAsia	Halictus (Monilapis) compressus transvolgensis	Animalia	Arthropoda	Insecta	Hymenoptera	Halictidae	Halictinae	Halictus	compressus	transvolgensis	Pesenko, 1985	R. Murao	2012	R. Murao	04/09/2002	KZ	South Kazakhstan Prov.	KZ37	Aksu Jabagly, alt. 1080-1830 m, South Kazakhstan Prov.			M	host: Mentha asiatica	1
BeeCAsia0010629	BeeCAsia 32	28/5/2017	ELKU	BeeCAsia	Halictus (Monilapis) compressus transvolgensis	Animalia	Arthropoda	Insecta	Hymenoptera	Halictidae	Halictinae	Halictus	compressus	transvolgensis	Pesenko, 1985	R. Murao	2012	R. Murao	04/09/2002	KZ	South Kazakhstan Prov.	KZ37	Aksu Jabagly, alt. 1080-1830 m, South Kazakhstan Prov.			M	host: Mentha asiatica	1
BeeCAsia0010567	BeeCAsia 39	28/5/2017	ELKU	BeeCAsia	Halictus (Hexataenites) resurgens	Animalia	Arthropoda	Insecta	Hymenoptera	Halictidae	Halictinae	Halictus	resurgens		Nurse, 1903	R. Murao	2012	O. Tadauchi	07/09/2002	KZ	South Kazakhstan Prov.	KZ37	Aksu Jabagly, alt. 1080-1830 m, South Kazakhstan Prov.			M	host: Chondrilla sp.	1
BeeCAsia0010568	BeeCAsia 39	28/5/2017	ELKU	BeeCAsia	Halictus (Hexataenites) resurgens	Animalia	Arthropoda	Insecta	Hymenoptera	Halictidae	Halictinae	Halictus	resurgens		Nurse, 1903	R. Murao	2012	O. Tadauchi	07/09/2002	KZ	South Kazakhstan Prov.	KZ37	Aksu Jabagly, alt. 1080-1830 m, South Kazakhstan Prov.			M	host: Chondrilla sp.	1
BeeCAsia0010569	BeeCAsia 39	28/5/2017	ELKU	BeeCAsia	Halictus (Hexataenites) resurgens	Animalia	Arthropoda	Insecta	Hymenoptera	Halictidae	Halictinae	Halictus	resurgens		Nurse, 1903	R. Murao	2012	O. Tadauchi	07/09/2002	KZ	South Kazakhstan Prov.	KZ37	Aksu Jabagly, alt. 1080-1830 m, South Kazakhstan Prov.			M	host: Chondrilla sp.	1
BeeCAsia0010590	BeeCAsia 39	28/5/2017	ELKU	BeeCAsia	Halictus (Hexataenites) resurgens	Animalia	Arthropoda	Insecta	Hymenoptera	Halictidae	Halictinae	Halictus	resurgens		Nurse, 1903	R. Murao	2012	O. Tadauchi	07/09/2002	KZ	South Kazakhstan Prov.	KZ37	Aksu Jabagly, alt. 1080-1830 m, South Kazakhstan Prov.			M	host: Chondrilla sp.	1
BeeCAsia0010591	BeeCAsia 39	28/5/2017	ELKU	BeeCAsia	Halictus (Hexataenites) resurgens	Animalia	Arthropoda	Insecta	Hymenoptera	Halictidae	Halictinae	Halictus	resurgens		Nurse, 1903	R. Murao	2012	O. Tadauchi	07/09/2002	KZ	South Kazakhstan Prov.	KZ37	Aksu Jabagly, alt. 1080-1830 m, South Kazakhstan Prov.			M	host: Chondrilla sp.	1
BeeCAsia0010592	BeeCAsia 39	28/5/2017	ELKU	BeeCAsia	Halictus (Hexataenites) resurgens	Animalia	Arthropoda	Insecta	Hymenoptera	Halictidae	Halictinae	Halictus	resurgens		Nurse, 1903	R. Murao	2012	O. Tadauchi	07/09/2002	KZ	South Kazakhstan Prov.	KZ37	Aksu Jabagly, alt. 1080-1830 m, South Kazakhstan Prov.			M	host: Chondrilla sp.	1
BeeCAsia0010593	BeeCAsia 39	28/5/2017	ELKU	BeeCAsia	Halictus (Hexataenites) resurgens	Animalia	Arthropoda	Insecta	Hymenoptera	Halictidae	Halictinae	Halictus	resurgens		Nurse, 1903	R. Murao	2012	O. Tadauchi	07/09/2002	KZ	South Kazakhstan Prov.	KZ37	Aksu Jabagly, alt. 1080-1830 m, South Kazakhstan Prov.			M	host: Chondrilla sp.	1
BeeCAsia0010594	BeeCAsia 39	28/5/2017	ELKU	BeeCAsia	Halictus (Hexataenites) resurgens	Animalia	Arthropoda	Insecta	Hymenoptera	Halictidae	Halictinae	Halictus	resurgens		Nurse, 1903	R. Murao	2012	O. Tadauchi	07/09/2002	KZ	South Kazakhstan Prov.	KZ37	Aksu Jabagly, alt. 1080-1830 m, South Kazakhstan Prov.			M	host: Chondrilla sp.	1
BeeCAsia0010595	BeeCAsia 39	28/5/2017	ELKU	BeeCAsia	Halictus (Hexataenites) resurgens	Animalia	Arthropoda	Insecta	Hymenoptera	Halictidae	Halictinae	Halictus	resurgens		Nurse, 1903	R. Murao	2012	O. Tadauchi	07/09/2002	KZ	South Kazakhstan Prov.	KZ37	Aksu Jabagly, alt. 1080-1830 m, South Kazakhstan Prov.			M	host: Chondrilla sp.	1
BeeCAsia0010596	BeeCAsia 39	28/5/2017	ELKU	BeeCAsia	Halictus (Hexataenites) resurgens	Animalia	Arthropoda	Insecta	Hymenoptera	Halictidae	Halictinae	Halictus	resurgens		Nurse, 1903	R. Murao	2012	O. Tadauchi	07/09/2002	KZ	South Kazakhstan Prov.	KZ37	Aksu Jabagly, alt. 1080-1830 m, South Kazakhstan Prov.			M	host: Tamarix sp.	1
BeeCAsia0010597	BeeCAsia 39	28/5/2017	ELKU	BeeCAsia	Halictus (Hexataenites) resurgens	Animalia	Arthropoda	Insecta	Hymenoptera	Halictidae	Halictinae	Halictus	resurgens		Nurse, 1903	R. Murao	2012	O. Tadauchi	07/09/2002	KZ	South Kazakhstan Prov.	KZ37	Aksu Jabagly, alt. 1080-1830 m, South Kazakhstan Prov.			M	host: Chondrilla sp.	1
BeeCAsia0009800	BeeCAsia 31	28/5/2017	ELKU	BeeCAsia	Halictus (Halictus) brunnescens	Animalia	Arthropoda	Insecta	Hymenoptera	Halictidae	Halictinae	Halictus	brunnescens		(Eversmann, 1852)	R. Murao	2012	R. Murao	07/09/2002	KZ	South Kazakhstan Prov.	KZ37	Aksu Jabagly, alt. 1080-1830 m, South Kazakhstan Prov.			M	host: Chondrilla sp.	1
BeeCAsia0010563	BeeCAsia 39	28/5/2017	ELKU	BeeCAsia	Halictus (Hexataenites) resurgens	Animalia	Arthropoda	Insecta	Hymenoptera	Halictidae	Halictinae	Halictus	resurgens		Nurse, 1903	R. Murao	2012	O. Tadauchi	04/09/2002	KZ	South Kazakhstan Prov.	KZ37	Aksu Jabagly, alt. 1080-1830 m, South Kazakhstan Prov.			M	host: Mentha asiatica	1
BeeCAsia0010570	BeeCAsia 39	28/5/2017	ELKU	BeeCAsia	Halictus (Hexataenites) resurgens	Animalia	Arthropoda	Insecta	Hymenoptera	Halictidae	Halictinae	Halictus	resurgens		Nurse, 1903	R. Murao	2012	O. Tadauchi	04/09/2002	KZ	South Kazakhstan Prov.	KZ37	Aksu Jabagly, alt. 1080-1830 m, South Kazakhstan Prov.			M	host: Aster canescens	1
BeeCAsia0010571	BeeCAsia 39	28/5/2017	ELKU	BeeCAsia	Halictus (Hexataenites) resurgens	Animalia	Arthropoda	Insecta	Hymenoptera	Halictidae	Halictinae	Halictus	resurgens		Nurse, 1903	R. Murao	2012	O. Tadauchi	04/09/2002	KZ	South Kazakhstan Prov.	KZ37	Aksu Jabagly, alt. 1080-1830 m, South Kazakhstan Prov.			M	host: Mentha asiatica	1
BeeCAsia0010572	BeeCAsia 39	28/5/2017	ELKU	BeeCAsia	Halictus (Hexataenites) resurgens	Animalia	Arthropoda	Insecta	Hymenoptera	Halictidae	Halictinae	Halictus	resurgens		Nurse, 1903	R. Murao	2012	O. Tadauchi	04/09/2002	KZ	South Kazakhstan Prov.	KZ37	Aksu Jabagly, alt. 1080-1830 m, South Kazakhstan Prov.			M	host: Mentha asiatica	1
BeeCAsia0010573	BeeCAsia 39	28/5/2017	ELKU	BeeCAsia	Halictus (Hexataenites) resurgens	Animalia	Arthropoda	Insecta	Hymenoptera	Halictidae	Halictinae	Halictus	resurgens		Nurse, 1903	R. Murao	2012	O. Tadauchi	04/09/2002	KZ	South Kazakhstan Prov.	KZ37	Aksu Jabagly, alt. 1080-1830 m, South Kazakhstan Prov.			M	host: Sysimbrium sp.	1
BeeCAsia0010626	BeeCAsia 32	28/5/2017	ELKU	BeeCAsia	Halictus (Monilapis) compressus transvolgensis	Animalia	Arthropoda	Insecta	Hymenoptera	Halictidae	Halictinae	Halictus	compressus	transvolgensis	Pesenko, 1985	R. Murao	2012	O. Tadauchi	04/09/2002	KZ	South Kazakhstan Prov.	KZ37	Aksu Jabagly, alt. 1080-1830 m, South Kazakhstan Prov.			M	host: Mentha asiatica	1
BeeCAsia0010694	BeeCAsia 32	28/5/2017	ELKU	BeeCAsia	Halictus (Platyhalictus) minor	Animalia	Arthropoda	Insecta	Hymenoptera	Halictidae	Halictinae	Halictus	minor		Morawitz, 1876	R. Murao	2012	O. Tadauchi	04/09/2002	KZ	South Kazakhstan Prov.	KZ37	Aksu Jabagly, alt. 1080-1830 m, South Kazakhstan Prov.			M		1
BeeCAsia0010695	BeeCAsia 32	28/5/2017	ELKU	BeeCAsia	Halictus (Platyhalictus) minor	Animalia	Arthropoda	Insecta	Hymenoptera	Halictidae	Halictinae	Halictus	minor		Morawitz, 1876	R. Murao	2012	O. Tadauchi	04/09/2002	KZ	South Kazakhstan Prov.	KZ37	Aksu Jabagly, alt. 1080-1830 m, South Kazakhstan Prov.			M	host: Mentha asiatica	1
BeeCAsia0010574	BeeCAsia 39	28/5/2017	ELKU	BeeCAsia	Halictus (Hexataenites) resurgens	Animalia	Arthropoda	Insecta	Hymenoptera	Halictidae	Halictinae	Halictus	resurgens		Nurse, 1903	R. Murao	2012	R. Miyanaga	04/09/2002	KZ	South Kazakhstan Prov.	KZ37	Aksu Jabagly, alt. 1080-1830 m, South Kazakhstan Prov.			M	host: Origanum tyttanthum	1
BeeCAsia0010610	BeeCAsia 39	28/5/2017	ELKU	BeeCAsia	Halictus (Hexataenites) resurgens	Animalia	Arthropoda	Insecta	Hymenoptera	Halictidae	Halictinae	Halictus	resurgens		Nurse, 1903	R. Murao	2012	R. Murao	04/09/2002	KZ	South Kazakhstan Prov.	KZ37	Aksu Jabagly, alt. 1080-1830 m, South Kazakhstan Prov.			M	host: Mentha asiatica	1
BeeCAsia0010693	BeeCAsia 32	28/5/2017	ELKU	BeeCAsia	Halictus (Platyhalictus) minor	Animalia	Arthropoda	Insecta	Hymenoptera	Halictidae	Halictinae	Halictus	minor		Morawitz, 1876	R. Murao	2012	R. Murao	04/09/2002	KZ	South Kazakhstan Prov.	KZ37	Aksu Jabagly, alt. 1080-1830 m, South Kazakhstan Prov.			M		1
BeeCAsia0010706	BeeCAsia 32	28/5/2017	ELKU	BeeCAsia	Halictus (Platyhalictus) minor	Animalia	Arthropoda	Insecta	Hymenoptera	Halictidae	Halictinae	Halictus	minor		Morawitz, 1876	R. Murao	2012	R. Murao	04/09/2002	KZ	South Kazakhstan Prov.	KZ37	Aksu Jabagly, alt. 1080-1830 m, South Kazakhstan Prov.			M		1
BeeCAsia0024596	BeeCAsia 42	28/5/2017	ELKU	BeeCAsia	Halictus (Seladonia) seladonius	Animalia	Arthropoda	Insecta	Hymenoptera	Halictidae	Halictinae	Halictus	seladonius		(Fabricius, 1794)	R. Murao	2012	R. Murao	04/09/2002	KZ	South Kazakhstan Prov.	KZ37	Aksu Jabagly, alt. 1080-1830 m, South Kazakhstan Prov.			M	host: Mentha asiatica	1
BeeCAsia0010635	BeeCAsia 32	28/5/2017	ELKU	BeeCAsia	Halictus (Monilapis) compressus transvolgensis	Animalia	Arthropoda	Insecta	Hymenoptera	Halictidae	Halictinae	Halictus	compressus	transvolgensis	Pesenko, 1985	R. Murao	2012	O. Tadauchi	05/09/2002	KZ	South Kazakhstan Prov.	KZ66	Ulken-Kaindy, Jabagly, alt. 1090-2000 m, South Kazakhstan Prov.			M	host: Aster canescens	1
BeeCAsia0010636	BeeCAsia 32	28/5/2017	ELKU	BeeCAsia	Halictus (Monilapis) compressus transvolgensis	Animalia	Arthropoda	Insecta	Hymenoptera	Halictidae	Halictinae	Halictus	compressus	transvolgensis	Pesenko, 1985	R. Murao	2012	O. Tadauchi	05/09/2002	KZ	South Kazakhstan Prov.	KZ66	Ulken-Kaindy, Jabagly, alt. 1090-2000 m, South Kazakhstan Prov.			M	host: Aster canescens	1
BeeCAsia0010637	BeeCAsia 32	28/5/2017	ELKU	BeeCAsia	Halictus (Monilapis) compressus transvolgensis	Animalia	Arthropoda	Insecta	Hymenoptera	Halictidae	Halictinae	Halictus	compressus	transvolgensis	Pesenko, 1985	R. Murao	2012	O. Tadauchi	05/09/2002	KZ	South Kazakhstan Prov.	KZ66	Ulken-Kaindy, Jabagly, alt. 1090-2000 m, South Kazakhstan Prov.			M	host: Aster canescens	1
BeeCAsia0010638	BeeCAsia 32	28/5/2017	ELKU	BeeCAsia	Halictus (Monilapis) compressus transvolgensis	Animalia	Arthropoda	Insecta	Hymenoptera	Halictidae	Halictinae	Halictus	compressus	transvolgensis	Pesenko, 1985	R. Murao	2012	O. Tadauchi	05/09/2002	KZ	South Kazakhstan Prov.	KZ66	Ulken-Kaindy, Jabagly, alt. 1090-2000 m, South Kazakhstan Prov.			M	host: Aster canescens	1
BeeCAsia0010639	BeeCAsia 32	28/5/2017	ELKU	BeeCAsia	Halictus (Monilapis) compressus transvolgensis	Animalia	Arthropoda	Insecta	Hymenoptera	Halictidae	Halictinae	Halictus	compressus	transvolgensis	Pesenko, 1985	R. Murao	2012	O. Tadauchi	05/09/2002	KZ	South Kazakhstan Prov.	KZ66	Ulken-Kaindy, Jabagly, alt. 1090-2000 m, South Kazakhstan Prov.			M	host: Chondrilla sp.	1
BeeCAsia0010640	BeeCAsia 32	28/5/2017	ELKU	BeeCAsia	Halictus (Monilapis) compressus transvolgensis	Animalia	Arthropoda	Insecta	Hymenoptera	Halictidae	Halictinae	Halictus	compressus	transvolgensis	Pesenko, 1985	R. Murao	2012	O. Tadauchi	05/09/2002	KZ	South Kazakhstan Prov.	KZ66	Ulken-Kaindy, Jabagly, alt. 1090-2000 m, South Kazakhstan Prov.			M	host: Aster canescens	1
BeeCAsia0010641	BeeCAsia 32	28/5/2017	ELKU	BeeCAsia	Halictus (Monilapis) compressus transvolgensis	Animalia	Arthropoda	Insecta	Hymenoptera	Halictidae	Halictinae	Halictus	compressus	transvolgensis	Pesenko, 1985	R. Murao	2012	O. Tadauchi	05/09/2002	KZ	South Kazakhstan Prov.	KZ66	Ulken-Kaindy, Jabagly, alt. 1090-2000 m, South Kazakhstan Prov.			M	host: Aster canescens	1
BeeCAsia0010642	BeeCAsia 32	28/5/2017	ELKU	BeeCAsia	Halictus (Monilapis) compressus transvolgensis	Animalia	Arthropoda	Insecta	Hymenoptera	Halictidae	Halictinae	Halictus	compressus	transvolgensis	Pesenko, 1985	R. Murao	2012	O. Tadauchi	05/09/2002	KZ	South Kazakhstan Prov.	KZ66	Ulken-Kaindy, Jabagly, alt. 1090-2000 m, South Kazakhstan Prov.			M	host: Aster canescens	1
BeeCAsia0010643	BeeCAsia 32	28/5/2017	ELKU	BeeCAsia	Halictus (Monilapis) compressus transvolgensis	Animalia	Arthropoda	Insecta	Hymenoptera	Halictidae	Halictinae	Halictus	compressus	transvolgensis	Pesenko, 1985	R. Murao	2012	O. Tadauchi	05/09/2002	KZ	South Kazakhstan Prov.	KZ66	Ulken-Kaindy, Jabagly, alt. 1090-2000 m, South Kazakhstan Prov.			M	host: Aster canescens	1
BeeCAsia0010658	BeeCAsia 32	28/5/2017	ELKU	BeeCAsia	Halictus (Tytthalictus) palustris	Animalia	Arthropoda	Insecta	Hymenoptera	Halictidae	Halictinae	Halictus	palustris		Morawitz, 1876	R. Murao	2012	O. Tadauchi	05/09/2002	KZ	South Kazakhstan Prov.	KZ66	Ulken-Kaindy, Jabagly, alt. 1090-2000 m, South Kazakhstan Prov.			M	host: Aster canescens	1
BeeCAsia0009843	BeeCAsia 31	28/5/2017	ELKU	BeeCAsia	Halictus (Halictus) brunnescens	Animalia	Arthropoda	Insecta	Hymenoptera	Halictidae	Halictinae	Halictus	brunnescens		(Eversmann, 1852)	R. Murao	2012	O. Tadauchi	05/09/2002	KZ	South Kazakhstan Prov.	KZ66	Ulken-Kaindy, Jabagly, alt. 1090-2000 m, South Kazakhstan Prov.			M	host: Hibiscus sp.	1
BeeCAsia0009844	BeeCAsia 31	28/5/2017	ELKU	BeeCAsia	Halictus (Halictus) brunnescens	Animalia	Arthropoda	Insecta	Hymenoptera	Halictidae	Halictinae	Halictus	brunnescens		(Eversmann, 1852)	R. Murao	2012	O. Tadauchi	05/09/2002	KZ	South Kazakhstan Prov.	KZ66	Ulken-Kaindy, Jabagly, alt. 1090-2000 m, South Kazakhstan Prov.			M	host: Mentha asiatica	1
BeeCAsia0009845	BeeCAsia 31	28/5/2017	ELKU	BeeCAsia	Halictus (Halictus) brunnescens	Animalia	Arthropoda	Insecta	Hymenoptera	Halictidae	Halictinae	Halictus	brunnescens		(Eversmann, 1852)	R. Murao	2012	R. Miyanaga	05/09/2002	KZ	South Kazakhstan Prov.	KZ66	Ulken-Kaindy, Jabagly, alt. 1090-2000 m, South Kazakhstan Prov.			M	host: Hypochoeris sp. ?	1
BeeCAsia0010615	BeeCAsia 32	28/5/2017	ELKU	BeeCAsia	Halictus (Monilapis) compressus transvolgensis	Animalia	Arthropoda	Insecta	Hymenoptera	Halictidae	Halictinae	Halictus	compressus	transvolgensis	Pesenko, 1985	R. Murao	2012	R. Miyanaga	05/09/2002	KZ	South Kazakhstan Prov.	KZ66	Ulken-Kaindy, Jabagly, alt. 1090-2000 m, South Kazakhstan Prov.			M		1
BeeCAsia0009848	BeeCAsia 31	28/5/2017	ELKU	BeeCAsia	Halictus (Halictus) brunnescens	Animalia	Arthropoda	Insecta	Hymenoptera	Halictidae	Halictinae	Halictus	brunnescens		(Eversmann, 1852)	R. Murao	2012	R. Murao	05/09/2002	KZ	South Kazakhstan Prov.	KZ66	Ulken-Kaindy, Jabagly, alt. 1090-2000 m, South Kazakhstan Prov.			M	host: Asteraceae gen. et. sp.	1
BeeCAsia0009850	BeeCAsia 31	28/5/2017	ELKU	BeeCAsia	Halictus (Halictus) brunnescens	Animalia	Arthropoda	Insecta	Hymenoptera	Halictidae	Halictinae	Halictus	brunnescens		(Eversmann, 1852)	R. Murao	2012	R. Murao	05/09/2002	KZ	South Kazakhstan Prov.	KZ66	Ulken-Kaindy, Jabagly, alt. 1090-2000 m, South Kazakhstan Prov.			M		1
BeeCAsia0009851	BeeCAsia 31	28/5/2017	ELKU	BeeCAsia	Halictus (Halictus) brunnescens	Animalia	Arthropoda	Insecta	Hymenoptera	Halictidae	Halictinae	Halictus	brunnescens		(Eversmann, 1852)	R. Murao	2012	R. Murao	05/09/2002	KZ	South Kazakhstan Prov.	KZ66	Ulken-Kaindy, Jabagly, alt. 1090-2000 m, South Kazakhstan Prov.			M		1
BeeCAsia0010630	BeeCAsia 32	28/5/2017	ELKU	BeeCAsia	Halictus (Monilapis) compressus transvolgensis	Animalia	Arthropoda	Insecta	Hymenoptera	Halictidae	Halictinae	Halictus	compressus	transvolgensis	Pesenko, 1985	R. Murao	2012	R. Murao	05/09/2002	KZ	South Kazakhstan Prov.	KZ66	Ulken-Kaindy, Jabagly, alt. 1090-2000 m, South Kazakhstan Prov.			M		1
BeeCAsia0011069	BeeCAsia 21	28/5/2017	ELKU	BeeCAsia	Halictus (Vestitohalictus) pulvereus	Animalia	Arthropoda	Insecta	Hymenoptera	Halictidae	Halictinae	Halictus	pulvereus		Morawitz, 1874	R. Murao	2012	R. Miyanaga	02/09/2002	KZ	Almaty Prov.	KZ15	East of Almaty, Almaty Prov.			M		1
BeeCAsia0011070	BeeCAsia 21	28/5/2017	ELKU	BeeCAsia	Halictus (Vestitohalictus) pulvereus	Animalia	Arthropoda	Insecta	Hymenoptera	Halictidae	Halictinae	Halictus	pulvereus		Morawitz, 1874	R. Murao	2012	R. Miyanaga	02/09/2002	KZ	Almaty Prov.	KZ15	East of Almaty, Almaty Prov.			M		1
BeeCAsia0011072	BeeCAsia 21	28/5/2017	ELKU	BeeCAsia	Halictus (Vestitohalictus) pulvereus	Animalia	Arthropoda	Insecta	Hymenoptera	Halictidae	Halictinae	Halictus	pulvereus		Morawitz, 1874	R. Murao	2012	R. Miyanaga	02/09/2002	KZ	Almaty Prov.	KZ15	East of Almaty, Almaty Prov.			M		1
BeeCAsia0011108	BeeCAsia 21	28/5/2017	ELKU	BeeCAsia	Halictus (Vestitohalictus) pulvereus	Animalia	Arthropoda	Insecta	Hymenoptera	Halictidae	Halictinae	Halictus	pulvereus		Morawitz, 1874	R. Murao	2012	R. Miyanaga	02/09/2002	KZ	Almaty Prov.	KZ15	East of Almaty, Almaty Prov.			M		1
BeeCAsia0010585	BeeCAsia 39	28/5/2017	ELKU	BeeCAsia	Halictus (Hexataenites) resurgens	Animalia	Arthropoda	Insecta	Hymenoptera	Halictidae	Halictinae	Halictus	resurgens		Nurse, 1903	R. Murao	2012	R. Miyanaga	02/09/2002	KZ	Almaty Prov.	KZ14	Chilik riverside, East of Almaty, Almaty Prov.			M	host: Cirsium sp.	1
BeeCAsia0010586	BeeCAsia 39	28/5/2017	ELKU	BeeCAsia	Halictus (Hexataenites) resurgens	Animalia	Arthropoda	Insecta	Hymenoptera	Halictidae	Halictinae	Halictus	resurgens		Nurse, 1903	R. Murao	2012	R. Miyanaga	02/09/2002	KZ	Almaty Prov.	KZ14	Chilik riverside, East of Almaty, Almaty Prov.			M	host: Cirsium sp.	1
BeeCAsia0010587	BeeCAsia 39	28/5/2017	ELKU	BeeCAsia	Halictus (Hexataenites) resurgens	Animalia	Arthropoda	Insecta	Hymenoptera	Halictidae	Halictinae	Halictus	resurgens		Nurse, 1903	R. Murao	2012	R. Miyanaga	02/09/2002	KZ	Almaty Prov.	KZ14	Chilik riverside, East of Almaty, Almaty Prov.			M	host: Cirsium sp.	1
BeeCAsia0010588	BeeCAsia 39	28/5/2017	ELKU	BeeCAsia	Halictus (Hexataenites) resurgens	Animalia	Arthropoda	Insecta	Hymenoptera	Halictidae	Halictinae	Halictus	resurgens		Nurse, 1903	R. Murao	2012	R. Miyanaga	02/09/2002	KZ	Almaty Prov.	KZ14	Chilik riverside, East of Almaty, Almaty Prov.			M	host: Tamarix ramosissima	1
BeeCAsia0010589	BeeCAsia 39	28/5/2017	ELKU	BeeCAsia	Halictus (Hexataenites) resurgens	Animalia	Arthropoda	Insecta	Hymenoptera	Halictidae	Halictinae	Halictus	resurgens		Nurse, 1903	R. Murao	2012	R. Miyanaga	02/09/2002	KZ	Almaty Prov.	KZ14	Chilik riverside, East of Almaty, Almaty Prov.			M	host: Cirsium sp.	1
BeeCAsia0010576	BeeCAsia 39	28/5/2017	ELKU	BeeCAsia	Halictus (Hexataenites) resurgens	Animalia	Arthropoda	Insecta	Hymenoptera	Halictidae	Halictinae	Halictus	resurgens		Nurse, 1903	R. Murao	2012	R. Murao	03/09/2002	KZ	Almaty Prov.	KZ14	Chilik riverside, East of Almaty, Almaty Prov.			M		1
BeeCAsia0010577	BeeCAsia 39	28/5/2017	ELKU	BeeCAsia	Halictus (Hexataenites) resurgens	Animalia	Arthropoda	Insecta	Hymenoptera	Halictidae	Halictinae	Halictus	resurgens		Nurse, 1903	R. Murao	2012	R. Murao	03/09/2002	KZ	Almaty Prov.	KZ14	Chilik riverside, East of Almaty, Almaty Prov.			M		1
BeeCAsia0010578	BeeCAsia 39	28/5/2017	ELKU	BeeCAsia	Halictus (Hexataenites) resurgens	Animalia	Arthropoda	Insecta	Hymenoptera	Halictidae	Halictinae	Halictus	resurgens		Nurse, 1903	R. Murao	2012	R. Murao	03/09/2002	KZ	Almaty Prov.	KZ14	Chilik riverside, East of Almaty, Almaty Prov.			M		1
BeeCAsia0010579	BeeCAsia 39	28/5/2017	ELKU	BeeCAsia	Halictus (Hexataenites) resurgens	Animalia	Arthropoda	Insecta	Hymenoptera	Halictidae	Halictinae	Halictus	resurgens		Nurse, 1903	R. Murao	2012	R. Murao	03/09/2002	KZ	Almaty Prov.	KZ14	Chilik riverside, East of Almaty, Almaty Prov.			M		1
BeeCAsia0010580	BeeCAsia 39	28/5/2017	ELKU	BeeCAsia	Halictus (Hexataenites) resurgens	Animalia	Arthropoda	Insecta	Hymenoptera	Halictidae	Halictinae	Halictus	resurgens		Nurse, 1903	R. Murao	2012	R. Murao	03/09/2002	KZ	Almaty Prov.	KZ14	Chilik riverside, East of Almaty, Almaty Prov.			M		1
BeeCAsia0010581	BeeCAsia 39	28/5/2017	ELKU	BeeCAsia	Halictus (Hexataenites) resurgens	Animalia	Arthropoda	Insecta	Hymenoptera	Halictidae	Halictinae	Halictus	resurgens		Nurse, 1903	R. Murao	2012	R. Murao	03/09/2002	KZ	Almaty Prov.	KZ14	Chilik riverside, East of Almaty, Almaty Prov.			M		1
BeeCAsia0010582	BeeCAsia 39	28/5/2017	ELKU	BeeCAsia	Halictus (Hexataenites) resurgens	Animalia	Arthropoda	Insecta	Hymenoptera	Halictidae	Halictinae	Halictus	resurgens		Nurse, 1903	R. Murao	2012	R. Murao	03/09/2002	KZ	Almaty Prov.	KZ14	Chilik riverside, East of Almaty, Almaty Prov.			M		1
BeeCAsia0010583	BeeCAsia 39	28/5/2017	ELKU	BeeCAsia	Halictus (Hexataenites) resurgens	Animalia	Arthropoda	Insecta	Hymenoptera	Halictidae	Halictinae	Halictus	resurgens		Nurse, 1903	R. Murao	2012	R. Murao	03/09/2002	KZ	Almaty Prov.	KZ14	Chilik riverside, East of Almaty, Almaty Prov.			M		1
BeeCAsia0010584	BeeCAsia 39	28/5/2017	ELKU	BeeCAsia	Halictus (Hexataenites) resurgens	Animalia	Arthropoda	Insecta	Hymenoptera	Halictidae	Halictinae	Halictus	resurgens		Nurse, 1903	R. Murao	2012	R. Murao	03/09/2002	KZ	Almaty Prov.	KZ14	Chilik riverside, East of Almaty, Almaty Prov.			M		1
BeeCAsia0010598	BeeCAsia 39	28/5/2017	ELKU	BeeCAsia	Halictus (Hexataenites) resurgens	Animalia	Arthropoda	Insecta	Hymenoptera	Halictidae	Halictinae	Halictus	resurgens		Nurse, 1903	R. Murao	2012	R. Murao	03/09/2002	KZ	Almaty Prov.	KZ14	Chilik riverside, East of Almaty, Almaty Prov.			M		1
BeeCAsia0010599	BeeCAsia 39	28/5/2017	ELKU	BeeCAsia	Halictus (Hexataenites) resurgens	Animalia	Arthropoda	Insecta	Hymenoptera	Halictidae	Halictinae	Halictus	resurgens		Nurse, 1903	R. Murao	2012	R. Murao	03/09/2002	KZ	Almaty Prov.	KZ14	Chilik riverside, East of Almaty, Almaty Prov.			M		1
BeeCAsia0009919	BeeCAsia 32	28/5/2017	ELKU	BeeCAsia	Halictus (Argalictus) tibialis	Animalia	Arthropoda	Insecta	Hymenoptera	Halictidae	Halictinae	Halictus	tibialis		Walker, 1871	R. Murao	2012	O. Tadauchi	27/08/2004	KZ	Jambyl Prov.	KZ26	Kordai, alt. 540-1080 m, Jambyl Prov.			M		1
BeeCAsia0010701	BeeCAsia 32	28/5/2017	ELKU	BeeCAsia	Halictus (Platyhalictus) minor	Animalia	Arthropoda	Insecta	Hymenoptera	Halictidae	Halictinae	Halictus	minor		Morawitz, 1876	R. Murao	2012	O. Tadauchi	27/08/2004	KZ	Jambyl Prov.	KZ26	Kordai, alt. 540-1080 m, Jambyl Prov.			M		1
BeeCAsia0011039	BeeCAsia 21	28/5/2017	ELKU	BeeCAsia	Halictus (Vestitohalictus) pulvereus	Animalia	Arthropoda	Insecta	Hymenoptera	Halictidae	Halictinae	Halictus	pulvereus		Morawitz, 1874	R. Murao	2012	R. Murao	03/09/2002	KZ		KZ69	Nurly village			M		1
BeeCAsia0011644	BeeCAsia 19	28/5/2017	ELKU	BeeCAsia	Halictus (Mucoreohalictus) mucoreus	Animalia	Arthropoda	Insecta	Hymenoptera	Halictidae	Halictinae	Halictus	mucoreus		Eversmann, 1852	R. Murao	2012	O. Tadauchi	28/05/2000	KG	Bishkek	KG1	Bishkek City			F	host: Brassica sp.	1
BeeCAsia0011645	BeeCAsia 19	28/5/2017	ELKU	BeeCAsia	Halictus (Mucoreohalictus) mucoreus	Animalia	Arthropoda	Insecta	Hymenoptera	Halictidae	Halictinae	Halictus	mucoreus		Eversmann, 1852	R. Murao	2012	O. Tadauchi	28/05/2000	KG	Bishkek	KG1	Bishkek City			F	host: Brassica sp.	1
BeeCAsia0011646	BeeCAsia 19	28/5/2017	ELKU	BeeCAsia	Halictus (Mucoreohalictus) mucoreus	Animalia	Arthropoda	Insecta	Hymenoptera	Halictidae	Halictinae	Halictus	mucoreus		Eversmann, 1852	R. Murao	2012	O. Tadauchi	28/05/2000	KG	Bishkek	KG1	Bishkek City			F	host: Brassica sp.	1
BeeCAsia0011647	BeeCAsia 19	28/5/2017	ELKU	BeeCAsia	Halictus (Mucoreohalictus) mucoreus	Animalia	Arthropoda	Insecta	Hymenoptera	Halictidae	Halictinae	Halictus	mucoreus		Eversmann, 1852	R. Murao	2012	O. Tadauchi	28/05/2000	KG	Bishkek	KG1	Bishkek City			F	host: Brassica sp.	1
BeeCAsia0010833	BeeCAsia 20	28/5/2017	ELKU	BeeCAsia	Halictus (Seladonia) pjalmensis pjalmensis	Animalia	Arthropoda	Insecta	Hymenoptera	Halictidae	Halictinae	Halictus	pjalmensis	pjalmensis	Strand, 1909	R. Murao	2012	O. Tadauchi	28/05/2000	KG	Bishkek	KG1	Bishkek City			F	host: Brassica sp.	1
BeeCAsia0011236	BeeCAsia 19	28/5/2017	ELKU	BeeCAsia	Halictus (Mucoreohalictus) mucoreus	Animalia	Arthropoda	Insecta	Hymenoptera	Halictidae	Halictinae	Halictus	mucoreus		Eversmann, 1852	R. Murao	2012	A. Dawut	28/05/2000	KG	Bishkek	KG1	Bishkek City			F	host: Brassica sp.	1
BeeCAsia0011237	BeeCAsia 19	28/5/2017	ELKU	BeeCAsia	Halictus (Mucoreohalictus) mucoreus	Animalia	Arthropoda	Insecta	Hymenoptera	Halictidae	Halictinae	Halictus	mucoreus		Eversmann, 1852	R. Murao	2012	A. Dawut	28/05/2000	KG	Bishkek	KG1	Bishkek City			F	host: Brassica sp.	1
BeeCAsia0011238	BeeCAsia 19	28/5/2017	ELKU	BeeCAsia	Halictus (Mucoreohalictus) mucoreus	Animalia	Arthropoda	Insecta	Hymenoptera	Halictidae	Halictinae	Halictus	mucoreus		Eversmann, 1852	R. Murao	2012	A. Dawut	28/05/2000	KG	Bishkek	KG1	Bishkek City			F	host: Brassica sp.	1
BeeCAsia0011085	BeeCAsia 21	28/5/2017	ELKU	BeeCAsia	Halictus (Vestitohalictus) pulvereus	Animalia	Arthropoda	Insecta	Hymenoptera	Halictidae	Halictinae	Halictus	pulvereus		Morawitz, 1874	R. Murao	2012	A. Dawut	26/08/2002	CN	Ili Prov.	CN4	Gaoquan, Kuitun city, Xinjiang Urgur Aut. Reg.			M		1
BeeCAsia0010978	BeeCAsia 21	28/5/2017	ELKU	BeeCAsia	Halictus (Vestitohalictus) pulvereus	Animalia	Arthropoda	Insecta	Hymenoptera	Halictidae	Halictinae	Halictus	pulvereus		Morawitz, 1874	R. Murao	2012	A. Dawut	22/08/2002	CN	Changji Prov.	CN3	Fukang, alt. 520m, Changji Prov., Xinjiang Uygur Aut. Reg.			M	host: Tamarix sp.	1
BeeCAsia0009923	BeeCAsia 32	28/5/2017	ELKU	BeeCAsia	Halictus (Argalictus) senilis	Animalia	Arthropoda	Insecta	Hymenoptera	Halictidae	Halictinae	Halictus	senilis		(Eversmann, 1852)	R. Murao	2012	R. Miyanaga	23/08/2002	CN	Turpan Prov.	CN13	Sugongta, Turpan Prov., Xinjiang Uygur Aut. Reg.			M		1
BeeCAsia0009927	BeeCAsia 32	28/5/2017	ELKU	BeeCAsia	Halictus (Tytthalictus) palustris	Animalia	Arthropoda	Insecta	Hymenoptera	Halictidae	Halictinae	Halictus	palustris		Morawitz, 1876	R. Murao	2012	A. Dawut	27/08/2002	CN	Altay Prov.	CN2	Jeminay County, alt. 800-1050 m, Altay Prov., Xinjiang Uygur Aut. Reg.			M		1
BeeCAsia0009937	BeeCAsia 19	28/5/2017	ELKU	BeeCAsia	Halictus (Mucoreohalictus) pollinosus cariniventris	Animalia	Arthropoda	Insecta	Hymenoptera	Halictidae	Halictinae	Halictus	pollinosus	cariniventris	Morawitz, 1876	R. Murao	2012	O. Tadauchi	24/08/2002	CN	Ili Prov.	CN7	Kuitun City, alt. 530 m, Ili Prov., Xinjiang Uygur Aut. Reg.			M		1
BeeCAsia0010600	BeeCAsia 39	28/5/2017	ELKU	BeeCAsia	Halictus (Hexataenites) resurgens	Animalia	Arthropoda	Insecta	Hymenoptera	Halictidae	Halictinae	Halictus	resurgens		Nurse, 1903	R. Murao	2012	R. Murao	24/08/2002	CN	Ili Prov.	CN7	Kuitun City, alt. 530 m, Ili Prov., Xinjiang Uygur Aut. Reg.			M		1
BeeCAsia0010043	BeeCAsia 39	28/5/2017	ELKU	BeeCAsia	Halictus (Platyhalictus) minor	Animalia	Arthropoda	Insecta	Hymenoptera	Halictidae	Halictinae	Halictus	minor		Morawitz, 1876	R. Murao	2012	O. Tadauchi	04/09/2002	KZ	South Kazakhstan Prov.	KZ37	Aksu Jabagly, alt. 1080-1830 m, South Kazakhstan Prov.			F		1
BeeCAsia0010130	BeeCAsia 32	28/5/2017	ELKU	BeeCAsia	Halictus (Monilapis) compressus transvolgensis	Animalia	Arthropoda	Insecta	Hymenoptera	Halictidae	Halictinae	Halictus	compressus	transvolgensis	Pesenko, 1985	R. Murao	2012	O. Tadauchi	04/09/2002	KZ	South Kazakhstan Prov.	KZ37	Aksu Jabagly, alt. 1080-1830 m, South Kazakhstan Prov.			F		1
BeeCAsia0010131	BeeCAsia 32	28/5/2017	ELKU	BeeCAsia	Halictus (Monilapis) compressus transvolgensis	Animalia	Arthropoda	Insecta	Hymenoptera	Halictidae	Halictinae	Halictus	compressus	transvolgensis	Pesenko, 1985	R. Murao	2012	O. Tadauchi	04/09/2002	KZ	South Kazakhstan Prov.	KZ37	Aksu Jabagly, alt. 1080-1830 m, South Kazakhstan Prov.			F		1
BeeCAsia0010132	BeeCAsia 32	28/5/2017	ELKU	BeeCAsia	Halictus (Monilapis) compressus transvolgensis	Animalia	Arthropoda	Insecta	Hymenoptera	Halictidae	Halictinae	Halictus	compressus	transvolgensis	Pesenko, 1985	R. Murao	2012	O. Tadauchi	04/09/2002	KZ	South Kazakhstan Prov.	KZ37	Aksu Jabagly, alt. 1080-1830 m, South Kazakhstan Prov.			F	host: Aster canescens	1
BeeCAsia0010133	BeeCAsia 32	28/5/2017	ELKU	BeeCAsia	Halictus (Monilapis) compressus transvolgensis	Animalia	Arthropoda	Insecta	Hymenoptera	Halictidae	Halictinae	Halictus	compressus	transvolgensis	Pesenko, 1985	R. Murao	2012	O. Tadauchi	04/09/2002	KZ	South Kazakhstan Prov.	KZ37	Aksu Jabagly, alt. 1080-1830 m, South Kazakhstan Prov.			F	host: Aster canescens	1
BeeCAsia0010191	BeeCAsia 31	28/5/2017	ELKU	BeeCAsia	Halictus (Halictus) brunnescens	Animalia	Arthropoda	Insecta	Hymenoptera	Halictidae	Halictinae	Halictus	brunnescens		(Eversmann, 1852)	R. Murao	2012	O. Tadauchi	04/09/2002	KZ	South Kazakhstan Prov.	KZ37	Aksu Jabagly, alt. 1080-1830 m, South Kazakhstan Prov.			F		1
BeeCAsia0011495	BeeCAsia 21	28/5/2017	ELKU	BeeCAsia	Halictus (Seladonia) seladonius	Animalia	Arthropoda	Insecta	Hymenoptera	Halictidae	Halictinae	Halictus	seladonius		(Fabricius, 1794)	R. Murao	2012	O. Tadauchi	04/09/2002	KZ	South Kazakhstan Prov.	KZ37	Aksu Jabagly, alt. 1080-1830 m, South Kazakhstan Prov.			F		1
BeeCAsia0010044	BeeCAsia 39	28/5/2017	ELKU	BeeCAsia	Halictus (Platyhalictus) minor	Animalia	Arthropoda	Insecta	Hymenoptera	Halictidae	Halictinae	Halictus	minor		Morawitz, 1876	R. Murao	2012	R. Murao	04/09/2002	KZ	South Kazakhstan Prov.	KZ37	Aksu Jabagly, alt. 1080-1830 m, South Kazakhstan Prov.			F		1
BeeCAsia0011180	BeeCAsia 19	28/5/2017	ELKU	BeeCAsia	Halictus (Mucoreohalictus) mucidus	Animalia	Arthropoda	Insecta	Hymenoptera	Halictidae	Halictinae	Halictus	mucidus		Blüthgen, 1923	R. Murao	2012	O. Tadauchi	04/09/2002	KZ	South Kazakhstan Prov.	KZ37	Aksu Jabagly, alt. 1080-1830 m, South Kazakhstan Prov.			F	host: Asteraceae gen. et. sp.	1
BeeCAsia0009955	BeeCAsia 39	28/5/2017	ELKU	BeeCAsia	Halictus (Hexataenites) resurgens	Animalia	Arthropoda	Insecta	Hymenoptera	Halictidae	Halictinae	Halictus	resurgens		Nurse, 1903	R. Murao	2012	O. Tadauchi	11/05/2004	KZ	South Kazakhstan Prov.	KZ37	Aksu Jabagly, alt. 1080-1830 m, South Kazakhstan Prov.			F		1
BeeCAsia0009957	BeeCAsia 39	28/5/2017	ELKU	BeeCAsia	Halictus (Hexataenites) resurgens	Animalia	Arthropoda	Insecta	Hymenoptera	Halictidae	Halictinae	Halictus	resurgens		Nurse, 1903	R. Murao	2012	O. Tadauchi	11/05/2004	KZ	South Kazakhstan Prov.	KZ37	Aksu Jabagly, alt. 1080-1830 m, South Kazakhstan Prov.			F		1
BeeCAsia0009973	BeeCAsia 39	28/5/2017	ELKU	BeeCAsia	Halictus (Hexataenites) resurgens	Animalia	Arthropoda	Insecta	Hymenoptera	Halictidae	Halictinae	Halictus	resurgens		Nurse, 1903	R. Murao	2012	O. Tadauchi	11/05/2004	KZ	South Kazakhstan Prov.	KZ37	Aksu Jabagly, alt. 1080-1830 m, South Kazakhstan Prov.			F		1
BeeCAsia0009974	BeeCAsia 39	28/5/2017	ELKU	BeeCAsia	Halictus (Hexataenites) resurgens	Animalia	Arthropoda	Insecta	Hymenoptera	Halictidae	Halictinae	Halictus	resurgens		Nurse, 1903	R. Murao	2012	O. Tadauchi	11/05/2004	KZ	South Kazakhstan Prov.	KZ37	Aksu Jabagly, alt. 1080-1830 m, South Kazakhstan Prov.			F		1
BeeCAsia0010017	BeeCAsia 32	28/5/2017	ELKU	BeeCAsia	Halictus (Tytthalictus) palustris	Animalia	Arthropoda	Insecta	Hymenoptera	Halictidae	Halictinae	Halictus	palustris		Morawitz, 1876	R. Murao	2012	O. Tadauchi	11/05/2004	KZ	South Kazakhstan Prov.	KZ37	Aksu Jabagly, alt. 1080-1830 m, South Kazakhstan Prov.			F		1
BeeCAsia0010018	BeeCAsia 32	28/5/2017	ELKU	BeeCAsia	Halictus (Tytthalictus) palustris	Animalia	Arthropoda	Insecta	Hymenoptera	Halictidae	Halictinae	Halictus	palustris		Morawitz, 1876	R. Murao	2012	O. Tadauchi	11/05/2004	KZ	South Kazakhstan Prov.	KZ37	Aksu Jabagly, alt. 1080-1830 m, South Kazakhstan Prov.			F		1
BeeCAsia0010045	BeeCAsia 39	28/5/2017	ELKU	BeeCAsia	Halictus (Platyhalictus) minor	Animalia	Arthropoda	Insecta	Hymenoptera	Halictidae	Halictinae	Halictus	minor		Morawitz, 1876	R. Murao	2012	O. Tadauchi	11/05/2004	KZ	South Kazakhstan Prov.	KZ37	Aksu Jabagly, alt. 1080-1830 m, South Kazakhstan Prov.			F		1
BeeCAsia0010148	BeeCAsia 32	28/5/2017	ELKU	BeeCAsia	Halictus (Monilapis) compressus transvolgensis	Animalia	Arthropoda	Insecta	Hymenoptera	Halictidae	Halictinae	Halictus	compressus	transvolgensis	Pesenko, 1985	R. Murao	2012	O. Tadauchi	11/05/2004	KZ	South Kazakhstan Prov.	KZ37	Aksu Jabagly, alt. 1080-1830 m, South Kazakhstan Prov.			F		1
BeeCAsia0010149	BeeCAsia 32	28/5/2017	ELKU	BeeCAsia	Halictus (Monilapis) compressus transvolgensis	Animalia	Arthropoda	Insecta	Hymenoptera	Halictidae	Halictinae	Halictus	compressus	transvolgensis	Pesenko, 1985	R. Murao	2012	O. Tadauchi	11/05/2004	KZ	South Kazakhstan Prov.	KZ37	Aksu Jabagly, alt. 1080-1830 m, South Kazakhstan Prov.			F		1
BeeCAsia0010150	BeeCAsia 32	28/5/2017	ELKU	BeeCAsia	Halictus (Monilapis) compressus transvolgensis	Animalia	Arthropoda	Insecta	Hymenoptera	Halictidae	Halictinae	Halictus	compressus	transvolgensis	Pesenko, 1985	R. Murao	2012	O. Tadauchi	11/05/2004	KZ	South Kazakhstan Prov.	KZ37	Aksu Jabagly, alt. 1080-1830 m, South Kazakhstan Prov.			F		1
BeeCAsia0010151	BeeCAsia 32	28/5/2017	ELKU	BeeCAsia	Halictus (Monilapis) compressus transvolgensis	Animalia	Arthropoda	Insecta	Hymenoptera	Halictidae	Halictinae	Halictus	compressus	transvolgensis	Pesenko, 1985	R. Murao	2012	O. Tadauchi	11/05/2004	KZ	South Kazakhstan Prov.	KZ37	Aksu Jabagly, alt. 1080-1830 m, South Kazakhstan Prov.			F		1
BeeCAsia0010152	BeeCAsia 32	28/5/2017	ELKU	BeeCAsia	Halictus (Monilapis) compressus transvolgensis	Animalia	Arthropoda	Insecta	Hymenoptera	Halictidae	Halictinae	Halictus	compressus	transvolgensis	Pesenko, 1985	R. Murao	2012	O. Tadauchi	11/05/2004	KZ	South Kazakhstan Prov.	KZ37	Aksu Jabagly, alt. 1080-1830 m, South Kazakhstan Prov.			F		1
BeeCAsia0009659	BeeCAsia 31	28/5/2017	ELKU	BeeCAsia	Halictus (Halictus) brunnescens	Animalia	Arthropoda	Insecta	Hymenoptera	Halictidae	Halictinae	Halictus	brunnescens		(Eversmann, 1852)	R. Murao	2012	O. Tadauchi	11/05/2004	KZ	South Kazakhstan Prov.	KZ37	Aksu Jabagly, alt. 1080-1830 m, South Kazakhstan Prov.			F		1
BeeCAsia0010259	BeeCAsia 39	28/5/2017	ELKU	BeeCAsia	Halictus (Hexataenites) resurgens	Animalia	Arthropoda	Insecta	Hymenoptera	Halictidae	Halictinae	Halictus	resurgens		Nurse, 1903	R. Murao	2012	O. Tadauchi	28/05/2003	KZ	South Kazakhstan Prov.	KZ37	Aksu Jabagly, alt. 1080-1830 m, South Kazakhstan Prov.			F		1
BeeCAsia0010262	BeeCAsia 39	28/5/2017	ELKU	BeeCAsia	Halictus (Hexataenites) resurgens	Animalia	Arthropoda	Insecta	Hymenoptera	Halictidae	Halictinae	Halictus	resurgens		Nurse, 1903	R. Murao	2012	O. Tadauchi	28/05/2003	KZ	South Kazakhstan Prov.	KZ37	Aksu Jabagly, alt. 1080-1830 m, South Kazakhstan Prov.			F		1
BeeCAsia0010264	BeeCAsia 39	28/5/2017	ELKU	BeeCAsia	Halictus (Hexataenites) resurgens	Animalia	Arthropoda	Insecta	Hymenoptera	Halictidae	Halictinae	Halictus	resurgens		Nurse, 1903	R. Murao	2012	O. Tadauchi	28/05/2003	KZ	South Kazakhstan Prov.	KZ37	Aksu Jabagly, alt. 1080-1830 m, South Kazakhstan Prov.			F		1
BeeCAsia0010299	BeeCAsia 32	28/5/2017	ELKU	BeeCAsia	Halictus (Monilapis) compressus transvolgensis	Animalia	Arthropoda	Insecta	Hymenoptera	Halictidae	Halictinae	Halictus	compressus	transvolgensis	Pesenko, 1985	R. Murao	2012	O. Tadauchi	28/05/2003	KZ	South Kazakhstan Prov.	KZ37	Aksu Jabagly, alt. 1080-1830 m, South Kazakhstan Prov.			F	host: Fabaceae gen. et. sp.	1
BeeCAsia0010309	BeeCAsia 32	28/5/2017	ELKU	BeeCAsia	Halictus (Monilapis) compressus transvolgensis	Animalia	Arthropoda	Insecta	Hymenoptera	Halictidae	Halictinae	Halictus	compressus	transvolgensis	Pesenko, 1985	R. Murao	2012	O. Tadauchi	28/05/2003	KZ	South Kazakhstan Prov.	KZ37	Aksu Jabagly, alt. 1080-1830 m, South Kazakhstan Prov.			F		1
BeeCAsia0011478	BeeCAsia 20	28/5/2017	ELKU	BeeCAsia	Halictus (Seladonia) pjalmensis pjalmensis	Animalia	Arthropoda	Insecta	Hymenoptera	Halictidae	Halictinae	Halictus	pjalmensis	pjalmensis	Strand, 1909	R. Murao	2012	O. Tadauchi	28/05/2003	KZ	South Kazakhstan Prov.	KZ37	Aksu Jabagly, alt. 1080-1830 m, South Kazakhstan Prov.			F		1
BeeCAsia0011505	BeeCAsia 21	28/5/2017	ELKU	BeeCAsia	Halictus (Seladonia) seladonius	Animalia	Arthropoda	Insecta	Hymenoptera	Halictidae	Halictinae	Halictus	seladonius		(Fabricius, 1794)	R. Murao	2012	O. Tadauchi	28/05/2003	KZ	South Kazakhstan Prov.	KZ37	Aksu Jabagly, alt. 1080-1830 m, South Kazakhstan Prov.			F		1
BeeCAsia0011506	BeeCAsia 21	28/5/2017	ELKU	BeeCAsia	Halictus (Seladonia) seladonius	Animalia	Arthropoda	Insecta	Hymenoptera	Halictidae	Halictinae	Halictus	seladonius		(Fabricius, 1794)	R. Murao	2012	O. Tadauchi	28/05/2003	KZ	South Kazakhstan Prov.	KZ37	Aksu Jabagly, alt. 1080-1830 m, South Kazakhstan Prov.			F		1
BeeCAsia0011507	BeeCAsia 21	28/5/2017	ELKU	BeeCAsia	Halictus (Seladonia) seladonius	Animalia	Arthropoda	Insecta	Hymenoptera	Halictidae	Halictinae	Halictus	seladonius		(Fabricius, 1794)	R. Murao	2012	O. Tadauchi	28/05/2003	KZ	South Kazakhstan Prov.	KZ37	Aksu Jabagly, alt. 1080-1830 m, South Kazakhstan Prov.			F		1
BeeCAsia0011508	BeeCAsia 21	28/5/2017	ELKU	BeeCAsia	Halictus (Seladonia) seladonius	Animalia	Arthropoda	Insecta	Hymenoptera	Halictidae	Halictinae	Halictus	seladonius		(Fabricius, 1794)	R. Murao	2012	O. Tadauchi	28/05/2003	KZ	South Kazakhstan Prov.	KZ37	Aksu Jabagly, alt. 1080-1830 m, South Kazakhstan Prov.			F		1
BeeCAsia0010851	BeeCAsia 20	28/5/2017	ELKU	BeeCAsia	Halictus (Seladonia) pjalmensis pjalmensis	Animalia	Arthropoda	Insecta	Hymenoptera	Halictidae	Halictinae	Halictus	pjalmensis	pjalmensis	Strand, 1909	R. Murao	2012	O. Tadauchi	28/05/2003	KZ	South Kazakhstan Prov.	KZ37	Aksu Jabagly, alt. 1080-1830 m, South Kazakhstan Prov.			F		1
BeeCAsia0010879	BeeCAsia 20	28/5/2017	ELKU	BeeCAsia	Halictus (Seladonia) pjalmensis pjalmensis	Animalia	Arthropoda	Insecta	Hymenoptera	Halictidae	Halictinae	Halictus	pjalmensis	pjalmensis	Strand, 1909	R. Murao	2012	O. Tadauchi	28/05/2003	KZ	South Kazakhstan Prov.	KZ37	Aksu Jabagly, alt. 1080-1830 m, South Kazakhstan Prov.			F		1
BeeCAsia0010888	BeeCAsia 20	28/5/2017	ELKU	BeeCAsia	Halictus (Seladonia) seladonius	Animalia	Arthropoda	Insecta	Hymenoptera	Halictidae	Halictinae	Halictus	seladonius		(Fabricius, 1794)	R. Murao	2012	O. Tadauchi	28/05/2003	KZ	South Kazakhstan Prov.	KZ37	Aksu Jabagly, alt. 1080-1830 m, South Kazakhstan Prov.			F		1
BeeCAsia0010889	BeeCAsia 20	28/5/2017	ELKU	BeeCAsia	Halictus (Seladonia) seladonius	Animalia	Arthropoda	Insecta	Hymenoptera	Halictidae	Halictinae	Halictus	seladonius		(Fabricius, 1794)	R. Murao	2012	O. Tadauchi	28/05/2003	KZ	South Kazakhstan Prov.	KZ37	Aksu Jabagly, alt. 1080-1830 m, South Kazakhstan Prov.			F		1
BeeCAsia0010890	BeeCAsia 20	28/5/2017	ELKU	BeeCAsia	Halictus (Seladonia) seladonius	Animalia	Arthropoda	Insecta	Hymenoptera	Halictidae	Halictinae	Halictus	seladonius		(Fabricius, 1794)	R. Murao	2012	O. Tadauchi	28/05/2003	KZ	South Kazakhstan Prov.	KZ37	Aksu Jabagly, alt. 1080-1830 m, South Kazakhstan Prov.			F		1
BeeCAsia0010891	BeeCAsia 20	28/5/2017	ELKU	BeeCAsia	Halictus (Seladonia) seladonius	Animalia	Arthropoda	Insecta	Hymenoptera	Halictidae	Halictinae	Halictus	seladonius		(Fabricius, 1794)	R. Murao	2012	O. Tadauchi	28/05/2003	KZ	South Kazakhstan Prov.	KZ37	Aksu Jabagly, alt. 1080-1830 m, South Kazakhstan Prov.			F		1
BeeCAsia0010892	BeeCAsia 20	28/5/2017	ELKU	BeeCAsia	Halictus (Seladonia) seladonius	Animalia	Arthropoda	Insecta	Hymenoptera	Halictidae	Halictinae	Halictus	seladonius		(Fabricius, 1794)	R. Murao	2012	O. Tadauchi	28/05/2003	KZ	South Kazakhstan Prov.	KZ37	Aksu Jabagly, alt. 1080-1830 m, South Kazakhstan Prov.			F		1
BeeCAsia0009959	BeeCAsia 39	28/5/2017	ELKU	BeeCAsia	Halictus (Hexataenites) resurgens	Animalia	Arthropoda	Insecta	Hymenoptera	Halictidae	Halictinae	Halictus	resurgens		Nurse, 1903	R. Murao	2012	R. Miyanaga	07/09/2002	KZ	South Kazakhstan Prov.	KZ37	Aksu Jabagly, alt. 1080-1830 m, South Kazakhstan Prov.			F	host: Mentha asiatica	1
BeeCAsia0009960	BeeCAsia 39	28/5/2017	ELKU	BeeCAsia	Halictus (Hexataenites) resurgens	Animalia	Arthropoda	Insecta	Hymenoptera	Halictidae	Halictinae	Halictus	resurgens		Nurse, 1903	R. Murao	2012	R. Miyanaga	07/09/2002	KZ	South Kazakhstan Prov.	KZ37	Aksu Jabagly, alt. 1080-1830 m, South Kazakhstan Prov.			F	host: Mentha asiatica	1
BeeCAsia0010442	BeeCAsia 39	28/5/2017	ELKU	BeeCAsia	Halictus (Hexataenites) resurgens	Animalia	Arthropoda	Insecta	Hymenoptera	Halictidae	Halictinae	Halictus	resurgens		Nurse, 1903	R. Murao	2012	R. Murao	07/09/2002	KZ	South Kazakhstan Prov.	KZ37	Aksu Jabagly, alt. 1080-1830 m, South Kazakhstan Prov.			F	host: Chondrilla sp.	1
BeeCAsia0009549	BeeCAsia 31	28/5/2017	ELKU	BeeCAsia	Halictus (Halictus) brunnescens	Animalia	Arthropoda	Insecta	Hymenoptera	Halictidae	Halictinae	Halictus	brunnescens		(Eversmann, 1852)	R. Murao	2012	V. Lina	03/05/2004	KZ	South Kazakhstan Prov.	KZ37	Aksu Jabagly, alt. 1080-1830 m, South Kazakhstan Prov.			F		1
BeeCAsia0009969	BeeCAsia 39	28/5/2017	ELKU	BeeCAsia	Halictus (Hexataenites) resurgens	Animalia	Arthropoda	Insecta	Hymenoptera	Halictidae	Halictinae	Halictus	resurgens		Nurse, 1903	R. Murao	2012	R. Miyanaga	04/09/2002	KZ	South Kazakhstan Prov.	KZ37	Aksu Jabagly, alt. 1080-1830 m, South Kazakhstan Prov.			F	host: Mentha asiatica	1
BeeCAsia0009971	BeeCAsia 39	28/5/2017	ELKU	BeeCAsia	Halictus (Hexataenites) resurgens	Animalia	Arthropoda	Insecta	Hymenoptera	Halictidae	Halictinae	Halictus	resurgens		Nurse, 1903	R. Murao	2012	R. Miyanaga	04/09/2002	KZ	South Kazakhstan Prov.	KZ37	Aksu Jabagly, alt. 1080-1830 m, South Kazakhstan Prov.			F	host: Mentha asiatica	1
BeeCAsia0009972	BeeCAsia 39	28/5/2017	ELKU	BeeCAsia	Halictus (Hexataenites) resurgens	Animalia	Arthropoda	Insecta	Hymenoptera	Halictidae	Halictinae	Halictus	resurgens		Nurse, 1903	R. Murao	2012	R. Miyanaga	04/09/2002	KZ	South Kazakhstan Prov.	KZ37	Aksu Jabagly, alt. 1080-1830 m, South Kazakhstan Prov.			F	host: Dahlia sp.	1
BeeCAsia0010034	BeeCAsia 39	28/5/2017	ELKU	BeeCAsia	Halictus (Platyhalictus) minor	Animalia	Arthropoda	Insecta	Hymenoptera	Halictidae	Halictinae	Halictus	minor		Morawitz, 1876	R. Murao	2012	R. Miyanaga	04/09/2002	KZ	South Kazakhstan Prov.	KZ37	Aksu Jabagly, alt. 1080-1830 m, South Kazakhstan Prov.			F	host: Mentha asiatica	1
BeeCAsia0010035	BeeCAsia 39	28/5/2017	ELKU	BeeCAsia	Halictus (Platyhalictus) minor	Animalia	Arthropoda	Insecta	Hymenoptera	Halictidae	Halictinae	Halictus	minor		Morawitz, 1876	R. Murao	2012	R. Miyanaga	04/09/2002	KZ	South Kazakhstan Prov.	KZ37	Aksu Jabagly, alt. 1080-1830 m, South Kazakhstan Prov.			F	host: Mentha asiatica	1
BeeCAsia0010036	BeeCAsia 39	28/5/2017	ELKU	BeeCAsia	Halictus (Platyhalictus) minor	Animalia	Arthropoda	Insecta	Hymenoptera	Halictidae	Halictinae	Halictus	minor		Morawitz, 1876	R. Murao	2012	R. Miyanaga	04/09/2002	KZ	South Kazakhstan Prov.	KZ37	Aksu Jabagly, alt. 1080-1830 m, South Kazakhstan Prov.			F	host: Mentha asiatica	1
BeeCAsia0010037	BeeCAsia 39	28/5/2017	ELKU	BeeCAsia	Halictus (Platyhalictus) minor	Animalia	Arthropoda	Insecta	Hymenoptera	Halictidae	Halictinae	Halictus	minor		Morawitz, 1876	R. Murao	2012	R. Miyanaga	04/09/2002	KZ	South Kazakhstan Prov.	KZ37	Aksu Jabagly, alt. 1080-1830 m, South Kazakhstan Prov.			F	host: Mentha asiatica	1
BeeCAsia0010038	BeeCAsia 39	28/5/2017	ELKU	BeeCAsia	Halictus (Platyhalictus) minor	Animalia	Arthropoda	Insecta	Hymenoptera	Halictidae	Halictinae	Halictus	minor		Morawitz, 1876	R. Murao	2012	R. Miyanaga	04/09/2002	KZ	South Kazakhstan Prov.	KZ37	Aksu Jabagly, alt. 1080-1830 m, South Kazakhstan Prov.			F	host: Mentha asiatica	1
BeeCAsia0010039	BeeCAsia 39	28/5/2017	ELKU	BeeCAsia	Halictus (Platyhalictus) minor	Animalia	Arthropoda	Insecta	Hymenoptera	Halictidae	Halictinae	Halictus	minor		Morawitz, 1876	R. Murao	2012	R. Miyanaga	04/09/2002	KZ	South Kazakhstan Prov.	KZ37	Aksu Jabagly, alt. 1080-1830 m, South Kazakhstan Prov.			F	host: Mentha asiatica	1
BeeCAsia0010040	BeeCAsia 39	28/5/2017	ELKU	BeeCAsia	Halictus (Platyhalictus) minor	Animalia	Arthropoda	Insecta	Hymenoptera	Halictidae	Halictinae	Halictus	minor		Morawitz, 1876	R. Murao	2012	R. Miyanaga	04/09/2002	KZ	South Kazakhstan Prov.	KZ37	Aksu Jabagly, alt. 1080-1830 m, South Kazakhstan Prov.			F	host: Mentha asiatica	1
BeeCAsia0010041	BeeCAsia 39	28/5/2017	ELKU	BeeCAsia	Halictus (Platyhalictus) minor	Animalia	Arthropoda	Insecta	Hymenoptera	Halictidae	Halictinae	Halictus	minor		Morawitz, 1876	R. Murao	2012	R. Miyanaga	04/09/2002	KZ	South Kazakhstan Prov.	KZ37	Aksu Jabagly, alt. 1080-1830 m, South Kazakhstan Prov.			F	host: Mentha asiatica	1
BeeCAsia0010089	BeeCAsia 32	28/5/2017	ELKU	BeeCAsia	Halictus (Monilapis) compressus transvolgensis	Animalia	Arthropoda	Insecta	Hymenoptera	Halictidae	Halictinae	Halictus	compressus	transvolgensis	Pesenko, 1985	R. Murao	2012	R. Miyanaga	04/09/2002	KZ	South Kazakhstan Prov.	KZ37	Aksu Jabagly, alt. 1080-1830 m, South Kazakhstan Prov.			F	host: Mentha asiatica	1
BeeCAsia0010129	BeeCAsia 32	28/5/2017	ELKU	BeeCAsia	Halictus (Monilapis) compressus transvolgensis	Animalia	Arthropoda	Insecta	Hymenoptera	Halictidae	Halictinae	Halictus	compressus	transvolgensis	Pesenko, 1985	R. Murao	2012	R. Miyanaga	04/09/2002	KZ	South Kazakhstan Prov.	KZ37	Aksu Jabagly, alt. 1080-1830 m, South Kazakhstan Prov.			F	host: Mentha asiatica	1
BeeCAsia0010027	BeeCAsia 32	28/5/2017	ELKU	BeeCAsia	Halictus (Tytthalictus) palustris	Animalia	Arthropoda	Insecta	Hymenoptera	Halictidae	Halictinae	Halictus	palustris		Morawitz, 1876	R. Murao	2012	O. Tadauchi	16/06/2003	KZ	South Kazakhstan Prov.	KZ38	Aksu Valley, Jabagly, alt. 130-560 m, South Kazakhstan Prov.			F		1
BeeCAsia0010088	BeeCAsia 32	28/5/2017	ELKU	BeeCAsia	Halictus (Monilapis) compressus transvolgensis	Animalia	Arthropoda	Insecta	Hymenoptera	Halictidae	Halictinae	Halictus	compressus	transvolgensis	Pesenko, 1985	R. Murao	2012	O. Tadauchi	16/06/2003	KZ	South Kazakhstan Prov.	KZ38	Aksu Valley, Jabagly, alt. 130-560 m, South Kazakhstan Prov.			F		1
BeeCAsia0010111	BeeCAsia 32	28/5/2017	ELKU	BeeCAsia	Halictus (Monilapis) compressus transvolgensis	Animalia	Arthropoda	Insecta	Hymenoptera	Halictidae	Halictinae	Halictus	compressus	transvolgensis	Pesenko, 1985	R. Murao	2012	O. Tadauchi	16/06/2003	KZ	South Kazakhstan Prov.	KZ38	Aksu Valley, Jabagly, alt. 130-560 m, South Kazakhstan Prov.			F		1
BeeCAsia0010112	BeeCAsia 32	28/5/2017	ELKU	BeeCAsia	Halictus (Monilapis) compressus transvolgensis	Animalia	Arthropoda	Insecta	Hymenoptera	Halictidae	Halictinae	Halictus	compressus	transvolgensis	Pesenko, 1985	R. Murao	2012	O. Tadauchi	16/06/2003	KZ	South Kazakhstan Prov.	KZ38	Aksu Valley, Jabagly, alt. 130-560 m, South Kazakhstan Prov.			F		1
BeeCAsia0010113	BeeCAsia 32	28/5/2017	ELKU	BeeCAsia	Halictus (Monilapis) compressus transvolgensis	Animalia	Arthropoda	Insecta	Hymenoptera	Halictidae	Halictinae	Halictus	compressus	transvolgensis	Pesenko, 1985	R. Murao	2012	O. Tadauchi	16/06/2003	KZ	South Kazakhstan Prov.	KZ38	Aksu Valley, Jabagly, alt. 130-560 m, South Kazakhstan Prov.			F		1
BeeCAsia0010114	BeeCAsia 32	28/5/2017	ELKU	BeeCAsia	Halictus (Monilapis) compressus transvolgensis	Animalia	Arthropoda	Insecta	Hymenoptera	Halictidae	Halictinae	Halictus	compressus	transvolgensis	Pesenko, 1985	R. Murao	2012	O. Tadauchi	16/06/2003	KZ	South Kazakhstan Prov.	KZ38	Aksu Valley, Jabagly, alt. 130-560 m, South Kazakhstan Prov.			F		1
BeeCAsia0010115	BeeCAsia 32	28/5/2017	ELKU	BeeCAsia	Halictus (Monilapis) compressus transvolgensis	Animalia	Arthropoda	Insecta	Hymenoptera	Halictidae	Halictinae	Halictus	compressus	transvolgensis	Pesenko, 1985	R. Murao	2012	O. Tadauchi	16/06/2003	KZ	South Kazakhstan Prov.	KZ38	Aksu Valley, Jabagly, alt. 130-560 m, South Kazakhstan Prov.			F		1
BeeCAsia0010140	BeeCAsia 32	28/5/2017	ELKU	BeeCAsia	Halictus (Monilapis) compressus transvolgensis	Animalia	Arthropoda	Insecta	Hymenoptera	Halictidae	Halictinae	Halictus	compressus	transvolgensis	Pesenko, 1985	R. Murao	2012	O. Tadauchi	16/06/2003	KZ	South Kazakhstan Prov.	KZ38	Aksu Valley, Jabagly, alt. 130-560 m, South Kazakhstan Prov.			F		1
BeeCAsia0010141	BeeCAsia 32	28/5/2017	ELKU	BeeCAsia	Halictus (Monilapis) compressus transvolgensis	Animalia	Arthropoda	Insecta	Hymenoptera	Halictidae	Halictinae	Halictus	compressus	transvolgensis	Pesenko, 1985	R. Murao	2012	O. Tadauchi	16/06/2003	KZ	South Kazakhstan Prov.	KZ38	Aksu Valley, Jabagly, alt. 130-560 m, South Kazakhstan Prov.			F		1
BeeCAsia0010142	BeeCAsia 32	28/5/2017	ELKU	BeeCAsia	Halictus (Monilapis) compressus transvolgensis	Animalia	Arthropoda	Insecta	Hymenoptera	Halictidae	Halictinae	Halictus	compressus	transvolgensis	Pesenko, 1985	R. Murao	2012	O. Tadauchi	16/06/2003	KZ	South Kazakhstan Prov.	KZ38	Aksu Valley, Jabagly, alt. 130-560 m, South Kazakhstan Prov.			F		1
BeeCAsia0010143	BeeCAsia 32	28/5/2017	ELKU	BeeCAsia	Halictus (Monilapis) compressus transvolgensis	Animalia	Arthropoda	Insecta	Hymenoptera	Halictidae	Halictinae	Halictus	compressus	transvolgensis	Pesenko, 1985	R. Murao	2012	O. Tadauchi	16/06/2003	KZ	South Kazakhstan Prov.	KZ38	Aksu Valley, Jabagly, alt. 130-560 m, South Kazakhstan Prov.			F		1
BeeCAsia0010144	BeeCAsia 32	28/5/2017	ELKU	BeeCAsia	Halictus (Monilapis) compressus transvolgensis	Animalia	Arthropoda	Insecta	Hymenoptera	Halictidae	Halictinae	Halictus	compressus	transvolgensis	Pesenko, 1985	R. Murao	2012	O. Tadauchi	16/06/2003	KZ	South Kazakhstan Prov.	KZ38	Aksu Valley, Jabagly, alt. 130-560 m, South Kazakhstan Prov.			F		1
BeeCAsia0010145	BeeCAsia 32	28/5/2017	ELKU	BeeCAsia	Halictus (Monilapis) compressus transvolgensis	Animalia	Arthropoda	Insecta	Hymenoptera	Halictidae	Halictinae	Halictus	compressus	transvolgensis	Pesenko, 1985	R. Murao	2012	O. Tadauchi	16/06/2003	KZ	South Kazakhstan Prov.	KZ38	Aksu Valley, Jabagly, alt. 130-560 m, South Kazakhstan Prov.			F		1
BeeCAsia0010146	BeeCAsia 32	28/5/2017	ELKU	BeeCAsia	Halictus (Monilapis) compressus transvolgensis	Animalia	Arthropoda	Insecta	Hymenoptera	Halictidae	Halictinae	Halictus	compressus	transvolgensis	Pesenko, 1985	R. Murao	2012	O. Tadauchi	16/06/2003	KZ	South Kazakhstan Prov.	KZ38	Aksu Valley, Jabagly, alt. 130-560 m, South Kazakhstan Prov.			F		1
BeeCAsia0010153	BeeCAsia 32	28/5/2017	ELKU	BeeCAsia	Halictus (Monilapis) compressus transvolgensis	Animalia	Arthropoda	Insecta	Hymenoptera	Halictidae	Halictinae	Halictus	compressus	transvolgensis	Pesenko, 1985	R. Murao	2012	O. Tadauchi	16/06/2003	KZ	South Kazakhstan Prov.	KZ38	Aksu Valley, Jabagly, alt. 130-560 m, South Kazakhstan Prov.			F		1
BeeCAsia0010154	BeeCAsia 32	28/5/2017	ELKU	BeeCAsia	Halictus (Monilapis) compressus transvolgensis	Animalia	Arthropoda	Insecta	Hymenoptera	Halictidae	Halictinae	Halictus	compressus	transvolgensis	Pesenko, 1985	R. Murao	2012	O. Tadauchi	16/06/2003	KZ	South Kazakhstan Prov.	KZ38	Aksu Valley, Jabagly, alt. 130-560 m, South Kazakhstan Prov.			F		1
BeeCAsia0011414	BeeCAsia 20	28/5/2017	ELKU	BeeCAsia	Halictus (Seladonia) pjalmensis pjalmensis	Animalia	Arthropoda	Insecta	Hymenoptera	Halictidae	Halictinae	Halictus	pjalmensis	pjalmensis	Strand, 1909	R. Murao	2012	O. Tadauchi	16/06/2003	KZ	South Kazakhstan Prov.	KZ38	Aksu Valley, Jabagly, alt. 130-560 m, South Kazakhstan Prov.			F		1
BeeCAsia0010128	BeeCAsia 32	28/5/2017	ELKU	BeeCAsia	Halictus (Monilapis) compressus transvolgensis	Animalia	Arthropoda	Insecta	Hymenoptera	Halictidae	Halictinae	Halictus	compressus	transvolgensis	Pesenko, 1985	R. Murao	2012	R. Miyanaga	06/09/2002	KZ	South Kazakhstan Prov.	KZ38	Aksu Valley, Jabagly, alt. 130-560 m, South Kazakhstan Prov.			F		1
BeeCAsia0010022	BeeCAsia 32	28/5/2017	ELKU	BeeCAsia	Halictus (Tytthalictus) palustris	Animalia	Arthropoda	Insecta	Hymenoptera	Halictidae	Halictinae	Halictus	palustris		Morawitz, 1876	R. Murao	2012	O. Tadauchi	22/05/2004	KZ	Almaty Prov.	KZ13	Big Almaty Lake, alt. 1230-2050 m, Almaty Prov.			F		1
BeeCAsia0010023	BeeCAsia 32	28/5/2017	ELKU	BeeCAsia	Halictus (Tytthalictus) palustris	Animalia	Arthropoda	Insecta	Hymenoptera	Halictidae	Halictinae	Halictus	palustris		Morawitz, 1876	R. Murao	2012	O. Tadauchi	22/05/2004	KZ	Almaty Prov.	KZ13	Big Almaty Lake, alt. 1230-2050 m, Almaty Prov.			F		1
BeeCAsia0010024	BeeCAsia 32	28/5/2017	ELKU	BeeCAsia	Halictus (Tytthalictus) palustris	Animalia	Arthropoda	Insecta	Hymenoptera	Halictidae	Halictinae	Halictus	palustris		Morawitz, 1876	R. Murao	2012	O. Tadauchi	22/05/2004	KZ	Almaty Prov.	KZ13	Big Almaty Lake, alt. 1230-2050 m, Almaty Prov.			F		1
BeeCAsia0010116	BeeCAsia 32	28/5/2017	ELKU	BeeCAsia	Halictus (Monilapis) compressus transvolgensis	Animalia	Arthropoda	Insecta	Hymenoptera	Halictidae	Halictinae	Halictus	compressus	transvolgensis	Pesenko, 1985	R. Murao	2012	O. Tadauchi	22/05/2004	KZ	Almaty Prov.	KZ13	Big Almaty Lake, alt. 1230-2050 m, Almaty Prov.			F		1
BeeCAsia0010136	BeeCAsia 32	28/5/2017	ELKU	BeeCAsia	Halictus (Monilapis) compressus transvolgensis	Animalia	Arthropoda	Insecta	Hymenoptera	Halictidae	Halictinae	Halictus	compressus	transvolgensis	Pesenko, 1985	R. Murao	2012	O. Tadauchi	22/05/2004	KZ	Almaty Prov.	KZ13	Big Almaty Lake, alt. 1230-2050 m, Almaty Prov.			F		1
BeeCAsia0010137	BeeCAsia 32	28/5/2017	ELKU	BeeCAsia	Halictus (Monilapis) compressus transvolgensis	Animalia	Arthropoda	Insecta	Hymenoptera	Halictidae	Halictinae	Halictus	compressus	transvolgensis	Pesenko, 1985	R. Murao	2012	O. Tadauchi	22/05/2004	KZ	Almaty Prov.	KZ13	Big Almaty Lake, alt. 1230-2050 m, Almaty Prov.			F		1
BeeCAsia0010117	BeeCAsia 32	28/5/2017	ELKU	BeeCAsia	Halictus (Monilapis) compressus transvolgensis	Animalia	Arthropoda	Insecta	Hymenoptera	Halictidae	Halictinae	Halictus	compressus	transvolgensis	Pesenko, 1985	R. Murao	2012	R. Murao	22/05/2004	KZ	Almaty Prov.	KZ13	Big Almaty Lake, alt. 1230-2050 m, Almaty Prov.			F		1
BeeCAsia0010110	BeeCAsia 32	28/5/2017	ELKU	BeeCAsia	Halictus (Monilapis) compressus transvolgensis	Animalia	Arthropoda	Insecta	Hymenoptera	Halictidae	Halictinae	Halictus	compressus	transvolgensis	Pesenko, 1985	R. Murao	2012	O. Tadauchi	01/09/2002	KZ	Almaty Prov.	KZ13	Big Almaty Lake, alt. 1230-2050 m, Almaty Prov.			F		1
BeeCAsia0010019	BeeCAsia 32	28/5/2017	ELKU	BeeCAsia	Halictus (Tytthalictus) palustris	Animalia	Arthropoda	Insecta	Hymenoptera	Halictidae	Halictinae	Halictus	palustris		Morawitz, 1876	R. Murao	2012	O. Tadauchi	19/06/2003	KZ	Almaty Prov.	KZ13	Big Almaty Lake, alt. 1230-2050 m, Almaty Prov.			F		1
BeeCAsia0010016	BeeCAsia 32	28/5/2017	ELKU	BeeCAsia	Halictus (Tytthalictus) palustris	Animalia	Arthropoda	Insecta	Hymenoptera	Halictidae	Halictinae	Halictus	palustris		Morawitz, 1876	R. Murao	2012	O. Tadauchi	28/08/2004	KZ	Almaty Prov.	KZ13	Big Almaty Lake, alt. 1230-2050 m, Almaty Prov.			F		1
BeeCAsia0010108	BeeCAsia 32	28/5/2017	ELKU	BeeCAsia	Halictus (Monilapis) compressus transvolgensis	Animalia	Arthropoda	Insecta	Hymenoptera	Halictidae	Halictinae	Halictus	compressus	transvolgensis	Pesenko, 1985	R. Murao	2012	O. Tadauchi	17/06/2003	KZ	South Kazakhstan Prov.	KZ51	Karaalma alt. 1210 m, Near Jabagly, South Kazakhstan Prov.			F		1
BeeCAsia0010300	BeeCAsia 32	28/5/2017	ELKU	BeeCAsia	Halictus (Monilapis) compressus transvolgensis	Animalia	Arthropoda	Insecta	Hymenoptera	Halictidae	Halictinae	Halictus	compressus	transvolgensis	Pesenko, 1985	R. Murao	2012	O. Tadauchi	17/06/2003	KZ	South Kazakhstan Prov.	KZ51	Karaalma alt. 1210 m, Near Jabagly, South Kazakhstan Prov.			F		1
BeeCAsia0010301	BeeCAsia 32	28/5/2017	ELKU	BeeCAsia	Halictus (Monilapis) compressus transvolgensis	Animalia	Arthropoda	Insecta	Hymenoptera	Halictidae	Halictinae	Halictus	compressus	transvolgensis	Pesenko, 1985	R. Murao	2012	O. Tadauchi	17/06/2003	KZ	South Kazakhstan Prov.	KZ51	Karaalma alt. 1210 m, Near Jabagly, South Kazakhstan Prov.			F		1
BeeCAsia0010302	BeeCAsia 32	28/5/2017	ELKU	BeeCAsia	Halictus (Monilapis) compressus transvolgensis	Animalia	Arthropoda	Insecta	Hymenoptera	Halictidae	Halictinae	Halictus	compressus	transvolgensis	Pesenko, 1985	R. Murao	2012	O. Tadauchi	17/06/2003	KZ	South Kazakhstan Prov.	KZ51	Karaalma alt. 1210 m, Near Jabagly, South Kazakhstan Prov.			F		1
BeeCAsia0010303	BeeCAsia 32	28/5/2017	ELKU	BeeCAsia	Halictus (Monilapis) compressus transvolgensis	Animalia	Arthropoda	Insecta	Hymenoptera	Halictidae	Halictinae	Halictus	compressus	transvolgensis	Pesenko, 1985	R. Murao	2012	O. Tadauchi	17/06/2003	KZ	South Kazakhstan Prov.	KZ51	Karaalma alt. 1210 m, Near Jabagly, South Kazakhstan Prov.			F		1
BeeCAsia0010304	BeeCAsia 32	28/5/2017	ELKU	BeeCAsia	Halictus (Monilapis) compressus transvolgensis	Animalia	Arthropoda	Insecta	Hymenoptera	Halictidae	Halictinae	Halictus	compressus	transvolgensis	Pesenko, 1985	R. Murao	2012	O. Tadauchi	17/06/2003	KZ	South Kazakhstan Prov.	KZ51	Karaalma alt. 1210 m, Near Jabagly, South Kazakhstan Prov.			F		1
BeeCAsia0011424	BeeCAsia 20	28/5/2017	ELKU	BeeCAsia	Halictus (Seladonia) pjalmensis pjalmensis	Animalia	Arthropoda	Insecta	Hymenoptera	Halictidae	Halictinae	Halictus	pjalmensis	pjalmensis	Strand, 1909	R. Murao	2012	O. Tadauchi	17/06/2003	KZ	South Kazakhstan Prov.	KZ51	Karaalma alt. 1210 m, Near Jabagly, South Kazakhstan Prov.			F		1
BeeCAsia0011425	BeeCAsia 20	28/5/2017	ELKU	BeeCAsia	Halictus (Seladonia) pjalmensis pjalmensis	Animalia	Arthropoda	Insecta	Hymenoptera	Halictidae	Halictinae	Halictus	pjalmensis	pjalmensis	Strand, 1909	R. Murao	2012	O. Tadauchi	17/06/2003	KZ	South Kazakhstan Prov.	KZ51	Karaalma alt. 1210 m, Near Jabagly, South Kazakhstan Prov.			F		1
[truncated: 15,173 more rows]
